# Supplementary material for: Sequencing-guided re-estimation and promotion of cultivability for environmental bacteria
Source: Research Square preprint supplement (doi:10.21203/rs.3.rs-3607919/v1), 2023-11-30
Supplement: Supplementary file 1 [file e2d4f2037753374e040ea4b0.xlsx]

## Sheet: TableS1_Sample list
Amplicon sequencing
Sample type	Sample name	Location	Collection Date	Process	Culturomics（No. of plates)						Used in PCT calculation or not	Replication of original AS	Replication of inoculum	Short-term exposure treatment
Soil(6)	TA	Xiamen	20190318	/	AE-In situ (6)	AE-TSA (6)	AN-In situ (6)	AN-TSA (6)	MI-In situ (6)	MI-TSA (6)	YES	3	3	/	/	/	/	/	/	/	/	/	/
	SM	Xiamen	20190501	/	AE-In situ (6)	AE-TSA (5)	AN-In situ (6)	AN-TSA (6)	MI-In situ (6)	MI-TSA (6)	YES	4	3	/	/	/	/	/	/	/	/	/	/
	HN	Zhumadian	20190904	/	AE-In situ (18)	AE-TSA (6)	/	/	/	/	YES	4	4	/	/	/	/	/	/	/	/	/	/
	YN	Dehong	20191023	/	AE-In situ (6)	AE-TSA (6)	AN-In situ (6)	AN-TSA (6)	MI-In situ (6)	MI-TSA (6)	YES	4	2	/	/	/	/	/	/	/	/	/	/
	NX	Ningxia	20191104	/	AE-In situ (6)	AE-TSA (6)	AN-In situ (6)	AN-TSA (6)	MI-In situ (6)	MI-TSA (6)	YES	3	3	/	/	/	/	/	/	/	/	/	/
	GD	Dongguan	20200602	/	AE-In situ (6)	AE-TSA (7)	AN-In situ (7)	AN-TSA (6)	/	/	YES	5	3	/	/	/	/	/	/	/	/	/	/
Full scale WWTP activated sludge(8)	XM1	Xiamen	20181220	AAO	AE-In situ (6)	AE-R2A (6)	AN-In situ (6)	AN-R2A (6)	MI-In situ (6)	MI-R2A (6)	YES	4	2	/	/	/	/	/	/	/	/	/	/
	SZ	Shenzhen	20191101	AAO	/	AE-R2A (12)	/	AN-R2A (12)	/	/	YES	4	8	/	/	/	/	/	/	/	/	/	/
	NJ	Nanjing	20200709	AAO	AE-In situ (6)	AE-R2A (6)	AN-In situ (6)	AN-R2A (6)	/	/	YES	8	7	/	/	/	/	/	/	/	/	/	/
	SH	Shanghai	20200817	AAO	AE-In situ (6)	AE-R2A (6)	AN-In situ (6)	AN-R2A (6)	/	/	YES	4	4	/	/	/	/	/	/	/	/	/	/
	XM2	Xiamen	20200831	AAO	AE-In situ (6)	AE-R2A (6)	AN-In situ (6)	AN-R2A (6)	/	/	YES	7	3	/	/	/	/	/	/	/	/	/	/
	XM3	Xiamen	20230715	AAO	/	AE-R2A (6)	/	/	/	/	NO	/	/	rDNA-O (1)	rDNA-UI (3)	rDNA-UR (3)	rDNA-DI (3)	rDNA-DR (3)	rRNA-O (1)	rRNA-UI (3)	rRNA-UR (3)	rRNA-DI (3)	rRNA-DR (3)
	XM4	Xiamen	20221230	AAO	AE-Vb12 (6)	AE-R2A (6)	/	/	/	/	NO	/	/	/	/	/	/	/	/	/	/	/	/
	ZZ1	Zhangzhou	20230302	AAO	AE-Vb12 (4)	AE-R2A (5)	/	/	/	/	NO	/	/	/	/	/	/	/	/	/	/	/	/
Lab scale EBPR reactor activated sludge(1)	EBPR	Xiamen	20180428	EBPR	AE-In situ (7)	AE-R2A (7)	AE-Artificial (7)	AN-In situ (7)	AN-R2A (7)	AN-Artificial (7)	NO	/	/	/	/	/	/	/	/	/	/	/	/
Annotation: Oxygen condition:AE[aerobic], AN[anaerobic], MI[micro-aerobic]. Culture medium_type:In situ[In situ aqueous culture-medium], R2A[R2A culture-medium], TSA[1%TSA culture-medium], Vb12[R2A+Vb12 culture-medium]. Short-term exposure treatment：O[original-in situ], UI[untreated-in situ], DI[dispersed-in situ], UR[untreated-R2A], DR[dispersed-R2A]
Metagenomic sequencing
Sample type	Sample name	Location	ID	Collection Date	Clean reads single end (PE150)		Description				Used in phenotype-genotype comparison or not
Full scale WWTP activated sludge(8)	XM1	Xiamen	ASGE1	20181220	40441677		Plate(AE-In situ)				YES
			ASGE2		36766161		Plate(MI-In situ)
			ASGE3		40834768		Original activated sludge
	SZ	Shenzhen	SZAS3	20191101	52624284		Plate(MI-In situ)				YES
			SZAS22		53704466		Plate(AN-R2A)
			SZAS25		51413304		Original activated sludge
	NJ	Nanjing	NJASGE1	20200709	36916847		Plate(AE-In situ)				YES
			NJASGE2		43932641		Plate(AN-In situ)
			NJASGE3		52163507		Original activated sludge
	SH	Shanghai	SHASGE1	20200817	34779490		Plate(AE-In situ)				YES
			SHASGE2		35154860		Plate(AN-R2A)
			SHASGE3		50098237		Original activated sludge
	XM2	Xiamen	XAASGE1	20200831	37450974		Plate(AE-In situ)				YES
			XAASGE2		34544957		Plate(AN-In situ)
			XAASGE4		52376620		Original activated sludge
	ZZ2	Zhangzhou	ZZA25	20211015	33854347		Plate(AE-R2A)				NO
			ZZA245		34013397		Plate(AE-In situ)
	ZZ3	Zhangzhou	ZZA248	20211015	34450750		Plate(AE-In situ)
	XM5	Xiamen	ASISGE4	20190420	39431150		Plate(AE-In situ)				NO
	XM6	Xiamen	XAHMGE1	20201211	51569334		Plate(AN-In situ)				NO
Lab scale EBPR reactor activated sludge(1)	EBPR	Xiamen	S431	20180428	31765880		Plate(AN-In situ)				YES
			S472		30904779		Plate(AN-In situ)
			ORI4		58962385		Original activated sludge

## Sheet: TableS2_Contaminant list
Contaminant_asv_id	Tax_Ezbiocloud	Seqs
Con_seq_1(internal standard)	Bacteria(100);Bacteroidetes(100);Flavobacteria(100);Flavobacteriales(100);Cryomorphaceae(100);AF468245_g(100);AF468245_s(100);	TACGTAGGGTCCAAGCGTTATCCGGAATTATTGGGTTTAAAGGGTCCGTAGGCGGGCCTATAAGTCAGAGGTGAAATCTTACAGCTTAACTGTGAAATTGCCTTTGATACTGTAGGTCTTGAGTGTGAATGAAGTGGGCGGAATGAGATGTGTAGCGGTGAAATGCTTAGATATGTCTCAGAACACCGATTGCGAAGGCAGCTCACTAAGCCACAACTGACGCTGAGGGACGAAAGCGTGGGGAGCGAACAGG
Con_seq_2	Bacteria(100);Proteobacteria(100);Betaproteobacteria(100);Burkholderiales(100);Burkholderiaceae(100);Burkholderia(100);Burkholderia ubonensis(100);	TACGTAGGGTGCGAGCGTTAATCGGAATTACTGGGCGTAAAGCGTGCGCAGGCGGTTTGCTAAGACCGATGTGAAATCCCCGGGCTCAACCTGGGAACTGCATTGGTGACTGGCAGGCTAGAGTATGGCAGAGGGGGGTAGAATTCCACGTGTAGCAGTGAAATGCGTAGAGATGTGGAGGAATACCGATGGCGAAGGCAGCCCCCTGGGCCAATACTGACGCTCATGCACGAAAGCGTGGGGAGCAAACAGG
Con_seq_3	Bacteria(100);Proteobacteria(100);Betaproteobacteria(100);Burkholderiales(100);Ralstonia_f(100);Ralstonia(100);Ralstonia_unclassified(100);	TACGTAGGGTCCAAGCGTTAATCGGAATTACTGGGCGTAAAGCGTGCGCAGGCGGTTGTGCAAGACCGATGTGAAATCCCCGAGCTTAACTTGGGAATTGCATTGGTGACTGCACGGCTAGAGTGTGTCAGAGGGGGGTAGAATTCCACGTGTAGCAGTGAAATGCGTAGAGATGTGGAGGAATACCGATGGCGAAGGCAGCCCCCTGGGATAACACTGACGCTCATGCACGAAAGCGTGGGGAGCAAACAGG
Con_seq_4	Bacteria(88);Bacteria_unclassified(88);Bacteria_unclassified(88);Bacteria_unclassified(88);Bacteria_unclassified(88);Bacteria_unclassified(88);Bacteria_unclassified(88);	CATCGGTCAGCAGCCATTCATGGTGAAGATATACACCCAAATTTCCTTCTGTTTCCCTATTACCGACCCTTCCACTCACCCAGCCATTACTGCTACACTAAAGACTGGTTTGCAACGTTTGTCTCAATCTTTTCCTTGGGTCGCTGGTCAAGTTAAAGACGATGGCACTGGAGTCTTTAAGATTAAACCTTTTGAGGAAACACCACCATTGGTTGTTAAAGATTTAAGAGATGATCCTAGTGCCC
Con_seq_5	Bacteria(100);Proteobacteria(100);Betaproteobacteria(100);Burkholderiales(99);Burkholderiaceae(98);Burkholderiaceae_unclassified(98);Burkholderiaceae_unclassified(98);	TACGTAGGGTGCGAGCGTTAATCGGAATTACTGGGCGTAAAGCGTGCGCAGGCGGTTCGCTAAGACCGATGTGAAATCCCCGGGCTTAACCTGGGAACTGCATTGGTGACTGGCGGGCTAGAGTATGGCAGAGGGGGGTAGAATTCCACGTGTAGCAGTGAAATGCGTAGAGATGTGGAGGAATACCGATGGCGAAGGCAGCCCCCTGGGCCAATACTGACGCTCATGCACGAAAGCGTGGGGAGCAAACAGG
Con_seq_6	Bacteria(100);Proteobacteria(100);Betaproteobacteria(100);Burkholderiales(100);Ralstonia_f(100);Ralstonia(100);Ralstonia syzygii(100);	TACGTAGGGTCCAAGCGTTAATCGGAATTACTGGGCGTAAAGCGTGCGCAGGCGGTTGTGCAAGACCGATGTGAAATCCCCGGGCTTAACCTGGGAATTGCATTGGTGACTGCACGGCTAGAGTGTGTCAGAGGGGGGTAGAATTCCACGTGTAGCAGTGAAATGCGTAGAGATGTGGAGGAATACCGATGGCGAAGGCAGCCCCCTGGGATAACACTGACGCTCATGCACGAAAGCGTGGGGAGCAAACAGG
Con_seq_7	Bacteria(100);Bacteroidetes(100);Bacteroidia(100);Bacteroidales(100);Prevotellaceae(100);Prevotella(100);Prevotella copri(84);	TACGGAAGGTCCGGGCGTTATCCGGATTTATTGGGTTTAAAGGGAGCGTAGGCCGGAGATTAAGCGTGTTGTGAAATGTAGACGCTCAACGTCTGCACTGCAGCGCGAACTGGTTTCCTTGAGTACGCACAAAGTGGGCGGAATTCGTGGTGTAGCGGTGAAATGCTTAGATATCACGAAGAACTCCGATTGCGAAGGCAGCTCACTGGAGCGCAACTGACGCTGAAGCTCGAAAGTGCGGGTATCGAACAGG
Con_seq_8	Bacteria(100);Proteobacteria(100);Alphaproteobacteria(100);Rhizobiales(100);Bradyrhizobiaceae(100);Bradyrhizobium(85);Bradyrhizobium daqingense(85);	TACGAAGGGGGCTAGCGTTGCTCGGAATCACTGGGCGTAAAGGGTGCGTAGGCGGGTCTTTAAGTCAGGGGTGAAATCCTGGAGCTCAACTCCAGAACTGCCTTTGATACTGAAGATCTTGAGTTCGGGAGAGGTGAGTGGAACTGCGAGTGTAGAGGTGAAATTCGTAGATATTCGCAAGAACACCAGTGGCGAAGGCGGCTCACTGGCCCGATACTGACGCTGAGGCACGAAAGCGTGGGGAGCAAACAGG
Con_seq_9	Bacteria(100);Proteobacteria(100);Alphaproteobacteria(100);Rhizobiales(100);Rhizobiaceae(96);Rhizobium(96);Rhizobium fabae(96);	TACGAAGGGGGCTAGCGTTGTTCGGAATTACTGGGCGTAAAGCGCACGTAGGCGGATCGATCAGTCAGGGGTGAAATCCCAGGGCTCAACCCTGGAACTGCCTTTGATACTGTCGATCTGGAGTATGGAAGAGGTGAGTGGAATTCCGAGTGTAGAGGTGAAATTCGTAGATATTCGGAGGAACACCAGTGGCGAAGGCGGCTCACTGGTCCATTACTGACGCTGAGGTGCGAAAGCGTGGGGAGCAAACAGG
Con_seq_10	Bacteria(100);Proteobacteria(100);Betaproteobacteria(100);Burkholderiales(100);Burkholderiaceae(100);Caballeronia(100);Caballeronia_unclassified(100);	TACGTAGGGTGCGAGCGTTAATCGGAATTACTGGGCGTAAAGCGTGCGCAGGCGGTCTGTTAAGACCGATGTGAAATCCCCGGGCTTAACCTGGGAACTGCATTGGTGACTGGCAGGCTTTGAGTGTGGCAGAGGGAGGTAGAATTCCACGTGTAGCAGTGAAATGCGTAGAGATGTGGAGGAATACCGATGGCGAAGGCAGCCTCCTGGGCCAACACTGACGCTCATGCACGAAAGCGTGGGGAGCAAACAGG
Con_seq_11	Bacteria(100);Proteobacteria(100);Betaproteobacteria(100);Burkholderiales(100);Burkholderiaceae(99);Burkholderiaceae_unclassified(99);Burkholderiaceae_unclassified(99);	TACGTAGGGTGCGAGCGTTAATCGGAATTACTGGGCGTAAAGCGTGCGCAGGCGGTCTGTTAAGACCGATGTGAAATCCCCGGGCTTAACCTGGGAACTGCATTGGTGACTGGCAGGCTTTGAGTATGGCAGAGGGGGGTAGAATTCCACGTGTAGCAGTGAAATGCGTAGAGATGTGGAGGAATACCGATGGCGAAGGCAGCCCCCTGGGCCAATACTGACGCTCATGCACGAAAGCGTGGGGAGCAAACAGG
Con_seq_12	Bacteria(100);Actinobacteria(100);Actinobacteria_c(100);Micrococcales(100);Micrococcaceae(100);Arthrobacter(100);EU019987_s(100);	TACGTAGGGCGCAAGCGTTATCCGGAATTATTGGGCGTAAAGAGCTCGTAGGCGGTTTGTCGCGTCTGCTGTGAAAGACCGGGGCTCAACTCCGGTTCTGCAGTGGGTACGGGCAGACTAGAGTGATGTAGGGGAGACTGGAATTCCTGGTGTAGCGGTGAAATGCGCAGATATCAGGAGGAACACCGATGGCGAAGGCAGGTCTCTGGGCATTAACTGACGCTGAGGAGCGAAAGCATGGGGAGCGAACAGG
Con_seq_13	Bacteria(100);Firmicutes(100);Bacilli(100);Bacillales(100);Bacillaceae(100);Geobacillus(100);Geobacillus subterraneus(94);	TACGTAGGGGGCGAGCGTTGTCCGGAATTATTGGGCGTAAAGCGCGCGCAGGCGGTTCCTTAAGTCTGATGTGAAAGCCCACGGCTCAACCGTGGAGGGTCATTGGAAACTGGGGGACTTGAGTGCAGGAGAGGAGAGCGGAATTCCACGTGTAGCGGTGAAATGCGTAGAGATGTGGAGGAACACCAGTGGCGAAGGCGGCTCTCTGGCCTGCAACTGACGCTGAGGCGCGAAAGCGTGGGGAGCAAACAGG
Con_seq_14	Bacteria(100);Proteobacteria(100);Betaproteobacteria(100);Sterolibacterium_o(95);Sterolibacteriaceae(95);Methyloversatilis(94);KB900539_s(94);	TACGTAGGGTGCGAGCGTTAATCGGAATTACTGGGCGTAAAGCGTGCGCAGGCGGTTGTGTAAGACAGGTGTGAAATCCCCGGGCTTAACCTGGGAACTGCGCTTGTGACTGCACAGCTAGAGTATGGCAGAGGGGGGTGGAATTCCACGTGTAGCAGTGAAATGCGTAGAGATGTGGAGGAACACCGATGGCGAAGGCAGCCCCCTGGGCCAATACTGACGCTCATGCACGAAAGCGTGGGGAGCAAACAGG
Con_seq_15	Bacteria(100);Proteobacteria(100);Betaproteobacteria(100);Burkholderiales(100);Burkholderiaceae(100);Paraburkholderia(100);Paraburkholderia susongensis(88);	TACGTAGGGTGCGAGCGTTAATCGGAATTACTGGGCGTAAAGCGTGCGCAGGCGGTGATGTAAGACCGATGTGAAATCCCCGGGCTTAACCTGGGAACTGCATTGGTGACTGCATCGCTCGAGTATGGCAGAGGGGGGTAGAATTCCACGTGTAGCAGTGAAATGCGTAGAGATGTGGAGGAATACCGATGGCGAAGGCAGCCCCCTGGGTCAATACTGACGCTCATGCACGAAAGCGTGGGGAGCAAACAGG
Con_seq_16	Bacteria(100);Proteobacteria(100);Gammaproteobacteria(100);Xanthomonadales(100);Xanthomonadaceae(100);Xanthomonadaceae_unclassified(100);Xanthomonadaceae_unclassified(100);	TACGAAGGGTGCAAGCGTTAATCGGAATTACTGGGCGTAAAGCGTGCGTAGGCGGTTTTTTAAGTCTGCTGTGAAATCCCCGGGCTCAACCTGGGAATGGCAGTGGAAACTGGAAAGCTAGAGTGTGTCAGAGGATGGTGGAATTCCCGGTGTAGCGGTGAAATGCGTAGAGATCGGGAGGAACATCAGTGGCGAAGGCGGCCATCTGGGACAACACTGACGCTGAGGCACGAAAGCGTGGGGAGCAAACAGG
Con_seq_17	Bacteria(100);Firmicutes(100);Bacilli(100);Bacillales(100);Bacillaceae(100);Geobacillus(100);Geobacillus_unclassified(100);	TACGTAGGGGGCGAGCGTTGTCCGGAATTATTGGGCGTAAAGCGCGCGCAGGCGGTCCCTTAAGTCTGATGTGAAAGCCCACGGCTCAACCGTGGAGGGTCATTGGAAACTGGGGGACTTGAGTGCAGGAGAGGAGAGCGGAATTCCACGTGTAGCGGTGAAATGCGTAGAGATGTGGAGGAACACCAGTGGCGAAGGCGGCTCTCTGGCCTGCAACTGACGCTGAGGCGCGAAAGCGTGGGGAGCAAACAGG
Con_seq_18	Bacteria(100);Proteobacteria(100);Alphaproteobacteria(100);Caulobacterales(100);Caulobacteraceae(100);Caulobacter(100);JONW_s(100);	TACGAAGGGGGCTAGCGTTGCTCGGAATTACTGGGCGTAAAGGGAGCGTAGGCGGACTGTTTAGTCAGAGGTGAAAGCCCAGGGCTCAACCTTGGAATTGCCTTTGATACTGGCAGTCTTGAGTACGGAAGAGGTATGTGGAACTCCGAGTGTAGAGGTGAAATTCGTAGATATTCGGAAGAACACCAGTGGCGAAGGCGACATACTGGTCCGTTACTGACGCTGAGGCTCGAAAGCGTGGGGAGCAAACAGG
Con_seq_19	Bacteria(100);Actinobacteria(100);Actinobacteria_c(100);Micrococcales(100);Intrasporangiaceae(100);Phycicoccus(84);Phycicoccus badiiscoriae(83);	TACGTAGGGTGCGAGCGTTGTCCGGAATTATTGGGCGTAAAGAGCTTGTAGGCGGTTTGTCGCGTCTGCTGTGAAAATCCGGGGCTCAACCCCGGACTTGCAGTGGGTACGGGCAGACTAGAGTGTGGTAGGGGAGACTGGAATTCCTGGTGTAGCGGTGAAATGCGCAGATATCAGGAGGAACACCGATGGCGAAGGCAGGTCTCTGGGCCACTACTGACGCTGAGAAGCGAAAGCATGGGGAGCGAACAGG
Con_seq_20	Bacteria(100);Proteobacteria(100);Gammaproteobacteria(100);Pseudomonadales(100);Moraxellaceae(100);Acinetobacter(100);Acinetobacter_unclassified(100);	TACAGAGGGTGCAAGCGTTAATCGGATTTACTGGGCGTAAAGCGCGCGTAGGTGGCCAATTAAGTCAAATGTGAAATCCCCGAGCTTAACTTGGGAATTGCATTCGATACTGGTTGGCTAGAGTATGGGAGAGGATGGTAGAATTCCAGGTGTAGCGGTGAAATGCGTAGAGATCTGGAGGAATACCGATGGCGAAGGCAGCCATCTGGCCTAATACTGACACTGAGGTGCGAAAGCATGGGGAGCAAACAGG
Con_seq_21	Bacteria(100);Proteobacteria(100);Alphaproteobacteria(100);Caulobacterales(100);Caulobacteraceae(100);Caulobacteraceae_unclassified(100);Caulobacteraceae_unclassified(100);	TACGAAGGGGGCTAGCGTTGCTCGGAATTACTGGGCGTAAAGGGCGCGTAGGCGGACAGTTTAGTCAGAGGTGAAAGCCCAGGGCTCAACCTTGGAATTGCCTTTGATACTGGCTGTCTTGAGTACGGGAGAGGTGAGTGGAACTCCGAGTGTAGAGGTGAAATTCGTAGATATTCGGAAGAACACCAGTGGCGAAGGCGACTCACTGGCCCGTTACTGACGCTGAGGCGCGAAAGCGTGGGGAGCAAACAGG
Con_seq_22	Bacteria(100);Proteobacteria(100);Alphaproteobacteria(100);Rhodospirillales(100);Rhodospirillaceae(100);Azospirillum(100);FQ311869_s(95);	TACGAAGGGGGCTAGCGTTGTTCGGAATTACTGGGCGTAAAGGGCGCGTAGGCGGCCTGTTTAGTCAGAAGTGAAAGCCCCGGGCTCAACCTGGGAATAGCTTTTGATACTGGCAGGCTTGAGTTCCGGAGAGGATGGTGGAATTCCCAGTGTAGAGGTGAAATTCGTAGATATTGGGAAGAACACCGGTGGCGAAGGCGGCCATCTGGACGGACACTGACGCTGAGGCGCGAAAGCGTGGGGAGCAAACAGG
Con_seq_23	Bacteria(100);Firmicutes(100);Bacilli(100);Bacillales(100);Staphylococcaceae(100);Staphylococcus(100);Staphylococcus_unclassified(100);	TACGTAGGTGGCAAGCGTTATCCGGAATTATTGGGCGTAAAGCGCGCGTAGGCGGTTTCTTAAGTCTGATGTGAAAGCCCACGGCTCAACCGTGGAGGGTCATTGGAAACTGGGAAACTTGAGTACAGAAGAGGAAAGTGGAATTCCATGTGTAGCGGTGAAATGCGCAGAGATATGGAGGAACACCAGTGGCGAAGGCGACTTTCTGGTCCGTAACTGACGCTGATGTGCGAAAGCGTGGGGATCAAACAGG
Con_seq_24	Bacteria(100);Proteobacteria(100);Betaproteobacteria(100);Burkholderiales(100);Comamonadaceae(100);Aquabacterium(87);Aquabacterium olei(86);	TACGTAGGGTGCGAGCGTTAATCGGAATTACTGGGCGTAAAGCGTGCGCAGGCGGTTATGTAAGACAGATGTGAAATCCCCGGGCTCAACCTGGGAACTGCATTTGTGACTGCATGACTGGAGTGCGGCAGAGGGGGATGGAATTCCGCGTGTAGCAGTGAAATGCGTAGATATGCGGAGGAACACCGATGGCGAAGGCAATCCCCTGGGCCTGCACTGACGCTCATGCACGAAAGCGTGGGGAGCAAACAGG
Con_seq_25	Bacteria(100);Deinococcus-Thermus(100);Deinococci(100);Deinococcales(100);Deinococcaceae(100);Deinococcus(100);Deinococcus geothermalis(100);	TACGGAGGGTGCAAGCGTTACCCGGAATCACTGGGCGTAAAGGGCGTGTAGGCGGAAGGTTAAGTCCGACTTTAAAGACCGGGGCTCAACCCCGGGCCTGGGTTGGAGACTGGCGTTCTGGACCTCTGGAGAGGCAACTGGAATTCCTGGTGTAGCGGTGGAATGCGTAGATACCAGGAGGAACACCGATGGCGAAGGCAGGTTGCTGGACAGAAGGTGACGCTGAGGCGCGAAAGTGTGGGGAGCGAACCGG
Con_seq_26	Bacteria(100);Deinococcus-Thermus(100);Deinococci(100);Deinococcales(100);Deinococcaceae(100);Deinococcus(100);Deinococcus geothermalis(93);	TACGGAGGGTGCAAGCGTTACCCGGAATCACTGGGCGTAAAGGGCGTGTAGGCGGGAAGCTAAGTCCGACTTTAAAGACCGGGGCTCAACCCCGGGAGTGGGTTGGAGACTGGCTTTCTGGACCTCTGGAGAGGCAACTGGAATTCCTGGTGTAGCGGTGGAATGCGTAGATACCAGGAGGAACACCGATGGCGAAGGCAGGTTGCTGGACAGAAGGTGACGCTGAGGCGCGAAAGTGTGGGGAGCGAACCGG
Con_seq_27	Bacteria(100);Bacteroidetes(100);Sphingobacteriia(100);Sphingobacteriales(100);Sphingobacteriaceae(100);Mucilaginibacter(100);Mucilaginibacter yixingensis(91);	TACGGAGGATCCGAGCGTTATCCGGATTTATTGGGTTTAAAGGGTGCGTAGGCGGCCTATTAAGTCAGGGGTGAAAGACGGTAGCTCAACTATCGCAGTGCCCTTGATACTGATGGGCTTGAATGCAGCTGAGGTAGGCGGAATGTGACAAGTAGCGGTGAAATGCATAGATATGTCACAGAACACCGATTGCGAAGGCAGCTTACTAAAGTGCGATTGACGCTGAGGCACGAAAGCGTGGGGATCAAACAGG
Con_seq_28	Bacteria(100);Actinobacteria(100);Actinobacteria_c(100);Micrococcales(100);Microbacteriaceae(100);Leucobacter(96);DQ824690_s(84);	TACGTAGGGTGCAAGCGTTGTCCGGAATTATTGGGCGTAAAGAGCTCGTAGGCGGCTTGTCGCGTCTGCTGTGAAAACCCGGGGCTCAACCCCGGGCCTGCAGTGGGTACGGGCAGGCTAGAGTGCGGTAGGGGAGATTGGAATTCCTGGTGTAGCGGTGGAATGCGCAGATATCAGGAGGAACACCGATGGCGAAGGCAGATCTCTGGGCCGCTACTGACGCTGAGGAGCGAAAGCATGGGGAGCGAACAGG
Con_seq_29	Bacteria(100);Proteobacteria(100);Alphaproteobacteria(100);Rhizobiales(100);Rhizobiaceae(100);Shinella(94);Shinella curvata(82);	TACGAAGGGGGCTAGCGTTGTTCGGAATTACTGGGCGTAAAGCGCACGTAGGCGGGTATTTAAGTCAGGGGTGAAATCCCAGAGCTCAACTCTGGAACTGCCTTTGATACTGGGTACCTAGAGTATGGAAGAGGTAAGTGGAATTCCGAGTGTAGAGGTGAAATTCGTAGATATTCGGAGGAACACCAGTGGCGAAGGCGGCTTACTGGTCCATTACTGACGCTGAGGTGCGAAAGCGTGGGGAGCAAACAGG
Con_seq_30	Bacteria(100);Proteobacteria(100);Alphaproteobacteria(100);Caulobacterales(100);Caulobacteraceae(100);Phenylobacterium(100);Phenylobacterium_unclassified(100);	TACGAAGGGGGCTAGCGTTGCTCGGAATTACTGGGCGTAAAGGGCGCGTAGGCGGACAGTTTAGTCAGAGGTAAAAGCCCAGGGCTCAACCTTGGAACTGCCTTTGATACTGGCTGTCTTGAGTTCGGGAGAGGTGAGTGGAATGCCGAGTGTAGAGGTGAAATTCGTAGATATTCGGCGGAACACCAGTGGCGAAGGCGACTCACTGGCCCGATACTGACGCTGAGGCGCGAAAGCGTGGGGAGCAAACAGG
Con_seq_31	Bacteria(100);Bacteroidetes(100);Sphingobacteriia(100);Sphingobacteriales(100);Chitinophagaceae(100);Flavisolibacter(100);JF219888_s(88);	TACGGAGGGTGCAAGCGTTATCCGGATTCACTGGGTTTAAAGGGTGCGTAGGAGGGCAGGTAAGTCAGTGGTGAAATCTTCGAGCTTAACTCGGAAACTGCCGTTGATACTATCTGTCTTGAATATTGTGGAGGTGAGCGGAATATGTCATGTAGCGGTGAAATGCTTAGATATGACATAGAACACCAATTGCGAAGGCAGCTCGCTACACATATATTGACTCTGAGGCACGAAAGCGTGGGGATCAAACAGG
Con_seq_32	Bacteria(100);Deinococcus-Thermus(100);Deinococci(100);Deinococcales(100);Deinococcaceae(100);Deinococcus(100);Deinococcus geothermalis(100);	TACGGAGGGTGCAAGCGTTACCCGGAATCACTGGGCGTAAAGGGCGTGTAGGCGGGAAGCTAAGTCCGACTTTAAAGACCGGGGCTCAACCCCGGGCCTGGGTTGGAGACTGGCTTTCTGGACCTCTGGAGAGGCAACTGGAATTCCTGGTGTAGCGGTGGAATGCGTAGATACCAGGAGGAACACCGATGGCGAAGGCAGGTTGCTGGACAGAAGGTGACGCTGAGGCGCGAAAGTGTGGGGAGCGAACCGG
Con_seq_33	Bacteria(100);Chloroflexi(100);Caldilineae(100);Caldilineales(100);AF513086_f(100);AF513086_g(100);AF513086_s(100);	AACGTAGGTGGCGAGCGTTATCCGGATTTACTGGGCGTAAAGCGCGCGTAGGTGGTTGAGTAAGTTGGGTGTAAAATCTCTTGGCTTAACTGGGAGGAGACGCTCAAGACTGCTCGGCTTGAGGTCGAGAGAGGGGTGCAGAATTCCCGGTGTAGTGGTGGAATGCGTAGATATCGGGAGGAATACCAGTGGCGAAAGCGGCGCCCTGGCTCGCACCTGACACTGAGGCGCGAAAGCGTGGGGAGCGAACGGG
Con_seq_34	Bacteria(100);Bacteroidetes(100);Flavobacteria(100);Flavobacteriales(100);Flavobacteriaceae(100);Chryseobacterium(100);Chryseobacterium ginsenosidimutans(97);	TACGGAGGGTGCAAGCGTTATCCGGATTTATTGGGTTTAAAGGGTCCGTAGGCGGATCTGTAAGTCAGTGGTGAAATCTCATAGCTTAACTATGAAACTGCCATTGATACTGCAGGTCTTGAGTAAGGTAGAAGTAGCTGGAATAAGTAGTGTAGCGGTGAAATGCATAGATATTACTTAGAACACCAATTGCGAAGGCAGGTTACTATGTCTTAACTGACGCTGATGGACGAAAGCGTGGGGAGCGAACAGG
Con_seq_35	Bacteria(100);Proteobacteria(100);Gammaproteobacteria(100);Pseudomonadales(100);Pseudomonadaceae(100);Pseudomonas(100);Pseudomonas psychrotolerans(100);	TACGAAGGGTGCAAGCGTTAATCGGAATTACTGGGCGTAAAGCGCGCGTAGGTGGCTTGATAAGTTGGATGTGAAATCCCCGGGCTCAACCTGGGAACTGCATCCAAAACTGTCTGGCTAGAGTGCGGTAGAGGGTAGTGGAATTTCCAGTGTAGCGGTGAAATGCGTAGATATTGGAAGGAACACCAGTGGCGAAGGCGACTACCTGGACTGACACTGACACTGAGGTGCGAAAGCGTGGGGAGCAAACAGG
Con_seq_36	Bacteria(100);Proteobacteria(100);Gammaproteobacteria(100);Vibrionales(100);Vibrionaceae(100);Vibrio(98);Vibrio_unclassified(98);	TACGGAGGGTGCGAGCGTTAATCGGAATTACTGGGCGTAAAGCGCATGCAGGTGGTTTGTTAAGTCAGATGTGAAAGCCCGGGGCTCAACCTCGGAATTGCATTTGAAACTGGCAGACTAGAGTACTGTAGAGGGGGGTAGAATTTCAGGTGTAGCGGTGAAATGCGTAGAGATCTGAAGGAATACCGGTGGCGAAGGCGGCCCCCTGGACAGATACTGACACTCAGATGCGAAAGCGTGGGGAGCAAACAGG
Con_seq_37	Bacteria(100);Deinococcus-Thermus(100);Deinococci(100);Deinococcales(100);Deinococcaceae(100);Deinococcus(100);Deinococcus geothermalis(98);	TACGGAGGGTGCAAGCGTTACCCGGAATCACTGGGCGTAAAGGGCGTGTAGGCGGGAAGCTAAGTCCGACTTTAAAGACCGGGGCTCAACCCCGGGCCTGGGTTGGAGACTGGCTTTCTGGACCTCTGGAGAGGCAACTGGAATTCCTGGTGTAGCGGTGGAATGCGTAGATACCAGGAGGAACACCAATGGCGAAGGCAGGTTGCTGGACAGAAGGTGACGCTGAGGCGCGAAAGTGTGGGGAGCGAACCGG
Con_seq_38	Bacteria(100);Proteobacteria(100);Betaproteobacteria(100);Burkholderiales(100);Comamonadaceae(99);Comamonadaceae_unclassified(99);Comamonadaceae_unclassified(99);	TACGTAGGGTGCGAGCGTTAATCGGAATTACTGGGCGTAAAGCGTGCGCAGGCGGCTTTGCAAGACAGATGTGAAATCCCCGGGCTCAACCTGGGAACTGCATTTGTGACTGCAAGGCTAGAGTGCGGCAGAGGGAGATGGAATTCCGCGTGTAGCAGTGAAATGCGTAGATATGCGGAGGAACACCGATGGCGAAGGCAATCTCCTGGGCCTGCACTGACGCTCATGCACGAAAGCGTGGGGAGCAAACAGG
Con_seq_39	Bacteria(100);Bacteroidetes(100);Sphingobacteriia(100);Sphingobacteriales(100);Chitinophagaceae(100);HM362525_g(95);JF703492_s(95);	TACGGAGGGTGCAAGCGTTATCCGGATTCACTGGGTTTAAAGGGTGTGTAGGCGGATACTTAAGTCAGTGGTGAAATCTCTGGGCTCAACCCGGAAACTGCCATTGATACTATTTATCTTGAATTCTGTTGAGGTGGGCGGAATACATCATGTAGCGGTGAAATGCTTAGATATGATGTAGAACACCGATTGCGAAGGCAGCTCACTAAACAGCGATTGACGCTGAGGCACGAAAGCGTGGGGATCAAACAGG
Con_seq_40	Bacteria(100);Proteobacteria(100);Gammaproteobacteria(100);Cellvibrionales(100);Cellvibrionaceae(100);Cellvibrio(100);JQ427916_s(96);	TACGGAGGGTGCAAGCGTTAATCGGAATTACTGGGCGTAAAGCGCACGTAGGTGGTTTGTTAAGCTAGCTGTGAAATCCCCGGGCTCAACCTGGGCACTGCAGTTAGAACTGGCAAGCTAGAGTAGGGTAGAGGGGTGTGGAATTCCAGGTGTAGCGGTGAAATGCGTAGATATCTGGAGGAACATCAGTGGCGAAGGCGACACCCTGGACTCATACTGACACTGAGGTGCGAAAGCGTGGGGAGCAAACAGG
Con_seq_41	Bacteria(100);Firmicutes(100);Bacilli(100);Bacillales(100);Bacillaceae(100);Anoxybacillus(100);Anoxybacillus flavithermus(100);	TACGTAGGTGGCAAGCGTTGTCCGGAATTATTGGGCGTAAAGCGCGCGCAGGCGGTTCCTTAAGTCTGATGTGAAAGCCCACGGCTCAACCGTGGAGGGTCATTGGAAACTGGGGGACTTGAGTGCAGAAGAGGAGAGCGGAATTCCACGTGTAGCGGTGAAATGCGTAGAGATGTGGAGGAACACCAGTGGCGAAGGCGGCTCTCTGGTCTGTAACTGACGCTGAGGCGCGAAAGCGTGGGGAGCAAACAGG
Con_seq_42	Bacteria(100);Proteobacteria(100);Alphaproteobacteria(100);Rhizobiales(100);Methylobacteriaceae(100);Methylobacterium(100);Methylobacterium jeotgali(99);	TACGAAGGGGGCTAGCGTTGCTCGGAATCACTGGGCGTAAAGGGCGCGTAGGCGGCCTTGTAAGTTGGGGGTGAAAGCCCGTGGCTCAACCACGGAATTGCCTTCGATACTGCTTGGCTTGAGTGTGGTAGAGGTTGGTGGAACTGCGAGTGTAGAGGTGAAATTCGTAGATATTCGCAAGAACACCGGTGGCGAAGGCGGCCAACTGGACCATCACTGACGCTGAGGCGCGAAAGCGTGGGGAGCAAACAGG
Con_seq_43	Bacteria(100);Proteobacteria(100);Gammaproteobacteria(100);Vibrionales(100);Vibrionaceae(100);Photobacterium(97);Photobacterium damselae(97);	TACGGAGGGTGCGAGCGTTAATCGGAATTACTGGGCGTAAAGCGCATGCAGGCGGCCTGTTAAGTCAGATGTGAAAGCCCGGGGCTTAACCTCGGAATTGCATTTGAAACTGGCAGGCTAGAGTCTTGTAGAGGGGGGTAGAATTTCAGGTGTAGCGGTGAAATGCGTAGAGATCTGAAGGAATACCAGTGGCGAAGGCGGCCCCCTGGACAAAGACTGACGCTCAGATGCGAAAGCGTGGGGAGCAAACAGG
Con_seq_44	Bacteria(100);Proteobacteria(100);Alphaproteobacteria(100);Sphingomonadales(98);Sphingomonadaceae(98);Sphingomonadaceae_unclassified(98);Sphingomonadaceae_unclassified(98);	TACGGAGGGGGCTAGCGTTGTTCGGAATTACTGGGCGTAAAGCGTACGTAGGCGGTCTTTTAAGTCAGAGGTGAAAGCCCGGGGCTCAACTCCGGAATTGCCTTTGAAACTGGAAGACTTGAACATGGGAGAGGTAAGTGGAATTCCGAGTGTAGAGGTGAAATTCGTAGATATTCGGAGGAACACCAGTGGCGAAGGCGGCTTACTGGACCATTGTTGACGCTGAGGTACGAAAGCGTGGGGAGCAAACAGG
Con_seq_45	Bacteria(100);Planctomycetes(100);Planctomycetia(100);Planctomycetales(100);Gemmataceae(100);PAC000038_g(98);PAC000038_g_unclassified(98);	GACGAACCGTGCGAACGTTGTTCGGAATCACTGGGCTTAAAGGGCGCGTAGGCGGGTTCGCAAGTCTGTGGTGAAAGCCTCCAGCTTAACTGGAGAAGTGCCGTGGATACTGCGAATCTTGAGGAGGGTAGGGGCGTCTGGAACGGTCGGTGGAGCGGTGAAATGCGTTGATATCGACCGGAACTCCGGTGGCGAAGGCGAGGCGCTGGACCCTTTCTGACGCTGAGGCGCGAAAGCCAGGGGAGCAAACGGG
Con_seq_46	Bacteria(100);Proteobacteria(100);Gammaproteobacteria(100);Pseudomonadales(100);Moraxellaceae(100);Psychrobacter(100);Psychrobacter_unclassified(100);	TACAGAGGGTGCAAGCGTTAATCGGAATTACTGGGCGTAAAGCGAGCGTAGGTGGCTTGATAAGTCAGATGTGAAATCCCCGGGCTTAACCTGGGAACTGCATCTGATACTGTTAGGCTAGAATAGGTGAGAGGAAGGTAGAATTCCAGGTGTAGCGGTGAAATGCGTAGAGATCTGGAGGAATACCGATGGCGAAGGCAGCCTTCTGGCATCATATTGACACTGAGGTTCGAAAGCGTGGGTAGCAAACAGG
Con_seq_47	Bacteria(100);Firmicutes(100);Bacilli(100);Bacillales(100);Staphylococcaceae(100);Staphylococcus(100);Staphylococcus petrasii(98);	TACGTAGGTGGCAAGCGTTATCCGGAATTATTGGGCGTAAAGCGCGCGTAGGTGGTTTTTTAAGTCTGATGTGAAAGCCCACGGCTCAACCGTGGAGGGTCATTGGAAACTGGAAAACTTGAGTGCAGAAGAGGAAAGTGGAATTCCATGTGTAGCGGTGAAATGCGCAGAGATATGGAGGAACACCAGTGGCGAAGGCGACTTTCTGGTCTGTAACTGACGCTGATGTGCGAAAGCGTGGGGATCAAACAGG

## Sheet: TableS3_MAGs list
user_genome	metagenomic sample	cultivable or uncultivable	completeness	contamination	coverage	red_value	classification	fastani_reference	fastani_reference_radius	fastani_taxonomy	fastani_ani	fastani_af	closest_placement_reference	closest_placement_radius	closest_placement_taxonomy	closest_placement_ani	closest_placement_af	pplacer_taxonomy	classification_method	note	other_related_references(genome_id,species_name,radius,ANI,AF)	msa_percent
ASGE1bin.1	XM1_ASGE1	cultivable	93.47	4.738	58.153	0.990161	d__Bacteria;p__Bacteroidota;c__Bacteroidia;o__Flavobacteriales;f__Weeksellaceae;g__Cloacibacterium;s__	N/A	N/A	N/A	N/A	N/A	N/A	N/A	N/A	N/A	N/A	d__Bacteria;p__Bacteroidota;c__Bacteroidia;o__Flavobacteriales;f__Weeksellaceae;g__Cloacibacterium;s__	taxonomic classification defined by topology and ANI	N/A	GCA_002337005.1, s__Cloacibacterium sp002337005, 95.0, 84.28, 0.69; GCA_014645495.1, s__Cloacibacterium rupense, 95.0, 83.51, 0.69; GCF_003860565.1, s__Cloacibacterium normanense, 95.0, 82.44, 0.58; GCA_002422665.1, s__Cloacibacterium sp002422665, 95.0, 82.41, 0.54	73.5
ASGE1bin.10	XM1_ASGE1	cultivable	97.04	0.389	30.061	0.978709	d__Bacteria;p__Proteobacteria;c__Gammaproteobacteria;o__Burkholderiales;f__Burkholderiaceae;g__Hydrogenophaga;s__	N/A	N/A	N/A	N/A	N/A	N/A	N/A	N/A	N/A	N/A	d__Bacteria;p__Proteobacteria;c__Gammaproteobacteria;o__Burkholderiales;f__Burkholderiaceae;g__Hydrogenophaga;s__	taxonomic classification defined by topology and ANI	N/A	GCF_001592285.1, s__Hydrogenophaga pseudoflava, 95.0, 86.53, 0.71; GCF_001571145.1, s__Hydrogenophaga flava, 95.0, 86.51, 0.71; GCA_003509765.1, s__Hydrogenophaga sp003509765, 95.0, 83.45, 0.63; GCF_002001205.1, s__Hydrogenophaga sp002001205, 95.0, 83.37, 0.67; GCA_001770905.1, s__Hydrogenophaga sp001770905, 95.0, 83.35, 0.62; GCA_013823655.1, s__Hydrogenophaga sp013823655, 95.0, 83.35, 0.66; GCA…	95.91
ASGE1bin.11	XM1_ASGE1	cultivable	53.44	4.31	45.2973	N/A	d__Bacteria;p__Proteobacteria;c__Gammaproteobacteria;o__Burkholderiales;f__Rhodocyclaceae;g__Azonexus;s__Azonexus sp002425245	GCA_002425245.1	95	d__Bacteria;p__Proteobacteria;c__Gammaproteobacteria;o__Burkholderiales;f__Rhodocyclaceae;g__Azonexus;s__Azonexus sp002425245	97.57	0.73	GCA_002425245.1	95	d__Bacteria;p__Proteobacteria;c__Gammaproteobacteria;o__Burkholderiales;f__Rhodocyclaceae;g__Azonexus;s__Azonexus sp002425245	97.57	0.73	d__Bacteria;p__Proteobacteria;c__Gammaproteobacteria;o__Burkholderiales;f__Rhodocyclaceae;g__Azonexus;s__	taxonomic classification defined by topology and ANI	topological placement and ANI have congruent species assignments	GCF_000429605.1, s__Azonexus hydrophilus, 95.0, 88.16, 0.7; GCA_002470165.1, s__Azonexus sp002470165, 95.0, 88.03, 0.51; GCF_003634965.1, s__Azonexus fungiphilus, 95.0, 86.61, 0.68; GCF_001956855.1, s__Azonexus hydrophilus_A, 95.0, 84.94, 0.67; GCA_008933675.1, s__Azonexus sp008933675, 95.0, 83.73, 0.52; GCF_009469615.1, s__Azonexus sp009469615, 95.0, 83.51, 0.51; GCF_009469585.1, s__Azonexus sp0…	48.08
ASGE1bin.12	XM1_ASGE1	cultivable	54.82	1.411	5.74386	0.987372	d__Bacteria;p__Proteobacteria;c__Alphaproteobacteria;o__Rhizobiales;f__Aestuariivirgaceae;g__Aestuariivirga;s__	N/A	N/A	N/A	N/A	N/A	GCF_003234965.1	95	d__Bacteria;p__Proteobacteria;c__Alphaproteobacteria;o__Rhizobiales;f__Aestuariivirgaceae;g__Aestuariivirga;s__Aestuariivirga litoralis	87.53	0.83	d__Bacteria;p__Proteobacteria;c__Alphaproteobacteria;o__Rhizobiales;f__Aestuariivirgaceae;g__Aestuariivirga;s__	taxonomic classification defined by topology and ANI	N/A	GCA_903930095.1, s__Aestuariivirga sp903930095, 95.0, 81.81, 0.54; GCA_900298995.1, s__Aestuariivirga sp900298995, 95.0, 80.87, 0.55; GCA_012032065.1, s__Aestuariivirga sp012032065, 95.0, 77.78, 0.28; GCA_902826365.1, s__Aestuariivirga sp902826365, 95.0, 77.55, 0.22; GCA_014380505.1, s__Aestuariivirga sp014380505, 95.0, 77.27, 0.2; GCA_009885825.1, s__Aestuariivirga sp009885825, 95.0, 77.14, 0.15…	44.21
ASGE1bin.13	XM1_ASGE1	cultivable	50.23	0.203	3.86201	0.948851	d__Bacteria;p__Campylobacterota;c__Campylobacteria;o__Campylobacterales;f__Arcobacteraceae;g__Aliarcobacter;s__	N/A	N/A	N/A	N/A	N/A	N/A	N/A	N/A	N/A	N/A	d__Bacteria;p__Campylobacterota;c__Campylobacteria;o__Campylobacterales;f__Arcobacteraceae;g__Aliarcobacter;s__	taxonomic classification defined by topology and ANI	N/A	GCF_003544915.1, s__Aliarcobacter ellisii, 95.0, 85.55, 0.78; GCF_013201725.1, s__Aliarcobacter defluvii, 95.0, 84.72, 0.73; GCF_013201935.1, s__Aliarcobacter cloacae, 95.0, 84.4, 0.77; GCF_013177635.1, s__Aliarcobacter aquimarinus, 95.0, 84.29, 0.73; GCF_003544815.1, s__Aliarcobacter suis, 95.0, 83.92, 0.7; GCF_900187115.1, s__Aliarcobacter butzleri, 95.0, 83.79, 0.61; GCF_013177675.1, s__Aliarc…	42.09
ASGE1bin.14	XM1_ASGE1	cultivable	95.82	0	12.6189	N/A	d__Bacteria;p__Proteobacteria;c__Gammaproteobacteria;o__Burkholderiales;f__Burkholderiaceae;g__NBD-18;s__NBD-18 sp003507735	GCF_010499255.1	95	d__Bacteria;p__Proteobacteria;c__Gammaproteobacteria;o__Burkholderiales;f__Burkholderiaceae;g__NBD-18;s__NBD-18 sp003507735	99.08	0.94	GCF_010499255.1	95	d__Bacteria;p__Proteobacteria;c__Gammaproteobacteria;o__Burkholderiales;f__Burkholderiaceae;g__NBD-18;s__NBD-18 sp003507735	99.08	0.94	d__Bacteria;p__Proteobacteria;c__Gammaproteobacteria;o__Burkholderiales;f__Burkholderiaceae;g__NBD-18;s__	taxonomic classification defined by topology and ANI	topological placement and ANI have congruent species assignments	GCA_903958565.1, s__NBD-18 sp903958565, 95.0, 77.53, 0.12; GCA_903929925.1, s__NBD-18 sp903929925, 95.0, 77.26, 0.12; GCA_903821335.1, s__NBD-18 sp903821335, 95.0, 77.16, 0.14; GCA_002292845.1, s__NBD-18 sp002292845, 95.0, 77.15, 0.1; GCA_903847325.1, s__NBD-18 sp903847325, 95.0, 77.11, 0.18; GCA_903865015.1, s__NBD-18 sp903865015, 95.0, 77.01, 0.17; GCA_903903735.1, s__NBD-18 sp903903735, 95.0, …	82.85
ASGE1bin.15	XM1_ASGE1	cultivable	88.55	3.333	10.0593	0.881947	d__Bacteria;p__Proteobacteria;c__Gammaproteobacteria;o__Enterobacterales;f__Aeromonadaceae;g__;s__	N/A	N/A	N/A	N/A	N/A	N/A	N/A	N/A	N/A	N/A	d__Bacteria;p__Proteobacteria;c__Gammaproteobacteria;o__Enterobacterales;f__Aeromonadaceae;g__;s__	taxonomic novelty determined using RED	N/A	N/A	79.53
ASGE1bin.17	XM1_ASGE1	cultivable	56.89	0	41.9823	0.951272	d__Bacteria;p__Proteobacteria;c__Gammaproteobacteria;o__Burkholderiales;f__Rhodocyclaceae;g__CAIQBG01;s__	N/A	N/A	N/A	N/A	N/A	N/A	N/A	N/A	N/A	N/A	d__Bacteria;p__Proteobacteria;c__Gammaproteobacteria;o__Burkholderiales;f__Rhodocyclaceae;g__;s__	taxonomic novelty determined using RED	N/A	N/A	50.03
ASGE1bin.18	XM1_ASGE1	cultivable	91.12	5.731	10.9292	N/A	d__Bacteria;p__Campylobacterota;c__Campylobacteria;o__Campylobacterales;f__Arcobacteraceae;g__Aliarcobacter;s__Aliarcobacter cryaerophilus_A	GCF_014352935.1	95	d__Bacteria;p__Campylobacterota;c__Campylobacteria;o__Campylobacterales;f__Arcobacteraceae;g__Aliarcobacter;s__Aliarcobacter cryaerophilus_A	98.08	0.93	GCF_014352935.1	95	d__Bacteria;p__Campylobacterota;c__Campylobacteria;o__Campylobacterales;f__Arcobacteraceae;g__Aliarcobacter;s__Aliarcobacter cryaerophilus_A	98.08	0.93	d__Bacteria;p__Campylobacterota;c__Campylobacteria;o__Campylobacterales;f__Arcobacteraceae;g__Aliarcobacter;s__	taxonomic classification defined by topology and ANI	topological placement and ANI have congruent species assignments	GCF_002993025.1, s__Aliarcobacter cryaerophilus_B, 95.0, 93.11, 0.9; GCF_003660105.1, s__Aliarcobacter cryaerophilus, 95.0, 93.01, 0.93; GCF_003355515.1, s__Aliarcobacter trophiarum, 95.0, 86.57, 0.85; GCF_003544835.1, s__Aliarcobacter skirrowii, 95.0, 86.31, 0.79; GCF_013201705.1, s__Aliarcobacter faecis, 95.0, 83.76, 0.82; GCF_013372265.1, s__Aliarcobacter cibarius, 95.0, 83.27, 0.81; GCF_00429…	79.29
ASGE1bin.19	XM1_ASGE1	cultivable	99.07	0.437	104.478	N/A	d__Bacteria;p__Proteobacteria;c__Alphaproteobacteria;o__Sphingomonadales;f__Sphingomonadaceae;g__Novosphingobium;s__Novosphingobium colocasiae	GCA_014652555.1	95	d__Bacteria;p__Proteobacteria;c__Alphaproteobacteria;o__Sphingomonadales;f__Sphingomonadaceae;g__Novosphingobium;s__Novosphingobium colocasiae	95.86	0.81	GCA_014652555.1	95	d__Bacteria;p__Proteobacteria;c__Alphaproteobacteria;o__Sphingomonadales;f__Sphingomonadaceae;g__Novosphingobium;s__Novosphingobium colocasiae	95.86	0.81	d__Bacteria;p__Proteobacteria;c__Alphaproteobacteria;o__Sphingomonadales;f__Sphingomonadaceae;g__Novosphingobium;s__	taxonomic classification defined by topology and ANI	topological placement and ANI have congruent species assignments	GCF_001590985.1, s__Novosphingobium naphthalenivorans, 95.0, 81.61, 0.48; GCF_900113255.1, s__Novosphingobium sp900113255, 95.0, 80.87, 0.47; GCF_006874585.1, s__Novosphingobium sp006874585, 95.0, 80.7, 0.49; GCF_007993975.1, s__Novosphingobium barchaimii_B, 95.0, 80.62, 0.43; GCF_000281975.1, s__Novosphingobium sp000281975, 95.0, 80.6, 0.45; GCF_002149965.1, s__Novosphingobium panipatense, 95.0,…	98.93
ASGE1bin.2	XM1_ASGE1	cultivable	99.13	0.324	24.0396	0.982248	d__Bacteria;p__Proteobacteria;c__Alphaproteobacteria;o__Caulobacterales;f__Caulobacteraceae;g__Brevundimonas;s__	N/A	N/A	N/A	N/A	N/A	N/A	N/A	N/A	N/A	N/A	d__Bacteria;p__Proteobacteria;c__Alphaproteobacteria;o__Caulobacterales;f__Caulobacteraceae;g__Brevundimonas;s__	taxonomic classification defined by topology and ANI	N/A	GCA_003248925.1, s__Brevundimonas sp003248925, 95.0, 88.19, 0.78; GCA_002479325.1, s__Brevundimonas sp002479325, 95.0, 87.89, 0.73; GCF_011064825.1, s__Brevundimonas mediterranea_A, 95.0657, 85.75, 0.74; GCF_004614235.1, s__Brevundimonas intermedia, 95.0, 85.56, 0.75; GCA_002434505.1, s__Brevundimonas sp002434505, 95.0, 85.48, 0.73; GCF_002157625.1, s__Brevundimonas sp002157625, 95.0, 85.46, 0.71…	95.35
ASGE1bin.20	XM1_ASGE1	cultivable	98.34	1.913	27.2224	0.979174	d__Bacteria;p__Proteobacteria;c__Gammaproteobacteria;o__Burkholderiales;f__Rhodocyclaceae;g__Zoogloea;s__	N/A	N/A	N/A	N/A	N/A	GCF_009469605.1	95	d__Bacteria;p__Proteobacteria;c__Gammaproteobacteria;o__Burkholderiales;f__Rhodocyclaceae;g__Zoogloea;s__Zoogloea sp009469605	87.13	0.78	d__Bacteria;p__Proteobacteria;c__Gammaproteobacteria;o__Burkholderiales;f__Rhodocyclaceae;g__Zoogloea;s__	taxonomic classification defined by topology and ANI	N/A	GCF_006539865.1, s__Zoogloea ramigera, 95.0, 84.92, 0.68; GCA_009026175.1, s__Zoogloea sp009026175, 95.0, 83.14, 0.59; GCF_012927165.1, s__Zoogloea sp012927165, 95.0, 82.99, 0.66; GCF_002028455.1, s__Zoogloea sp002028455, 95.0, 82.98, 0.64; GCF_008107625.1, s__Zoogloea oleivorans, 95.0, 82.92, 0.66; GCA_008011925.1, s__Zoogloea sp008011925, 95.0, 81.38, 0.56	75.62
ASGE1bin.21	XM1_ASGE1	cultivable	69.82	1.724	8.46933	N/A	d__Bacteria;p__Proteobacteria;c__Gammaproteobacteria;o__Enterobacterales;f__Enterobacteriaceae;g__Escherichia;s__Escherichia flexneri	GCF_002950215.1	97.0028	d__Bacteria;p__Proteobacteria;c__Gammaproteobacteria;o__Enterobacterales;f__Enterobacteriaceae;g__Escherichia;s__Escherichia flexneri	97.67	0.84	GCF_002949675.1	97.0028	d__Bacteria;p__Proteobacteria;c__Gammaproteobacteria;o__Enterobacterales;f__Enterobacteriaceae;g__Escherichia;s__Escherichia dysenteriae	96.92	0.78	d__Bacteria;p__Proteobacteria;c__Gammaproteobacteria;o__Enterobacterales;f__Enterobacteriaceae;g__Escherichia;s__	ANI	topological placement and ANI have incongruent species assignments	GCF_000026325.1, s__Escherichia coli_D, 96.9551, 97.22, 0.9; GCF_003697165.2, s__Escherichia coli, 96.8144, 96.75, 0.87; GCA_003018335.1, s__Escherichia coli_C, 96.1333, 95.94, 0.89; GCF_002965065.1, s__Escherichia sp002965065, 95.0, 94.28, 0.72; GCF_004211955.1, s__Escherichia sp004211955, 95.0, 92.65, 0.82; GCF_000208585.1, s__Escherichia sp000208585, 95.0, 92.38, 0.81; GCF_005843885.1, s__Esch…	58.61
ASGE1bin.22	XM1_ASGE1	cultivable	100	0.191	8.69651	0.993295	d__Bacteria;p__Proteobacteria;c__Gammaproteobacteria;o__Pseudomonadales;f__Moraxellaceae;g__Acinetobacter;s__	N/A	N/A	N/A	N/A	N/A	GCA_001626925.1	95	d__Bacteria;p__Proteobacteria;c__Gammaproteobacteria;o__Pseudomonadales;f__Moraxellaceae;g__Acinetobacter;s__Acinetobacter sp001626925	91.37	0.84	d__Bacteria;p__Proteobacteria;c__Gammaproteobacteria;o__Pseudomonadales;f__Moraxellaceae;g__Acinetobacter;s__	taxonomic classification defined by topology and ANI	N/A	GCF_900096915.1, s__Acinetobacter marinus, 95.0, 86.08, 0.82; GCF_000368825.1, s__Acinetobacter ursingii, 95.0, 78.82, 0.23; GCF_000632455.1, s__Acinetobacter sp000632455, 95.0, 78.77, 0.21; GCF_000488275.1, s__Acinetobacter brisouii, 95.0, 78.68, 0.25; GCF_000400715.1, s__Acinetobacter sp000400715, 95.0, 78.64, 0.25; GCF_000368765.1, s__Acinetobacter junii, 95.0, 78.64, 0.21; GCF_006757745.1, s_…	99.11
ASGE1bin.23	XM1_ASGE1	cultivable	93.81	5.882	10.3267	0.984582	d__Bacteria;p__Proteobacteria;c__Gammaproteobacteria;o__Burkholderiales;f__Burkholderiaceae;g__Alicycliphilus;s__	N/A	N/A	N/A	N/A	N/A	GCF_000204645.1	95	d__Bacteria;p__Proteobacteria;c__Gammaproteobacteria;o__Burkholderiales;f__Burkholderiaceae;g__Alicycliphilus;s__Alicycliphilus denitrificans	86.31	0.72	d__Bacteria;p__Proteobacteria;c__Gammaproteobacteria;o__Burkholderiales;f__Burkholderiaceae;g__;s__	taxonomic classification defined by topology and ANI	N/A	N/A	81.02
ASGE1bin.25	XM1_ASGE1	cultivable	96.07	0.735	17.8979	0.992755	d__Bacteria;p__Bacteroidota;c__Bacteroidia;o__Flavobacteriales;f__Weeksellaceae;g__Kaistella;s__	N/A	N/A	N/A	N/A	N/A	GCA_002426785.1	95	d__Bacteria;p__Bacteroidota;c__Bacteroidia;o__Flavobacteriales;f__Weeksellaceae;g__Kaistella;s__Kaistella sp002426785	94.3	0.78	d__Bacteria;p__Bacteroidota;c__Bacteroidia;o__Flavobacteriales;f__Weeksellaceae;g__Kaistella;s__	taxonomic classification defined by topology and ANI	N/A	GCF_001403755.1, s__Kaistella sp001403755, 95.0, 78.98, 0.41; GCF_000735695.2, s__Kaistella haifensis, 95.0, 78.82, 0.44; GCF_001045435.1, s__Kaistella koreensis, 95.0, 78.75, 0.47; GCF_002205795.1, s__Kaistella sp002205795, 95.0, 78.58, 0.37; GCF_002197835.1, s__Kaistella sp002197835, 95.0, 78.28, 0.41; GCA_002453895.1, s__Kaistella sp002453895, 95.0, 78.21, 0.36; GCF_900156725.1, s__Kaistella c…	81.08
ASGE1bin.26	XM1_ASGE1	cultivable	65.41	3.224	8.94467	0.974166	d__Bacteria;p__Proteobacteria;c__Gammaproteobacteria;o__Burkholderiales;f__Burkholderiaceae;g__Ramlibacter;s__	N/A	N/A	N/A	N/A	N/A	GCF_007833165.1	95	d__Bacteria;p__Proteobacteria;c__Gammaproteobacteria;o__Burkholderiales;f__Burkholderiaceae;g__Ramlibacter;s__Ramlibacter sp007833165	82.59	0.69	d__Bacteria;p__Proteobacteria;c__Gammaproteobacteria;o__Burkholderiales;f__Burkholderiaceae;g__Ramlibacter;s__	taxonomic classification defined by topology and ANI	N/A	GCF_013087525.1, s__Ramlibacter sp013087525, 95.0, 83.39, 0.67; GCF_001424545.1, s__Ramlibacter sp001424545, 95.0, 83.19, 0.61; GCF_000215705.1, s__Ramlibacter tataouinensis, 95.0, 83.13, 0.59; GCA_004144865.1, s__Ramlibacter sp004144865, 95.0, 82.8, 0.61; GCA_013127575.1, s__Ramlibacter sp013127575, 95.0, 82.8, 0.65; GCF_004681975.1, s__Ramlibacter sp004681975, 95.0, 82.78, 0.59; GCA_013697775.1…	47.05
ASGE1bin.27	XM1_ASGE1	cultivable	95.76	2.95	24.0786	0.963745	d__Bacteria;p__Proteobacteria;c__Alphaproteobacteria;o__Rhodobacterales;f__Rhodobacteraceae;g__Albidovulum;s__	N/A	N/A	N/A	N/A	N/A	GCA_008933605.1	95	d__Bacteria;p__Proteobacteria;c__Alphaproteobacteria;o__Rhodobacterales;f__Rhodobacteraceae;g__Albidovulum;s__Albidovulum sp008933605	84.95	0.67	d__Bacteria;p__Proteobacteria;c__Alphaproteobacteria;o__Rhodobacterales;f__Rhodobacteraceae;g__Albidovulum;s__	taxonomic classification defined by topology and ANI	N/A	GCA_011620265.1, s__Albidovulum sp011620265, 95.0, 83.06, 0.64; GCA_002280515.1, s__Albidovulum sp002280515, 95.0, 82.63, 0.67; GCA_002841115.1, s__Albidovulum sp002841115, 95.0, 81.62, 0.55; GCF_002973535.1, s__Albidovulum denitrificans, 95.0, 80.61, 0.62; GCA_002440625.1, s__Albidovulum sp002440625, 95.0, 80.37, 0.49; GCF_900302475.1, s__Albidovulum aquaemixtae, 95.0, 80.02, 0.55; GCF_002927635…	82.71
ASGE1bin.28	XM1_ASGE1	cultivable	57.61	2.072	7.42471	0.880566	d__Bacteria;p__Proteobacteria;c__Alphaproteobacteria;o__Acetobacterales;f__Acetobacteraceae;g__;s__	N/A	N/A	N/A	N/A	N/A	N/A	N/A	N/A	N/A	N/A	d__Bacteria;p__Proteobacteria;c__Alphaproteobacteria;o__Acetobacterales;f__Acetobacteraceae;g__;s__	taxonomic novelty determined using RED	N/A	N/A	51.54
ASGE1bin.29	XM1_ASGE1	cultivable	94.8	1.453	56.1843	N/A	d__Bacteria;p__Proteobacteria;c__Gammaproteobacteria;o__Pseudomonadales;f__Pseudomonadaceae;g__Pseudomonas;s__Pseudomonas panipatensis	GCF_900099785.1	95	d__Bacteria;p__Proteobacteria;c__Gammaproteobacteria;o__Pseudomonadales;f__Pseudomonadaceae;g__Pseudomonas;s__Pseudomonas panipatensis	99.17	0.89	GCF_900099785.1	95	d__Bacteria;p__Proteobacteria;c__Gammaproteobacteria;o__Pseudomonadales;f__Pseudomonadaceae;g__Pseudomonas;s__Pseudomonas panipatensis	99.17	0.89	d__Bacteria;p__Proteobacteria;c__Gammaproteobacteria;o__Pseudomonadales;f__Pseudomonadaceae;g__Pseudomonas;s__	taxonomic classification defined by topology and ANI	topological placement and ANI have congruent species assignments	GCF_900187975.1, s__Pseudomonas delhiensis, 95.078, 88.13, 0.77; GCF_900112375.1, s__Pseudomonas citronellolis, 95.078, 88.03, 0.8; GCF_000689415.1, s__Pseudomonas knackmussii, 95.0, 87.29, 0.81; GCF_900103845.1, s__Pseudomonas jinjuensis, 95.0, 85.86, 0.68; GCF_000349845.1, s__Pseudomonas sp000349845, 95.0, 85.83, 0.72; GCA_002452115.1, s__Pseudomonas nitroreducens_B, 95.0, 85.69, 0.66; GCF_0142…	88.72
ASGE1bin.3	XM1_ASGE1	cultivable	71.49	2.286	7.9234	0.9522	d__Bacteria;p__Proteobacteria;c__Alphaproteobacteria;o__Sphingomonadales;f__Sphingomonadaceae;g__Novosphingobium;s__	N/A	N/A	N/A	N/A	N/A	N/A	N/A	N/A	N/A	N/A	d__Bacteria;p__Proteobacteria;c__Alphaproteobacteria;o__Sphingomonadales;f__Sphingomonadaceae;g__Novosphingobium;s__	ANI	N/A	GCF_002855555.1, s__Novosphingobium sp002855555, 95.0, 79.64, 0.46; GCF_014230315.1, s__Novosphingobium flavum, 95.0, 79.48, 0.43; GCA_004211435.1, s__Novosphingobium sp004211435, 95.0, 79.34, 0.48; GCF_014230355.1, s__Novosphingobium piscinae, 95.0, 79.31, 0.42; GCF_014230305.1, s__Novosphingobium flavum_A, 95.0, 79.23, 0.45; GCF_900113255.1, s__Novosphingobium sp900113255, 95.0, 79.17, 0.43; GC…	51.18
ASGE1bin.30	XM1_ASGE1	cultivable	87.14	8.62	11.3827	0.963313	d__Bacteria;p__Proteobacteria;c__Alphaproteobacteria;o__Rhodobacterales;f__Rhodobacteraceae;g__Albidovulum;s__	N/A	N/A	N/A	N/A	N/A	GCA_008933605.1	95	d__Bacteria;p__Proteobacteria;c__Alphaproteobacteria;o__Rhodobacterales;f__Rhodobacteraceae;g__Albidovulum;s__Albidovulum sp008933605	84.6	0.7	d__Bacteria;p__Proteobacteria;c__Alphaproteobacteria;o__Rhodobacterales;f__Rhodobacteraceae;g__Albidovulum;s__	taxonomic classification defined by topology and ANI	N/A	GCA_011620265.1, s__Albidovulum sp011620265, 95.0, 82.94, 0.66; GCA_002280515.1, s__Albidovulum sp002280515, 95.0, 82.7, 0.7; GCA_002841115.1, s__Albidovulum sp002841115, 95.0, 81.36, 0.57; GCF_002973535.1, s__Albidovulum denitrificans, 95.0, 80.76, 0.62; GCA_002440625.1, s__Albidovulum sp002440625, 95.0, 80.3, 0.52; GCF_900302475.1, s__Albidovulum aquaemixtae, 95.0, 79.98, 0.57; GCF_002927635.1,…	71.93
ASGE1bin.31	XM1_ASGE1	cultivable	98.67	0	44.1322	N/A	d__Bacteria;p__Proteobacteria;c__Gammaproteobacteria;o__Pseudomonadales;f__Moraxellaceae;g__Acinetobacter;s__Acinetobacter johnsonii	GCF_000368045.1	95	d__Bacteria;p__Proteobacteria;c__Gammaproteobacteria;o__Pseudomonadales;f__Moraxellaceae;g__Acinetobacter;s__Acinetobacter johnsonii	95.93	0.9	GCF_000368045.1	95	d__Bacteria;p__Proteobacteria;c__Gammaproteobacteria;o__Pseudomonadales;f__Moraxellaceae;g__Acinetobacter;s__Acinetobacter johnsonii	95.93	0.9	d__Bacteria;p__Proteobacteria;c__Gammaproteobacteria;o__Pseudomonadales;f__Moraxellaceae;g__Acinetobacter;s__	taxonomic classification defined by topology and ANI	topological placement and ANI have congruent species assignments	GCF_002165305.2, s__Acinetobacter sp002165305, 95.0, 93.27, 0.91; GCF_002135205.1, s__Acinetobacter sp002135205, 95.0, 89.71, 0.86; GCF_003105055.1, s__Acinetobacter sp003105055, 95.0, 82.01, 0.51; GCF_004331175.1, s__Acinetobacter sp004331175, 95.0, 81.82, 0.53; GCF_004331035.1, s__Acinetobacter sp004331035, 95.0, 81.81, 0.5; GCF_004331255.1, s__Acinetobacter sp004331255, 95.0, 81.79, 0.51; GCF_…	97.64
ASGE1bin.32	XM1_ASGE1	cultivable	94.16	0.353	14.3454	0.98776	d__Bacteria;p__Bacteroidota;c__Bacteroidia;o__Flavobacteriales;f__Flavobacteriaceae;g__Flavobacterium;s__	N/A	N/A	N/A	N/A	N/A	N/A	N/A	N/A	N/A	N/A	d__Bacteria;p__Bacteroidota;c__Bacteroidia;o__Flavobacteriales;f__Flavobacteriaceae;g__Flavobacterium;s__	taxonomic classification defined by topology and ANI	N/A	GCF_000686885.1, s__Flavobacterium sasangense, 95.0, 91.66, 0.86; GCF_003259835.1, s__Flavobacterium aquaticum, 95.0, 89.75, 0.83; GCA_002422095.1, s__Flavobacterium sp002422095, 95.0, 89.6, 0.7; GCA_002421645.1, s__Flavobacterium sp002421645, 95.0, 89.05, 0.73; GCA_003963025.1, s__Flavobacterium sp003963025, 95.0, 88.8, 0.72; GCA_003497625.1, s__Flavobacterium sp003497625, 95.0, 87.78, 0.78; GCF…	94.52
ASGE1bin.33	XM1_ASGE1	cultivable	99.24	0.316	17.3795	N/A	d__Bacteria;p__Proteobacteria;c__Alphaproteobacteria;o__Rhizobiales;f__Xanthobacteraceae;g__Xanthobacter;s__Xanthobacter sp000702385	GCF_000702385.1	95	d__Bacteria;p__Proteobacteria;c__Alphaproteobacteria;o__Rhizobiales;f__Xanthobacteraceae;g__Xanthobacter;s__Xanthobacter sp000702385	97.42	0.91	GCF_000702385.1	95	d__Bacteria;p__Proteobacteria;c__Alphaproteobacteria;o__Rhizobiales;f__Xanthobacteraceae;g__Xanthobacter;s__Xanthobacter sp000702385	97.42	0.91	d__Bacteria;p__Proteobacteria;c__Alphaproteobacteria;o__Rhizobiales;f__Xanthobacteraceae;g__Xanthobacter;s__	taxonomic classification defined by topology and ANI	topological placement and ANI have congruent species assignments	GCF_012932745.1, s__Xanthobacter sp012932745, 95.0, 93.44, 0.85; GCF_012275355.1, s__Xanthobacter sp012275355, 95.0, 92.02, 0.82; GCF_008364685.1, s__Xanthobacter sp008364685, 95.0, 85.13, 0.64; GCF_000017645.1, s__Xanthobacter autotrophicus, 95.0, 85.0, 0.62; GCF_005871085.1, s__Xanthobacter autotrophicus_A, 95.0, 84.93, 0.65; GCF_003667445.1, s__Xanthobacter tagetidis, 95.0, 83.22, 0.58	98.31
ASGE1bin.34	XM1_ASGE1	cultivable	98.65	2.988	31.2138	N/A	d__Bacteria;p__Proteobacteria;c__Gammaproteobacteria;o__Enterobacterales;f__Enterobacteriaceae;g__Yokenella;s__Yokenella regensburgei	GCF_000735455.1	95	d__Bacteria;p__Proteobacteria;c__Gammaproteobacteria;o__Enterobacterales;f__Enterobacteriaceae;g__Yokenella;s__Yokenella regensburgei	99.07	0.92	GCF_000735455.1	95	d__Bacteria;p__Proteobacteria;c__Gammaproteobacteria;o__Enterobacterales;f__Enterobacteriaceae;g__Yokenella;s__Yokenella regensburgei	99.07	0.92	d__Bacteria;p__Proteobacteria;c__Gammaproteobacteria;o__Enterobacterales;f__Enterobacteriaceae;g__;s__	taxonomic classification defined by topology and ANI	topological placement and ANI have congruent species assignments	N/A	79.02
ASGE1bin.35	XM1_ASGE1	cultivable	99.5	0.985	9.2214	0.948865	d__Bacteria;p__Bacteroidota;c__Bacteroidia;o__Chitinophagales;f__Chitinophagaceae;g__Ferruginibacter;s__	N/A	N/A	N/A	N/A	N/A	GCA_002336815.1	95	d__Bacteria;p__Bacteroidota;c__Bacteroidia;o__Chitinophagales;f__Chitinophagaceae;g__Ferruginibacter;s__Ferruginibacter sp002336815	76.39	0.12	d__Bacteria;p__Bacteroidota;c__Bacteroidia;o__Chitinophagales;f__Chitinophagaceae;g__Ferruginibacter;s__	taxonomic classification defined by topology and ANI	N/A	GCA_002400445.1, s__Ferruginibacter sp002400445, 95.0, 76.76, 0.04; GCA_002343985.1, s__Ferruginibacter sp002343985, 95.0, 76.59, 0.12; GCA_903837525.1, s__Ferruginibacter sp903837525, 95.0, 76.53, 0.02; GCA_001898465.1, s__Ferruginibacter sp001898465, 95.0, 76.39, 0.03; GCA_003455235.1, s__Ferruginibacter sp003455235, 95.0, 76.3, 0.12; GCA_014379905.1, s__Ferruginibacter sp014379905, 95.0, 76.2,…	97.8
ASGE1bin.36	XM1_ASGE1	cultivable	93.03	2.694	11.2377	0.857015	d__Bacteria;p__Proteobacteria;c__Alphaproteobacteria;o__Micropepsales;f__Micropepsaceae;g__UBA2784;s__	N/A	N/A	N/A	N/A	N/A	GCA_002352285.1	95	d__Bacteria;p__Proteobacteria;c__Alphaproteobacteria;o__Micropepsales;f__Micropepsaceae;g__UBA2784;s__UBA2784 sp002352285	77.56	0.22	d__Bacteria;p__Proteobacteria;c__Alphaproteobacteria;o__Micropepsales;f__Micropepsaceae;g__;s__	taxonomic classification defined by topology and ANI	N/A	N/A	89.36
ASGE1bin.37	XM1_ASGE1	cultivable	51.03	5.263	6.59097	N/A	d__Bacteria;p__Proteobacteria;c__Gammaproteobacteria;o__Burkholderiales;f__Rhodocyclaceae;g__Thauera;s__Thauera aminoaromatica	GCF_000310185.1	95	d__Bacteria;p__Proteobacteria;c__Gammaproteobacteria;o__Burkholderiales;f__Rhodocyclaceae;g__Thauera;s__Thauera aminoaromatica	98.65	0.92	GCF_000310185.1	95	d__Bacteria;p__Proteobacteria;c__Gammaproteobacteria;o__Burkholderiales;f__Rhodocyclaceae;g__Thauera;s__Thauera aminoaromatica	98.65	0.92	d__Bacteria;p__Proteobacteria;c__Gammaproteobacteria;o__Burkholderiales;f__Rhodocyclaceae;g__Thauera;s__	taxonomic classification defined by topology and ANI	topological placement and ANI have congruent species assignments	GCF_000310225.1, s__Thauera phenylacetica, 95.0, 91.56, 0.84; GCA_003963015.1, s__Thauera sp003963015, 95.0, 91.5, 0.84; GCA_002422685.1, s__Thauera sp002422685, 95.0, 85.71, 0.71; GCA_003446655.1, s__Thauera sp003446655, 95.0, 85.13, 0.6; GCF_001922305.1, s__Thauera chlorobenzoica, 95.0, 83.65, 0.64; GCF_001051995.2, s__Thauera humireducens, 95.0, 83.63, 0.71; GCF_002245655.1, s__Thauera propion…	42.6
ASGE1bin.39	XM1_ASGE1	cultivable	86.76	6.823	45.0512	0.990558	d__Bacteria;p__Proteobacteria;c__Gammaproteobacteria;o__Enterobacterales;f__Aeromonadaceae;g__Tolumonas;s__	N/A	N/A	N/A	N/A	N/A	GCA_008015085.1	95	d__Bacteria;p__Proteobacteria;c__Gammaproteobacteria;o__Enterobacterales;f__Aeromonadaceae;g__Tolumonas;s__Tolumonas sp008015085	97.98	0.55	d__Bacteria;p__Proteobacteria;c__Gammaproteobacteria;o__Enterobacterales;f__Aeromonadaceae;g__Tolumonas;s__	taxonomic classification defined by topology and ANI	N/A	GCF_014202415.1, s__Tolumonas osonensis, 95.0, 83.05, 0.51; GCF_000023065.1, s__Tolumonas auensis, 95.0, 82.07, 0.51; GCF_000527035.1, s__Tolumonas lignilytica, 95.0, 81.94, 0.47; GCA_903931645.1, s__Tolumonas sp903931645, 95.0, 81.13, 0.33; GCA_003251455.1, s__Tolumonas sp003251455, 95.0, 79.02, 0.22	79.59
ASGE1bin.4	XM1_ASGE1	cultivable	95.49	0	16.7885	0.960384	d__Bacteria;p__Proteobacteria;c__Gammaproteobacteria;o__Burkholderiales;f__Burkholderiaceae;g__Limnohabitans_A;s__	N/A	N/A	N/A	N/A	N/A	N/A	N/A	N/A	N/A	N/A	d__Bacteria;p__Proteobacteria;c__Gammaproteobacteria;o__Burkholderiales;f__Burkholderiaceae;g__Limnohabitans_A;s__	taxonomic classification defined by topology and ANI	N/A	GCF_003063665.1, s__Limnohabitans_A sp003063665, 95.0, 81.77, 0.61; GCF_003063335.1, s__Limnohabitans_A sp003063335, 95.0, 81.7, 0.65; GCF_003063435.1, s__Limnohabitans_A sp003063435, 95.0, 81.52, 0.59; GCF_003063505.1, s__Limnohabitans_A sp003063505, 95.0, 81.38, 0.6; GCA_002255935.1, s__Limnohabitans_A sp002255935, 95.0, 81.33, 0.56; GCF_001269385.1, s__Limnohabitans_A sp001269385, 95.0, 81.22,…	85.25
ASGE1bin.5	XM1_ASGE1	cultivable	57.12	1.724	17.9413	0.995447	d__Bacteria;p__Bacteroidota;c__Bacteroidia;o__Flavobacteriales;f__Weeksellaceae;g__Cloacibacterium;s__	N/A	N/A	N/A	N/A	N/A	GCA_002337005.1	95	d__Bacteria;p__Bacteroidota;c__Bacteroidia;o__Flavobacteriales;f__Weeksellaceae;g__Cloacibacterium;s__Cloacibacterium sp002337005	91.97	0.68	d__Bacteria;p__Bacteroidota;c__Bacteroidia;o__Flavobacteriales;f__Weeksellaceae;g__Cloacibacterium;s__	taxonomic classification defined by topology and ANI	N/A	GCA_014645495.1, s__Cloacibacterium rupense, 95.0, 86.96, 0.71; GCF_003860565.1, s__Cloacibacterium normanense, 95.0, 82.76, 0.6; GCA_002422665.1, s__Cloacibacterium sp002422665, 95.0, 81.72, 0.53	43.2
ASGE1bin.6	XM1_ASGE1	cultivable	99.18	2.348	10.6638	0.976271	d__Bacteria;p__Proteobacteria;c__Alphaproteobacteria;o__Rhodobacterales;f__Rhodobacteraceae;g__Tabrizicola;s__	N/A	N/A	N/A	N/A	N/A	N/A	N/A	N/A	N/A	N/A	d__Bacteria;p__Proteobacteria;c__Alphaproteobacteria;o__Rhodobacterales;f__Rhodobacteraceae;g__Tabrizicola;s__	taxonomic classification defined by topology and ANI	N/A	GCF_008271465.1, s__Tabrizicola flagellatus, 95.0, 85.04, 0.74; GCF_003574395.1, s__Tabrizicola thermarum, 95.0, 84.97, 0.74; GCA_013824055.1, s__Tabrizicola sp013824055, 95.0, 84.93, 0.8; GCF_011174775.1, s__Tabrizicola sp011174775, 95.0, 84.92, 0.72; GCF_005222785.1, s__Tabrizicola sp005222785, 95.0, 84.89, 0.7; GCA_002280405.1, s__Tabrizicola sp002280405, 95.0, 83.92, 0.75; GCA_009773055.1, s_…	97.34
ASGE1bin.7	XM1_ASGE1	cultivable	94.22	5.723	30.449	N/A	d__Bacteria;p__Proteobacteria;c__Gammaproteobacteria;o__Burkholderiales;f__Burkholderiaceae;g__Giesbergeria;s__Giesbergeria sp001724785	GCA_001724785.1	95	d__Bacteria;p__Proteobacteria;c__Gammaproteobacteria;o__Burkholderiales;f__Burkholderiaceae;g__Giesbergeria;s__Giesbergeria sp001724785	98.46	0.79	GCA_001724785.1	95	d__Bacteria;p__Proteobacteria;c__Gammaproteobacteria;o__Burkholderiales;f__Burkholderiaceae;g__Giesbergeria;s__Giesbergeria sp001724785	98.46	0.79	d__Bacteria;p__Proteobacteria;c__Gammaproteobacteria;o__Burkholderiales;f__Burkholderiaceae;g__Giesbergeria;s__	taxonomic classification defined by topology and ANI	topological placement and ANI have congruent species assignments	GCF_003570885.1, s__Giesbergeria hankyongi, 95.0, 84.2, 0.75; GCF_003604195.1, s__Giesbergeria lacusdiani, 95.0, 84.13, 0.69; GCF_000739995.1, s__Giesbergeria granuli, 95.0, 83.73, 0.66; GCF_012932145.1, s__Giesbergeria sp012932145, 95.0, 82.88, 0.62; GCF_003008595.1, s__Giesbergeria suum, 95.0, 82.85, 0.74; GCA_001770955.1, s__Giesbergeria sp001770955, 95.0, 82.77, 0.62; GCF_010020825.1, s__Gies…	86.62
ASGE1bin.8	XM1_ASGE1	cultivable	79.81	9.482	19.5876	N/A	d__Bacteria;p__Proteobacteria;c__Gammaproteobacteria;o__Enterobacterales;f__Enterobacteriaceae;g__Enterobacter;s__Enterobacter cloacae	GCF_000025565.1	95	d__Bacteria;p__Proteobacteria;c__Gammaproteobacteria;o__Enterobacterales;f__Enterobacteriaceae;g__Enterobacter;s__Enterobacter cloacae	98.37	0.87	GCF_000025565.1	95	d__Bacteria;p__Proteobacteria;c__Gammaproteobacteria;o__Enterobacterales;f__Enterobacteriaceae;g__Enterobacter;s__Enterobacter cloacae	98.37	0.87	d__Bacteria;p__Proteobacteria;c__Gammaproteobacteria;o__Enterobacterales;f__Enterobacteriaceae;g__Enterobacter;s__	taxonomic classification defined by topology and ANI	topological placement and ANI have congruent species assignments	GCF_001022965.1, s__Enterobacter cloacae_L, 95.0, 89.18, 0.79; GCF_002939185.1, s__Enterobacter sichuanensis, 95.0, 89.12, 0.75; GCF_004402045.1, s__Enterobacter nimipressuralis_A, 95.0, 89.03, 0.78; GCF_007035645.1, s__Enterobacter asburiae_B, 96.8818, 88.97, 0.75; GCF_001729805.1, s__Enterobacter roggenkampii, 95.0, 88.96, 0.76; GCF_003634515.1, s__Enterobacter asburiae_A, 96.0274, 88.93, 0.77;…	65.59
ASGE1bin.9	XM1_ASGE1	cultivable	99.43	0.998	33.0202	N/A	d__Bacteria;p__Proteobacteria;c__Alphaproteobacteria;o__Rhizobiales;f__Rhizobiaceae;g__Agrobacterium;s__Agrobacterium oryzihabitans	GCF_010669145.1	95	d__Bacteria;p__Proteobacteria;c__Alphaproteobacteria;o__Rhizobiales;f__Rhizobiaceae;g__Agrobacterium;s__Agrobacterium oryzihabitans	99.07	0.88	GCF_010669145.1	95	d__Bacteria;p__Proteobacteria;c__Alphaproteobacteria;o__Rhizobiales;f__Rhizobiaceae;g__Agrobacterium;s__Agrobacterium oryzihabitans	99.07	0.88	d__Bacteria;p__Proteobacteria;c__Alphaproteobacteria;o__Rhizobiales;f__Rhizobiaceae;g__Agrobacterium;s__	taxonomic classification defined by topology and ANI	topological placement and ANI have congruent species assignments	GCF_900012615.1, s__Agrobacterium sp900012615, 95.0, 92.07, 0.83; GCA_000949895.1, s__Agrobacterium arsenijevicii, 95.0, 89.71, 0.75; GCF_000949865.1, s__Agrobacterium nepotum, 95.0, 89.46, 0.74; GCF_005221385.1, s__Agrobacterium sp900013535, 95.0, 89.2, 0.77; GCF_002943835.1, s__Agrobacterium deltaense, 95.0, 89.09, 0.75; GCF_000192635.1, s__Agrobacterium sp000192635, 95.0, 89.04, 0.75; GCF_0015…	89.95
ASGE2bin.1	XM1_ASGE2	cultivable	71.92	2.052	15.2149	N/A	d__Bacteria;p__Proteobacteria;c__Gammaproteobacteria;o__Enterobacterales;f__Enterobacteriaceae;g__Escherichia;s__Escherichia flexneri	GCF_002950215.1	97.0028	d__Bacteria;p__Proteobacteria;c__Gammaproteobacteria;o__Enterobacterales;f__Enterobacteriaceae;g__Escherichia;s__Escherichia flexneri	97.82	0.91	GCF_002949675.1	97.0028	d__Bacteria;p__Proteobacteria;c__Gammaproteobacteria;o__Enterobacterales;f__Enterobacteriaceae;g__Escherichia;s__Escherichia dysenteriae	97.07	0.85	d__Bacteria;p__Proteobacteria;c__Gammaproteobacteria;o__Enterobacterales;f__Enterobacteriaceae;g__Escherichia;s__	ANI	topological placement and ANI have incongruent species assignments	GCF_000026325.1, s__Escherichia coli_D, 96.9551, 97.65, 0.93; GCF_003697165.2, s__Escherichia coli, 96.8144, 96.79, 0.93; GCA_003018335.1, s__Escherichia coli_C, 96.1333, 96.1, 0.94; GCF_002965065.1, s__Escherichia sp002965065, 95.0, 94.5, 0.84; GCF_000208585.1, s__Escherichia sp000208585, 95.0, 92.95, 0.87; GCF_004211955.1, s__Escherichia sp004211955, 95.0, 92.82, 0.89; GCF_005843885.1, s__Esche…	52.83
ASGE2bin.10	XM1_ASGE2	cultivable	82.32	9.946	94.3378	N/A	d__Bacteria;p__Proteobacteria;c__Gammaproteobacteria;o__Burkholderiales;f__Burkholderiaceae;g__Giesbergeria;s__Giesbergeria sp010020825	GCF_010020825.1	95	d__Bacteria;p__Proteobacteria;c__Gammaproteobacteria;o__Burkholderiales;f__Burkholderiaceae;g__Giesbergeria;s__Giesbergeria sp010020825	97.44	0.92	GCF_010020825.1	95	d__Bacteria;p__Proteobacteria;c__Gammaproteobacteria;o__Burkholderiales;f__Burkholderiaceae;g__Giesbergeria;s__Giesbergeria sp010020825	97.44	0.92	d__Bacteria;p__Proteobacteria;c__Gammaproteobacteria;o__Burkholderiales;f__Burkholderiaceae;g__Giesbergeria;s__	taxonomic classification defined by topology and ANI	topological placement and ANI have congruent species assignments	GCF_003604195.1, s__Giesbergeria lacusdiani, 95.0, 86.28, 0.81; GCF_000739995.1, s__Giesbergeria granuli, 95.0, 85.82, 0.78; GCA_001770955.1, s__Giesbergeria sp001770955, 95.0, 84.94, 0.75; GCF_003096555.1, s__Giesbergeria sp003096555, 95.0, 82.61, 0.73; GCF_012932145.1, s__Giesbergeria sp012932145, 95.0, 82.0, 0.63; GCF_004341365.1, s__Giesbergeria metamorpha, 95.0, 81.6, 0.58; GCA_001724785.1, …	60.53
ASGE2bin.11	XM1_ASGE2	cultivable	57.51	0.819	5.13192	N/A	d__Bacteria;p__Bacteroidota;c__Bacteroidia;o__Bacteroidales;f__Dysgonomonadaceae;g__Dysgonomonas;s__Dysgonomonas sp900079735	GCF_004569505.1	95	d__Bacteria;p__Bacteroidota;c__Bacteroidia;o__Bacteroidales;f__Dysgonomonadaceae;g__Dysgonomonas;s__Dysgonomonas sp900079735	97.2	0.71	GCF_004569505.1	95	d__Bacteria;p__Bacteroidota;c__Bacteroidia;o__Bacteroidales;f__Dysgonomonadaceae;g__Dysgonomonas;s__Dysgonomonas sp900079735	97.2	0.71	d__Bacteria;p__Bacteroidota;c__Bacteroidia;o__Bacteroidales;f__Dysgonomonadaceae;g__Dysgonomonas;s__	taxonomic classification defined by topology and ANI	topological placement and ANI have congruent species assignments	GCF_000213575.1, s__Dysgonomonas mossii, 95.0, 93.9, 0.69; GCF_010501055.1, s__Dysgonomonas sp010501055, 95.0, 78.1, 0.27; GCA_900079725.1, s__Dysgonomonas sp900079725, 95.0, 77.62, 0.2; GCA_900556485.1, s__Dysgonomonas sp900556485, 95.0, 77.62, 0.08; GCF_000213555.1, s__Dysgonomonas gadei, 95.0, 77.59, 0.18; GCA_002409595.1, s__Dysgonomonas sp002409595, 95.0, 77.29, 0.13; GCA_001312525.1, s__Dys…	46.97
ASGE2bin.12	XM1_ASGE2	cultivable	99.43	1.449	14.2665	0.902864	d__Bacteria;p__Proteobacteria;c__Gammaproteobacteria;o__Burkholderiales;f__Burkholderiaceae;g__;s__	N/A	N/A	N/A	N/A	N/A	N/A	N/A	N/A	N/A	N/A	d__Bacteria;p__Proteobacteria;c__Gammaproteobacteria;o__Burkholderiales;f__Burkholderiaceae;g__;s__	taxonomic classification fully defined by topology	N/A	N/A	97.54
ASGE2bin.13	XM1_ASGE2	cultivable	98.21	0.381	9.86975	N/A	d__Bacteria;p__Proteobacteria;c__Gammaproteobacteria;o__Pseudomonadales;f__Moraxellaceae;g__Acinetobacter;s__Acinetobacter haemolyticus	GCF_000369065.1	95	d__Bacteria;p__Proteobacteria;c__Gammaproteobacteria;o__Pseudomonadales;f__Moraxellaceae;g__Acinetobacter;s__Acinetobacter haemolyticus	97.15	0.85	GCF_000369065.1	95	d__Bacteria;p__Proteobacteria;c__Gammaproteobacteria;o__Pseudomonadales;f__Moraxellaceae;g__Acinetobacter;s__Acinetobacter haemolyticus	97.15	0.85	d__Bacteria;p__Proteobacteria;c__Gammaproteobacteria;o__Pseudomonadales;f__Moraxellaceae;g__Acinetobacter;s__	taxonomic classification defined by topology and ANI	topological placement and ANI have congruent species assignments	GCF_008630915.1, s__Acinetobacter sp008630915, 95.0, 93.5, 0.84; GCF_900406815.1, s__Acinetobacter haemolyticus_A, 95.0, 92.51, 0.84; GCF_000368765.1, s__Acinetobacter junii, 95.0, 83.96, 0.67; GCF_000369005.1, s__Acinetobacter beijerinckii, 95.0, 83.94, 0.71; GCF_000369505.1, s__Acinetobacter sp000369505, 95.0, 83.8, 0.76; GCF_004208515.1, s__Acinetobacter halotolerans, 95.0, 83.76, 0.73; GCF_00…	91.54
ASGE2bin.14	XM1_ASGE2	cultivable	95.23	9.033	9.78936	N/A	d__Bacteria;p__Proteobacteria;c__Alphaproteobacteria;o__Rhizobiales;f__Rhizobiaceae;g__Allorhizobium;s__Allorhizobium sp900473245	GCF_900473245.1	95	d__Bacteria;p__Proteobacteria;c__Alphaproteobacteria;o__Rhizobiales;f__Rhizobiaceae;g__Allorhizobium;s__Allorhizobium sp900473245	98.36	0.9	GCF_900473245.1	95	d__Bacteria;p__Proteobacteria;c__Alphaproteobacteria;o__Rhizobiales;f__Rhizobiaceae;g__Allorhizobium;s__Allorhizobium sp900473245	98.36	0.9	d__Bacteria;p__Proteobacteria;c__Alphaproteobacteria;o__Rhizobiales;f__Rhizobiaceae;g__Allorhizobium;s__	taxonomic classification defined by topology and ANI	topological placement and ANI have congruent species assignments	GCF_002600635.1, s__Allorhizobium sp002600635, 95.0, 87.44, 0.79; GCF_014280875.1, s__Allorhizobium daejeonense, 95.0, 87.1, 0.73; GCA_003248775.1, s__Allorhizobium sp003248775, 95.0, 87.09, 0.7; GCF_000518785.1, s__Allorhizobium selenitireducens, 95.0, 82.09, 0.6; GCA_002796995.1, s__Allorhizobium sp002796995, 95.0, 82.04, 0.6; GCA_001724035.1, s__Allorhizobium sp001724035, 95.0, 81.96, 0.46; GC…	74.87
ASGE2bin.15	XM1_ASGE2	cultivable	93.22	4.003	9.80514	0.99862	d__Bacteria;p__Bacteroidota;c__Bacteroidia;o__Flavobacteriales;f__Weeksellaceae;g__Soonwooa;s__	N/A	N/A	N/A	N/A	N/A	GCF_900167905.1	95	d__Bacteria;p__Bacteroidota;c__Bacteroidia;o__Flavobacteriales;f__Weeksellaceae;g__Soonwooa;s__Soonwooa buanensis	93.92	0.89	d__Bacteria;p__Bacteroidota;c__Bacteroidia;o__Flavobacteriales;f__Weeksellaceae;g__Soonwooa;s__	taxonomic classification defined by topology and ANI	N/A	GCF_011058315.1, s__Soonwooa sp011058315, 95.0, 81.46, 0.67	73.71
ASGE2bin.16	XM1_ASGE2	cultivable	98.78	0.78	47.842	0.971642	d__Bacteria;p__Proteobacteria;c__Alphaproteobacteria;o__Sphingomonadales;f__Sphingomonadaceae;g__Sphingobium;s__	N/A	N/A	N/A	N/A	N/A	GCF_004122115.1	95	d__Bacteria;p__Proteobacteria;c__Alphaproteobacteria;o__Sphingomonadales;f__Sphingomonadaceae;g__Sphingobium;s__Sphingobium fluviale	81.83	0.53	d__Bacteria;p__Proteobacteria;c__Alphaproteobacteria;o__Sphingomonadales;f__Sphingomonadaceae;g__Sphingobium;s__	taxonomic classification defined by topology and ANI	N/A	GCF_014196495.1, s__Sphingobium jiangsuense, 95.0, 80.18, 0.43; GCA_006226685.1, s__Sphingobium sp006226685, 95.0, 79.44, 0.33; GCF_003967075.1, s__Sphingobium amiense, 95.0, 79.36, 0.34; GCF_000633575.2, s__Sphingobium lucknowense, 95.0, 79.24, 0.26; GCF_012927105.1, s__Sphingobium sp012927105, 95.0, 79.2, 0.3; GCF_002355855.1, s__Sphingobium cloacae, 95.0, 79.18, 0.31; GCF_014199435.1, s__Sphin…	96.33
ASGE2bin.17	XM1_ASGE2	cultivable	91.66	0	35.9718	N/A	d__Bacteria;p__Proteobacteria;c__Gammaproteobacteria;o__Burkholderiales;f__Burkholderiaceae;g__Ideonella;s__Ideonella dechloratans	GCF_008801845.1	95	d__Bacteria;p__Proteobacteria;c__Gammaproteobacteria;o__Burkholderiales;f__Burkholderiaceae;g__Ideonella;s__Ideonella dechloratans	96.56	0.89	GCF_008801845.1	95	d__Bacteria;p__Proteobacteria;c__Gammaproteobacteria;o__Burkholderiales;f__Burkholderiaceae;g__Ideonella;s__Ideonella dechloratans	96.56	0.89	d__Bacteria;p__Proteobacteria;c__Gammaproteobacteria;o__Burkholderiales;f__Burkholderiaceae;g__Ideonella;s__	taxonomic classification defined by topology and ANI	topological placement and ANI have congruent species assignments	GCF_000333615.1, s__Ideonella sp000333615, 95.0, 92.76, 0.7; GCF_010499455.1, s__Ideonella sp010499455, 95.0, 81.39, 0.54; GCA_002255925.1, s__Ideonella sp002255925, 95.0, 81.39, 0.52; GCF_002222655.1, s__Ideonella filiformis, 95.0, 79.71, 0.34; GCA_004359425.1, s__Ideonella sp004359425, 95.0, 79.38, 0.33	72.78
ASGE2bin.18	XM1_ASGE2	cultivable	91.86	1.182	16.2518	0.98406	d__Bacteria;p__Proteobacteria;c__Gammaproteobacteria;o__Burkholderiales;f__Burkholderiaceae;g__Acidovorax_C;s__	N/A	N/A	N/A	N/A	N/A	GCF_011303755.1	95	d__Bacteria;p__Proteobacteria;c__Gammaproteobacteria;o__Burkholderiales;f__Burkholderiaceae;g__Acidovorax_C;s__Acidovorax_C sp011303755	81.32	0.56	d__Bacteria;p__Proteobacteria;c__Gammaproteobacteria;o__Burkholderiales;f__Burkholderiaceae;g__Acidovorax_C;s__	taxonomic classification defined by topology and ANI	N/A	GCF_001298675.1, s__Acidovorax_C caeni, 95.0, 81.74, 0.57; GCA_001725235.1, s__Acidovorax_C sp001725235, 95.0, 81.38, 0.59	91.11
ASGE2bin.19	XM1_ASGE2	cultivable	86.68	2.098	16.4324	N/A	d__Bacteria;p__Bacteroidota;c__Bacteroidia;o__Bacteroidales;f__Tannerellaceae;g__Macellibacteroides;s__Macellibacteroides fermentans	GCF_013409575.1	95	d__Bacteria;p__Bacteroidota;c__Bacteroidia;o__Bacteroidales;f__Tannerellaceae;g__Macellibacteroides;s__Macellibacteroides fermentans	97.68	0.92	GCF_013409575.1	95	d__Bacteria;p__Bacteroidota;c__Bacteroidia;o__Bacteroidales;f__Tannerellaceae;g__Macellibacteroides;s__Macellibacteroides fermentans	97.68	0.92	d__Bacteria;p__Bacteroidota;c__Bacteroidia;o__Bacteroidales;f__Tannerellaceae;g__;s__	taxonomic classification defined by topology and ANI	topological placement and ANI have congruent species assignments	N/A	82.73
ASGE2bin.2	XM1_ASGE2	cultivable	99.02	0.413	30.0891	N/A	d__Bacteria;p__Proteobacteria;c__Alphaproteobacteria;o__Caulobacterales;f__Caulobacteraceae;g__Brevundimonas;s__Brevundimonas sp002484265	GCA_002484265.1	95	d__Bacteria;p__Proteobacteria;c__Alphaproteobacteria;o__Caulobacterales;f__Caulobacteraceae;g__Brevundimonas;s__Brevundimonas sp002484265	99.05	0.88	GCA_002484265.1	95	d__Bacteria;p__Proteobacteria;c__Alphaproteobacteria;o__Caulobacterales;f__Caulobacteraceae;g__Brevundimonas;s__Brevundimonas sp002484265	99.05	0.88	d__Bacteria;p__Proteobacteria;c__Alphaproteobacteria;o__Caulobacterales;f__Caulobacteraceae;g__Brevundimonas;s__	taxonomic classification defined by topology and ANI	topological placement and ANI have congruent species assignments	GCA_002434505.1, s__Brevundimonas sp002434505, 95.0, 92.66, 0.81; GCF_002157625.1, s__Brevundimonas sp002157625, 95.0, 90.36, 0.79; GCA_003248455.1, s__Brevundimonas sp003248455, 95.0, 88.47, 0.75; GCF_004614235.1, s__Brevundimonas intermedia, 95.0, 87.64, 0.74; GCF_900445985.1, s__Brevundimonas vesicularis_A, 95.0, 87.56, 0.74; GCF_000813765.1, s__Brevundimonas nasdae, 95.0, 87.55, 0.74; GCF_902…	95.77
ASGE2bin.20	XM1_ASGE2	cultivable	79.31	0	10.2057	N/A	d__Bacteria;p__Proteobacteria;c__Gammaproteobacteria;o__Pseudomonadales;f__Pseudomonadaceae;g__Pseudomonas_E;s__Pseudomonas_E fluvialis	GCF_002234375.1	95	d__Bacteria;p__Proteobacteria;c__Gammaproteobacteria;o__Pseudomonadales;f__Pseudomonadaceae;g__Pseudomonas_E;s__Pseudomonas_E fluvialis	98.23	0.89	GCF_002234375.1	95	d__Bacteria;p__Proteobacteria;c__Gammaproteobacteria;o__Pseudomonadales;f__Pseudomonadaceae;g__Pseudomonas_E;s__Pseudomonas_E fluvialis	98.23	0.89	d__Bacteria;p__Proteobacteria;c__Gammaproteobacteria;o__Pseudomonadales;f__Pseudomonadaceae;g__Pseudomonas_E;s__	taxonomic classification defined by topology and ANI	topological placement and ANI have congruent species assignments	GCF_000467105.1, s__Pseudomonas_E alcaligenes, 95.0, 82.34, 0.64; GCF_003205495.1, s__Pseudomonas_E alcaligenes_B, 95.0, 82.31, 0.65; GCF_902506505.1, s__Pseudomonas_E sp902506505, 95.0, 82.24, 0.65; GCF_900156545.1, s__Pseudomonas_E alcaligenes_A, 95.0, 82.2, 0.61; GCF_009799925.1, s__Pseudomonas_E sp009799925, 95.0, 82.12, 0.65; GCF_003696305.1, s__Pseudomonas_E sp003696305, 95.0, 81.92, 0.63; …	74.31
ASGE2bin.21	XM1_ASGE2	cultivable	90.03	1.351	18.2594	N/A	d__Bacteria;p__Proteobacteria;c__Gammaproteobacteria;o__Enterobacterales;f__Aeromonadaceae;g__Tolumonas;s__Tolumonas sp008015085	GCA_008015085.1	95	d__Bacteria;p__Proteobacteria;c__Gammaproteobacteria;o__Enterobacterales;f__Aeromonadaceae;g__Tolumonas;s__Tolumonas sp008015085	98.52	0.75	GCA_008015085.1	95	d__Bacteria;p__Proteobacteria;c__Gammaproteobacteria;o__Enterobacterales;f__Aeromonadaceae;g__Tolumonas;s__Tolumonas sp008015085	98.52	0.75	d__Bacteria;p__Proteobacteria;c__Gammaproteobacteria;o__Enterobacterales;f__Aeromonadaceae;g__Tolumonas;s__	taxonomic classification defined by topology and ANI	topological placement and ANI have congruent species assignments	GCF_014202415.1, s__Tolumonas osonensis, 95.0, 82.73, 0.71; GCF_000023065.1, s__Tolumonas auensis, 95.0, 81.83, 0.71; GCF_000527035.1, s__Tolumonas lignilytica, 95.0, 81.64, 0.65; GCA_903931645.1, s__Tolumonas sp903931645, 95.0, 80.87, 0.42; GCA_003251455.1, s__Tolumonas sp003251455, 95.0, 79.02, 0.3	83.24
ASGE2bin.22	XM1_ASGE2	cultivable	60.24	5.996	5.66805	0.990463	d__Bacteria;p__Proteobacteria;c__Gammaproteobacteria;o__Burkholderiales;f__Burkholderiaceae;g__Brachymonas;s__	N/A	N/A	N/A	N/A	N/A	GCF_900110225.1	95	d__Bacteria;p__Proteobacteria;c__Gammaproteobacteria;o__Burkholderiales;f__Burkholderiaceae;g__Brachymonas;s__Brachymonas denitrificans	87.77	0.88	d__Bacteria;p__Proteobacteria;c__Gammaproteobacteria;o__Burkholderiales;f__Burkholderiaceae;g__Brachymonas;s__	taxonomic classification defined by topology and ANI	N/A	GCF_000374625.1, s__Brachymonas chironomi, 95.0, 82.04, 0.67; GCA_012729605.1, s__Brachymonas sp012729605, 95.0, 81.69, 0.64	40.56
ASGE2bin.23	XM1_ASGE2	cultivable	77.07	4.561	9.18417	0.961015	d__Bacteria;p__Proteobacteria;c__Gammaproteobacteria;o__Burkholderiales;f__Burkholderiaceae;g__Limnohabitans_A;s__	N/A	N/A	N/A	N/A	N/A	N/A	N/A	N/A	N/A	N/A	d__Bacteria;p__Proteobacteria;c__Gammaproteobacteria;o__Burkholderiales;f__Burkholderiaceae;g__Limnohabitans_A;s__	ANI	N/A	GCF_003063665.1, s__Limnohabitans_A sp003063665, 95.0, 81.83, 0.62; GCF_003063335.1, s__Limnohabitans_A sp003063335, 95.0, 81.35, 0.63; GCF_003063575.1, s__Limnohabitans_A sp003063575, 95.0, 81.15, 0.61; GCA_002255935.1, s__Limnohabitans_A sp002255935, 95.0, 81.15, 0.59; GCF_003063505.1, s__Limnohabitans_A sp003063505, 95.0, 81.14, 0.61; GCF_003063435.1, s__Limnohabitans_A sp003063435, 95.0, 81.1…	62.66
ASGE2bin.24	XM1_ASGE2	cultivable	100	4.31	13.5673	N/A	d__Bacteria;p__Proteobacteria;c__Alphaproteobacteria;o__Sphingomonadales;f__Sphingomonadaceae;g__Sphingopyxis;s__Sphingopyxis sp001468395	GCF_001468395.1	95	d__Bacteria;p__Proteobacteria;c__Alphaproteobacteria;o__Sphingomonadales;f__Sphingomonadaceae;g__Sphingopyxis;s__Sphingopyxis sp001468395	97.12	0.88	GCF_001468395.1	95	d__Bacteria;p__Proteobacteria;c__Alphaproteobacteria;o__Sphingomonadales;f__Sphingomonadaceae;g__Sphingopyxis;s__Sphingopyxis sp001468395	97.12	0.88	d__Bacteria;p__Proteobacteria;c__Alphaproteobacteria;o__Sphingomonadales;f__Sphingomonadaceae;g__Sphingopyxis;s__	taxonomic classification defined by topology and ANI	topological placement and ANI have congruent species assignments	GCF_001468265.1, s__Sphingopyxis sp001468265, 95.0, 86.93, 0.73; GCA_013821905.1, s__Sphingopyxis sp013821905, 95.0, 86.16, 0.73; GCF_002993885.1, s__Sphingopyxis lindanitolerans, 95.0, 85.44, 0.7; GCF_001468285.1, s__Sphingopyxis sp001468285, 95.0, 85.35, 0.72; GCF_000756385.1, s__Sphingopyxis sp000756385, 95.0, 85.34, 0.72; GCA_900078365.1, s__Sphingopyxis sp900078365, 95.0, 85.34, 0.71; GCF_00…	94.62
ASGE2bin.25	XM1_ASGE2	cultivable	85.25	2.941	6.43844	0.954514	d__Bacteria;p__Bacteroidota;c__Bacteroidia;o__Flavobacteriales;f__Weeksellaceae;g__Bergeyella_A;s__	N/A	N/A	N/A	N/A	N/A	GCF_003614945.1	95	d__Bacteria;p__Bacteroidota;c__Bacteroidia;o__Flavobacteriales;f__Weeksellaceae;g__Bergeyella_A;s__Bergeyella_A cardium	76.93	0.07	d__Bacteria;p__Bacteroidota;c__Bacteroidia;o__Flavobacteriales;f__Weeksellaceae;g__Bergeyella_A;s__	taxonomic classification defined by topology and ANI	N/A	GCA_002484105.1, s__Bergeyella_A sp002484105, 95.0, 76.89, 0.1	67.8
ASGE2bin.26	XM1_ASGE2	cultivable	92.34	2.853	8.31579	0.926201	d__Bacteria;p__Proteobacteria;c__Alphaproteobacteria;o__Rhodobacterales;f__Rhodobacteraceae;g__;s__	N/A	N/A	N/A	N/A	N/A	N/A	N/A	N/A	N/A	N/A	d__Bacteria;p__Proteobacteria;c__Alphaproteobacteria;o__Rhodobacterales;f__Rhodobacteraceae;g__;s__	taxonomic novelty determined using RED	N/A	N/A	76.85
ASGE2bin.27	XM1_ASGE2	cultivable	64.81	5.172	14.258	0.996147	d__Bacteria;p__Bacteroidota;c__Bacteroidia;o__Flavobacteriales;f__Weeksellaceae;g__Epilithonimonas;s__	N/A	N/A	N/A	N/A	N/A	N/A	N/A	N/A	N/A	N/A	d__Bacteria;p__Bacteroidota;c__Bacteroidia;o__Flavobacteriales;f__Weeksellaceae;g__Epilithonimonas;s__	taxonomic classification defined by topology and ANI	N/A	GCF_003860605.1, s__Epilithonimonas sp002391865, 95.0, 94.8, 0.71; GCF_003730015.1, s__Epilithonimonas hominis, 95.0, 94.01, 0.65; GCA_002476905.1, s__Epilithonimonas sp002476905, 95.0, 91.85, 0.6; GCA_002383165.1, s__Epilithonimonas sp002383165, 95.0, 91.49, 0.64; GCA_002345565.1, s__Epilithonimonas sp002345565, 95.0, 86.21, 0.55; GCF_003385395.1, s__Epilithonimonas hispanica, 95.0, 85.95, 0.57;…	48.36
ASGE2bin.28	XM1_ASGE2	cultivable	62.08	7.279	4.26473	N/A	d__Bacteria;p__Proteobacteria;c__Gammaproteobacteria;o__Pseudomonadales;f__Moraxellaceae;g__Acinetobacter;s__Acinetobacter towneri	GCF_000368785.1	95	d__Bacteria;p__Proteobacteria;c__Gammaproteobacteria;o__Pseudomonadales;f__Moraxellaceae;g__Acinetobacter;s__Acinetobacter towneri	97.65	0.81	GCF_000368785.1	95	d__Bacteria;p__Proteobacteria;c__Gammaproteobacteria;o__Pseudomonadales;f__Moraxellaceae;g__Acinetobacter;s__Acinetobacter towneri	97.65	0.81	d__Bacteria;p__Proteobacteria;c__Gammaproteobacteria;o__Pseudomonadales;f__Moraxellaceae;g__Acinetobacter;s__	taxonomic classification defined by topology and ANI	topological placement and ANI have congruent species assignments	GCF_001758345.1, s__Acinetobacter towneri_A, 95.0, 93.7, 0.79; GCA_002296655.1, s__Acinetobacter sp002296655, 95.0, 93.31, 0.76; GCF_012371325.1, s__Acinetobacter sp012371325, 95.0, 88.92, 0.8; GCF_000368045.1, s__Acinetobacter johnsonii, 95.0, 80.81, 0.53; GCF_000488255.1, s__Acinetobacter indicus, 95.0, 80.64, 0.6; GCF_002165305.2, s__Acinetobacter sp002165305, 95.0, 80.58, 0.58; GCF_001647675.…	46.85
ASGE2bin.29	XM1_ASGE2	cultivable	53.44	3.448	6.02781	0.989074	d__Bacteria;p__Bacteroidota;c__Bacteroidia;o__Flavobacteriales;f__Flavobacteriaceae;g__Flavobacterium;s__	N/A	N/A	N/A	N/A	N/A	GCF_000686885.1	95	d__Bacteria;p__Bacteroidota;c__Bacteroidia;o__Flavobacteriales;f__Flavobacteriaceae;g__Flavobacterium;s__Flavobacterium sasangense	92.17	0.7	d__Bacteria;p__Bacteroidota;c__Bacteroidia;o__Flavobacteriales;f__Flavobacteriaceae;g__Flavobacterium;s__	taxonomic classification defined by topology and ANI	N/A	GCF_003259835.1, s__Flavobacterium aquaticum, 95.0, 90.05, 0.67; GCA_002422095.1, s__Flavobacterium sp002422095, 95.0, 89.4, 0.61; GCA_002421645.1, s__Flavobacterium sp002421645, 95.0, 89.08, 0.38; GCA_003963025.1, s__Flavobacterium sp003963025, 95.0, 88.17, 0.57; GCF_004363695.1, s__Flavobacterium cheniae, 95.0, 87.98, 0.67; GCA_003497625.1, s__Flavobacterium sp003497625, 95.0, 87.92, 0.64; GCA_…	37.64
ASGE2bin.5	XM1_ASGE2	cultivable	86.5	3.805	8.09463	0.858482	d__Bacteria;p__Proteobacteria;c__Alphaproteobacteria;o__Micropepsales;f__Micropepsaceae;g__UBA2784;s__	N/A	N/A	N/A	N/A	N/A	GCA_002352285.1	95	d__Bacteria;p__Proteobacteria;c__Alphaproteobacteria;o__Micropepsales;f__Micropepsaceae;g__UBA2784;s__UBA2784 sp002352285	77.5	0.22	d__Bacteria;p__Proteobacteria;c__Alphaproteobacteria;o__Micropepsales;f__Micropepsaceae;g__;s__	taxonomic classification defined by topology and ANI	N/A	N/A	85.11
ASGE2bin.6	XM1_ASGE2	cultivable	75.67	2.384	29.7294	N/A	d__Bacteria;p__Campylobacterota;c__Campylobacteria;o__Campylobacterales;f__Arcobacteraceae;g__Aliarcobacter;s__Aliarcobacter cryaerophilus_A	GCF_014352935.1	95	d__Bacteria;p__Campylobacterota;c__Campylobacteria;o__Campylobacterales;f__Arcobacteraceae;g__Aliarcobacter;s__Aliarcobacter cryaerophilus_A	98.63	0.9	GCF_014352935.1	95	d__Bacteria;p__Campylobacterota;c__Campylobacteria;o__Campylobacterales;f__Arcobacteraceae;g__Aliarcobacter;s__Aliarcobacter cryaerophilus_A	98.63	0.9	d__Bacteria;p__Campylobacterota;c__Campylobacteria;o__Campylobacterales;f__Arcobacteraceae;g__Aliarcobacter;s__	taxonomic classification defined by topology and ANI	topological placement and ANI have congruent species assignments	GCF_002993025.1, s__Aliarcobacter cryaerophilus_B, 95.0, 93.27, 0.9; GCF_003660105.1, s__Aliarcobacter cryaerophilus, 95.0, 93.22, 0.9; GCF_003355515.1, s__Aliarcobacter trophiarum, 95.0, 86.79, 0.85; GCF_003544835.1, s__Aliarcobacter skirrowii, 95.0, 86.53, 0.77; GCF_013201705.1, s__Aliarcobacter faecis, 95.0, 83.84, 0.82; GCF_003316695.1, s__Aliarcobacter sp003316695, 95.0, 83.54, 0.8; GCF_0133…	63.37
ASGE2bin.7	XM1_ASGE2	cultivable	53.49	3.6	4.96922	0.992239	d__Bacteria;p__Actinobacteriota;c__Actinomycetia;o__Streptomycetales;f__Streptomycetaceae;g__Streptomyces;s__	N/A	N/A	N/A	N/A	N/A	GCF_014257025.1	95	d__Bacteria;p__Actinobacteriota;c__Actinomycetia;o__Streptomycetales;f__Streptomycetaceae;g__Streptomyces;s__Streptomyces sp014257025	92.17	0.84	d__Bacteria;p__Actinobacteriota;c__Actinomycetia;o__Streptomycetales;f__Streptomycetaceae;g__Streptomyces;s__	taxonomic classification defined by topology and ANI	N/A	GCF_000349325.1, s__Streptomyces davaonensis, 95.0, 89.66, 0.83; GCA_000715615.1, s__Streptomyces cinnabarinus, 95.0, 89.44, 0.82; GCF_900091315.1, s__Streptomyces sp900091315, 95.0, 87.75, 0.8; GCF_014596915.1, s__Streptomyces sp014596915, 95.0, 87.66, 0.77; GCF_004028635.1, s__Streptomyces cyaneus, 95.0, 86.7, 0.72; GCA_014655715.1, s__Streptomyces lanatus, 95.0, 86.54, 0.76; GCF_008042075.1, s…	57.4
ASGE2bin.8	XM1_ASGE2	cultivable	74.73	5.192	22.4855	N/A	d__Bacteria;p__Proteobacteria;c__Gammaproteobacteria;o__Burkholderiales;f__Rhodocyclaceae;g__Azonexus;s__Azonexus sp009469615	GCF_009469615.1	95	d__Bacteria;p__Proteobacteria;c__Gammaproteobacteria;o__Burkholderiales;f__Rhodocyclaceae;g__Azonexus;s__Azonexus sp009469615	98.69	0.95	GCF_009469615.1	95	d__Bacteria;p__Proteobacteria;c__Gammaproteobacteria;o__Burkholderiales;f__Rhodocyclaceae;g__Azonexus;s__Azonexus sp009469615	98.69	0.95	d__Bacteria;p__Proteobacteria;c__Gammaproteobacteria;o__Burkholderiales;f__Rhodocyclaceae;g__Azonexus;s__	taxonomic classification defined by topology and ANI	topological placement and ANI have congruent species assignments	GCA_002440665.1, s__Azonexus sp002440665, 95.0, 86.63, 0.89; GCA_013363835.1, s__Azonexus sp013363835, 95.0, 85.11, 0.85; GCF_009469585.1, s__Azonexus sp009469585, 95.0, 84.1, 0.77; GCA_013693915.1, s__Azonexus sp013693915, 95.0, 83.35, 0.81; GCF_001551835.1, s__Azonexus denitrificans, 95.0, 83.1, 0.78; GCF_009469765.1, s__Azonexus hortensis, 95.0, 83.03, 0.79; GCF_003634965.1, s__Azonexus fungip…	60.53
ASGE2bin.9	XM1_ASGE2	cultivable	94.81	0.873	13.7607	0.942484	d__Bacteria;p__Proteobacteria;c__Alphaproteobacteria;o__Dongiales;f__Dongiaceae;g__Dongia;s__	N/A	N/A	N/A	N/A	N/A	GCF_004363235.1	95	d__Bacteria;p__Proteobacteria;c__Alphaproteobacteria;o__Dongiales;f__Dongiaceae;g__Dongia;s__Dongia mobilis	80.51	0.56	d__Bacteria;p__Proteobacteria;c__Alphaproteobacteria;o__Dongiales;f__Dongiaceae;g__Dongia;s__	taxonomic classification defined by topology and ANI	N/A	GCF_000620685.1, s__Dongia sp000620685, 95.0, 77.94, 0.28	87.45
ASGE3bin.1	XM1_ASGE3	uncultivable	58.42	0	11.7736	0.834407	d__Bacteria;p__Omnitrophota;c__Koll11;o__UBA10015;f__GCA-002753745;g__;s__	N/A	N/A	N/A	N/A	N/A	N/A	N/A	N/A	N/A	N/A	d__Bacteria;p__Omnitrophota;c__Koll11;o__UBA10015;f__GCA-002753745;g__;s__	taxonomic novelty determined using RED	N/A	N/A	50.07
ASGE3bin.10	XM1_ASGE3	uncultivable	89.65	3.038	7.36193	0.934896	d__Bacteria;p__Acidobacteriota;c__Blastocatellia;o__Pyrinomonadales;f__Pyrinomonadaceae;g__OLB17;s__	N/A	N/A	N/A	N/A	N/A	N/A	N/A	N/A	N/A	N/A	d__Bacteria;p__Acidobacteriota;c__Blastocatellia;o__Pyrinomonadales;f__Pyrinomonadaceae;g__OLB17;s__	ANI	N/A	GCA_011388875.1, s__OLB17 sp011388875, 95.0, 77.24, 0.03; GCA_001464455.1, s__OLB17 sp001464455, 95.0, 76.95, 0.18; GCA_001464665.1, s__OLB17 sp001464665, 95.0, 76.81, 0.12; GCA_002360555.1, s__OLB17 sp002360555, 95.0, 76.78, 0.22; GCA_001567505.1, s__OLB17 sp001567505, 95.0, 76.76, 0.13; GCA_003223975.1, s__OLB17 sp003223975, 95.0, 76.64, 0.09; GCA_013140875.1, s__OLB17 sp013140875, 95.0, 76.57,…	81.72
ASGE3bin.11	XM1_ASGE3	uncultivable	51.61	3.253	5.19344	0.878068	d__Bacteria;p__Actinobacteriota;c__Actinomycetia;o__Propionibacteriales;f__Nocardioidaceae;g__Marmoricola;s__	N/A	N/A	N/A	N/A	N/A	N/A	N/A	N/A	N/A	N/A	d__Bacteria;p__Actinobacteriota;c__Actinomycetia;o__Propionibacteriales;f__Nocardioidaceae;g__Marmoricola;s__	ANI	N/A	GCF_003674065.1, s__Marmoricola sp003674065, 95.0, 79.35, 0.46; GCF_000426045.1, s__Marmoricola sp000426045, 95.0, 79.19, 0.46; GCF_003725535.1, s__Marmoricola pocheonensis, 95.0, 78.92, 0.43; GCF_003725775.1, s__Marmoricola solisilvae, 95.0, 78.85, 0.41; GCF_003752505.1, s__Marmoricola aurantiacus, 95.0, 78.8, 0.47; GCF_001424755.1, s__Marmoricola sp001424755, 95.0, 78.79, 0.47; GCF_900104965.1,…	48.98
ASGE3bin.12	XM1_ASGE3	uncultivable	92.62	2.385	35.0137	0.924141	d__Bacteria;p__Proteobacteria;c__Gammaproteobacteria;o__Chromatiales;f__Chromatiaceae;g__M0108;s__	N/A	N/A	N/A	N/A	N/A	N/A	N/A	N/A	N/A	N/A	d__Bacteria;p__Proteobacteria;c__Gammaproteobacteria;o__Chromatiales;f__Chromatiaceae;g__;s__	taxonomic novelty determined using RED	N/A	N/A	76.91
ASGE3bin.13	XM1_ASGE3	uncultivable	68.86	2.938	6.73796	0.966402	d__Bacteria;p__Proteobacteria;c__Alphaproteobacteria;o__Sphingomonadales;f__Sphingomonadaceae;g__Novosphingobium;s__	N/A	N/A	N/A	N/A	N/A	N/A	N/A	N/A	N/A	N/A	d__Bacteria;p__Proteobacteria;c__Alphaproteobacteria;o__Sphingomonadales;f__Sphingomonadaceae;g__Novosphingobium;s__	taxonomic classification defined by topology and ANI	N/A	GCA_002440635.1, s__Novosphingobium sp002440635, 95.0, 81.43, 0.78; GCA_013141325.1, s__Novosphingobium sp013141325, 95.0, 81.08, 0.67; GCA_013822005.1, s__Novosphingobium sp013822005, 95.0, 81.06, 0.67; GCA_014652615.1, s__Novosphingobium arvoryzae, 95.0, 80.49, 0.7; GCF_002198665.1, s__Novosphingobium sp002198665, 95.0, 80.44, 0.75; GCF_002813245.1, s__Novosphingobium kunmingense, 95.0, 80.4, 0…	54.7
ASGE3bin.14	XM1_ASGE3	uncultivable	87.81	4.933	11.5536	0.879553	d__Bacteria;p__Bacteroidota;c__Bacteroidia;o__Chitinophagales;f__Saprospiraceae;g__UBA2365;s__	N/A	N/A	N/A	N/A	N/A	GCA_002344345.1	95	d__Bacteria;p__Bacteroidota;c__Bacteroidia;o__Chitinophagales;f__Saprospiraceae;g__UBA2365;s__UBA2365 sp002344345	76.35	0.03	d__Bacteria;p__Bacteroidota;c__Bacteroidia;o__Chitinophagales;f__Saprospiraceae;g__;s__	taxonomic classification defined by topology and ANI	N/A	N/A	78.98
ASGE3bin.15	XM1_ASGE3	uncultivable	65.51	1.724	8.08076	0.883497	d__Bacteria;p__Proteobacteria;c__Alphaproteobacteria;o__Acetobacterales;f__Acetobacteraceae;g__;s__	N/A	N/A	N/A	N/A	N/A	N/A	N/A	N/A	N/A	N/A	d__Bacteria;p__Proteobacteria;c__Alphaproteobacteria;o__Acetobacterales;f__Acetobacteraceae;g__;s__	taxonomic novelty determined using RED	N/A	N/A	55.33
ASGE3bin.16	XM1_ASGE3	uncultivable	62.33	0.181	7.52434	0.9429	d__Bacteria;p__Chloroflexota;c__Anaerolineae;o__Anaerolineales;f__Anaerolineaceae;g__UBA6107;s__	N/A	N/A	N/A	N/A	N/A	N/A	N/A	N/A	N/A	N/A	d__Bacteria;p__Chloroflexota;c__Anaerolineae;o__Anaerolineales;f__Anaerolineaceae;g__UBA6107;s__	ANI	N/A	GCA_009773005.1, s__UBA6107 sp009773005, 95.0, 77.06, 0.12; GCA_002347485.1, s__UBA6107 sp002347485, 95.0, 76.71, 0.14; GCA_003524305.1, s__UBA6107 sp003524305, 95.0, 76.58, 0.12; GCA_012797695.1, s__UBA6107 sp012797695, 95.0, 76.56, 0.09; GCA_012798065.1, s__UBA6107 sp012798065, 95.0, 76.53, 0.12; GCA_002402725.1, s__UBA6107 sp002402725, 95.0, 76.34, 0.08; GCA_002840715.1, s__UBA6107 sp002840715…	65.04
ASGE3bin.17	XM1_ASGE3	uncultivable	63.63	0.313	6.23238	0.888523	d__Bacteria;p__Patescibacteria;c__Microgenomatia;o__UBA12405;f__UBA12405;g__;s__	N/A	N/A	N/A	N/A	N/A	N/A	N/A	N/A	N/A	N/A	d__Bacteria;p__Patescibacteria;c__Microgenomatia;o__UBA12405;f__UBA12405;g__;s__	taxonomic novelty determined using RED	N/A	N/A	50.35
ASGE3bin.18	XM1_ASGE3	uncultivable	70.04	4.216	10.0318	0.868917	d__Bacteria;p__Myxococcota;c__Polyangia;o__Polyangiales;f__Polyangiaceae;g__SXNL01;s__	N/A	N/A	N/A	N/A	N/A	GCA_005777185.1	95	d__Bacteria;p__Myxococcota;c__Polyangia;o__Polyangiales;f__Polyangiaceae;g__SXNL01;s__SXNL01 sp005777185	77.69	0.4	d__Bacteria;p__Myxococcota;c__Polyangia;o__Polyangiales;f__Polyangiaceae;g__;s__	taxonomic classification defined by topology and ANI	N/A	N/A	66.37
ASGE3bin.19	XM1_ASGE3	uncultivable	91.99	4.636	8.95279	N/A	d__Bacteria;p__Bacteroidota;c__Bacteroidia;o__Chitinophagales;f__Chitinophagaceae;g__JJ008;s__JJ008 sp002352145	GCA_002352145.1	95	d__Bacteria;p__Bacteroidota;c__Bacteroidia;o__Chitinophagales;f__Chitinophagaceae;g__JJ008;s__JJ008 sp002352145	98.67	0.87	GCA_002352145.1	95	d__Bacteria;p__Bacteroidota;c__Bacteroidia;o__Chitinophagales;f__Chitinophagaceae;g__JJ008;s__JJ008 sp002352145	98.67	0.87	d__Bacteria;p__Bacteroidota;c__Bacteroidia;o__Chitinophagales;f__Chitinophagaceae;g__JJ008;s__	taxonomic classification defined by topology and ANI	topological placement and ANI have congruent species assignments	GCA_011331705.1, s__JJ008 sp011331705, 95.0, 84.21, 0.59; GCA_902826165.1, s__JJ008 sp902826165, 95.0, 77.42, 0.27; GCA_013140985.1, s__JJ008 sp013140985, 95.0, 77.37, 0.24; GCA_002400415.1, s__JJ008 sp002400415, 95.0, 77.23, 0.24; GCA_001464625.1, s__JJ008 sp001464625, 95.0, 77.07, 0.2; GCF_002127295.1, s__JJ008 sp002127295, 95.0, 76.99, 0.23; GCA_002069045.1, s__JJ008 sp002069045, 95.0, 76.89, …	82.79
ASGE3bin.2	XM1_ASGE3	uncultivable	55.37	1.507	5.08107	0.988636	d__Bacteria;p__Bacteroidota;c__Bacteroidia;o__AKYH767-A;f__OLB10;g__OLB10;s__	N/A	N/A	N/A	N/A	N/A	GCA_001567275.1	95	d__Bacteria;p__Bacteroidota;c__Bacteroidia;o__AKYH767-A;f__OLB10;g__OLB10;s__OLB10 sp001567275	91.35	0.92	d__Bacteria;p__Bacteroidota;c__Bacteroidia;o__AKYH767-A;f__OLB10;g__OLB10;s__	taxonomic classification defined by topology and ANI	N/A	GCA_002455375.1, s__OLB10 sp002455375, 95.0, 76.96, 0.3	55.55
ASGE3bin.20	XM1_ASGE3	uncultivable	97.97	1.401	19.2936	0.977287	d__Bacteria;p__Proteobacteria;c__Gammaproteobacteria;o__Burkholderiales;f__Burkholderiaceae;g__Rhodoferax;s__	N/A	N/A	N/A	N/A	N/A	N/A	N/A	N/A	N/A	N/A	d__Bacteria;p__Proteobacteria;c__Gammaproteobacteria;o__Burkholderiales;f__Burkholderiaceae;g__Rhodoferax;s__	ANI	N/A	GCA_903863395.1, s__Rhodoferax sp903863395, 95.0, 78.25, 0.33; GCA_002422455.1, s__Rhodoferax sp002422455, 95.0, 78.13, 0.27; GCA_001795455.1, s__Rhodoferax sp001795455, 95.0, 77.91, 0.23; GCF_003415675.1, s__Rhodoferax sp003415675, 95.0, 77.91, 0.22; GCF_002943465.1, s__Rhodoferax sp002943465, 95.0, 77.88, 0.21; GCA_903845935.1, s__Rhodoferax sp903845935, 95.0, 77.84, 0.22; GCA_903828665.1, s__R…	97.62
ASGE3bin.21	XM1_ASGE3	uncultivable	52.11	4.022	3.60609	0.969978	d__Bacteria;p__Bacteroidota;c__Bacteroidia;o__Chitinophagales;f__Chitinophagaceae;g__Ferruginibacter;s__	N/A	N/A	N/A	N/A	N/A	GCA_003455235.1	95	d__Bacteria;p__Bacteroidota;c__Bacteroidia;o__Chitinophagales;f__Chitinophagaceae;g__Ferruginibacter;s__Ferruginibacter sp003455235	78.77	0.38	d__Bacteria;p__Bacteroidota;c__Bacteroidia;o__Chitinophagales;f__Chitinophagaceae;g__Ferruginibacter;s__	taxonomic classification defined by topology and ANI	N/A	GCA_903837525.1, s__Ferruginibacter sp903837525, 95.0, 76.89, 0.02; GCA_014377975.1, s__Ferruginibacter sp014377975, 95.0, 76.67, 0.03; GCA_013298665.1, s__Ferruginibacter sp013298665, 95.0, 76.65, 0.13; GCA_903878475.1, s__Ferruginibacter sp903878475, 95.0, 76.55, 0.23; GCA_014379905.1, s__Ferruginibacter sp014379905, 95.0, 76.54, 0.07; GCA_013141115.1, s__Ferruginibacter sp013141115, 95.0, 76.3…	33.15
ASGE3bin.23	XM1_ASGE3	uncultivable	64.48	0.99	9.05693	0.900256	d__Bacteria;p__Patescibacteria;c__Paceibacteria;o__Moranbacterales;f__UBA1568;g__UBA1568;s__	N/A	N/A	N/A	N/A	N/A	GCA_001786575.1	95	d__Bacteria;p__Patescibacteria;c__Paceibacteria;o__Moranbacterales;f__UBA1568;g__UBA1568;s__UBA1568 sp001786575	77.99	0.07	d__Bacteria;p__Patescibacteria;c__Paceibacteria;o__Moranbacterales;f__UBA1568;g__UBA1568;s__	taxonomic classification defined by topology and ANI	N/A	GCA_001784735.1, s__UBA1568 sp001784735, 95.0, 82.32, 0.01; GCA_001784695.1, s__UBA1568 sp001784695, 95.0, 79.48, 0.03; GCA_002307715.1, s__UBA1568 sp002307715, 95.0, 78.69, 0.03; GCA_002782305.1, s__UBA1568 sp002782305, 95.0, 78.39, 0.04; GCA_002790675.1, s__UBA1568 sp002790675, 95.0, 76.07, 0.04	67.84
ASGE3bin.24	XM1_ASGE3	uncultivable	91.27	5.819	9.67169	N/A	d__Bacteria;p__Proteobacteria;c__Gammaproteobacteria;o__Chromatiales;f__Chromatiaceae;g__M0108;s__M0108 sp006227775	GCA_006227775.1	95	d__Bacteria;p__Proteobacteria;c__Gammaproteobacteria;o__Chromatiales;f__Chromatiaceae;g__M0108;s__M0108 sp006227775	97.9	0.73	GCA_006227775.1	95	d__Bacteria;p__Proteobacteria;c__Gammaproteobacteria;o__Chromatiales;f__Chromatiaceae;g__M0108;s__M0108 sp006227775	97.9	0.73	d__Bacteria;p__Proteobacteria;c__Gammaproteobacteria;o__Chromatiales;f__Chromatiaceae;g__M0108;s__	taxonomic classification defined by topology and ANI	topological placement and ANI have congruent species assignments	GCA_009928645.1, s__M0108 sp009928645, 95.0, 84.75, 0.6	86
ASGE3bin.25	XM1_ASGE3	uncultivable	93.66	1.728	11.371	0.786575	d__Bacteria;p__Proteobacteria;c__Gammaproteobacteria;o__Pseudomonadales;f__UBA5862;g__;s__	N/A	N/A	N/A	N/A	N/A	GCA_002408105.1	95	d__Bacteria;p__Proteobacteria;c__Gammaproteobacteria;o__Pseudomonadales;f__UBA5862;g__UBA5862;s__UBA5862 sp002408105	76.29	0.12	d__Bacteria;p__Proteobacteria;c__Gammaproteobacteria;o__Pseudomonadales;f__;g__;s__	taxonomic classification defined by topology and ANI	N/A	N/A	91.24
ASGE3bin.26	XM1_ASGE3	uncultivable	67.06	2.09	8.0413	0.639197	d__Bacteria;p__Patescibacteria;c__Saccharimonadia;o__CAILAD01;f__;g__;s__	N/A	N/A	N/A	N/A	N/A	N/A	N/A	N/A	N/A	N/A	d__Bacteria;p__Patescibacteria;c__Saccharimonadia;o__;f__;g__;s__	taxonomic novelty determined using RED	N/A	N/A	67
ASGE3bin.27	XM1_ASGE3	uncultivable	61.72	0	6.4905	0.857755	d__Bacteria;p__Patescibacteria;c__Microgenomatia;o__Levybacterales;f__GWA1-39-11;g__CG2-30-37-29;s__	N/A	N/A	N/A	N/A	N/A	GCA_001873215.1	95	d__Bacteria;p__Patescibacteria;c__Microgenomatia;o__Levybacterales;f__GWA1-39-11;g__CG2-30-37-29;s__CG2-30-37-29 sp001873215	76.08	0.02	d__Bacteria;p__Patescibacteria;c__Microgenomatia;o__Levybacterales;f__GWA1-39-11;g__;s__	taxonomic classification defined by topology and ANI	N/A	N/A	55.37
ASGE3bin.28	XM1_ASGE3	uncultivable	55.94	6.083	5.80643	0.906072	d__Bacteria;p__Patescibacteria;c__Doudnabacteria;o__UBA920;f__UBA920;g__UBA920;s__	N/A	N/A	N/A	N/A	N/A	GCA_002293685.1	95	d__Bacteria;p__Patescibacteria;c__Doudnabacteria;o__UBA920;f__UBA920;g__UBA920;s__UBA920 sp002293685	77.71	0.13	d__Bacteria;p__Patescibacteria;c__Doudnabacteria;o__UBA920;f__UBA920;g__;s__	taxonomic classification defined by topology and ANI	N/A	N/A	50.7
ASGE3bin.29	XM1_ASGE3	uncultivable	57.71	1.954	6.47888	0.901822	d__Bacteria;p__Patescibacteria;c__ABY1;o__UBA9570;f__UBA9570;g__UBA9570;s__	N/A	N/A	N/A	N/A	N/A	GCA_003512175.1	95	d__Bacteria;p__Patescibacteria;c__ABY1;o__UBA9570;f__UBA9570;g__UBA9570;s__UBA9570 sp003512175	76.7	0.1	d__Bacteria;p__Patescibacteria;c__ABY1;o__UBA9570;f__;g__;s__	taxonomic classification defined by topology and ANI	N/A	N/A	44.43
ASGE3bin.3	XM1_ASGE3	uncultivable	85.76	1.666	8.24708	0.890114	d__Bacteria;p__Bacteroidota;c__Bacteroidia;o__AKYH767-A;f__2013-40CM-41-45;g__CAINVI01;s__	N/A	N/A	N/A	N/A	N/A	GCA_903854075.1	95	d__Bacteria;p__Bacteroidota;c__Bacteroidia;o__AKYH767-A;f__2013-40CM-41-45;g__CAINVI01;s__CAINVI01 sp903854075	76.34	0.05	d__Bacteria;p__Bacteroidota;c__Bacteroidia;o__AKYH767-A;f__2013-40CM-41-45;g__;s__	taxonomic classification defined by topology and ANI	N/A	N/A	81.74
ASGE3bin.30	XM1_ASGE3	uncultivable	65.74	4.816	9.85102	0.850294	d__Bacteria;p__Patescibacteria;c__Saccharimonadia;o__Saccharimonadales;f__AWTP1-31;g__;s__	N/A	N/A	N/A	N/A	N/A	N/A	N/A	N/A	N/A	N/A	d__Bacteria;p__Patescibacteria;c__Saccharimonadia;o__Saccharimonadales;f__;g__;s__	taxonomic novelty determined using RED	N/A	N/A	63.15
ASGE3bin.31	XM1_ASGE3	uncultivable	96.8	2.178	14.776	0.884063	d__Bacteria;p__Chloroflexota;c__Dehalococcoidia;o__UBA2991;f__UBA2991;g__;s__	N/A	N/A	N/A	N/A	N/A	N/A	N/A	N/A	N/A	N/A	d__Bacteria;p__Chloroflexota;c__Dehalococcoidia;o__UBA2991;f__UBA2991;g__;s__	taxonomic classification fully defined by topology	N/A	N/A	89.4
ASGE3bin.32	XM1_ASGE3	uncultivable	70.83	2.777	15.386	0.833494	d__Bacteria;p__Patescibacteria;c__Saccharimonadia;o__Saccharimonadales;f__AWTP1-31;g__;s__	N/A	N/A	N/A	N/A	N/A	N/A	N/A	N/A	N/A	N/A	d__Bacteria;p__Patescibacteria;c__Saccharimonadia;o__Saccharimonadales;f__;g__;s__	taxonomic novelty determined using RED	N/A	N/A	75.12
ASGE3bin.33	XM1_ASGE3	uncultivable	58.17	1.094	11.9488	0.630428	d__Bacteria;p__Patescibacteria;c__Saccharimonadia;o__CAILAD01;f__;g__;s__	N/A	N/A	N/A	N/A	N/A	N/A	N/A	N/A	N/A	N/A	d__Bacteria;p__Patescibacteria;c__Saccharimonadia;o__;f__;g__;s__	taxonomic novelty determined using RED	N/A	N/A	62.08
ASGE3bin.34	XM1_ASGE3	uncultivable	95.9	2.717	15.1581	0.952765	d__Bacteria;p__Proteobacteria;c__Gammaproteobacteria;o__Steroidobacterales;f__Steroidobacteraceae;g__RPQJ01;s__	N/A	N/A	N/A	N/A	N/A	GCA_011391405.1	95	d__Bacteria;p__Proteobacteria;c__Gammaproteobacteria;o__Steroidobacterales;f__Steroidobacteraceae;g__RPQJ01;s__RPQJ01 sp011391405	80.47	0.47	d__Bacteria;p__Proteobacteria;c__Gammaproteobacteria;o__Steroidobacterales;f__Steroidobacteraceae;g__RPQJ01;s__	taxonomic classification defined by topology and ANI	N/A	GCA_003819815.1, s__RPQJ01 sp003819815, 95.0, 80.28, 0.51; GCA_012026925.1, s__RPQJ01 sp012026925, 95.0, 79.6, 0.41	75.44
ASGE3bin.35	XM1_ASGE3	uncultivable	95.32	3.475	18.3068	0.670047	d__Bacteria;p__Bacteroidota;c__Bacteroidia;o__Chitinophagales;f__;g__;s__	N/A	N/A	N/A	N/A	N/A	N/A	N/A	N/A	N/A	N/A	d__Bacteria;p__Bacteroidota;c__Bacteroidia;o__Chitinophagales;f__;g__;s__	taxonomic novelty determined using RED	N/A	N/A	94.08
ASGE3bin.36	XM1_ASGE3	uncultivable	56.9	5.659	5.82442	0.855663	d__Bacteria;p__Patescibacteria;c__Microgenomatia;o__Levybacterales;f__GWA1-39-11;g__CG2-30-37-29;s__	N/A	N/A	N/A	N/A	N/A	GCA_001873215.1	95	d__Bacteria;p__Patescibacteria;c__Microgenomatia;o__Levybacterales;f__GWA1-39-11;g__CG2-30-37-29;s__CG2-30-37-29 sp001873215	76.14	0.02	d__Bacteria;p__Patescibacteria;c__Microgenomatia;o__Levybacterales;f__GWA1-39-11;g__;s__	taxonomic classification defined by topology and ANI	N/A	N/A	41.67
ASGE3bin.37	XM1_ASGE3	uncultivable	56.03	1.724	17.7577	N/A	d__Bacteria;p__Proteobacteria;c__Gammaproteobacteria;o__Burkholderiales;f__Rhodocyclaceae;g__UTPRO2;s__UTPRO2 sp008933825	GCA_008933825.1	95	d__Bacteria;p__Proteobacteria;c__Gammaproteobacteria;o__Burkholderiales;f__Rhodocyclaceae;g__UTPRO2;s__UTPRO2 sp008933825	99.44	0.81	GCA_008933825.1	95	d__Bacteria;p__Proteobacteria;c__Gammaproteobacteria;o__Burkholderiales;f__Rhodocyclaceae;g__UTPRO2;s__UTPRO2 sp008933825	99.44	0.81	d__Bacteria;p__Proteobacteria;c__Gammaproteobacteria;o__Burkholderiales;f__Rhodocyclaceae;g__UTPRO2;s__	taxonomic classification defined by topology and ANI	topological placement and ANI have congruent species assignments	GCA_011526165.1, s__UTPRO2 sp011526165, 95.0, 89.63, 0.68; GCA_003105015.1, s__UTPRO2 sp003105015, 95.0, 87.32, 0.77; GCA_002066955.1, s__UTPRO2 sp002066955, 95.0, 86.17, 0.52; GCA_002840845.1, s__UTPRO2 sp002840845, 95.0, 83.92, 0.63	45.19
ASGE3bin.38	XM1_ASGE3	uncultivable	72.18	2.475	5.94845	0.928828	d__Bacteria;p__Patescibacteria;c__Gracilibacteria;o__UBA1369;f__UBA1369;g__PALSA-1335;s__	N/A	N/A	N/A	N/A	N/A	GCA_003153355.1	95	d__Bacteria;p__Patescibacteria;c__Gracilibacteria;o__UBA1369;f__UBA1369;g__PALSA-1335;s__PALSA-1335 sp003153355	77.58	0.28	d__Bacteria;p__Patescibacteria;c__Gracilibacteria;o__UBA1369;f__UBA1369;g__;s__	taxonomic classification defined by topology and ANI	N/A	N/A	63.59
ASGE3bin.39	XM1_ASGE3	uncultivable	54.09	3.783	6.19337	0.738246	d__Bacteria;p__Actinobacteriota;c__Actinomycetia;o__Nanopelagicales;f__GCA-2699445;g__;s__	N/A	N/A	N/A	N/A	N/A	N/A	N/A	N/A	N/A	N/A	d__Bacteria;p__Actinobacteriota;c__Actinomycetia;o__Nanopelagicales;f__;g__;s__	taxonomic novelty determined using RED	N/A	N/A	40.4
ASGE3bin.40	XM1_ASGE3	uncultivable	87.93	2.237	8.8218	0.881896	d__Bacteria;p__Acidobacteriota;c__Thermoanaerobaculia;o__UBA5704;f__UBA5704;g__JAAYLR01;s__	N/A	N/A	N/A	N/A	N/A	GCA_012521815.1	95	d__Bacteria;p__Acidobacteriota;c__Thermoanaerobaculia;o__UBA5704;f__UBA5704;g__JAAYLR01;s__JAAYLR01 sp012521815	78.86	0.38	d__Bacteria;p__Acidobacteriota;c__Thermoanaerobaculia;o__UBA5704;f__UBA5704;g__;s__	taxonomic classification defined by topology and ANI	N/A	N/A	82.89
ASGE3bin.41	XM1_ASGE3	uncultivable	91.37	1.88	42.5549	0.888797	d__Bacteria;p__Patescibacteria;c__Gracilibacteria;o__BD1-5;f__UBA2023;g__;s__	N/A	N/A	N/A	N/A	N/A	N/A	N/A	N/A	N/A	N/A	d__Bacteria;p__Patescibacteria;c__Gracilibacteria;o__BD1-5;f__UBA2023;g__;s__	taxonomic novelty determined using RED	N/A	N/A	79.67
ASGE3bin.42	XM1_ASGE3	uncultivable	58.22	2.434	7.55006	0.872052	d__Bacteria;p__Patescibacteria;c__Saccharimonadia;o__Saccharimonadales;f__SZUA-47;g__RFTN01;s__	N/A	N/A	N/A	N/A	N/A	GCA_009923445.1	95	d__Bacteria;p__Patescibacteria;c__Saccharimonadia;o__Saccharimonadales;f__SZUA-47;g__RFTN01;s__RFTN01 sp009923445	82.43	0.02	d__Bacteria;p__Patescibacteria;c__Saccharimonadia;o__Saccharimonadales;f__SZUA-47;g__;s__	taxonomic classification defined by topology and ANI	N/A	N/A	53.05
ASGE3bin.45	XM1_ASGE3	uncultivable	58.88	8.957	3.81459	0.935401	d__Bacteria;p__Bacteroidota;c__Bacteroidia;o__Bacteroidales;f__VadinHA17;g__LD21;s__	N/A	N/A	N/A	N/A	N/A	N/A	N/A	N/A	N/A	N/A	d__Bacteria;p__Bacteroidota;c__Bacteroidia;o__Bacteroidales;f__VadinHA17;g__LD21;s__	ANI	N/A	GCA_003141525.1, s__LD21 sp003141525, 95.0, 78.4, 0.04; GCA_012729475.1, s__LD21 sp012729475, 95.0, 77.9, 0.1; GCA_003152835.1, s__LD21 sp003152835, 95.0, 77.75, 0.09; GCA_002428385.1, s__LD21 sp002428385, 95.0, 77.48, 0.07; GCA_012519515.1, s__LD21 sp012519515, 95.0, 77.39, 0.1; GCA_012517605.1, s__LD21 sp012517605, 95.0, 77.35, 0.07; GCA_013314865.1, s__LD21 sp013314865, 95.0, 77.28, 0.05; GCA_…	37.54
ASGE3bin.46	XM1_ASGE3	uncultivable	59.66	8.461	3.73066	0.889716	d__Bacteria;p__Spirochaetota;c__Leptospirae;o__Turneriellales;f__Turneriellaceae;g__Turneriella;s__	N/A	N/A	N/A	N/A	N/A	GCF_000266885.1	95	d__Bacteria;p__Spirochaetota;c__Leptospirae;o__Turneriellales;f__Turneriellaceae;g__Turneriella;s__Turneriella parva	77.12	0.21	d__Bacteria;p__Spirochaetota;c__Leptospirae;o__Turneriellales;f__;g__;s__	taxonomic classification defined by topology and ANI	N/A	N/A	37.44
ASGE3bin.49	XM1_ASGE3	uncultivable	55.2	6.495	4.77577	0.75206	d__Bacteria;p__Patescibacteria;c__Saccharimonadia;o__Saccharimonadales;f__UBA7683;g__;s__	N/A	N/A	N/A	N/A	N/A	GCA_002482925.1	95	d__Bacteria;p__Patescibacteria;c__Saccharimonadia;o__Saccharimonadales;f__UBA7683;g__UBA7683;s__UBA7683 sp002482925	74.97	0.03	d__Bacteria;p__Patescibacteria;c__Saccharimonadia;o__Saccharimonadales;f__;g__;s__	taxonomic classification defined by topology and ANI	N/A	N/A	50.29
ASGE3bin.5	XM1_ASGE3	uncultivable	60.22	0	11.99	0.862332	d__Bacteria;p__Patescibacteria;c__Paceibacteria;o__UBA9983_A;f__UBA2163;g__;s__	N/A	N/A	N/A	N/A	N/A	N/A	N/A	N/A	N/A	N/A	d__Bacteria;p__Patescibacteria;c__Paceibacteria;o__UBA9983_A;f__UBA2163;g__;s__	taxonomic novelty determined using RED	N/A	N/A	69.19
ASGE3bin.6	XM1_ASGE3	uncultivable	79.83	2.631	8.26359	0.855971	d__Bacteria;p__Acidobacteriota;c__Holophagae;o__Holophagales;f__Holophagaceae;g__;s__	N/A	N/A	N/A	N/A	N/A	N/A	N/A	N/A	N/A	N/A	d__Bacteria;p__Acidobacteriota;c__Holophagae;o__Holophagales;f__Holophagaceae;g__;s__	taxonomic classification fully defined by topology	N/A	N/A	55.03
ASGE3bin.7	XM1_ASGE3	uncultivable	57.7	0	9.01852	0.742	d__Bacteria;p__Patescibacteria;c__Paceibacteria;o__Moranbacterales;f__;g__;s__	N/A	N/A	N/A	N/A	N/A	N/A	N/A	N/A	N/A	N/A	d__Bacteria;p__Patescibacteria;c__Paceibacteria;o__Moranbacterales;f__;g__;s__	taxonomic novelty determined using RED	N/A	N/A	57.43
ASGE3bin.8	XM1_ASGE3	uncultivable	53.73	7.673	4.82501	0.81778	d__Bacteria;p__Bacteroidota;c__Bacteroidia;o__Chitinophagales;f__Saprospiraceae;g__;s__	N/A	N/A	N/A	N/A	N/A	N/A	N/A	N/A	N/A	N/A	d__Bacteria;p__Bacteroidota;c__Bacteroidia;o__Chitinophagales;f__Saprospiraceae;g__;s__	taxonomic novelty determined using RED	N/A	N/A	40.86
ASGE3bin.9	XM1_ASGE3	uncultivable	73.19	1.388	5.65009	0.875876	d__Bacteria;p__Bacteroidota;c__Bacteroidia;o__Chitinophagales;f__Saprospiraceae;g__UBA2365;s__	N/A	N/A	N/A	N/A	N/A	GCA_002344345.1	95	d__Bacteria;p__Bacteroidota;c__Bacteroidia;o__Chitinophagales;f__Saprospiraceae;g__UBA2365;s__UBA2365 sp002344345	75.95	0.02	d__Bacteria;p__Bacteroidota;c__Bacteroidia;o__Chitinophagales;f__Saprospiraceae;g__;s__	taxonomic classification defined by topology and ANI	N/A	N/A	63.85
ASISGE4bin.1	XM6_ASISGE4	cultivable	90.25	2.819	13.7518	0.958901	d__Bacteria;p__Proteobacteria;c__Alphaproteobacteria;o__Sphingomonadales;f__Sphingomonadaceae;g__Chakrabartia;s__	N/A	N/A	N/A	N/A	N/A	N/A	N/A	N/A	N/A	N/A	d__Bacteria;p__Proteobacteria;c__Alphaproteobacteria;o__Sphingomonadales;f__Sphingomonadaceae;g__Chakrabartia;s__	taxonomic classification defined by topology and ANI	N/A	GCF_005518185.1, s__Chakrabartia godavariana, 95.0, 80.92, 0.66; GCA_903839675.1, s__Chakrabartia sp903839675, 95.0, 79.84, 0.54; GCA_903958285.1, s__Chakrabartia sp903958285, 95.0, 79.46, 0.41; GCA_009923795.1, s__Chakrabartia sp009923795, 95.0, 78.6, 0.33; GCA_009920915.1, s__Chakrabartia sp009920915, 95.0, 78.3, 0.35; GCA_002478575.1, s__Chakrabartia sp002478575, 95.0, 76.61, 0.13	77.9
ASISGE4bin.12	XM6_ASISGE4	cultivable	90	2.121	11.8729	0.925023	d__Bacteria;p__Chloroflexota;c__Anaerolineae;o__SBR1031;f__A4b;g__OLB15;s__	N/A	N/A	N/A	N/A	N/A	GCA_013360465.1	95	d__Bacteria;p__Chloroflexota;c__Anaerolineae;o__SBR1031;f__A4b;g__OLB15;s__OLB15 sp013360465	77	0.18	d__Bacteria;p__Chloroflexota;c__Anaerolineae;o__SBR1031;f__A4b;g__OLB15;s__	taxonomic classification defined by topology and ANI	N/A	GCA_010092805.1, s__OLB15 sp010092805, 95.0, 76.41, 0.15; GCA_011047115.1, s__OLB15 sp011047115, 95.0, 76.14, 0.11; GCA_001567085.1, s__OLB15 sp001567085, 95.0, 76.04, 0.09	84.89
ASISGE4bin.13	XM6_ASISGE4	cultivable	85.81	1.706	43.3403	0.86204	d__Bacteria;p__Proteobacteria;c__Alphaproteobacteria;o__Micropepsales;f__Micropepsaceae;g__UBA2784;s__	N/A	N/A	N/A	N/A	N/A	GCA_002352285.1	95	d__Bacteria;p__Proteobacteria;c__Alphaproteobacteria;o__Micropepsales;f__Micropepsaceae;g__UBA2784;s__UBA2784 sp002352285	77.75	0.23	d__Bacteria;p__Proteobacteria;c__Alphaproteobacteria;o__Micropepsales;f__Micropepsaceae;g__;s__	taxonomic classification defined by topology and ANI	N/A	N/A	83.11
ASISGE4bin.14	XM6_ASISGE4	cultivable	63.79	6.896	6.62409	0.992213	d__Bacteria;p__Proteobacteria;c__Gammaproteobacteria;o__Xanthomonadales;f__Xanthomonadaceae;g__SCMT01;s__	N/A	N/A	N/A	N/A	N/A	GCF_005502915.1	95	d__Bacteria;p__Proteobacteria;c__Gammaproteobacteria;o__Xanthomonadales;f__Xanthomonadaceae;g__SCMT01;s__SCMT01 sp005502915	91.42	0.85	d__Bacteria;p__Proteobacteria;c__Gammaproteobacteria;o__Xanthomonadales;f__Xanthomonadaceae;g__SCMT01;s__	taxonomic classification defined by topology and ANI	N/A	GCA_011526085.1, s__SCMT01 sp011526085, 95.0, 83.64, 0.7; GCA_013141175.1, s__SCMT01 sp013141175, 95.0, 81.87, 0.65; GCA_008015835.1, s__SCMT01 sp008015835, 95.0, 80.31, 0.57; GCA_008015095.1, s__SCMT01 sp008015095, 95.0, 78.74, 0.37	47.31
ASISGE4bin.15	XM6_ASISGE4	cultivable	97.24	2.11	26.1987	N/A	d__Bacteria;p__Proteobacteria;c__Alphaproteobacteria;o__Caulobacterales;f__Caulobacteraceae;g__Phenylobacterium;s__Phenylobacterium sp001724985	GCA_001724985.1	95	d__Bacteria;p__Proteobacteria;c__Alphaproteobacteria;o__Caulobacterales;f__Caulobacteraceae;g__Phenylobacterium;s__Phenylobacterium sp001724985	98.28	0.8	GCA_001724985.1	95	d__Bacteria;p__Proteobacteria;c__Alphaproteobacteria;o__Caulobacterales;f__Caulobacteraceae;g__Phenylobacterium;s__Phenylobacterium sp001724985	98.28	0.8	d__Bacteria;p__Proteobacteria;c__Alphaproteobacteria;o__Caulobacterales;f__Caulobacteraceae;g__Phenylobacterium;s__	taxonomic classification defined by topology and ANI	topological placement and ANI have congruent species assignments	GCA_013822795.1, s__Phenylobacterium sp013822795, 95.0, 85.69, 0.83; GCF_001425305.1, s__Phenylobacterium sp001425305, 95.0, 85.57, 0.82; GCF_014196295.1, s__Phenylobacterium haematophilum, 95.0, 85.53, 0.84; GCF_001429025.1, s__Phenylobacterium sp001429025, 95.0, 84.46, 0.81; GCF_003254505.1, s__Phenylobacterium hankyongense, 95.0, 82.1, 0.64; GCF_003254475.1, s__Phenylobacterium sp003254475, 95…	91.82
ASISGE4bin.16	XM6_ASISGE4	cultivable	61.48	3.447	13.6133	0.955917	d__Bacteria;p__Verrucomicrobiota;c__Verrucomicrobiae;o__Opitutales;f__Opitutaceae;g__UBA2377;s__	N/A	N/A	N/A	N/A	N/A	GCA_903952145.1	95	d__Bacteria;p__Verrucomicrobiota;c__Verrucomicrobiae;o__Opitutales;f__Opitutaceae;g__UBA2377;s__UBA2377 sp903952145	79.66	0.49	d__Bacteria;p__Verrucomicrobiota;c__Verrucomicrobiae;o__Opitutales;f__Opitutaceae;g__UBA2377;s__	taxonomic classification defined by topology and ANI	N/A	GCA_002344205.1, s__UBA2377 sp002344205, 95.0, 79.65, 0.46	48.66
ASISGE4bin.17	XM6_ASISGE4	cultivable	98.5	0	15.8996	0.926153	d__Bacteria;p__Proteobacteria;c__Alphaproteobacteria;o__Ferrovibrionales;f__Ferrovibrionaceae;g__Ferrovibrio;s__	N/A	N/A	N/A	N/A	N/A	GCA_002482765.1	95	d__Bacteria;p__Proteobacteria;c__Alphaproteobacteria;o__Ferrovibrionales;f__Ferrovibrionaceae;g__Ferrovibrio;s__Ferrovibrio sp002482765	81.6	0.55	d__Bacteria;p__Proteobacteria;c__Alphaproteobacteria;o__Ferrovibrionales;f__Ferrovibrionaceae;g__Ferrovibrio;s__	taxonomic classification defined by topology and ANI	N/A	GCA_002796975.1, s__Ferrovibrio sp002796975, 95.0, 79.93, 0.44; GCF_007197755.1, s__Ferrovibrio terrae, 95.0, 79.89, 0.45	94.88
ASISGE4bin.18	XM6_ASISGE4	cultivable	71.04	3.916	5.86564	0.936231	d__Bacteria;p__Proteobacteria;c__Alphaproteobacteria;o__Sphingomonadales;f__Sphingomonadaceae;g__Sphingomonas;s__	N/A	N/A	N/A	N/A	N/A	N/A	N/A	N/A	N/A	N/A	d__Bacteria;p__Proteobacteria;c__Alphaproteobacteria;o__Sphingomonadales;f__Sphingomonadaceae;g__Sphingomonas;s__	taxonomic classification defined by topology and ANI	N/A	GCF_000935025.1, s__Sphingomonas hengshuiensis, 95.0, 79.87, 0.7; GCF_011057975.1, s__Sphingomonas sp011057975, 95.0, 79.85, 0.59; GCF_011761945.1, s__Sphingomonas leidyi, 95.0, 79.73, 0.63; GCF_002127225.1, s__Sphingomonas sp002127225, 95.0, 79.7, 0.64; GCF_003171655.1, s__Sphingomonas portus, 95.0, 79.67, 0.62; GCF_011927635.1, s__Sphingomonas trueperi, 95.0, 79.66, 0.6; GCF_000226955.1, s__Sph…	55.13
ASISGE4bin.19	XM6_ASISGE4	cultivable	91.81	2.231	8.88879	0.921528	d__Bacteria;p__Chloroflexota;c__Anaerolineae;o__SBR1031;f__A4b;g__CFX2;s__	N/A	N/A	N/A	N/A	N/A	GCA_903864435.1	95	d__Bacteria;p__Chloroflexota;c__Anaerolineae;o__SBR1031;f__A4b;g__CFX2;s__CFX2 sp903864435	77.08	0.22	d__Bacteria;p__Chloroflexota;c__Anaerolineae;o__SBR1031;f__A4b;g__CFX2;s__	taxonomic classification defined by topology and ANI	N/A	GCA_013388735.1, s__CFX2 sp013388735, 95.0, 76.9, 0.25; GCA_014338005.1, s__CFX2 sp014338005, 95.0, 76.65, 0.24	88.9
ASISGE4bin.2	XM6_ASISGE4	cultivable	55.51	9.482	6.89509	0.989557	d__Bacteria;p__Bacteroidota;c__Bacteroidia;o__Flavobacteriales;f__Weeksellaceae;g__Cloacibacterium;s__	N/A	N/A	N/A	N/A	N/A	N/A	N/A	N/A	N/A	N/A	d__Bacteria;p__Bacteroidota;c__Bacteroidia;o__Flavobacteriales;f__Weeksellaceae;g__Cloacibacterium;s__	taxonomic classification defined by topology and ANI	N/A	GCA_002337005.1, s__Cloacibacterium sp002337005, 95.0, 83.68, 0.71; GCA_014645495.1, s__Cloacibacterium rupense, 95.0, 83.13, 0.71; GCF_003860565.1, s__Cloacibacterium normanense, 95.0, 80.99, 0.59; GCA_002422665.1, s__Cloacibacterium sp002422665, 95.0, 80.78, 0.53	46.4
ASISGE4bin.20	XM6_ASISGE4	cultivable	81.75	5.203	8.7775	0.897714	d__Bacteria;p__Proteobacteria;c__Gammaproteobacteria;o__Burkholderiales;f__Burkholderiaceae;g__;s__	N/A	N/A	N/A	N/A	N/A	N/A	N/A	N/A	N/A	N/A	d__Bacteria;p__Proteobacteria;c__Gammaproteobacteria;o__Burkholderiales;f__Burkholderiaceae;g__;s__	taxonomic classification fully defined by topology	N/A	N/A	81.7
ASISGE4bin.21	XM6_ASISGE4	cultivable	79.7	3.92	22.4986	N/A	d__Bacteria;p__Campylobacterota;c__Campylobacteria;o__Campylobacterales;f__Arcobacteraceae;g__Aliarcobacter;s__Aliarcobacter cryaerophilus_A	GCF_014352935.1	95	d__Bacteria;p__Campylobacterota;c__Campylobacteria;o__Campylobacterales;f__Arcobacteraceae;g__Aliarcobacter;s__Aliarcobacter cryaerophilus_A	98.46	0.89	GCF_014352935.1	95	d__Bacteria;p__Campylobacterota;c__Campylobacteria;o__Campylobacterales;f__Arcobacteraceae;g__Aliarcobacter;s__Aliarcobacter cryaerophilus_A	98.46	0.89	d__Bacteria;p__Campylobacterota;c__Campylobacteria;o__Campylobacterales;f__Arcobacteraceae;g__Aliarcobacter;s__	taxonomic classification defined by topology and ANI	topological placement and ANI have congruent species assignments	GCF_002993025.1, s__Aliarcobacter cryaerophilus_B, 95.0, 92.85, 0.87; GCF_003660105.1, s__Aliarcobacter cryaerophilus, 95.0, 92.84, 0.9; GCF_003355515.1, s__Aliarcobacter trophiarum, 95.0, 86.51, 0.87; GCF_003544835.1, s__Aliarcobacter skirrowii, 95.0, 85.83, 0.82; GCF_013201705.1, s__Aliarcobacter faecis, 95.0, 83.5, 0.84; GCF_013372265.1, s__Aliarcobacter cibarius, 95.0, 82.72, 0.79; GCF_004299…	64.88
ASISGE4bin.22	XM6_ASISGE4	cultivable	65.48	0.884	6.76563	0.770038	d__Bacteria;p__Proteobacteria;c__Alphaproteobacteria;o__CACIAM-22H2;f__CACIAM-22H2;g__;s__	N/A	N/A	N/A	N/A	N/A	GCA_014444615.1	95	d__Bacteria;p__Proteobacteria;c__Alphaproteobacteria;o__CACIAM-22H2;f__CACIAM-22H2;g__Tagaea;s__Tagaea sp014444615	76.97	0.25	d__Bacteria;p__Proteobacteria;c__Alphaproteobacteria;o__CACIAM-22H2;f__CACIAM-22H2;g__;s__	taxonomic classification defined by topology and ANI	N/A	N/A	62
ASISGE4bin.23	XM6_ASISGE4	cultivable	91.98	1.921	6.1072	N/A	d__Bacteria;p__Bacteroidota;c__Bacteroidia;o__Chitinophagales;f__Chitinophagaceae;g__JJ008;s__JJ008 sp002069045	GCA_002069045.1	95	d__Bacteria;p__Bacteroidota;c__Bacteroidia;o__Chitinophagales;f__Chitinophagaceae;g__JJ008;s__JJ008 sp002069045	98.92	0.76	GCA_002069045.1	95	d__Bacteria;p__Bacteroidota;c__Bacteroidia;o__Chitinophagales;f__Chitinophagaceae;g__JJ008;s__JJ008 sp002069045	98.92	0.76	d__Bacteria;p__Bacteroidota;c__Bacteroidia;o__Chitinophagales;f__Chitinophagaceae;g__JJ008;s__	taxonomic classification defined by topology and ANI	topological placement and ANI have congruent species assignments	GCA_002352145.1, s__JJ008 sp002352145, 95.0, 76.71, 0.13; GCA_011331705.1, s__JJ008 sp011331705, 95.0, 76.67, 0.12; GCA_903879995.1, s__JJ008 sp903879995, 95.0, 76.62, 0.07; GCA_002342205.1, s__JJ008 sp002342205, 95.0, 76.57, 0.07; GCF_002127295.1, s__JJ008 sp002127295, 95.0, 76.56, 0.18; GCA_003489485.1, s__JJ008 sp003489485, 95.0, 76.56, 0.06; GCA_013140985.1, s__JJ008 sp013140985, 95.0, 76.53,…	87.47
ASISGE4bin.24	XM6_ASISGE4	cultivable	97.03	1.186	20.5634	0.970732	d__Bacteria;p__Proteobacteria;c__Alphaproteobacteria;o__Sphingomonadales;f__Sphingomonadaceae;g__Sphingopyxis;s__	N/A	N/A	N/A	N/A	N/A	N/A	N/A	N/A	N/A	N/A	d__Bacteria;p__Proteobacteria;c__Alphaproteobacteria;o__Sphingomonadales;f__Sphingomonadaceae;g__Sphingopyxis;s__	taxonomic classification defined by topology and ANI	N/A	GCF_002993885.1, s__Sphingopyxis lindanitolerans, 95.0, 87.15, 0.79; GCF_001468395.1, s__Sphingopyxis sp001468395, 95.0, 86.31, 0.78; GCF_001468265.1, s__Sphingopyxis sp001468265, 95.0, 85.94, 0.78; GCA_900078365.1, s__Sphingopyxis sp900078365, 95.0, 85.91, 0.79; GCA_013821905.1, s__Sphingopyxis sp013821905, 95.0, 85.87, 0.69; GCF_002277025.1, s__Sphingopyxis sp002277025, 95.0, 85.76, 0.78; GCF_0…	90.01
ASISGE4bin.25	XM6_ASISGE4	cultivable	98.87	0.503	17.3105	0.989121	d__Bacteria;p__Proteobacteria;c__Alphaproteobacteria;o__Sphingomonadales;f__Sphingomonadaceae;g__Sphingorhabdus_B;s__	N/A	N/A	N/A	N/A	N/A	GCF_003367235.1	95	d__Bacteria;p__Proteobacteria;c__Alphaproteobacteria;o__Sphingomonadales;f__Sphingomonadaceae;g__Sphingorhabdus_B;s__Sphingorhabdus_B sp003367235	82.51	0.74	d__Bacteria;p__Proteobacteria;c__Alphaproteobacteria;o__Sphingomonadales;f__Sphingomonadaceae;g__Sphingorhabdus_B;s__	taxonomic classification defined by topology and ANI	N/A	GCF_009768975.1, s__Sphingorhabdus_B lacus, 95.0, 78.33, 0.34; GCF_009769755.1, s__Sphingorhabdus_B profundilacus, 95.0, 78.02, 0.32; GCF_007280415.1, s__Sphingorhabdus_B contaminans, 95.0, 78.01, 0.32; GCA_013823985.1, s__Sphingorhabdus_B sp013823985, 95.0, 77.98, 0.33; GCA_002479765.1, s__Sphingorhabdus_B sp002479765, 95.0, 77.83, 0.26; GCA_013297725.1, s__Sphingorhabdus_B sp013297725, 95.0, 77…	96.82
ASISGE4bin.26	XM6_ASISGE4	cultivable	95.26	1.525	11.9508	N/A	d__Bacteria;p__Proteobacteria;c__Gammaproteobacteria;o__Pseudomonadales;f__Pseudomonadaceae;g__Pseudomonas_E;s__Pseudomonas_E alcaligenes	GCF_000467105.1	95	d__Bacteria;p__Proteobacteria;c__Gammaproteobacteria;o__Pseudomonadales;f__Pseudomonadaceae;g__Pseudomonas_E;s__Pseudomonas_E alcaligenes	96.92	0.89	GCF_000467105.1	95	d__Bacteria;p__Proteobacteria;c__Gammaproteobacteria;o__Pseudomonadales;f__Pseudomonadaceae;g__Pseudomonas_E;s__Pseudomonas_E alcaligenes	96.92	0.89	d__Bacteria;p__Proteobacteria;c__Gammaproteobacteria;o__Pseudomonadales;f__Pseudomonadaceae;g__Pseudomonas_E;s__	taxonomic classification defined by topology and ANI	topological placement and ANI have congruent species assignments	GCF_900156545.1, s__Pseudomonas_E alcaligenes_A, 95.0, 94.4, 0.86; GCF_003205495.1, s__Pseudomonas_E alcaligenes_B, 95.0, 91.43, 0.81; GCF_005508865.1, s__Pseudomonas_E sp005508865, 95.0, 89.59, 0.83; GCF_000761545.1, s__Pseudomonas_E sp000761545, 95.0, 88.86, 0.8; GCA_002483005.1, s__Pseudomonas_E sp002483005, 95.0, 88.06, 0.64; GCF_902506505.1, s__Pseudomonas_E sp902506505, 95.0, 87.36, 0.76; G…	89.87
ASISGE4bin.28	XM6_ASISGE4	cultivable	65.51	7.758	5.95204	0.993128	d__Bacteria;p__Proteobacteria;c__Gammaproteobacteria;o__Burkholderiales;f__Rhodocyclaceae;g__Zoogloea;s__	N/A	N/A	N/A	N/A	N/A	GCA_008011925.1	95	d__Bacteria;p__Proteobacteria;c__Gammaproteobacteria;o__Burkholderiales;f__Rhodocyclaceae;g__Zoogloea;s__Zoogloea sp008011925	87.58	0.49	d__Bacteria;p__Proteobacteria;c__Gammaproteobacteria;o__Burkholderiales;f__Rhodocyclaceae;g__Zoogloea;s__	taxonomic classification defined by topology and ANI	N/A	GCA_009026175.1, s__Zoogloea sp009026175, 95.0, 83.92, 0.64; GCF_012927165.1, s__Zoogloea sp012927165, 95.0, 83.6, 0.71; GCF_008107625.1, s__Zoogloea oleivorans, 95.0, 82.71, 0.65; GCF_009469605.1, s__Zoogloea sp009469605, 95.0, 82.48, 0.62; GCF_006539865.1, s__Zoogloea ramigera, 95.0, 82.26, 0.56; GCF_002028455.1, s__Zoogloea sp002028455, 95.0, 81.97, 0.6	46.56
ASISGE4bin.3	XM6_ASISGE4	cultivable	94.8	3.654	9.32894	0.992705	d__Bacteria;p__Proteobacteria;c__Gammaproteobacteria;o__Xanthomonadales;f__Xanthomonadaceae;g__Stenotrophomonas;s__	N/A	N/A	N/A	N/A	N/A	N/A	N/A	N/A	N/A	N/A	d__Bacteria;p__Proteobacteria;c__Gammaproteobacteria;o__Xanthomonadales;f__Xanthomonadaceae;g__Stenotrophomonas;s__	taxonomic classification defined by topology and ANI	N/A	GCA_003248565.1, s__Stenotrophomonas sp003248565, 95.0, 90.24, 0.71; GCA_002471015.1, s__Stenotrophomonas sp002471015, 95.0, 89.18, 0.72; GCF_001431465.1, s__Stenotrophomonas terrae, 95.0, 88.4, 0.79; GCF_001700965.1, s__Stenotrophomonas nitritireducens_A, 95.0, 88.11, 0.8; GCF_004348115.1, s__Stenotrophomonas sp004348115, 95.0, 85.56, 0.72; GCF_001310775.1, s__Stenotrophomonas pictorum, 95.0, 85…	74.33
ASISGE4bin.30	XM6_ASISGE4	cultivable	96.66	0.844	13.8101	0.997908	d__Bacteria;p__Proteobacteria;c__Gammaproteobacteria;o__Pseudomonadales;f__Moraxellaceae;g__Acinetobacter;s__	N/A	N/A	N/A	N/A	N/A	GCF_001696615.3	95	d__Bacteria;p__Proteobacteria;c__Gammaproteobacteria;o__Pseudomonadales;f__Moraxellaceae;g__Acinetobacter;s__Acinetobacter sp001696615	93.73	0.94	d__Bacteria;p__Proteobacteria;c__Gammaproteobacteria;o__Pseudomonadales;f__Moraxellaceae;g__Acinetobacter;s__	taxonomic classification defined by topology and ANI	N/A	GCF_000368865.1, s__Acinetobacter bouvetii, 95.0, 81.96, 0.71; GCF_001605895.1, s__Acinetobacter pragensis, 95.0, 81.66, 0.66; GCF_002135435.1, s__Acinetobacter sp002135435, 95.0, 80.69, 0.64; GCF_001707755.1, s__Acinetobacter celticus, 95.0, 80.07, 0.5; GCF_003611465.1, s__Acinetobacter sp003611465, 95.0, 79.84, 0.5; GCF_002135205.1, s__Acinetobacter sp002135205, 95.0, 79.68, 0.36; GCF_003105055…	77.76
ASISGE4bin.31	XM6_ASISGE4	cultivable	72.73	0.609	6.26034	0.976961	d__Bacteria;p__Proteobacteria;c__Gammaproteobacteria;o__Burkholderiales;f__UKL13-2;g__FEB-7;s__	N/A	N/A	N/A	N/A	N/A	GCA_003105245.1	95	d__Bacteria;p__Proteobacteria;c__Gammaproteobacteria;o__Burkholderiales;f__UKL13-2;g__FEB-7;s__FEB-7 sp003105245	89.82	0.79	d__Bacteria;p__Proteobacteria;c__Gammaproteobacteria;o__Burkholderiales;f__UKL13-2;g__FEB-7;s__	taxonomic classification defined by topology and ANI	N/A	GCA_011391275.1, s__FEB-7 sp011391275, 95.0, 85.89, 0.72	48.9
ASISGE4bin.32	XM6_ASISGE4	cultivable	50.07	6.343	38.1072	0.937825	d__Bacteria;p__Proteobacteria;c__Gammaproteobacteria;o__Burkholderiales;f__Burkholderiaceae;g__Ramlibacter;s__	N/A	N/A	N/A	N/A	N/A	N/A	N/A	N/A	N/A	N/A	d__Bacteria;p__Proteobacteria;c__Gammaproteobacteria;o__Burkholderiales;f__Burkholderiaceae;g__;s__	taxonomic novelty determined using RED	N/A	N/A	62.12
ASISGE4bin.33	XM6_ASISGE4	cultivable	79.04	3.484	12.4176	N/A	d__Bacteria;p__Bacteroidota;c__Bacteroidia;o__Bacteroidales;f__Tannerellaceae;g__Macellibacteroides;s__Macellibacteroides fermentans	GCF_013409575.1	95	d__Bacteria;p__Bacteroidota;c__Bacteroidia;o__Bacteroidales;f__Tannerellaceae;g__Macellibacteroides;s__Macellibacteroides fermentans	97.97	0.88	GCF_013409575.1	95	d__Bacteria;p__Bacteroidota;c__Bacteroidia;o__Bacteroidales;f__Tannerellaceae;g__Macellibacteroides;s__Macellibacteroides fermentans	97.97	0.88	d__Bacteria;p__Bacteroidota;c__Bacteroidia;o__Bacteroidales;f__Tannerellaceae;g__;s__	taxonomic classification defined by topology and ANI	topological placement and ANI have congruent species assignments	N/A	75.22
ASISGE4bin.34	XM6_ASISGE4	cultivable	73.94	9.26	5.10938	N/A	d__Bacteria;p__Proteobacteria;c__Gammaproteobacteria;o__Pseudomonadales;f__Pseudomonadaceae;g__Pseudomonas_E;s__Pseudomonas_E extremaustralis	GCF_900102035.1	95	d__Bacteria;p__Proteobacteria;c__Gammaproteobacteria;o__Pseudomonadales;f__Pseudomonadaceae;g__Pseudomonas_E;s__Pseudomonas_E extremaustralis	98.07	0.76	GCF_900102035.1	95	d__Bacteria;p__Proteobacteria;c__Gammaproteobacteria;o__Pseudomonadales;f__Pseudomonadaceae;g__Pseudomonas_E;s__Pseudomonas_E extremaustralis	98.07	0.76	d__Bacteria;p__Proteobacteria;c__Gammaproteobacteria;o__Pseudomonadales;f__Pseudomonadaceae;g__Pseudomonas_E;s__	taxonomic classification defined by topology and ANI	topological placement and ANI have congruent species assignments	GCF_003612935.1, s__Pseudomonas_E sp003013355, 95.0, 89.21, 0.66; GCF_003097075.1, s__Pseudomonas_E sp003097075, 95.0, 89.09, 0.65; GCF_001439695.1, s__Pseudomonas_E veronii, 95.0, 89.03, 0.69; GCF_007858185.1, s__Pseudomonas_E grimontii, 95.0, 88.97, 0.67; GCF_900105325.1, s__Pseudomonas_E marginalis, 95.0, 88.97, 0.68; GCF_002843605.1, s__Pseudomonas_E sp002843605, 95.0, 88.9, 0.65; GCF_0142072…	49.79
ASISGE4bin.35	XM6_ASISGE4	cultivable	85.62	6.481	6.51765	N/A	d__Bacteria;p__Proteobacteria;c__Gammaproteobacteria;o__Burkholderiales;f__Casimicrobiaceae;g__Casimicrobium;s__Casimicrobium huifangae	GCF_009746125.1	95	d__Bacteria;p__Proteobacteria;c__Gammaproteobacteria;o__Burkholderiales;f__Casimicrobiaceae;g__Casimicrobium;s__Casimicrobium huifangae	97.31	0.91	GCF_009746125.1	95	d__Bacteria;p__Proteobacteria;c__Gammaproteobacteria;o__Burkholderiales;f__Casimicrobiaceae;g__Casimicrobium;s__Casimicrobium huifangae	97.31	0.91	d__Bacteria;p__Proteobacteria;c__Gammaproteobacteria;o__Burkholderiales;f__Casimicrobiaceae;g__Casimicrobium;s__	taxonomic classification defined by topology and ANI	topological placement and ANI have congruent species assignments	GCA_014378555.1, s__Casimicrobium sp014378555, 95.0, 77.19, 0.22; GCA_004293675.1, s__Casimicrobium sp004293675, 95.0, 76.61, 0.13; GCA_013298765.1, s__Casimicrobium sp013298765, 95.0, 76.48, 0.14; GCA_013298145.1, s__Casimicrobium sp004294365, 95.0, 76.47, 0.13; GCA_013298045.1, s__Casimicrobium sp013298045, 95.0, 76.46, 0.13; GCA_013298455.1, s__Casimicrobium sp013298455, 95.0, 76.25, 0.11; GCA…	60.12
ASISGE4bin.38	XM6_ASISGE4	cultivable	54.83	8.626	21.6045	0.986468	d__Bacteria;p__Proteobacteria;c__Gammaproteobacteria;o__Burkholderiales;f__Rhodocyclaceae;g__Azonexus;s__	N/A	N/A	N/A	N/A	N/A	GCF_009469615.1	95	d__Bacteria;p__Proteobacteria;c__Gammaproteobacteria;o__Burkholderiales;f__Rhodocyclaceae;g__Azonexus;s__Azonexus sp009469615	91.49	0.75	d__Bacteria;p__Proteobacteria;c__Gammaproteobacteria;o__Burkholderiales;f__Rhodocyclaceae;g__Azonexus;s__	taxonomic classification defined by topology and ANI	N/A	GCF_000519045.1, s__Azonexus agitatus, 95.0, 84.99, 0.71; GCA_002440665.1, s__Azonexus sp002440665, 95.0, 84.87, 0.64; GCF_008711155.1, s__Azonexus sp008711155, 95.0, 84.12, 0.64; GCA_013363835.1, s__Azonexus sp013363835, 95.0, 83.8, 0.62; GCF_009469585.1, s__Azonexus sp009469585, 95.0, 83.63, 0.7; GCF_003634965.1, s__Azonexus fungiphilus, 95.0, 83.11, 0.62; GCA_008933675.1, s__Azonexus sp0089336…	47.53
ASISGE4bin.39	XM6_ASISGE4	cultivable	53.21	4.31	8.04223	N/A	d__Bacteria;p__Proteobacteria;c__Gammaproteobacteria;o__Enterobacterales;f__Enterobacteriaceae;g__Escherichia;s__Escherichia flexneri	GCF_002950215.1	97.0028	d__Bacteria;p__Proteobacteria;c__Gammaproteobacteria;o__Enterobacterales;f__Enterobacteriaceae;g__Escherichia;s__Escherichia flexneri	97.65	0.82	GCF_002949675.1	97.0028	d__Bacteria;p__Proteobacteria;c__Gammaproteobacteria;o__Enterobacterales;f__Enterobacteriaceae;g__Escherichia;s__Escherichia dysenteriae	96.91	0.77	d__Bacteria;p__Proteobacteria;c__Gammaproteobacteria;o__Enterobacterales;f__Enterobacteriaceae;g__Escherichia;s__	ANI	topological placement and ANI have incongruent species assignments	GCF_000026325.1, s__Escherichia coli_D, 96.9551, 97.1, 0.83; GCF_003697165.2, s__Escherichia coli, 96.8144, 96.87, 0.82; GCA_003018335.1, s__Escherichia coli_C, 96.1333, 95.85, 0.84; GCF_002965065.1, s__Escherichia sp002965065, 95.0, 94.08, 0.73; GCF_000208585.1, s__Escherichia sp000208585, 95.0, 92.57, 0.8; GCF_004211955.1, s__Escherichia sp004211955, 95.0, 92.41, 0.81; GCF_005843885.1, s__Esche…	39.19
ASISGE4bin.4	XM6_ASISGE4	cultivable	60.5	0	4.75122	N/A	d__Bacteria;p__Proteobacteria;c__Gammaproteobacteria;o__Pseudomonadales;f__Moraxellaceae;g__Acinetobacter;s__Acinetobacter chinensis	GCF_002165375.2	95	d__Bacteria;p__Proteobacteria;c__Gammaproteobacteria;o__Pseudomonadales;f__Moraxellaceae;g__Acinetobacter;s__Acinetobacter chinensis	97.5	0.98	GCF_002165375.2	95	d__Bacteria;p__Proteobacteria;c__Gammaproteobacteria;o__Pseudomonadales;f__Moraxellaceae;g__Acinetobacter;s__Acinetobacter chinensis	97.5	0.98	d__Bacteria;p__Proteobacteria;c__Gammaproteobacteria;o__Pseudomonadales;f__Moraxellaceae;g__Acinetobacter;s__	taxonomic classification defined by topology and ANI	topological placement and ANI have congruent species assignments	GCF_001696605.3, s__Acinetobacter wuhouensis, 95.0, 80.66, 0.49; GCF_003268395.1, s__Acinetobacter sp003268395, 95.0, 79.81, 0.43; GCF_902753875.1, s__Acinetobacter bouvetii_A, 95.0, 79.5, 0.41; GCF_003024515.2, s__Acinetobacter sp003024515, 95.0, 79.48, 0.39; GCF_004152775.1, s__Acinetobacter piscicola_A, 95.0, 79.22, 0.39; GCF_000214135.1, s__Acinetobacter sp000214135, 95.0, 79.17, 0.36; GCF_90…	50.31
ASISGE4bin.40	XM6_ASISGE4	cultivable	59.98	3.448	4.63632	N/A	d__Bacteria;p__Proteobacteria;c__Gammaproteobacteria;o__Pseudomonadales;f__Moraxellaceae;g__Acinetobacter;s__Acinetobacter bouvetii	GCF_000368865.1	95	d__Bacteria;p__Proteobacteria;c__Gammaproteobacteria;o__Pseudomonadales;f__Moraxellaceae;g__Acinetobacter;s__Acinetobacter bouvetii	96.5	0.84	GCF_000368865.1	95	d__Bacteria;p__Proteobacteria;c__Gammaproteobacteria;o__Pseudomonadales;f__Moraxellaceae;g__Acinetobacter;s__Acinetobacter bouvetii	96.5	0.84	d__Bacteria;p__Proteobacteria;c__Gammaproteobacteria;o__Pseudomonadales;f__Moraxellaceae;g__Acinetobacter;s__	taxonomic classification defined by topology and ANI	topological placement and ANI have congruent species assignments	GCF_001605895.1, s__Acinetobacter pragensis, 95.0, 84.75, 0.72; GCF_002135435.1, s__Acinetobacter sp002135435, 95.0, 83.28, 0.74; GCF_001696615.3, s__Acinetobacter sp001696615, 95.0, 81.65, 0.65; GCF_002135245.1, s__Acinetobacter sp002135245, 95.0, 80.88, 0.45; GCF_003611465.1, s__Acinetobacter sp003611465, 95.0, 80.75, 0.52; GCF_001707755.1, s__Acinetobacter celticus, 95.0, 80.63, 0.52; GCF_9000…	41.27
ASISGE4bin.5	XM6_ASISGE4	cultivable	82.46	3.308	5.03514	0.937795	d__Bacteria;p__Bacteroidota;c__Bacteroidia;o__Flavobacteriales;f__Weeksellaceae;g__;s__	N/A	N/A	N/A	N/A	N/A	N/A	N/A	N/A	N/A	N/A	d__Bacteria;p__Bacteroidota;c__Bacteroidia;o__Flavobacteriales;f__Weeksellaceae;g__;s__	taxonomic classification fully defined by topology	N/A	N/A	58.57
ASISGE4bin.6	XM6_ASISGE4	cultivable	90.89	2.489	7.6204	0.970399	d__Bacteria;p__Proteobacteria;c__Alphaproteobacteria;o__Caulobacterales;f__Hyphomonadaceae;g__Terricaulis;s__	N/A	N/A	N/A	N/A	N/A	GCA_011332235.1	95	d__Bacteria;p__Proteobacteria;c__Alphaproteobacteria;o__Caulobacterales;f__Hyphomonadaceae;g__Terricaulis;s__Terricaulis sp011332235	78.7	0.4	d__Bacteria;p__Proteobacteria;c__Alphaproteobacteria;o__Caulobacterales;f__Hyphomonadaceae;g__Terricaulis;s__	taxonomic classification defined by topology and ANI	N/A	GCA_900696695.1, s__Terricaulis sp900696695, 95.0, 81.31, 0.6; GCA_002083515.1, s__Terricaulis sp002083515, 95.0, 79.93, 0.45; GCA_003242075.1, s__Terricaulis sp003242075, 95.0, 79.82, 0.51; GCF_004634425.1, s__Terricaulis sp004634425, 95.0, 79.75, 0.57; GCA_014378995.1, s__Terricaulis sp014378995, 95.0, 79.71, 0.54; GCF_009792355.1, s__Terricaulis silvestris, 95.0, 79.69, 0.55; GCA_001464425.1, …	80.7
ASISGE4bin.7	XM6_ASISGE4	cultivable	93.53	2.397	9.46577	0.857464	d__Bacteria;p__Acidobacteriota;c__Blastocatellia;o__RBC074;f__RBC074;g__RBC074;s__	N/A	N/A	N/A	N/A	N/A	GCA_902825875.1	95	d__Bacteria;p__Acidobacteriota;c__Blastocatellia;o__RBC074;f__RBC074;g__RBC074;s__RBC074 sp902825875	78.22	0.32	d__Bacteria;p__Acidobacteriota;c__Blastocatellia;o__RBC074;f__RBC074;g__;s__	taxonomic classification defined by topology and ANI	N/A	N/A	93.83
ASISGE4bin.8	XM6_ASISGE4	cultivable	95.33	0.706	12.5041	0.986015	d__Bacteria;p__Bacteroidota;c__Bacteroidia;o__Flavobacteriales;f__Flavobacteriaceae;g__Flavobacterium;s__	N/A	N/A	N/A	N/A	N/A	GCA_014642275.1	95	d__Bacteria;p__Bacteroidota;c__Bacteroidia;o__Flavobacteriales;f__Flavobacteriaceae;g__Flavobacterium;s__Flavobacterium lutivivi	85.64	0.75	d__Bacteria;p__Bacteroidota;c__Bacteroidia;o__Flavobacteriales;f__Flavobacteriaceae;g__Flavobacterium;s__	taxonomic classification defined by topology and ANI	N/A	GCF_012911605.1, s__Flavobacterium sp012911605, 95.0, 81.22, 0.48; GCF_014486675.1, s__Flavobacterium macrobrachii, 95.0, 80.42, 0.47; GCF_004362665.1, s__Flavobacterium dankookense, 95.0, 79.76, 0.46; GCA_001464475.1, s__Flavobacterium sp001464475, 95.0, 79.36, 0.39; GCA_013298525.1, s__Flavobacterium sp013298525, 95.0, 79.34, 0.33; GCA_003525665.1, s__Flavobacterium sp003525665, 95.0, 78.92, 0.…	90.83
ASISGE4bin.9	XM6_ASISGE4	cultivable	61.99	7.549	5.18427	0.996591	d__Bacteria;p__Proteobacteria;c__Alphaproteobacteria;o__Sphingomonadales;f__Sphingomonadaceae;g__Novosphingobium;s__	N/A	N/A	N/A	N/A	N/A	GCA_002256985.1	95	d__Bacteria;p__Proteobacteria;c__Alphaproteobacteria;o__Sphingomonadales;f__Sphingomonadaceae;g__Novosphingobium;s__Novosphingobium sp002256985	87.09	0.75	d__Bacteria;p__Proteobacteria;c__Alphaproteobacteria;o__Sphingomonadales;f__Sphingomonadaceae;g__Novosphingobium;s__	taxonomic classification defined by topology and ANI	N/A	GCA_002256775.1, s__Novosphingobium sp002256775, 95.0, 83.06, 0.58; GCF_012641335.1, s__Novosphingobium sp012641335, 95.0, 82.69, 0.65; GCF_003454795.1, s__Novosphingobium sp003454795, 95.0, 81.49, 0.6; GCF_007830315.1, s__Novosphingobium taihuense, 95.0, 81.43, 0.59; GCF_000807925.1, s__Novosphingobium subterraneum, 95.0, 81.13, 0.59; GCF_900176395.1, s__Novosphingobium sp900176395, 95.0, 81.11,…	44.25
NJASGE1bin.1	NJ_NJASGE1	cultivable	99.76	0.926	16.2102	0.983698	d__Bacteria;p__Proteobacteria;c__Alphaproteobacteria;o__Sphingomonadales;f__Sphingomonadaceae;g__Novosphingobium;s__	N/A	N/A	N/A	N/A	N/A	GCA_002440635.1	95	d__Bacteria;p__Proteobacteria;c__Alphaproteobacteria;o__Sphingomonadales;f__Sphingomonadaceae;g__Novosphingobium;s__Novosphingobium sp002440635	82.59	0.71	d__Bacteria;p__Proteobacteria;c__Alphaproteobacteria;o__Sphingomonadales;f__Sphingomonadaceae;g__Novosphingobium;s__	taxonomic classification defined by topology and ANI	N/A	GCA_014652615.1, s__Novosphingobium arvoryzae, 95.0, 81.94, 0.67; GCA_009926135.1, s__Novosphingobium sp009926135, 95.0, 81.31, 0.61; GCF_007954425.1, s__Novosphingobium ginsenosidimutans, 95.0, 81.11, 0.61; GCA_002454125.1, s__Novosphingobium sp002454125, 95.0, 81.04, 0.58; GCF_002813245.1, s__Novosphingobium kunmingense, 95.0, 80.93, 0.62; GCA_013822005.1, s__Novosphingobium sp013822005, 95.0, …	97.12
NJASGE1bin.10	NJ_NJASGE1	cultivable	98.59	1.09	19.4942	0.9684	d__Bacteria;p__Proteobacteria;c__Gammaproteobacteria;o__Burkholderiales;f__Burkholderiaceae;g__PNNH01;s__	N/A	N/A	N/A	N/A	N/A	GCA_013824165.1	95	d__Bacteria;p__Proteobacteria;c__Gammaproteobacteria;o__Burkholderiales;f__Burkholderiaceae;g__PNNH01;s__PNNH01 sp013824165	83.07	0.64	d__Bacteria;p__Proteobacteria;c__Gammaproteobacteria;o__Burkholderiales;f__Burkholderiaceae;g__;s__	taxonomic classification defined by topology and ANI	N/A	N/A	92.67
NJASGE1bin.12	NJ_NJASGE1	cultivable	100	5.038	33.8358	0.991006	d__Bacteria;p__Proteobacteria;c__Gammaproteobacteria;o__Burkholderiales;f__Burkholderiaceae;g__WAJ17;s__	N/A	N/A	N/A	N/A	N/A	GCF_014174515.1	95	d__Bacteria;p__Proteobacteria;c__Gammaproteobacteria;o__Burkholderiales;f__Burkholderiaceae;g__WAJ17;s__WAJ17 sp014174515	91.58	0.85	d__Bacteria;p__Proteobacteria;c__Gammaproteobacteria;o__Burkholderiales;f__Burkholderiaceae;g__;s__	taxonomic classification defined by topology and ANI	N/A	N/A	95.99
NJASGE1bin.13	NJ_NJASGE1	cultivable	96.15	0	27.2897	N/A	d__Bacteria;p__Proteobacteria;c__Gammaproteobacteria;o__Burkholderiales;f__Chromobacteriaceae;g__Vogesella;s__Vogesella indigofera	GCF_003633895.1	95	d__Bacteria;p__Proteobacteria;c__Gammaproteobacteria;o__Burkholderiales;f__Chromobacteriaceae;g__Vogesella;s__Vogesella indigofera	97.35	0.92	GCF_003633895.1	95	d__Bacteria;p__Proteobacteria;c__Gammaproteobacteria;o__Burkholderiales;f__Chromobacteriaceae;g__Vogesella;s__Vogesella indigofera	97.35	0.92	d__Bacteria;p__Proteobacteria;c__Gammaproteobacteria;o__Burkholderiales;f__Chromobacteriaceae;g__Vogesella;s__	taxonomic classification defined by topology and ANI	topological placement and ANI have congruent species assignments	GCA_014652475.1, s__Vogesella alkaliphila, 95.0, 94.47, 0.88; GCA_014652335.1, s__Vogesella fluminis, 95.0, 93.16, 0.82; GCF_900090205.1, s__Vogesella sp900090205, 95.0, 83.98, 0.72; GCF_902829295.1, s__Vogesella oryzae, 95.0, 83.77, 0.66; GCF_007644045.2, s__Vogesella urethralis, 95.0, 83.19, 0.67; GCF_000335715.1, s__Vogesella sp000335715, 95.0, 82.26, 0.59	77.84
NJASGE1bin.14	NJ_NJASGE1	cultivable	59.96	9.649	14.0539	0.934486	d__Bacteria;p__Proteobacteria;c__Alphaproteobacteria;o__Dongiales;f__Dongiaceae;g__Dongia;s__	N/A	N/A	N/A	N/A	N/A	GCF_004363235.1	95	d__Bacteria;p__Proteobacteria;c__Alphaproteobacteria;o__Dongiales;f__Dongiaceae;g__Dongia;s__Dongia mobilis	80.22	0.59	d__Bacteria;p__Proteobacteria;c__Alphaproteobacteria;o__Dongiales;f__Dongiaceae;g__Dongia;s__	taxonomic classification defined by topology and ANI	N/A	GCF_000620685.1, s__Dongia sp000620685, 95.0, 77.65, 0.32	45.58
NJASGE1bin.15	NJ_NJASGE1	cultivable	81.68	4.138	13.4534	0.898611	d__Bacteria;p__Proteobacteria;c__Gammaproteobacteria;o__Burkholderiales;f__Burkholderiaceae;g__;s__	N/A	N/A	N/A	N/A	N/A	N/A	N/A	N/A	N/A	N/A	d__Bacteria;p__Proteobacteria;c__Gammaproteobacteria;o__Burkholderiales;f__Burkholderiaceae;g__;s__	taxonomic classification fully defined by topology	N/A	N/A	80.19
NJASGE1bin.16	NJ_NJASGE1	cultivable	99.37	0	66.5484	0.966836	d__Bacteria;p__Proteobacteria;c__Gammaproteobacteria;o__Burkholderiales;f__Burkholderiaceae;g__Hydrogenophaga;s__	N/A	N/A	N/A	N/A	N/A	N/A	N/A	N/A	N/A	N/A	d__Bacteria;p__Proteobacteria;c__Gammaproteobacteria;o__Burkholderiales;f__Burkholderiaceae;g__Hydrogenophaga;s__	taxonomic classification defined by topology and ANI	N/A	GCF_001592285.1, s__Hydrogenophaga pseudoflava, 95.0, 83.7, 0.68; GCF_001571145.1, s__Hydrogenophaga flava, 95.0, 83.24, 0.67; GCA_006227825.1, s__Hydrogenophaga sp006227825, 95.0, 82.67, 0.7; GCF_002127215.1, s__Hydrogenophaga sp002127215, 95.0, 82.28, 0.62; GCF_001592305.1, s__Hydrogenophaga taeniospiralis, 95.0, 82.09, 0.63; GCA_001770905.1, s__Hydrogenophaga sp001770905, 95.0, 81.94, 0.6; GCA…	98.41
NJASGE1bin.17	NJ_NJASGE1	cultivable	99.75	1.401	45.3736	0.976904	d__Bacteria;p__Proteobacteria;c__Gammaproteobacteria;o__Burkholderiales;f__Burkholderiaceae;g__Piscinibacter;s__	N/A	N/A	N/A	N/A	N/A	GCA_007994965.1	95	d__Bacteria;p__Proteobacteria;c__Gammaproteobacteria;o__Burkholderiales;f__Burkholderiaceae;g__Piscinibacter;s__Piscinibacter aquaticus	88.22	0.73	d__Bacteria;p__Proteobacteria;c__Gammaproteobacteria;o__Burkholderiales;f__Burkholderiaceae;g__Piscinibacter;s__	taxonomic classification defined by topology and ANI	N/A	GCA_003265685.1, s__Piscinibacter caeni, 95.0, 86.1, 0.68; GCF_004011805.1, s__Piscinibacter defluvii, 95.0, 85.92, 0.72	97.4
NJASGE1bin.18	NJ_NJASGE1	cultivable	75	8.62	19.5473	0.981729	d__Bacteria;p__Proteobacteria;c__Alphaproteobacteria;o__Rhodobacterales;f__Rhodobacteraceae;g__Paracoccus;s__	N/A	N/A	N/A	N/A	N/A	GCF_003337565.1	95	d__Bacteria;p__Proteobacteria;c__Alphaproteobacteria;o__Rhodobacterales;f__Rhodobacteraceae;g__Paracoccus;s__Paracoccus lutimaris	88.67	0.78	d__Bacteria;p__Proteobacteria;c__Alphaproteobacteria;o__Rhodobacterales;f__Rhodobacteraceae;g__Paracoccus;s__	taxonomic classification defined by topology and ANI	N/A	GCF_000763905.1, s__Paracoccus halophilus, 95.0, 84.78, 0.66; GCF_000518925.1, s__Paracoccus sp000518925, 95.0, 84.5, 0.67; GCF_900156255.1, s__Paracoccus thiocyanatus, 95.0, 84.44, 0.6; GCF_000763885.1, s__Paracoccus versutus, 95.0, 84.35, 0.66; GCF_008824185.1, s__Paracoccus pantotrophus, 95.0, 84.33, 0.68; GCF_900100045.1, s__Paracoccus denitrificans, 95.0, 84.28, 0.68; GCF_001447385.1, s__Par…	66.45
NJASGE1bin.19	NJ_NJASGE1	cultivable	57.75	7.758	14.009	0.99847	d__Bacteria;p__Bacteroidota;c__Bacteroidia;o__Flavobacteriales;f__Weeksellaceae;g__Cloacibacterium;s__	N/A	N/A	N/A	N/A	N/A	GCA_002422665.1	95	d__Bacteria;p__Bacteroidota;c__Bacteroidia;o__Flavobacteriales;f__Weeksellaceae;g__Cloacibacterium;s__Cloacibacterium sp002422665	94.17	0.82	d__Bacteria;p__Bacteroidota;c__Bacteroidia;o__Flavobacteriales;f__Weeksellaceae;g__Cloacibacterium;s__	taxonomic classification defined by topology and ANI	N/A	GCF_003860565.1, s__Cloacibacterium normanense, 95.0, 94.31, 0.79; GCA_014645495.1, s__Cloacibacterium rupense, 95.0, 82.3, 0.61; GCA_002337005.1, s__Cloacibacterium sp002337005, 95.0, 82.08, 0.64	43.24
NJASGE1bin.2	NJ_NJASGE1	cultivable	99.43	0.172	67.2345	0.99213	d__Bacteria;p__Proteobacteria;c__Gammaproteobacteria;o__Xanthomonadales;f__Xanthomonadaceae;g__Pseudoxanthomonas_A;s__	N/A	N/A	N/A	N/A	N/A	GCF_010093345.1	95	d__Bacteria;p__Proteobacteria;c__Gammaproteobacteria;o__Xanthomonadales;f__Xanthomonadaceae;g__Pseudoxanthomonas_A;s__Pseudoxanthomonas_A yeongjuensis	89.2	0.8	d__Bacteria;p__Proteobacteria;c__Gammaproteobacteria;o__Xanthomonadales;f__Xanthomonadaceae;g__Pseudoxanthomonas_A;s__	taxonomic classification defined by topology and ANI	N/A	GCF_010093305.1, s__Pseudoxanthomonas_A sacheonensis, 95.0, 84.23, 0.74; GCF_900104085.1, s__Pseudoxanthomonas_A sp900104085, 95.0, 84.18, 0.75; GCF_010119615.1, s__Pseudoxanthomonas_A gei, 95.0, 84.15, 0.7; GCA_004173415.1, s__Pseudoxanthomonas_A sp004173415, 95.0, 83.67, 0.78; GCF_010211755.1, s__Pseudoxanthomonas_A sangjuensis, 95.0, 82.08, 0.64; GCF_900215535.1, s__Pseudoxanthomonas_A wuyuane…	91.88
NJASGE1bin.20	NJ_NJASGE1	cultivable	89.36	3.084	15.0967	0.995506	d__Bacteria;p__Proteobacteria;c__Alphaproteobacteria;o__Caulobacterales;f__Caulobacteraceae;g__Phenylobacterium;s__	N/A	N/A	N/A	N/A	N/A	GCA_001724985.1	95	d__Bacteria;p__Proteobacteria;c__Alphaproteobacteria;o__Caulobacterales;f__Caulobacteraceae;g__Phenylobacterium;s__Phenylobacterium sp001724985	93.66	0.81	d__Bacteria;p__Proteobacteria;c__Alphaproteobacteria;o__Caulobacterales;f__Caulobacteraceae;g__Phenylobacterium;s__	taxonomic classification defined by topology and ANI	N/A	GCA_013822795.1, s__Phenylobacterium sp013822795, 95.0, 85.31, 0.75; GCF_001425305.1, s__Phenylobacterium sp001425305, 95.0, 85.0, 0.77; GCF_014196295.1, s__Phenylobacterium haematophilum, 95.0, 84.88, 0.77; GCF_001429025.1, s__Phenylobacterium sp001429025, 95.0, 83.73, 0.75; GCF_003254505.1, s__Phenylobacterium hankyongense, 95.0, 81.53, 0.55; GCA_013911965.1, s__Phenylobacterium sp013911965, 95…	79.31
NJASGE1bin.21	NJ_NJASGE1	cultivable	96.83	1.709	22.3848	0.987555	d__Bacteria;p__Proteobacteria;c__Alphaproteobacteria;o__Caulobacterales;f__Caulobacteraceae;g__Phenylobacterium;s__	N/A	N/A	N/A	N/A	N/A	GCA_001724985.1	95	d__Bacteria;p__Proteobacteria;c__Alphaproteobacteria;o__Caulobacterales;f__Caulobacteraceae;g__Phenylobacterium;s__Phenylobacterium sp001724985	88.05	0.82	d__Bacteria;p__Proteobacteria;c__Alphaproteobacteria;o__Caulobacterales;f__Caulobacteraceae;g__Phenylobacterium;s__	taxonomic classification defined by topology and ANI	N/A	GCA_013822795.1, s__Phenylobacterium sp013822795, 95.0, 85.2, 0.73; GCF_014196295.1, s__Phenylobacterium haematophilum, 95.0, 85.09, 0.73; GCF_001425305.1, s__Phenylobacterium sp001425305, 95.0, 84.89, 0.73; GCF_001429025.1, s__Phenylobacterium sp001429025, 95.0, 83.68, 0.7; GCF_003254505.1, s__Phenylobacterium hankyongense, 95.0, 81.12, 0.52; GCA_013911965.1, s__Phenylobacterium sp013911965, 95.…	90.97
NJASGE1bin.22	NJ_NJASGE1	cultivable	81.12	1.464	345.097	0.995328	d__Bacteria;p__Proteobacteria;c__Gammaproteobacteria;o__Burkholderiales;f__Burkholderiaceae;g__Giesbergeria;s__	N/A	N/A	N/A	N/A	N/A	GCF_010020825.1	95	d__Bacteria;p__Proteobacteria;c__Gammaproteobacteria;o__Burkholderiales;f__Burkholderiaceae;g__Giesbergeria;s__Giesbergeria sp010020825	90.73	0.86	d__Bacteria;p__Proteobacteria;c__Gammaproteobacteria;o__Burkholderiales;f__Burkholderiaceae;g__Giesbergeria;s__	taxonomic classification defined by topology and ANI	N/A	GCF_003604195.1, s__Giesbergeria lacusdiani, 95.0, 85.68, 0.77; GCF_000739995.1, s__Giesbergeria granuli, 95.0, 85.63, 0.75; GCA_001770955.1, s__Giesbergeria sp001770955, 95.0, 84.58, 0.73; GCF_003096555.1, s__Giesbergeria sp003096555, 95.0, 82.41, 0.69; GCF_012932145.1, s__Giesbergeria sp012932145, 95.0, 82.21, 0.58; GCA_001724785.1, s__Giesbergeria sp001724785, 95.0, 81.69, 0.49; GCF_004341365.…	81.16
NJASGE1bin.23	NJ_NJASGE1	cultivable	75.38	3.228	8.90686	0.986531	d__Bacteria;p__Proteobacteria;c__Alphaproteobacteria;o__Sphingomonadales;f__Sphingomonadaceae;g__Qipengyuania;s__	N/A	N/A	N/A	N/A	N/A	GCF_004358425.1	95	d__Bacteria;p__Proteobacteria;c__Alphaproteobacteria;o__Sphingomonadales;f__Sphingomonadaceae;g__Qipengyuania;s__Qipengyuania sediminis	80.83	0.67	d__Bacteria;p__Proteobacteria;c__Alphaproteobacteria;o__Sphingomonadales;f__Sphingomonadaceae;g__Qipengyuania;s__	taxonomic classification defined by topology and ANI	N/A	GCF_009828025.1, s__Qipengyuania algicida, 95.0, 78.97, 0.48	53.96
NJASGE1bin.24	NJ_NJASGE1	cultivable	87.22	4.666	24.5725	0.971714	d__Bacteria;p__Proteobacteria;c__Alphaproteobacteria;o__Rhodobacterales;f__Rhodobacteraceae;g__Tabrizicola;s__	N/A	N/A	N/A	N/A	N/A	N/A	N/A	N/A	N/A	N/A	d__Bacteria;p__Proteobacteria;c__Alphaproteobacteria;o__Rhodobacterales;f__Rhodobacteraceae;g__Tabrizicola;s__	taxonomic classification defined by topology and ANI	N/A	GCF_008271465.1, s__Tabrizicola flagellatus, 95.0, 84.16, 0.63; GCF_003574395.1, s__Tabrizicola thermarum, 95.0, 84.11, 0.64; GCF_005222785.1, s__Tabrizicola sp005222785, 95.0, 83.96, 0.68; GCF_011174775.1, s__Tabrizicola sp011174775, 95.0, 83.81, 0.63; GCA_013824055.1, s__Tabrizicola sp013824055, 95.0, 83.73, 0.62; GCA_002280405.1, s__Tabrizicola sp002280405, 95.0, 83.09, 0.57; GCF_002900975.1, …	74.93
NJASGE1bin.25	NJ_NJASGE1	cultivable	96.84	0.632	75.5859	0.978558	d__Bacteria;p__Proteobacteria;c__Gammaproteobacteria;o__Xanthomonadales;f__Xanthomonadaceae;g__SCMT01;s__	N/A	N/A	N/A	N/A	N/A	GCA_011526085.1	95	d__Bacteria;p__Proteobacteria;c__Gammaproteobacteria;o__Xanthomonadales;f__Xanthomonadaceae;g__SCMT01;s__SCMT01 sp011526085	86.72	0.74	d__Bacteria;p__Proteobacteria;c__Gammaproteobacteria;o__Xanthomonadales;f__Xanthomonadaceae;g__SCMT01;s__	taxonomic classification defined by topology and ANI	N/A	GCF_005502915.1, s__SCMT01 sp005502915, 95.0, 83.78, 0.63; GCA_013141175.1, s__SCMT01 sp013141175, 95.0, 83.21, 0.67; GCA_008015835.1, s__SCMT01 sp008015835, 95.0, 81.41, 0.59; GCA_008015095.1, s__SCMT01 sp008015095, 95.0, 79.47, 0.48	93.79
NJASGE1bin.26	NJ_NJASGE1	cultivable	74.73	1.754	11.2276	N/A	d__Bacteria;p__Proteobacteria;c__Gammaproteobacteria;o__Burkholderiales;f__Rhodocyclaceae;g__Azospira;s__Azospira suillum	GCF_004217225.1	95	d__Bacteria;p__Proteobacteria;c__Gammaproteobacteria;o__Burkholderiales;f__Rhodocyclaceae;g__Azospira;s__Azospira suillum	98.35	0.99	GCF_004217225.1	95	d__Bacteria;p__Proteobacteria;c__Gammaproteobacteria;o__Burkholderiales;f__Rhodocyclaceae;g__Azospira;s__Azospira suillum	98.35	0.99	d__Bacteria;p__Proteobacteria;c__Gammaproteobacteria;o__Burkholderiales;f__Rhodocyclaceae;g__Azospira;s__	taxonomic classification defined by topology and ANI	topological placement and ANI have congruent species assignments	GCF_003112695.1, s__Azospira sp003112695, 95.0, 87.85, 0.84	59.28
NJASGE1bin.27	NJ_NJASGE1	cultivable	65.51	0	9.9637	0.931588	d__Bacteria;p__Proteobacteria;c__Gammaproteobacteria;o__Xanthomonadales;f__Xanthomonadaceae;g__Arenimonas;s__	N/A	N/A	N/A	N/A	N/A	GCF_008386465.1	95	d__Bacteria;p__Proteobacteria;c__Gammaproteobacteria;o__Xanthomonadales;f__Xanthomonadaceae;g__Arenimonas;s__Arenimonas sp008386465	83.45	0.78	d__Bacteria;p__Proteobacteria;c__Gammaproteobacteria;o__Xanthomonadales;f__Xanthomonadaceae;g__Arenimonas;s__	taxonomic classification defined by topology and ANI	N/A	GCF_000747075.1, s__Arenimonas malthae, 95.0, 85.41, 0.8; GCF_003024235.1, s__Arenimonas caeni, 95.0, 85.25, 0.8; GCA_001724815.1, s__Arenimonas sp001724815, 95.0, 85.25, 0.83; GCF_000747155.1, s__Arenimonas metalli, 95.0, 84.92, 0.8; GCF_006265115.1, s__Arenimonas terrae, 95.0, 84.67, 0.84; GCF_007993735.1, s__Arenimonas daejeonensis, 95.0, 84.09, 0.8; GCA_003497545.1, s__Arenimonas sp003497545,…	57.89
NJASGE1bin.28	NJ_NJASGE1	cultivable	97.98	0.654	25.7877	N/A	d__Bacteria;p__Proteobacteria;c__Gammaproteobacteria;o__Pseudomonadales;f__Pseudomonadaceae;g__Pseudomonas_E;s__Pseudomonas_E hunanensis	GCF_003671955.1	95	d__Bacteria;p__Proteobacteria;c__Gammaproteobacteria;o__Pseudomonadales;f__Pseudomonadaceae;g__Pseudomonas_E;s__Pseudomonas_E hunanensis	95.42	0.88	GCF_003671955.1	95	d__Bacteria;p__Proteobacteria;c__Gammaproteobacteria;o__Pseudomonadales;f__Pseudomonadaceae;g__Pseudomonas_E;s__Pseudomonas_E hunanensis	95.42	0.88	d__Bacteria;p__Proteobacteria;c__Gammaproteobacteria;o__Pseudomonadales;f__Pseudomonadaceae;g__Pseudomonas_E;s__	taxonomic classification defined by topology and ANI	topological placement and ANI have congruent species assignments	GCF_013393325.1, s__Pseudomonas_E putida_P, 95.0, 90.64, 0.8; GCF_000708715.2, s__Pseudomonas_E putida_R, 95.0, 90.0, 0.8; GCF_000498395.2, s__Pseudomonas_E putida_Q, 95.0, 89.92, 0.83; GCF_000412675.1, s__Pseudomonas_E putida, 95.0, 89.86, 0.82; GCF_001642705.1, s__Pseudomonas_E sp001642705, 95.0, 89.71, 0.8; GCF_003205205.1, s__Pseudomonas_E sp003205205, 95.0, 89.67, 0.79; GCF_000935045.1, s__P…	91.32
NJASGE1bin.3	NJ_NJASGE1	cultivable	62.06	6.896	10.1951	0.9883	d__Bacteria;p__Proteobacteria;c__Gammaproteobacteria;o__Burkholderiales;f__Burkholderiaceae;g__Acidovorax;s__	N/A	N/A	N/A	N/A	N/A	GCF_000238595.1	95	d__Bacteria;p__Proteobacteria;c__Gammaproteobacteria;o__Burkholderiales;f__Burkholderiaceae;g__Acidovorax;s__Acidovorax facilis	83.88	0.65	d__Bacteria;p__Proteobacteria;c__Gammaproteobacteria;o__Burkholderiales;f__Burkholderiaceae;g__Acidovorax;s__	taxonomic classification defined by topology and ANI	N/A	GCF_003058055.1, s__Acidovorax sp003058055, 95.0, 84.94, 0.72; GCF_007993815.1, s__Acidovorax delafieldii, 95.0, 84.81, 0.72; GCF_000302535.1, s__Acidovorax sp000302535, 95.0, 84.78, 0.71; GCF_005405905.1, s__Acidovorax sp005405905, 95.0, 84.51, 0.73; GCF_013376875.1, s__Acidovorax sp001411535, 95.0, 84.44, 0.71; GCF_001633105.1, s__Acidovorax sp001633105, 95.0, 84.42, 0.72; GCF_002245625.1, s__A…	45.8
NJASGE1bin.30	NJ_NJASGE1	cultivable	99.35	0.649	30.2926	0.983618	d__Bacteria;p__Proteobacteria;c__Alphaproteobacteria;o__Caulobacterales;f__Caulobacteraceae;g__Brevundimonas;s__	N/A	N/A	N/A	N/A	N/A	N/A	N/A	N/A	N/A	N/A	d__Bacteria;p__Proteobacteria;c__Alphaproteobacteria;o__Caulobacterales;f__Caulobacteraceae;g__Brevundimonas;s__	taxonomic classification defined by topology and ANI	N/A	GCA_002483305.1, s__Brevundimonas sp002483305, 95.0, 82.46, 0.62; GCF_001427825.1, s__Brevundimonas sp001427825, 95.0, 82.34, 0.67; GCF_000335735.1, s__Brevundimonas sp000335735, 95.0, 82.27, 0.63; GCA_004296955.1, s__Brevundimonas sp004296955, 95.0, 82.13, 0.68; GCF_011927945.1, s__Brevundimonas alba, 95.0, 81.68, 0.67; GCA_006515835.1, s__Brevundimonas sp006515835, 95.0, 81.64, 0.66; GCF_001425…	85.61
NJASGE1bin.31	NJ_NJASGE1	cultivable	97.84	0.344	24.5899	0.989296	d__Bacteria;p__Proteobacteria;c__Gammaproteobacteria;o__Xanthomonadales;f__Xanthomonadaceae;g__Arenimonas;s__	N/A	N/A	N/A	N/A	N/A	GCA_014643775.1	95	d__Bacteria;p__Proteobacteria;c__Gammaproteobacteria;o__Xanthomonadales;f__Xanthomonadaceae;g__Arenimonas;s__Arenimonas soli	90.31	0.88	d__Bacteria;p__Proteobacteria;c__Gammaproteobacteria;o__Xanthomonadales;f__Xanthomonadaceae;g__Arenimonas;s__	taxonomic classification defined by topology and ANI	N/A	GCF_000743535.1, s__Arenimonas donghaensis, 95.0, 88.05, 0.85; GCA_001724815.1, s__Arenimonas sp001724815, 95.0, 87.02, 0.79; GCF_003024235.1, s__Arenimonas caeni, 95.0, 86.99, 0.82; GCF_000747075.1, s__Arenimonas malthae, 95.0, 86.86, 0.75; GCA_003497545.1, s__Arenimonas sp003497545, 95.0, 85.97, 0.77; GCF_000747155.1, s__Arenimonas metalli, 95.0, 85.21, 0.79; GCF_006265115.1, s__Arenimonas terr…	86.84
NJASGE1bin.32	NJ_NJASGE1	cultivable	99.24	0.894	33.737	0.99484	d__Bacteria;p__Proteobacteria;c__Gammaproteobacteria;o__Pseudomonadales;f__Moraxellaceae;g__Acinetobacter;s__	N/A	N/A	N/A	N/A	N/A	GCF_002135435.1	95	d__Bacteria;p__Proteobacteria;c__Gammaproteobacteria;o__Pseudomonadales;f__Moraxellaceae;g__Acinetobacter;s__Acinetobacter sp002135435	84.92	0.74	d__Bacteria;p__Proteobacteria;c__Gammaproteobacteria;o__Pseudomonadales;f__Moraxellaceae;g__Acinetobacter;s__	taxonomic classification defined by topology and ANI	N/A	GCF_000368865.1, s__Acinetobacter bouvetii, 95.0, 84.5, 0.74; GCF_001605895.1, s__Acinetobacter pragensis, 95.0, 83.77, 0.71; GCF_001696615.3, s__Acinetobacter sp001696615, 95.0, 82.13, 0.66; GCF_003611465.1, s__Acinetobacter sp003611465, 95.0, 81.59, 0.59; GCF_002135295.1, s__Acinetobacter sp002135295, 95.0, 81.49, 0.51; GCF_002018365.1, s__Acinetobacter sp002018365, 95.0, 81.26, 0.47; GCF_00302…	95.22
NJASGE1bin.33	NJ_NJASGE1	cultivable	52.58	5.172	21.1017	0.943154	d__Bacteria;p__Proteobacteria;c__Gammaproteobacteria;o__Burkholderiales;f__Rhodocyclaceae;g__Azonexus;s__	N/A	N/A	N/A	N/A	N/A	GCA_004379165.1	95	d__Bacteria;p__Proteobacteria;c__Gammaproteobacteria;o__Burkholderiales;f__Rhodocyclaceae;g__Azonexus;s__Azonexus sp004379165	81.47	0.54	d__Bacteria;p__Proteobacteria;c__Gammaproteobacteria;o__Burkholderiales;f__Rhodocyclaceae;g__Azonexus;s__	taxonomic classification defined by topology and ANI	N/A	GCF_000519045.1, s__Azonexus agitatus, 95.0, 82.76, 0.59; GCF_008711155.1, s__Azonexus sp008711155, 95.0, 82.42, 0.59; GCF_009469585.1, s__Azonexus sp009469585, 95.0, 82.23, 0.58; GCF_009469765.1, s__Azonexus hortensis, 95.0, 82.23, 0.63; GCF_001551835.1, s__Azonexus denitrificans, 95.0, 82.16, 0.64; GCF_009469615.1, s__Azonexus sp009469615, 95.0, 82.14, 0.56; GCA_002470165.1, s__Azonexus sp00247…	53.84
NJASGE1bin.34	NJ_NJASGE1	cultivable	68.96	0	10.3772	0.965202	d__Bacteria;p__Proteobacteria;c__Alphaproteobacteria;o__Sphingomonadales;f__Sphingomonadaceae;g__Sandaracinobacter;s__	N/A	N/A	N/A	N/A	N/A	N/A	N/A	N/A	N/A	N/A	d__Bacteria;p__Proteobacteria;c__Alphaproteobacteria;o__Sphingomonadales;f__Sphingomonadaceae;g__Sandaracinobacter;s__	taxonomic classification defined by topology and ANI	N/A	GCA_003248865.1, s__Sandaracinobacter sp003248865, 95.0, 84.12, 0.78; GCF_006385875.1, s__Sandaracinobacter neustonicus, 95.0, 83.6, 0.82; GCA_002422985.1, s__Sandaracinobacter sp002422985, 95.0, 78.74, 0.39	60.63
NJASGE1bin.35	NJ_NJASGE1	cultivable	81.03	5.172	24.0013	N/A	d__Bacteria;p__Proteobacteria;c__Gammaproteobacteria;o__Enterobacterales;f__Aeromonadaceae;g__Aeromonas;s__Aeromonas hydrophila	GCF_000014805.1	95	d__Bacteria;p__Proteobacteria;c__Gammaproteobacteria;o__Enterobacterales;f__Aeromonadaceae;g__Aeromonas;s__Aeromonas hydrophila	96.87	0.93	GCF_000014805.1	95	d__Bacteria;p__Proteobacteria;c__Gammaproteobacteria;o__Enterobacterales;f__Aeromonadaceae;g__Aeromonas;s__Aeromonas hydrophila	96.87	0.93	d__Bacteria;p__Proteobacteria;c__Gammaproteobacteria;o__Enterobacterales;f__Aeromonadaceae;g__Aeromonas;s__	taxonomic classification defined by topology and ANI	topological placement and ANI have congruent species assignments	GCF_000820305.1, s__Aeromonas dhakensis, 95.0, 93.73, 0.87; GCF_000819745.1, s__Aeromonas bestiarum, 95.5033, 90.25, 0.87; GCF_000820005.1, s__Aeromonas piscicola, 95.5033, 89.65, 0.86; GCF_000820085.1, s__Aeromonas sanarellii, 95.0, 88.82, 0.75; GCF_000819785.1, s__Aeromonas caviae, 95.0, 88.77, 0.77; GCF_000820165.1, s__Aeromonas taiwanensis, 95.0, 88.57, 0.75; GCF_000820025.1, s__Aeromonas pop…	69.07
NJASGE1bin.36	NJ_NJASGE1	cultivable	91.66	1.592	40.4107	0.906108	d__Bacteria;p__Proteobacteria;c__Alphaproteobacteria;o__Rhodospirillales;f__Rhodospirillaceae;g__;s__	N/A	N/A	N/A	N/A	N/A	N/A	N/A	N/A	N/A	N/A	d__Bacteria;p__Proteobacteria;c__Alphaproteobacteria;o__Rhodospirillales;f__Rhodospirillaceae;g__;s__	taxonomic novelty determined using RED	N/A	N/A	81.44
NJASGE1bin.37	NJ_NJASGE1	cultivable	84.81	2.06	12.0186	0.979257	d__Bacteria;p__Proteobacteria;c__Gammaproteobacteria;o__Xanthomonadales;f__Xanthomonadaceae;g__SCMT01;s__	N/A	N/A	N/A	N/A	N/A	GCA_011526085.1	95	d__Bacteria;p__Proteobacteria;c__Gammaproteobacteria;o__Xanthomonadales;f__Xanthomonadaceae;g__SCMT01;s__SCMT01 sp011526085	85.84	0.77	d__Bacteria;p__Proteobacteria;c__Gammaproteobacteria;o__Xanthomonadales;f__Xanthomonadaceae;g__SCMT01;s__	taxonomic classification defined by topology and ANI	N/A	GCF_005502915.1, s__SCMT01 sp005502915, 95.0, 83.08, 0.7; GCA_013141175.1, s__SCMT01 sp013141175, 95.0, 82.49, 0.71; GCA_008015835.1, s__SCMT01 sp008015835, 95.0, 81.09, 0.62; GCA_008015095.1, s__SCMT01 sp008015095, 95.0, 79.24, 0.38	63.11
NJASGE1bin.39	NJ_NJASGE1	cultivable	89.3	5.904	8.9259	N/A	d__Bacteria;p__Proteobacteria;c__Gammaproteobacteria;o__Pseudomonadales;f__Moraxellaceae;g__Acinetobacter;s__Acinetobacter towneri	GCF_000368785.1	95	d__Bacteria;p__Proteobacteria;c__Gammaproteobacteria;o__Pseudomonadales;f__Moraxellaceae;g__Acinetobacter;s__Acinetobacter towneri	97.62	0.76	GCF_000368785.1	95	d__Bacteria;p__Proteobacteria;c__Gammaproteobacteria;o__Pseudomonadales;f__Moraxellaceae;g__Acinetobacter;s__Acinetobacter towneri	97.62	0.76	d__Bacteria;p__Proteobacteria;c__Gammaproteobacteria;o__Pseudomonadales;f__Moraxellaceae;g__Acinetobacter;s__	taxonomic classification defined by topology and ANI	topological placement and ANI have congruent species assignments	GCF_001758345.1, s__Acinetobacter towneri_A, 95.0, 93.52, 0.73; GCA_002296655.1, s__Acinetobacter sp002296655, 95.0, 93.11, 0.7; GCF_012371325.1, s__Acinetobacter sp012371325, 95.0, 89.01, 0.73; GCF_000488255.1, s__Acinetobacter indicus, 95.0, 81.06, 0.58; GCF_002165305.2, s__Acinetobacter sp002165305, 95.0, 80.39, 0.51; GCF_902753875.1, s__Acinetobacter bouvetii_A, 95.0, 80.31, 0.49; GCF_0031050…	66.94
NJASGE1bin.4	NJ_NJASGE1	cultivable	69.82	0	16.0977	0.990238	d__Bacteria;p__Proteobacteria;c__Gammaproteobacteria;o__Xanthomonadales;f__Xanthomonadaceae;g__Thermomonas;s__	N/A	N/A	N/A	N/A	N/A	GCF_000423885.1	95	d__Bacteria;p__Proteobacteria;c__Gammaproteobacteria;o__Xanthomonadales;f__Xanthomonadaceae;g__Thermomonas;s__Thermomonas fusca	92.03	0.9	d__Bacteria;p__Proteobacteria;c__Gammaproteobacteria;o__Xanthomonadales;f__Xanthomonadaceae;g__Thermomonas;s__	taxonomic classification defined by topology and ANI	N/A	GCF_014395425.1, s__Thermomonas brevis, 95.0, 87.43, 0.84; GCF_004346265.1, s__Thermomonas haemolytica, 95.0, 85.52, 0.72; GCF_006337105.1, s__Thermomonas sp006337105, 95.0, 84.11, 0.71; GCF_014396975.1, s__Thermomonas carbonis, 95.0, 82.5, 0.71; GCF_011302915.1, s__Thermomonas sp011302915, 95.0, 82.44, 0.68; GCF_900129205.1, s__Thermomonas hydrothermalis, 95.0, 81.46, 0.57	67.88
NJASGE1bin.5	NJ_NJASGE1	cultivable	74.13	4.31	10.5681	N/A	d__Bacteria;p__Proteobacteria;c__Gammaproteobacteria;o__Burkholderiales;f__Chitinimonadaceae;g__Chitinimonas;s__Chitinimonas taiwanensis	GCF_900119825.1	95	d__Bacteria;p__Proteobacteria;c__Gammaproteobacteria;o__Burkholderiales;f__Chitinimonadaceae;g__Chitinimonas;s__Chitinimonas taiwanensis	96.7	0.97	GCF_900119825.1	95	d__Bacteria;p__Proteobacteria;c__Gammaproteobacteria;o__Burkholderiales;f__Chitinimonadaceae;g__Chitinimonas;s__Chitinimonas taiwanensis	96.7	0.97	d__Bacteria;p__Proteobacteria;c__Gammaproteobacteria;o__Burkholderiales;f__Chitinimonadaceae;g__Chitinimonas;s__	taxonomic classification defined by topology and ANI	topological placement and ANI have congruent species assignments	GCF_000428465.1, s__Chitinimonas koreensis, 95.0, 80.11, 0.65; GCF_007431345.1, s__Chitinimonas arctica, 95.0, 79.06, 0.47; GCF_002735695.1, s__Chitinimonas sp002735695, 95.0, 78.53, 0.36	63.77
NJASGE1bin.6	NJ_NJASGE1	cultivable	67.95	3.851	20.754	N/A	d__Bacteria;p__Actinobacteriota;c__Actinomycetia;o__Propionibacteriales;f__Propionibacteriaceae;g__Micropruina;s__Micropruina glycogenica	GCF_900289045.1	95	d__Bacteria;p__Actinobacteriota;c__Actinomycetia;o__Propionibacteriales;f__Propionibacteriaceae;g__Micropruina;s__Micropruina glycogenica	98.05	0.91	GCF_900289045.1	95	d__Bacteria;p__Actinobacteriota;c__Actinomycetia;o__Propionibacteriales;f__Propionibacteriaceae;g__Micropruina;s__Micropruina glycogenica	98.05	0.91	d__Bacteria;p__Actinobacteriota;c__Actinomycetia;o__Propionibacteriales;f__Propionibacteriaceae;g__Micropruina;s__	taxonomic classification defined by topology and ANI	topological placement and ANI have congruent species assignments	GCA_013693855.1, s__Micropruina sp013693855, 95.0, 78.56, 0.44	57.02
NJASGE1bin.7	NJ_NJASGE1	cultivable	98.27	2.826	38.3315	0.987445	d__Bacteria;p__Proteobacteria;c__Gammaproteobacteria;o__Xanthomonadales;f__Xanthomonadaceae;g__Thermomonas;s__	N/A	N/A	N/A	N/A	N/A	GCF_014396975.1	95	d__Bacteria;p__Proteobacteria;c__Gammaproteobacteria;o__Xanthomonadales;f__Xanthomonadaceae;g__Thermomonas;s__Thermomonas carbonis	89.01	0.84	d__Bacteria;p__Proteobacteria;c__Gammaproteobacteria;o__Xanthomonadales;f__Xanthomonadaceae;g__Thermomonas;s__	taxonomic classification defined by topology and ANI	N/A	GCF_006337105.1, s__Thermomonas sp006337105, 95.0, 85.56, 0.74; GCF_011302915.1, s__Thermomonas sp011302915, 95.0, 84.16, 0.72; GCF_014395425.1, s__Thermomonas brevis, 95.0, 83.82, 0.68; GCF_000423885.1, s__Thermomonas fusca, 95.0, 83.34, 0.64; GCF_004346265.1, s__Thermomonas haemolytica, 95.0, 82.98, 0.69; GCF_900129205.1, s__Thermomonas hydrothermalis, 95.0, 80.02, 0.57	79.35
NJASGE1bin.8	NJ_NJASGE1	cultivable	96.8	0.958	28.3031	N/A	d__Bacteria;p__Proteobacteria;c__Gammaproteobacteria;o__Pseudomonadales;f__Moraxellaceae;g__Acinetobacter;s__Acinetobacter pittii	GCF_000369045.1	95	d__Bacteria;p__Proteobacteria;c__Gammaproteobacteria;o__Pseudomonadales;f__Moraxellaceae;g__Acinetobacter;s__Acinetobacter pittii	96.32	0.87	GCF_002928115.1	95	d__Bacteria;p__Proteobacteria;c__Gammaproteobacteria;o__Pseudomonadales;f__Moraxellaceae;g__Acinetobacter;s__Acinetobacter pittii_H	94.46	0.86	d__Bacteria;p__Proteobacteria;c__Gammaproteobacteria;o__Pseudomonadales;f__Moraxellaceae;g__Acinetobacter;s__	ANI	topological placement and ANI have incongruent species assignments	GCF_013009345.1, s__Acinetobacter sp013009345, 95.0, 94.89, 0.82; GCF_001605885.1, s__Acinetobacter lactucae, 95.0, 93.44, 0.87; GCF_013344765.1, s__Acinetobacter lactucae_A, 95.0, 93.23, 0.87; GCF_000399685.1, s__Acinetobacter pittii_E, 95.0, 92.62, 0.83; GCF_000196795.1, s__Acinetobacter oleivorans, 95.0, 91.77, 0.9; GCF_000313935.1, s__Acinetobacter sp000313935, 95.0, 91.21, 0.82; GCF_00039966…	83.98
NJASGE2bin.1	NJ_NJASGE2	cultivable	99.5	0.087	19.3362	0.986996	d__Bacteria;p__Proteobacteria;c__Gammaproteobacteria;o__Burkholderiales;f__Burkholderiaceae;g__Pandoraea;s__	N/A	N/A	N/A	N/A	N/A	N/A	N/A	N/A	N/A	N/A	d__Bacteria;p__Proteobacteria;c__Gammaproteobacteria;o__Burkholderiales;f__Burkholderiaceae;g__Pandoraea;s__	taxonomic classification defined by topology and ANI	N/A	GCF_902459725.1, s__Pandoraea eparura, 95.0, 86.97, 0.8; GCF_902459665.1, s__Pandoraea cepalis, 95.0, 86.91, 0.79; GCF_902459705.1, s__Pandoraea terrigena, 95.0, 86.82, 0.79; GCF_902459805.1, s__Pandoraea bronchicola, 95.0, 86.64, 0.76; GCF_902459745.1, s__Pandoraea communis, 95.0166, 86.3, 0.78; GCF_902459555.1, s__Pandoraea horticolens, 95.0166, 86.01, 0.79; GCF_000807775.2, s__Pandoraea fibros…	98.47
NJASGE2bin.10	NJ_NJASGE2	cultivable	73.44	6.034	13.0351	0.975396	d__Bacteria;p__Proteobacteria;c__Gammaproteobacteria;o__Burkholderiales;f__Rhodocyclaceae;g__Azonexus;s__	N/A	N/A	N/A	N/A	N/A	GCA_903922075.1	95	d__Bacteria;p__Proteobacteria;c__Gammaproteobacteria;o__Burkholderiales;f__Rhodocyclaceae;g__Azonexus;s__Azonexus sp903922075	89.81	0.78	d__Bacteria;p__Proteobacteria;c__Gammaproteobacteria;o__Burkholderiales;f__Rhodocyclaceae;g__Azonexus;s__	taxonomic classification defined by topology and ANI	N/A	GCF_009469585.1, s__Azonexus sp009469585, 95.0, 84.45, 0.64; GCA_002840785.1, s__Azonexus sp002840785, 95.0, 83.4, 0.6; GCA_013335535.1, s__Azonexus sp013335535, 95.0, 83.34, 0.65; GCF_009469615.1, s__Azonexus sp009469615, 95.0, 83.32, 0.59; GCF_000519045.1, s__Azonexus agitatus, 95.0, 83.3, 0.58; GCF_001551835.1, s__Azonexus denitrificans, 95.0, 83.27, 0.63; GCA_008080565.1, s__Azonexus sp008080…	63.23
NJASGE2bin.11	NJ_NJASGE2	cultivable	62.93	5.172	17.6282	N/A	d__Bacteria;p__Proteobacteria;c__Gammaproteobacteria;o__Enterobacterales;f__Aeromonadaceae;g__Aeromonas;s__Aeromonas hydrophila	GCF_000014805.1	95	d__Bacteria;p__Proteobacteria;c__Gammaproteobacteria;o__Enterobacterales;f__Aeromonadaceae;g__Aeromonas;s__Aeromonas hydrophila	97.12	0.94	GCF_000014805.1	95	d__Bacteria;p__Proteobacteria;c__Gammaproteobacteria;o__Enterobacterales;f__Aeromonadaceae;g__Aeromonas;s__Aeromonas hydrophila	97.12	0.94	d__Bacteria;p__Proteobacteria;c__Gammaproteobacteria;o__Enterobacterales;f__Aeromonadaceae;g__Aeromonas;s__	taxonomic classification defined by topology and ANI	topological placement and ANI have congruent species assignments	GCF_000820305.1, s__Aeromonas dhakensis, 95.0, 93.85, 0.9; GCF_000819745.1, s__Aeromonas bestiarum, 95.5033, 90.22, 0.9; GCF_000820005.1, s__Aeromonas piscicola, 95.5033, 89.59, 0.88; GCF_000820085.1, s__Aeromonas sanarellii, 95.0, 88.91, 0.77; GCF_000819785.1, s__Aeromonas caviae, 95.0, 88.65, 0.78; GCF_000820165.1, s__Aeromonas taiwanensis, 95.0, 88.49, 0.77; GCF_000820025.1, s__Aeromonas popof…	53.68
NJASGE2bin.12	NJ_NJASGE2	cultivable	77.33	4.745	19.7702	N/A	d__Bacteria;p__Actinobacteriota;c__Actinomycetia;o__Propionibacteriales;f__Propionibacteriaceae;g__Micropruina;s__Micropruina glycogenica	GCF_900289045.1	95	d__Bacteria;p__Actinobacteriota;c__Actinomycetia;o__Propionibacteriales;f__Propionibacteriaceae;g__Micropruina;s__Micropruina glycogenica	98.09	0.94	GCF_900289045.1	95	d__Bacteria;p__Actinobacteriota;c__Actinomycetia;o__Propionibacteriales;f__Propionibacteriaceae;g__Micropruina;s__Micropruina glycogenica	98.09	0.94	d__Bacteria;p__Actinobacteriota;c__Actinomycetia;o__Propionibacteriales;f__Propionibacteriaceae;g__Micropruina;s__	taxonomic classification defined by topology and ANI	topological placement and ANI have congruent species assignments	GCA_013693855.1, s__Micropruina sp013693855, 95.0, 79.25, 0.47	69.8
NJASGE2bin.13	NJ_NJASGE2	cultivable	51.52	5.485	6.88801	0.991339	d__Bacteria;p__Proteobacteria;c__Gammaproteobacteria;o__Burkholderiales;f__Burkholderiaceae;g__Pelomonas;s__	N/A	N/A	N/A	N/A	N/A	GCA_003963075.1	95	d__Bacteria;p__Proteobacteria;c__Gammaproteobacteria;o__Burkholderiales;f__Burkholderiaceae;g__Pelomonas;s__Pelomonas sp003963075	85.13	0.87	d__Bacteria;p__Proteobacteria;c__Gammaproteobacteria;o__Burkholderiales;f__Burkholderiaceae;g__Pelomonas;s__	taxonomic classification defined by topology and ANI	N/A	GCA_009996515.1, s__Pelomonas sp009996515, 95.0, 87.32, 0.9; GCF_004342485.1, s__Pelomonas saccharophila, 95.0, 87.2, 0.95; GCF_001426885.1, s__Pelomonas sp001426885, 95.0, 86.15, 0.89; GCF_003550215.1, s__Pelomonas sp003550215, 95.0, 86.03, 0.91; GCF_001425055.1, s__Pelomonas sp001425055, 95.0, 85.63, 0.91; GCF_001425705.1, s__Pelomonas sp001425705, 95.0, 85.41, 0.91; GCF_001425165.1, s__Pelomon…	29.4
NJASGE2bin.14	NJ_NJASGE2	cultivable	99.24	0.576	15.9039	0.987478	d__Bacteria;p__Proteobacteria;c__Alphaproteobacteria;o__Sphingomonadales;f__Sphingomonadaceae;g__Sphingorhabdus_B;s__	N/A	N/A	N/A	N/A	N/A	GCF_003367235.1	95	d__Bacteria;p__Proteobacteria;c__Alphaproteobacteria;o__Sphingomonadales;f__Sphingomonadaceae;g__Sphingorhabdus_B;s__Sphingorhabdus_B sp003367235	82.26	0.62	d__Bacteria;p__Proteobacteria;c__Alphaproteobacteria;o__Sphingomonadales;f__Sphingomonadaceae;g__Sphingorhabdus_B;s__	taxonomic classification defined by topology and ANI	N/A	GCF_009768975.1, s__Sphingorhabdus_B lacus, 95.0, 78.86, 0.28; GCF_007280415.1, s__Sphingorhabdus_B contaminans, 95.0, 77.86, 0.24; GCF_009769755.1, s__Sphingorhabdus_B profundilacus, 95.0, 77.85, 0.24; GCA_013823985.1, s__Sphingorhabdus_B sp013823985, 95.0, 77.7, 0.27; GCA_002479765.1, s__Sphingorhabdus_B sp002479765, 95.0, 77.66, 0.27; GCF_014196595.1, s__Sphingorhabdus_B rigui, 95.0, 77.65, 0.…	98.23
NJASGE2bin.15	NJ_NJASGE2	cultivable	97.34	2.544	27.3945	0.977126	d__Bacteria;p__Proteobacteria;c__Alphaproteobacteria;o__Rhodobacterales;f__Rhodobacteraceae;g__Albidovulum;s__	N/A	N/A	N/A	N/A	N/A	GCA_008933605.1	95	d__Bacteria;p__Proteobacteria;c__Alphaproteobacteria;o__Rhodobacterales;f__Rhodobacteraceae;g__Albidovulum;s__Albidovulum sp008933605	89.3	0.77	d__Bacteria;p__Proteobacteria;c__Alphaproteobacteria;o__Rhodobacterales;f__Rhodobacteraceae;g__Albidovulum;s__	taxonomic classification defined by topology and ANI	N/A	GCA_011620265.1, s__Albidovulum sp011620265, 95.0, 82.52, 0.69; GCA_002280515.1, s__Albidovulum sp002280515, 95.0, 82.17, 0.7; GCA_002841115.1, s__Albidovulum sp002841115, 95.0, 80.75, 0.55; GCF_002973535.1, s__Albidovulum denitrificans, 95.0, 80.6, 0.59; GCA_002440625.1, s__Albidovulum sp002440625, 95.0, 80.27, 0.47; GCF_900302475.1, s__Albidovulum aquaemixtae, 95.0, 80.02, 0.57; GCF_002927635.1…	95.35
NJASGE2bin.16	NJ_NJASGE2	cultivable	90.52	0.473	31.4111	N/A	d__Bacteria;p__Proteobacteria;c__Gammaproteobacteria;o__Burkholderiales;f__Rhodocyclaceae;g__Azonexus;s__Azonexus hortensis	GCF_009469765.1	95	d__Bacteria;p__Proteobacteria;c__Gammaproteobacteria;o__Burkholderiales;f__Rhodocyclaceae;g__Azonexus;s__Azonexus hortensis	97.53	0.87	GCF_009469765.1	95	d__Bacteria;p__Proteobacteria;c__Gammaproteobacteria;o__Burkholderiales;f__Rhodocyclaceae;g__Azonexus;s__Azonexus hortensis	97.53	0.87	d__Bacteria;p__Proteobacteria;c__Gammaproteobacteria;o__Burkholderiales;f__Rhodocyclaceae;g__Azonexus;s__	taxonomic classification defined by topology and ANI	topological placement and ANI have congruent species assignments	GCF_001551835.1, s__Azonexus denitrificans, 95.0, 94.51, 0.85; GCF_012275485.1, s__Azonexus sp012275485, 95.0, 83.58, 0.63; GCF_009469615.1, s__Azonexus sp009469615, 95.0, 83.45, 0.58; GCA_002440665.1, s__Azonexus sp002440665, 95.0, 83.43, 0.58; GCF_009469585.1, s__Azonexus sp009469585, 95.0, 83.3, 0.58; GCA_003583745.1, s__Azonexus sp003583745, 95.0, 83.22, 0.58; GCA_903922075.1, s__Azonexus sp9…	85.57
NJASGE2bin.17	NJ_NJASGE2	cultivable	99.37	0.414	20.3717	0.987865	d__Bacteria;p__Proteobacteria;c__Gammaproteobacteria;o__Burkholderiales;f__Burkholderiaceae;g__Hylemonella;s__	N/A	N/A	N/A	N/A	N/A	GCA_003500955.1	95	d__Bacteria;p__Proteobacteria;c__Gammaproteobacteria;o__Burkholderiales;f__Burkholderiaceae;g__Hylemonella;s__Hylemonella sp003500955	90.91	0.83	d__Bacteria;p__Proteobacteria;c__Gammaproteobacteria;o__Burkholderiales;f__Burkholderiaceae;g__Hylemonella;s__	taxonomic classification defined by topology and ANI	N/A	GCF_013334205.1, s__Hylemonella sp013334205, 95.0, 86.16, 0.8; GCF_001432305.1, s__Hylemonella sp001432305, 95.0, 85.64, 0.8; GCA_001797315.1, s__Hylemonella sp001797315, 95.0, 83.07, 0.66; GCF_001592265.1, s__Hylemonella delicata, 95.0, 82.76, 0.63; GCA_002633085.1, s__Hylemonella sp002633085, 95.0, 82.2, 0.62; GCF_004328645.1, s__Hylemonella gracilis_B, 95.0, 81.63, 0.57; GCF_000600295.1, s__Hy…	98.29
NJASGE2bin.18	NJ_NJASGE2	cultivable	67.96	5.672	11.2597	0.90424	d__Bacteria;p__Proteobacteria;c__Alphaproteobacteria;o__Sphingomonadales;f__Sphingomonadaceae;g__;s__	N/A	N/A	N/A	N/A	N/A	N/A	N/A	N/A	N/A	N/A	d__Bacteria;p__Proteobacteria;c__Alphaproteobacteria;o__Sphingomonadales;f__Sphingomonadaceae;g__;s__	taxonomic novelty determined using RED	N/A	N/A	58.37
NJASGE2bin.19	NJ_NJASGE2	cultivable	52.35	7.915	38.8854	0.939636	d__Bacteria;p__Proteobacteria;c__Gammaproteobacteria;o__Burkholderiales;f__Burkholderiaceae;g__Aquabacterium;s__	N/A	N/A	N/A	N/A	N/A	GCA_004322345.1	95	d__Bacteria;p__Proteobacteria;c__Gammaproteobacteria;o__Burkholderiales;f__Burkholderiaceae;g__Aquabacterium;s__Aquabacterium sp004322345	79.84	0.4	d__Bacteria;p__Proteobacteria;c__Gammaproteobacteria;o__Burkholderiales;f__Burkholderiaceae;g__Aquabacterium;s__	taxonomic classification defined by topology and ANI	N/A	GCA_001770725.1, s__Aquabacterium sp001770725, 95.0, 80.39, 0.38; GCF_003100395.1, s__Aquabacterium olei, 95.0, 80.34, 0.36; GCF_001447195.1, s__Aquabacterium parvum, 95.0, 80.32, 0.37; GCF_004362855.1, s__Aquabacterium commune, 95.0, 80.3, 0.38; GCF_005502875.1, s__Aquabacterium sp005502875, 95.0, 80.29, 0.37; GCA_903894125.1, s__Aquabacterium sp903894125, 95.0, 80.15, 0.28; GCF_004310865.1, s__…	32.4
NJASGE2bin.2	NJ_NJASGE2	cultivable	96.7	1.9	59.8831	0.937259	d__Bacteria;p__Proteobacteria;c__Gammaproteobacteria;o__Burkholderiales;f__Burkholderiaceae;g__Ramlibacter;s__	N/A	N/A	N/A	N/A	N/A	N/A	N/A	N/A	N/A	N/A	d__Bacteria;p__Proteobacteria;c__Gammaproteobacteria;o__Burkholderiales;f__Burkholderiaceae;g__;s__	taxonomic novelty determined using RED	N/A	N/A	87.97
NJASGE2bin.20	NJ_NJASGE2	cultivable	50.39	4.482	11.1259	0.982641	d__Bacteria;p__Proteobacteria;c__Gammaproteobacteria;o__Burkholderiales;f__Burkholderiaceae;g__Giesbergeria;s__	N/A	N/A	N/A	N/A	N/A	GCA_001770955.1	95	d__Bacteria;p__Proteobacteria;c__Gammaproteobacteria;o__Burkholderiales;f__Burkholderiaceae;g__Giesbergeria;s__Giesbergeria sp001770955	85.21	0.58	d__Bacteria;p__Proteobacteria;c__Gammaproteobacteria;o__Burkholderiales;f__Burkholderiaceae;g__Giesbergeria;s__	taxonomic classification defined by topology and ANI	N/A	GCF_003604195.1, s__Giesbergeria lacusdiani, 95.0, 83.98, 0.61; GCF_010020825.1, s__Giesbergeria sp010020825, 95.0, 83.39, 0.62; GCF_000739995.1, s__Giesbergeria granuli, 95.0, 82.46, 0.57; GCF_003096555.1, s__Giesbergeria sp003096555, 95.0, 82.18, 0.55; GCF_012932145.1, s__Giesbergeria sp012932145, 95.0, 81.07, 0.47; GCF_004341365.1, s__Giesbergeria metamorpha, 95.0, 80.75, 0.41; GCA_001724785.1…	31.94
NJASGE2bin.21	NJ_NJASGE2	cultivable	50.57	3.35	8.92936	N/A	d__Bacteria;p__Proteobacteria;c__Gammaproteobacteria;o__Burkholderiales;f__Rhodocyclaceae;g__Thauera;s__Thauera aminoaromatica	GCF_000310185.1	95	d__Bacteria;p__Proteobacteria;c__Gammaproteobacteria;o__Burkholderiales;f__Rhodocyclaceae;g__Thauera;s__Thauera aminoaromatica	98.04	0.9	GCF_000310185.1	95	d__Bacteria;p__Proteobacteria;c__Gammaproteobacteria;o__Burkholderiales;f__Rhodocyclaceae;g__Thauera;s__Thauera aminoaromatica	98.04	0.9	d__Bacteria;p__Proteobacteria;c__Gammaproteobacteria;o__Burkholderiales;f__Rhodocyclaceae;g__Thauera;s__	taxonomic classification defined by topology and ANI	topological placement and ANI have congruent species assignments	GCF_000310225.1, s__Thauera phenylacetica, 95.0, 91.43, 0.82; GCA_003963015.1, s__Thauera sp003963015, 95.0, 91.36, 0.83; GCA_002422685.1, s__Thauera sp002422685, 95.0, 85.59, 0.73; GCA_003446655.1, s__Thauera sp003446655, 95.0, 84.55, 0.63; GCF_001922305.1, s__Thauera chlorobenzoica, 95.0, 83.81, 0.67; GCF_001051995.2, s__Thauera humireducens, 95.0, 83.79, 0.68; GCF_003030465.1, s__Thauera aroma…	32.12
NJASGE2bin.22	NJ_NJASGE2	cultivable	99.08	2.697	29.7987	N/A	d__Bacteria;p__Proteobacteria;c__Gammaproteobacteria;o__Burkholderiales;f__Rhodocyclaceae;g__Niveibacterium;s__Niveibacterium sp013184235	GCF_013184235.1	95	d__Bacteria;p__Proteobacteria;c__Gammaproteobacteria;o__Burkholderiales;f__Rhodocyclaceae;g__Niveibacterium;s__Niveibacterium sp013184235	97.82	0.92	GCF_013184235.1	95	d__Bacteria;p__Proteobacteria;c__Gammaproteobacteria;o__Burkholderiales;f__Rhodocyclaceae;g__Niveibacterium;s__Niveibacterium sp013184235	97.82	0.92	d__Bacteria;p__Proteobacteria;c__Gammaproteobacteria;o__Burkholderiales;f__Rhodocyclaceae;g__Niveibacterium;s__	taxonomic classification defined by topology and ANI	topological placement and ANI have congruent species assignments	GCF_014197015.1, s__Niveibacterium umoris, 95.0, 84.73, 0.66; GCA_009781175.1, s__Niveibacterium sp009781175, 95.0, 78.28, 0.27	93.35
NJASGE2bin.23	NJ_NJASGE2	cultivable	89.53	1.508	11.4629	0.985161	d__Bacteria;p__Proteobacteria;c__Alphaproteobacteria;o__Sphingomonadales;f__Sphingomonadaceae;g__Rhizorhabdus;s__	N/A	N/A	N/A	N/A	N/A	GCF_011044255.1	95	d__Bacteria;p__Proteobacteria;c__Alphaproteobacteria;o__Sphingomonadales;f__Sphingomonadaceae;g__Rhizorhabdus;s__Rhizorhabdus sp011044255	87.27	0.82	d__Bacteria;p__Proteobacteria;c__Alphaproteobacteria;o__Sphingomonadales;f__Sphingomonadaceae;g__Rhizorhabdus;s__	taxonomic classification defined by topology and ANI	N/A	GCF_000016765.1, s__Rhizorhabdus wittichii, 95.0, 83.11, 0.61; GCF_002355275.1, s__Rhizorhabdus dicambivorans, 95.0, 83.1, 0.56; GCF_900167915.1, s__Rhizorhabdus histidinilytica, 95.0, 82.99, 0.58; GCF_001015195.1, s__Rhizorhabdus sp001015195, 95.0, 82.73, 0.55; GCF_001428605.1, s__Rhizorhabdus sp001428605, 95.0, 82.65, 0.59; GCF_001429065.1, s__Rhizorhabdus sp001429065, 95.0, 82.13, 0.54; GCF_00…	81.58
NJASGE2bin.24	NJ_NJASGE2	cultivable	59.48	5.172	16.4241	0.976453	d__Bacteria;p__Proteobacteria;c__Gammaproteobacteria;o__Burkholderiales;f__Rhodocyclaceae;g__Azonexus;s__	N/A	N/A	N/A	N/A	N/A	GCF_000519045.1	95	d__Bacteria;p__Proteobacteria;c__Gammaproteobacteria;o__Burkholderiales;f__Rhodocyclaceae;g__Azonexus;s__Azonexus agitatus	86.75	0.79	d__Bacteria;p__Proteobacteria;c__Gammaproteobacteria;o__Burkholderiales;f__Rhodocyclaceae;g__Azonexus;s__	taxonomic classification defined by topology and ANI	N/A	GCF_008711155.1, s__Azonexus sp008711155, 95.0, 84.15, 0.7; GCF_009469585.1, s__Azonexus sp009469585, 95.0, 83.44, 0.66; GCA_903922075.1, s__Azonexus sp903922075, 95.0, 83.08, 0.54; GCF_009469615.1, s__Azonexus sp009469615, 95.0, 82.97, 0.62; GCF_001551835.1, s__Azonexus denitrificans, 95.0, 82.65, 0.68; GCF_009469765.1, s__Azonexus hortensis, 95.0, 82.6, 0.68; GCA_013335535.1, s__Azonexus sp0133…	47.65
NJASGE2bin.25	NJ_NJASGE2	cultivable	77.73	1.709	9.01579	0.985586	d__Bacteria;p__Proteobacteria;c__Gammaproteobacteria;o__Enterobacterales;f__Alteromonadaceae;g__Pararheinheimera;s__	N/A	N/A	N/A	N/A	N/A	GCA_003543135.1	95	d__Bacteria;p__Proteobacteria;c__Gammaproteobacteria;o__Enterobacterales;f__Alteromonadaceae;g__Pararheinheimera;s__Pararheinheimera sp003543135	85.13	0.77	d__Bacteria;p__Proteobacteria;c__Gammaproteobacteria;o__Enterobacterales;f__Alteromonadaceae;g__Pararheinheimera;s__	taxonomic classification defined by topology and ANI	N/A	GCF_004005945.1, s__Pararheinheimera riviphila, 95.0, 80.45, 0.55; GCF_001669775.1, s__Pararheinheimera sp001669775, 95.0, 80.41, 0.55; GCA_008015325.1, s__Pararheinheimera sp008015325, 95.0, 78.65, 0.35; GCF_000711985.1, s__Pararheinheimera texasensis, 95.0, 78.6, 0.4; GCF_003990335.1, s__Pararheinheimera sp003990335, 95.0, 78.5, 0.3; GCF_004005375.1, s__Pararheinheimera sp004005375, 95.0, 78.41…	61.21
NJASGE2bin.26	NJ_NJASGE2	cultivable	94.72	1.161	28.5889	0.975013	d__Bacteria;p__Proteobacteria;c__Alphaproteobacteria;o__Rhodobacterales;f__Rhodobacteraceae;g__Tabrizicola;s__	N/A	N/A	N/A	N/A	N/A	GCF_002900975.1	95	d__Bacteria;p__Proteobacteria;c__Alphaproteobacteria;o__Rhodobacterales;f__Rhodobacteraceae;g__Tabrizicola;s__Tabrizicola aquatica	85.37	0.75	d__Bacteria;p__Proteobacteria;c__Alphaproteobacteria;o__Rhodobacterales;f__Rhodobacteraceae;g__Tabrizicola;s__	taxonomic classification defined by topology and ANI	N/A	GCF_008271465.1, s__Tabrizicola flagellatus, 95.0, 84.38, 0.66; GCF_011174775.1, s__Tabrizicola sp011174775, 95.0, 84.15, 0.65; GCF_003574395.1, s__Tabrizicola thermarum, 95.0, 84.01, 0.66; GCA_013824055.1, s__Tabrizicola sp013824055, 95.0, 83.68, 0.7; GCF_005222785.1, s__Tabrizicola sp005222785, 95.0, 83.4, 0.68; GCA_002280405.1, s__Tabrizicola sp002280405, 95.0, 82.86, 0.67; GCF_004762095.1, s_…	83.18
NJASGE2bin.27	NJ_NJASGE2	cultivable	93	3.821	9.92667	N/A	d__Bacteria;p__Proteobacteria;c__Gammaproteobacteria;o__Pseudomonadales;f__Moraxellaceae;g__Acinetobacter;s__Acinetobacter wuhouensis	GCF_001696605.3	95	d__Bacteria;p__Proteobacteria;c__Gammaproteobacteria;o__Pseudomonadales;f__Moraxellaceae;g__Acinetobacter;s__Acinetobacter wuhouensis	96.77	0.85	GCF_001696605.3	95	d__Bacteria;p__Proteobacteria;c__Gammaproteobacteria;o__Pseudomonadales;f__Moraxellaceae;g__Acinetobacter;s__Acinetobacter wuhouensis	96.77	0.85	d__Bacteria;p__Proteobacteria;c__Gammaproteobacteria;o__Pseudomonadales;f__Moraxellaceae;g__Acinetobacter;s__	taxonomic classification defined by topology and ANI	topological placement and ANI have congruent species assignments	GCF_003268395.1, s__Acinetobacter sp003268395, 95.0, 84.97, 0.6; GCF_002165375.2, s__Acinetobacter chinensis, 95.0, 82.78, 0.42; GCF_000368145.1, s__Acinetobacter guillouiae, 95.0, 82.08, 0.66; GCF_002233755.1, s__Acinetobacter piscicola, 95.0, 81.93, 0.57; GCF_000214135.1, s__Acinetobacter sp000214135, 95.0, 81.8, 0.6; GCF_003611475.1, s__Acinetobacter sp003611475, 95.0, 81.77, 0.6; GCF_00302451…	72.27
NJASGE2bin.28	NJ_NJASGE2	cultivable	84.1	1.246	56.9959	0.970828	d__Bacteria;p__Proteobacteria;c__Gammaproteobacteria;o__Burkholderiales;f__Burkholderiaceae;g__Rhodoferax;s__	N/A	N/A	N/A	N/A	N/A	GCA_008015235.1	95	d__Bacteria;p__Proteobacteria;c__Gammaproteobacteria;o__Burkholderiales;f__Burkholderiaceae;g__Rhodoferax;s__Rhodoferax sp008015235	80.34	0.39	d__Bacteria;p__Proteobacteria;c__Gammaproteobacteria;o__Burkholderiales;f__Burkholderiaceae;g__Rhodoferax;s__	taxonomic classification defined by topology and ANI	N/A	GCA_001795455.1, s__Rhodoferax sp001795455, 95.0, 79.35, 0.38; GCF_002943465.1, s__Rhodoferax sp002943465, 95.0, 79.28, 0.39; GCF_005876985.1, s__Rhodoferax bucti, 95.0, 79.25, 0.34; GCF_002251855.1, s__Rhodoferax sp002251855, 95.0, 79.08, 0.36; GCF_003415675.1, s__Rhodoferax sp003415675, 95.0, 79.07, 0.33; GCA_001770935.1, s__Rhodoferax sp001770935, 95.0, 79.05, 0.37; GCF_001955715.1, s__Rhodofe…	82.57
NJASGE2bin.3	NJ_NJASGE2	cultivable	70.62	5.819	18.2387	0.975322	d__Bacteria;p__Proteobacteria;c__Alphaproteobacteria;o__Rhodobacterales;f__Rhodobacteraceae;g__Tabrizicola;s__	N/A	N/A	N/A	N/A	N/A	N/A	N/A	N/A	N/A	N/A	d__Bacteria;p__Proteobacteria;c__Alphaproteobacteria;o__Rhodobacterales;f__Rhodobacteraceae;g__Tabrizicola;s__	taxonomic classification defined by topology and ANI	N/A	GCF_008271465.1, s__Tabrizicola flagellatus, 95.0, 84.05, 0.75; GCF_003574395.1, s__Tabrizicola thermarum, 95.0, 83.94, 0.76; GCF_005222785.1, s__Tabrizicola sp005222785, 95.0, 83.86, 0.79; GCF_011174775.1, s__Tabrizicola sp011174775, 95.0, 83.66, 0.75; GCA_013824055.1, s__Tabrizicola sp013824055, 95.0, 83.53, 0.61; GCA_009773055.1, s__Tabrizicola sp009773055, 95.0, 83.07, 0.42; GCA_002280405.1, …	52.21
NJASGE2bin.31	NJ_NJASGE2	cultivable	99.06	0.147	23.9253	0.947232	d__Bacteria;p__Proteobacteria;c__Gammaproteobacteria;o__Burkholderiales;f__Burkholderiaceae;g__Ideonella;s__	N/A	N/A	N/A	N/A	N/A	N/A	N/A	N/A	N/A	N/A	d__Bacteria;p__Proteobacteria;c__Gammaproteobacteria;o__Burkholderiales;f__Burkholderiaceae;g__;s__	taxonomic novelty determined using RED	N/A	N/A	99.32
NJASGE2bin.32	NJ_NJASGE2	cultivable	97.53	1.59	37.9765	N/A	d__Bacteria;p__Proteobacteria;c__Gammaproteobacteria;o__Burkholderiales;f__Burkholderiaceae;g__Acidovorax;s__Acidovorax temperans	GCF_006716905.1	95	d__Bacteria;p__Proteobacteria;c__Gammaproteobacteria;o__Burkholderiales;f__Burkholderiaceae;g__Acidovorax;s__Acidovorax temperans	95.49	0.87	GCF_006716905.1	95	d__Bacteria;p__Proteobacteria;c__Gammaproteobacteria;o__Burkholderiales;f__Burkholderiaceae;g__Acidovorax;s__Acidovorax temperans	95.49	0.87	d__Bacteria;p__Proteobacteria;c__Gammaproteobacteria;o__Burkholderiales;f__Burkholderiaceae;g__Acidovorax;s__	taxonomic classification defined by topology and ANI	topological placement and ANI have congruent species assignments	GCA_002377855.1, s__Acidovorax delafieldii_A, 95.0, 86.66, 0.75; GCF_003669015.1, s__Acidovorax sp002754495, 95.0, 86.52, 0.8; GCF_003663825.1, s__Acidovorax sp003663825, 95.0, 86.14, 0.8; GCF_000302535.1, s__Acidovorax sp000302535, 95.0, 84.67, 0.72; GCF_001633105.1, s__Acidovorax sp001633105, 95.0, 84.33, 0.73; GCF_003058055.1, s__Acidovorax sp003058055, 95.0, 84.29, 0.73; GCF_005405905.1, s__A…	95.87
NJASGE2bin.33	NJ_NJASGE2	cultivable	99.47	0.341	21.1851	N/A	d__Bacteria;p__Proteobacteria;c__Alphaproteobacteria;o__Sphingomonadales;f__Sphingomonadaceae;g__Erythrobacter;s__Erythrobacter neustonensis	GCF_001663175.1	95	d__Bacteria;p__Proteobacteria;c__Alphaproteobacteria;o__Sphingomonadales;f__Sphingomonadaceae;g__Erythrobacter;s__Erythrobacter neustonensis	97.71	0.95	GCF_001663175.1	95	d__Bacteria;p__Proteobacteria;c__Alphaproteobacteria;o__Sphingomonadales;f__Sphingomonadaceae;g__Erythrobacter;s__Erythrobacter neustonensis	97.71	0.95	d__Bacteria;p__Proteobacteria;c__Alphaproteobacteria;o__Sphingomonadales;f__Sphingomonadaceae;g__Erythrobacter;s__	taxonomic classification defined by topology and ANI	topological placement and ANI have congruent species assignments	GCF_002155685.1, s__Erythrobacter colymbi, 95.0, 84.72, 0.8; GCF_006542605.1, s__Erythrobacter sp006542605, 95.0, 84.43, 0.77; GCF_002155425.1, s__Erythrobacter donghaensis, 95.0, 84.35, 0.79; GCF_000331285.1, s__Erythrobacter sp000331285, 95.0, 84.19, 0.78; GCA_013822695.1, s__Erythrobacter sp013822695, 95.0, 84.13, 0.74; GCF_001557325.1, s__Erythrobacter donghaensis_B, 95.0, 84.1, 0.7; GCF_0015…	98.05
NJASGE2bin.34	NJ_NJASGE2	cultivable	87.9	2.102	39.9341	0.979876	d__Bacteria;p__Proteobacteria;c__Gammaproteobacteria;o__Burkholderiales;f__Burkholderiaceae;g__Inhella;s__	N/A	N/A	N/A	N/A	N/A	GCF_005952805.1	95	d__Bacteria;p__Proteobacteria;c__Gammaproteobacteria;o__Burkholderiales;f__Burkholderiaceae;g__Inhella;s__Inhella inkyongensis	80.59	0.52	d__Bacteria;p__Proteobacteria;c__Gammaproteobacteria;o__Burkholderiales;f__Burkholderiaceae;g__Inhella;s__	taxonomic classification defined by topology and ANI	N/A	GCF_004004565.1, s__Inhella crocodyli, 95.0, 81.18, 0.55	82.97
NJASGE2bin.35	NJ_NJASGE2	cultivable	89.36	3.38	9.78778	0.989423	d__Bacteria;p__Bacteroidota;c__Bacteroidia;o__Flavobacteriales;f__Flavobacteriaceae;g__Flavobacterium;s__	N/A	N/A	N/A	N/A	N/A	N/A	N/A	N/A	N/A	N/A	d__Bacteria;p__Bacteroidota;c__Bacteroidia;o__Flavobacteriales;f__Flavobacteriaceae;g__Flavobacterium;s__	taxonomic classification defined by topology and ANI	N/A	GCF_000686885.1, s__Flavobacterium sasangense, 95.0, 88.81, 0.69; GCA_002422095.1, s__Flavobacterium sp002422095, 95.0, 88.8, 0.61; GCF_003259835.1, s__Flavobacterium aquaticum, 95.0, 88.47, 0.69; GCA_002421645.1, s__Flavobacterium sp002421645, 95.0, 87.97, 0.6; GCA_003963025.1, s__Flavobacterium sp003963025, 95.0, 87.39, 0.59; GCF_004363695.1, s__Flavobacterium cheniae, 95.0, 86.34, 0.66; GCA_00…	84.83
NJASGE2bin.36	NJ_NJASGE2	cultivable	93.91	0.881	13.1419	N/A	d__Bacteria;p__Proteobacteria;c__Alphaproteobacteria;o__Sphingomonadales;f__Sphingomonadaceae;g__Sphingopyxis;s__Sphingopyxis terrae	GCF_001598815.1	95	d__Bacteria;p__Proteobacteria;c__Alphaproteobacteria;o__Sphingomonadales;f__Sphingomonadaceae;g__Sphingopyxis;s__Sphingopyxis terrae	95.84	0.91	GCF_001598815.1	95	d__Bacteria;p__Proteobacteria;c__Alphaproteobacteria;o__Sphingomonadales;f__Sphingomonadaceae;g__Sphingopyxis;s__Sphingopyxis terrae	95.84	0.91	d__Bacteria;p__Proteobacteria;c__Alphaproteobacteria;o__Sphingomonadales;f__Sphingomonadaceae;g__Sphingopyxis;s__	taxonomic classification defined by topology and ANI	topological placement and ANI have congruent species assignments	GCF_002993885.1, s__Sphingopyxis lindanitolerans, 95.0, 84.39, 0.76; GCF_001468395.1, s__Sphingopyxis sp001468395, 95.0, 84.19, 0.76; GCF_002277025.1, s__Sphingopyxis sp002277025, 95.0, 84.14, 0.79; GCF_900188185.1, s__Sphingopyxis indica, 95.0, 84.12, 0.76; GCA_900078365.1, s__Sphingopyxis sp900078365, 95.0, 84.1, 0.78; GCA_013821905.1, s__Sphingopyxis sp013821905, 95.0, 84.05, 0.64; GCF_0014682…	87.39
NJASGE2bin.38	NJ_NJASGE2	cultivable	82.7	8.736	11.5857	N/A	d__Bacteria;p__Bacteroidota;c__Bacteroidia;o__Bacteroidales;f__Tannerellaceae;g__Macellibacteroides;s__Macellibacteroides fermentans	GCF_013409575.1	95	d__Bacteria;p__Bacteroidota;c__Bacteroidia;o__Bacteroidales;f__Tannerellaceae;g__Macellibacteroides;s__Macellibacteroides fermentans	97.32	0.77	GCF_013409575.1	95	d__Bacteria;p__Bacteroidota;c__Bacteroidia;o__Bacteroidales;f__Tannerellaceae;g__Macellibacteroides;s__Macellibacteroides fermentans	97.32	0.77	d__Bacteria;p__Bacteroidota;c__Bacteroidia;o__Bacteroidales;f__Tannerellaceae;g__;s__	taxonomic classification defined by topology and ANI	topological placement and ANI have congruent species assignments	N/A	73.73
NJASGE2bin.4	NJ_NJASGE2	cultivable	93.24	0.014	29.4492	0.93929	d__Bacteria;p__Proteobacteria;c__Alphaproteobacteria;o__Dongiales;f__Dongiaceae;g__Dongia;s__	N/A	N/A	N/A	N/A	N/A	GCF_004363235.1	95	d__Bacteria;p__Proteobacteria;c__Alphaproteobacteria;o__Dongiales;f__Dongiaceae;g__Dongia;s__Dongia mobilis	81.04	0.58	d__Bacteria;p__Proteobacteria;c__Alphaproteobacteria;o__Dongiales;f__Dongiaceae;g__Dongia;s__	taxonomic classification defined by topology and ANI	N/A	GCF_000620685.1, s__Dongia sp000620685, 95.0, 77.99, 0.32	80.72
NJASGE2bin.5	NJ_NJASGE2	cultivable	58.73	2.052	6.06149	0.898543	d__Bacteria;p__Proteobacteria;c__Gammaproteobacteria;o__Burkholderiales;f__Burkholderiaceae;g__;s__	N/A	N/A	N/A	N/A	N/A	N/A	N/A	N/A	N/A	N/A	d__Bacteria;p__Proteobacteria;c__Gammaproteobacteria;o__Burkholderiales;f__Burkholderiaceae;g__;s__	taxonomic classification fully defined by topology	N/A	N/A	40.46
NJASGE2bin.6	NJ_NJASGE2	cultivable	96.69	0.344	25.878	0.96505	d__Bacteria;p__Proteobacteria;c__Gammaproteobacteria;o__Xanthomonadales;f__Xanthomonadaceae;g__Luteimonas;s__	N/A	N/A	N/A	N/A	N/A	GCA_001683895.1	95	d__Bacteria;p__Proteobacteria;c__Gammaproteobacteria;o__Xanthomonadales;f__Xanthomonadaceae;g__Luteimonas;s__Luteimonas sp001683895	82.65	0.65	d__Bacteria;p__Proteobacteria;c__Gammaproteobacteria;o__Xanthomonadales;f__Xanthomonadaceae;g__Luteimonas;s__	taxonomic classification defined by topology and ANI	N/A	GCA_014652935.1, s__Luteimonas padinae, 95.0, 82.99, 0.63; GCF_004352825.1, s__Luteimonas arsenica, 95.0, 82.95, 0.66; GCF_014212025.1, s__Luteimonas sp014212025, 95.0, 82.85, 0.69; GCF_004352845.1, s__Luteimonas terricola, 95.0, 82.67, 0.64; GCF_007859325.1, s__Luteimonas marina, 95.0, 82.41, 0.62; GCF_007795095.1, s__Luteimonas granuli, 95.0, 82.19, 0.65; GCA_012510865.1, s__Luteimonas sp012510…	90.31
NJASGE2bin.7	NJ_NJASGE2	cultivable	96.93	0.844	16.0097	0.9767	d__Bacteria;p__Proteobacteria;c__Gammaproteobacteria;o__Xanthomonadales;f__Xanthomonadaceae;g__Thermomonas;s__	N/A	N/A	N/A	N/A	N/A	N/A	N/A	N/A	N/A	N/A	d__Bacteria;p__Proteobacteria;c__Gammaproteobacteria;o__Xanthomonadales;f__Xanthomonadaceae;g__Thermomonas;s__	taxonomic classification defined by topology and ANI	N/A	GCF_014395425.1, s__Thermomonas brevis, 95.0, 87.3, 0.86; GCF_000423885.1, s__Thermomonas fusca, 95.0, 87.03, 0.85; GCF_004346265.1, s__Thermomonas haemolytica, 95.0, 86.89, 0.78; GCF_006337105.1, s__Thermomonas sp006337105, 95.0, 84.08, 0.75; GCF_011302915.1, s__Thermomonas sp011302915, 95.0, 82.6, 0.7; GCF_014396975.1, s__Thermomonas carbonis, 95.0, 82.37, 0.73; GCF_900129205.1, s__Thermomonas …	89.26
NJASGE2bin.8	NJ_NJASGE2	cultivable	67.89	1.184	82.94	0.944316	d__Bacteria;p__Proteobacteria;c__Gammaproteobacteria;o__Burkholderiales;f__Rhodocyclaceae;g__Azonexus;s__	N/A	N/A	N/A	N/A	N/A	GCA_004379165.1	95	d__Bacteria;p__Proteobacteria;c__Gammaproteobacteria;o__Burkholderiales;f__Rhodocyclaceae;g__Azonexus;s__Azonexus sp004379165	81.63	0.62	d__Bacteria;p__Proteobacteria;c__Gammaproteobacteria;o__Burkholderiales;f__Rhodocyclaceae;g__Azonexus;s__	taxonomic classification defined by topology and ANI	N/A	GCF_000519045.1, s__Azonexus agitatus, 95.0, 83.05, 0.7; GCF_009469585.1, s__Azonexus sp009469585, 95.0, 82.75, 0.68; GCF_008711155.1, s__Azonexus sp008711155, 95.0, 82.66, 0.68; GCF_009469615.1, s__Azonexus sp009469615, 95.0, 82.6, 0.67; GCF_001551835.1, s__Azonexus denitrificans, 95.0, 82.5, 0.71; GCF_003634965.1, s__Azonexus fungiphilus, 95.0, 82.48, 0.65; GCF_009469765.1, s__Azonexus hortensi…	54.97
NJASGE2bin.9	NJ_NJASGE2	cultivable	66.14	1.388	439.977	0.995147	d__Bacteria;p__Proteobacteria;c__Gammaproteobacteria;o__Burkholderiales;f__Burkholderiaceae;g__Giesbergeria;s__	N/A	N/A	N/A	N/A	N/A	GCF_010020825.1	95	d__Bacteria;p__Proteobacteria;c__Gammaproteobacteria;o__Burkholderiales;f__Burkholderiaceae;g__Giesbergeria;s__Giesbergeria sp010020825	89.35	0.91	d__Bacteria;p__Proteobacteria;c__Gammaproteobacteria;o__Burkholderiales;f__Burkholderiaceae;g__Giesbergeria;s__	taxonomic classification defined by topology and ANI	N/A	GCF_003604195.1, s__Giesbergeria lacusdiani, 95.0, 85.11, 0.82; GCF_000739995.1, s__Giesbergeria granuli, 95.0, 84.74, 0.84; GCA_001770955.1, s__Giesbergeria sp001770955, 95.0, 83.9, 0.74; GCF_003096555.1, s__Giesbergeria sp003096555, 95.0, 82.04, 0.73; GCF_012932145.1, s__Giesbergeria sp012932145, 95.0, 81.84, 0.66; GCF_004341365.1, s__Giesbergeria metamorpha, 95.0, 81.1, 0.6; GCA_001724785.1, s…	76.26
NJASGE3bin.1	NJ_NJASGE3	uncultivable	87.42	1.727	8.11984	0.852887	d__Bacteria;p__Chloroflexota;c__Anaerolineae;o__CG2-30-64-16;f__SSC4;g__SSC4;s__	N/A	N/A	N/A	N/A	N/A	GCA_013693795.1	95	d__Bacteria;p__Chloroflexota;c__Anaerolineae;o__CG2-30-64-16;f__SSC4;g__SSC4;s__SSC4 sp013693795	76.38	0.17	d__Bacteria;p__Chloroflexota;c__Anaerolineae;o__CG2-30-64-16;f__;g__;s__	taxonomic classification defined by topology and ANI	N/A	N/A	84.28
NJASGE3bin.10	NJ_NJASGE3	uncultivable	72.75	0.862	6.96	0.905891	d__Bacteria;p__Bacteroidota;c__Bacteroidia;o__Chitinophagales;f__BACL12;g__UBA7236;s__	N/A	N/A	N/A	N/A	N/A	GCA_002473275.1	95	d__Bacteria;p__Bacteroidota;c__Bacteroidia;o__Chitinophagales;f__BACL12;g__UBA7236;s__UBA7236 sp002473275	76.01	0.06	d__Bacteria;p__Bacteroidota;c__Bacteroidia;o__Chitinophagales;f__BACL12;g__;s__	taxonomic classification defined by topology and ANI	N/A	N/A	63.37
NJASGE3bin.11	NJ_NJASGE3	uncultivable	84.08	9.386	16.8616	0.915552	d__Bacteria;p__Proteobacteria;c__Gammaproteobacteria;o__Steroidobacterales;f__Steroidobacteraceae;g__RPQJ01;s__	N/A	N/A	N/A	N/A	N/A	GCA_003819815.1	95	d__Bacteria;p__Proteobacteria;c__Gammaproteobacteria;o__Steroidobacterales;f__Steroidobacteraceae;g__RPQJ01;s__RPQJ01 sp003819815	80.12	0.41	d__Bacteria;p__Proteobacteria;c__Gammaproteobacteria;o__Steroidobacterales;f__Steroidobacteraceae;g__RPQJ01;s__	taxonomic classification defined by topology and ANI	N/A	GCA_012026925.1, s__RPQJ01 sp012026925, 95.0, 80.17, 0.39; GCA_011391405.1, s__RPQJ01 sp011391405, 95.0, 78.72, 0.34	75.1
NJASGE3bin.12	NJ_NJASGE3	uncultivable	83.05	6.588	6.63143	0.776706	d__Bacteria;p__Acidobacteriota;c__Blastocatellia;o__RBC074;f__RBC074;g__;s__	N/A	N/A	N/A	N/A	N/A	N/A	N/A	N/A	N/A	N/A	d__Bacteria;p__Acidobacteriota;c__Blastocatellia;o__;f__;g__;s__	taxonomic novelty determined using RED	N/A	N/A	68.25
NJASGE3bin.13	NJ_NJASGE3	uncultivable	78.99	7.758	5.15168	0.904581	d__Bacteria;p__KSB1;c__UBA2214;o__DRLW01;f__QEVD01;g__DSNU01;s__	N/A	N/A	N/A	N/A	N/A	GCA_011047125.1	95	d__Bacteria;p__KSB1;c__UBA2214;o__DRLW01;f__QEVD01;g__DSNU01;s__DSNU01 sp011047125	78.52	0.46	d__Bacteria;p__KSB1;c__UBA2214;o__DRLW01;f__QEVD01;g__;s__	taxonomic classification defined by topology and ANI	N/A	N/A	64.94
NJASGE3bin.14	NJ_NJASGE3	uncultivable	98.89	0.474	54.1737	0.931533	d__Bacteria;p__Proteobacteria;c__Alphaproteobacteria;o__Rhizobiales;f__Xanthobacteraceae;g__SCUB01;s__	N/A	N/A	N/A	N/A	N/A	GCA_004297465.1	95	d__Bacteria;p__Proteobacteria;c__Alphaproteobacteria;o__Rhizobiales;f__Xanthobacteraceae;g__SCUB01;s__SCUB01 sp004297465	81.56	0.59	d__Bacteria;p__Proteobacteria;c__Alphaproteobacteria;o__Rhizobiales;f__Xanthobacteraceae;g__;s__	taxonomic classification defined by topology and ANI	N/A	N/A	98.23
NJASGE3bin.15	NJ_NJASGE3	uncultivable	79.6	2.227	6.16103	0.841441	d__Bacteria;p__Bacteroidota;c__Bacteroidia;o__Chitinophagales;f__Saprospiraceae;g__;s__	N/A	N/A	N/A	N/A	N/A	GCA_003648285.1	95	d__Bacteria;p__Bacteroidota;c__Bacteroidia;o__Chitinophagales;f__Saprospiraceae;g__B8-G4;s__B8-G4 sp003648285	75.51	0.01	d__Bacteria;p__Bacteroidota;c__Bacteroidia;o__Chitinophagales;f__Saprospiraceae;g__;s__	taxonomic classification defined by topology and ANI	N/A	N/A	62.52
NJASGE3bin.16	NJ_NJASGE3	uncultivable	100	2.991	123.455	0.737702	d__Bacteria;p__Actinobacteriota;c__Acidimicrobiia;o__Acidimicrobiales;f__;g__;s__	N/A	N/A	N/A	N/A	N/A	N/A	N/A	N/A	N/A	N/A	d__Bacteria;p__Actinobacteriota;c__Acidimicrobiia;o__Acidimicrobiales;f__;g__;s__	taxonomic novelty determined using RED	N/A	N/A	94.28
NJASGE3bin.17	NJ_NJASGE3	uncultivable	82.74	1.612	6.28676	0.821143	d__Bacteria;p__Desulfobacterota;c__Desulfobacteria;o__Desulfobacterales;f__Desulfolunaceae;g__;s__	N/A	N/A	N/A	N/A	N/A	N/A	N/A	N/A	N/A	N/A	d__Bacteria;p__Desulfobacterota;c__Desulfobacteria;o__Desulfobacterales;f__;g__;s__	taxonomic novelty determined using RED	N/A	N/A	58.11
NJASGE3bin.18	NJ_NJASGE3	uncultivable	95.27	7.638	57.9192	0.945819	d__Bacteria;p__Chloroflexota;c__Anaerolineae;o__Promineofilales;f__Promineofilaceae;g__Promineofilum;s__	N/A	N/A	N/A	N/A	N/A	N/A	N/A	N/A	N/A	N/A	d__Bacteria;p__Chloroflexota;c__Anaerolineae;o__Promineofilales;f__Promineofilaceae;g__;s__	taxonomic novelty determined using RED	N/A	N/A	83.32
NJASGE3bin.19	NJ_NJASGE3	uncultivable	65.23	2.631	9.1457	0.851513	d__Bacteria;p__Myxococcota;c__Polyangia;o__Polyangiales;f__Sandaracinaceae;g__MED-G138;s__	N/A	N/A	N/A	N/A	N/A	GCA_004213565.1	95	d__Bacteria;p__Myxococcota;c__Polyangia;o__Polyangiales;f__Sandaracinaceae;g__MED-G138;s__MED-G138 sp004213565	77.76	0.48	d__Bacteria;p__Myxococcota;c__Polyangia;o__Polyangiales;f__Sandaracinaceae;g__;s__	taxonomic classification defined by topology and ANI	N/A	N/A	53.84
NJASGE3bin.2	NJ_NJASGE3	uncultivable	54.06	3.737	5.76986	0.926511	d__Bacteria;p__Chloroflexota;c__Anaerolineae;o__Anaerolineales;f__EnvOPS12;g__;s__	N/A	N/A	N/A	N/A	N/A	N/A	N/A	N/A	N/A	N/A	d__Bacteria;p__Chloroflexota;c__Anaerolineae;o__Anaerolineales;f__EnvOPS12;g__;s__	taxonomic novelty determined using RED	N/A	N/A	43.1
NJASGE3bin.20	NJ_NJASGE3	uncultivable	60.74	1.001	5.43343	0.823017	d__Bacteria;p__Bacteroidota;c__Bacteroidia;o__Chitinophagales;f__UBA10324;g__;s__	N/A	N/A	N/A	N/A	N/A	N/A	N/A	N/A	N/A	N/A	d__Bacteria;p__Bacteroidota;c__Bacteroidia;o__Chitinophagales;f__UBA10324;g__;s__	taxonomic classification fully defined by topology	N/A	N/A	58.47
NJASGE3bin.21	NJ_NJASGE3	uncultivable	71	0.862	8.48801	0.77882	d__Bacteria;p__Chloroflexota;c__Anaerolineae;o__Promineofilales;f__Promineofilaceae;g__;s__	N/A	N/A	N/A	N/A	N/A	N/A	N/A	N/A	N/A	N/A	d__Bacteria;p__Chloroflexota;c__Anaerolineae;o__Promineofilales;f__;g__;s__	taxonomic novelty determined using RED	N/A	N/A	61.72
NJASGE3bin.22	NJ_NJASGE3	uncultivable	95.45	2	18.6881	0.906389	d__Bacteria;p__Chloroflexota;c__Anaerolineae;o__Caldilineales;f__J102;g__JABWBG01;s__	N/A	N/A	N/A	N/A	N/A	GCA_013360575.1	95	d__Bacteria;p__Chloroflexota;c__Anaerolineae;o__Caldilineales;f__J102;g__JABWBG01;s__JABWBG01 sp013360575	77.35	0.28	d__Bacteria;p__Chloroflexota;c__Anaerolineae;o__Caldilineales;f__J102;g__;s__	taxonomic classification defined by topology and ANI	N/A	N/A	90.03
NJASGE3bin.23	NJ_NJASGE3	uncultivable	62.98	4.545	5.82102	0.801461	d__Bacteria;p__Chloroflexota;c__Anaerolineae;o__Anaerolineales;f__UBA6663;g__;s__	N/A	N/A	N/A	N/A	N/A	N/A	N/A	N/A	N/A	N/A	d__Bacteria;p__Chloroflexota;c__Anaerolineae;o__Anaerolineales;f__;g__;s__	taxonomic novelty determined using RED	N/A	N/A	59.5
NJASGE3bin.24	NJ_NJASGE3	uncultivable	73.98	3.818	14.4209	0.97381	d__Bacteria;p__Chloroflexota;c__Anaerolineae;o__Anaerolineales;f__EnvOPS12;g__UBA7227;s__	N/A	N/A	N/A	N/A	N/A	GCA_003598975.1	95	d__Bacteria;p__Chloroflexota;c__Anaerolineae;o__Anaerolineales;f__EnvOPS12;g__UBA7227;s__UBA7227 sp003598975	81.93	0.64	d__Bacteria;p__Chloroflexota;c__Anaerolineae;o__Anaerolineales;f__EnvOPS12;g__UBA7227;s__	taxonomic classification defined by topology and ANI	N/A	GCA_002473085.1, s__UBA7227 sp002473085, 95.0, 79.93, 0.48; GCA_009885445.1, s__UBA7227 sp009885445, 95.0, 76.58, 0.19	72.36
NJASGE3bin.25	NJ_NJASGE3	uncultivable	57.66	1.912	6.0518	0.795523	d__Bacteria;p__Bacteroidota;c__Kapabacteria;o__OLB7;f__OLB7;g__;s__	N/A	N/A	N/A	N/A	N/A	GCA_001567195.1	95	d__Bacteria;p__Bacteroidota;c__Kapabacteria;o__OLB7;f__OLB7;g__OLB7;s__OLB7 sp001567195	75.36	0.01	d__Bacteria;p__Bacteroidota;c__Kapabacteria;o__;f__;g__;s__	taxonomic classification defined by topology and ANI	N/A	N/A	47.31
NJASGE3bin.26	NJ_NJASGE3	uncultivable	85	1.09	19.6739	0.975835	d__Bacteria;p__Chloroflexota;c__Anaerolineae;o__Anaerolineales;f__EnvOPS12;g__UBA12294;s__	N/A	N/A	N/A	N/A	N/A	GCA_002050275.1	95	d__Bacteria;p__Chloroflexota;c__Anaerolineae;o__Anaerolineales;f__EnvOPS12;g__UBA12294;s__UBA12294 sp002050275	81.38	0.45	d__Bacteria;p__Chloroflexota;c__Anaerolineae;o__Anaerolineales;f__EnvOPS12;g__UBA12294;s__	taxonomic classification defined by topology and ANI	N/A	GCA_003577395.1, s__UBA12294 sp003577395, 95.0, 81.67, 0.6; GCA_011362695.1, s__UBA12294 sp011362695, 95.0, 79.55, 0.56; GCA_013360875.1, s__UBA12294 sp013360875, 95.0, 78.0, 0.31; GCA_002418205.1, s__UBA12294 sp002418205, 95.0, 77.76, 0.3; GCA_013388685.1, s__UBA12294 sp013388685, 95.0, 77.74, 0.27; GCA_011331405.1, s__UBA12294 sp011331405, 95.0, 77.64, 0.27; GCA_003484265.1, s__UBA12294 sp00348…	74.23
NJASGE3bin.27	NJ_NJASGE3	uncultivable	95.42	2.009	17.9054	0.992087	d__Bacteria;p__Proteobacteria;c__Gammaproteobacteria;o__Burkholderiales;f__Burkholderiaceae;g__Rubrivivax;s__	N/A	N/A	N/A	N/A	N/A	GCA_011391855.1	95	d__Bacteria;p__Proteobacteria;c__Gammaproteobacteria;o__Burkholderiales;f__Burkholderiaceae;g__Rubrivivax;s__Rubrivivax sp011391855	89.61	0.72	d__Bacteria;p__Proteobacteria;c__Gammaproteobacteria;o__Burkholderiales;f__Burkholderiaceae;g__Rubrivivax;s__	taxonomic classification defined by topology and ANI	N/A	GCA_013822265.1, s__Rubrivivax sp013822265, 95.0, 82.91, 0.58; GCA_903914615.1, s__Rubrivivax sp903914615, 95.0, 82.84, 0.53; GCA_903828235.1, s__Rubrivivax sp903828235, 95.0, 82.37, 0.55; GCF_004016505.1, s__Rubrivivax sp004016505, 95.0, 82.26, 0.58; GCF_001295905.1, s__Rubrivivax sp001295905, 95.0, 82.21, 0.58; GCF_001295865.1, s__Rubrivivax sp001295865, 95.0, 81.97, 0.58; GCA_001725505.1, s__R…	90.67
NJASGE3bin.28	NJ_NJASGE3	uncultivable	53.08	0.942	5.70494	0.938351	d__Bacteria;p__Proteobacteria;c__Alphaproteobacteria;o__Micropepsales;f__Micropepsaceae;g__SZUA-430;s__	N/A	N/A	N/A	N/A	N/A	N/A	N/A	N/A	N/A	N/A	d__Bacteria;p__Proteobacteria;c__Alphaproteobacteria;o__Micropepsales;f__Micropepsaceae;g__SZUA-430;s__	ANI	N/A	GCA_003246795.1, s__SZUA-430 sp003246795, 95.0, 80.09, 0.28; GCA_013140995.1, s__SZUA-430 sp013140995, 95.0, 80.04, 0.55; GCA_902826695.1, s__SZUA-430 sp902826695, 95.0, 79.64, 0.52; GCA_009885515.1, s__SZUA-430 sp009885515, 95.0, 76.84, 0.14	35.54
NJASGE3bin.29	NJ_NJASGE3	uncultivable	83.66	0.933	6.90253	0.399651	d__Bacteria;p__Bdellovibrionota;c__;o__;f__;g__;s__	N/A	N/A	N/A	N/A	N/A	GCA_001799195.1	95	d__Bacteria;p__Bdellovibrionota;c__YA12-FULL-61-11;o__YA12-FULL-61-11;f__YA12-FULL-61-11;g__YA12-FULL-61-11;s__YA12-FULL-61-11 sp001799195	74.36	0	d__Bacteria;p__Bdellovibrionota;c__;o__;f__;g__;s__	taxonomic classification defined by topology and ANI	N/A	N/A	79.57
NJASGE3bin.3	NJ_NJASGE3	uncultivable	96.58	2.136	16.6766	0.949712	d__Bacteria;p__Actinobacteriota;c__Acidimicrobiia;o__Acidimicrobiales;f__Ilumatobacteraceae;g__UBA668;s__	N/A	N/A	N/A	N/A	N/A	N/A	N/A	N/A	N/A	N/A	d__Bacteria;p__Actinobacteriota;c__Acidimicrobiia;o__Acidimicrobiales;f__Ilumatobacteraceae;g__UBA668;s__	ANI	N/A	GCA_009702045.1, s__UBA668 sp009702045, 95.0, 80.96, 0.5; GCA_903919215.1, s__UBA668 sp903919215, 95.0, 80.77, 0.51; GCA_002299395.1, s__UBA668 sp002299395, 95.0, 79.81, 0.51; GCA_005778215.1, s__UBA668 sp005778215, 95.0, 79.69, 0.48; GCA_003154135.1, s__UBA668 sp003154135, 95.0, 79.48, 0.49; GCA_903919455.1, s__UBA668 sp903919455, 95.0, 79.35, 0.4	88.49
NJASGE3bin.30	NJ_NJASGE3	uncultivable	55.17	1.724	8.4882	0.855021	d__Bacteria;p__Acidobacteriota;c__Vicinamibacteria;o__Fen-336;f__Fen-336;g__CADEEV01;s__	N/A	N/A	N/A	N/A	N/A	GCA_902826455.1	95	d__Bacteria;p__Acidobacteriota;c__Vicinamibacteria;o__Fen-336;f__Fen-336;g__CADEEV01;s__CADEEV01 sp902826455	79.9	0.6	d__Bacteria;p__Acidobacteriota;c__Vicinamibacteria;o__Fen-336;f__Fen-336;g__;s__	taxonomic classification defined by topology and ANI	N/A	N/A	51.64
NJASGE3bin.31	NJ_NJASGE3	uncultivable	90	1.19	10.2047	0.89034	d__Bacteria;p__Bacteroidota;c__Bacteroidia;o__AKYH767-A;f__2013-40CM-41-45;g__CAINVI01;s__	N/A	N/A	N/A	N/A	N/A	GCA_903854075.1	95	d__Bacteria;p__Bacteroidota;c__Bacteroidia;o__AKYH767-A;f__2013-40CM-41-45;g__CAINVI01;s__CAINVI01 sp903854075	76.25	0.06	d__Bacteria;p__Bacteroidota;c__Bacteroidia;o__AKYH767-A;f__2013-40CM-41-45;g__;s__	taxonomic classification defined by topology and ANI	N/A	N/A	91.48
NJASGE3bin.32	NJ_NJASGE3	uncultivable	72.7	3.179	7.91479	0.703694	d__Bacteria;p__Myxococcota;c__UBA727;o__UBA727;f__GCA-2721815;g__;s__	N/A	N/A	N/A	N/A	N/A	GCA_002721815.1	95	d__Bacteria;p__Myxococcota;c__UBA727;o__UBA727;f__GCA-2721815;g__GCA-2721815;s__GCA-2721815 sp002721815	75.22	0	d__Bacteria;p__Myxococcota;c__UBA727;o__;f__;g__;s__	taxonomic classification defined by topology and ANI	N/A	N/A	65.04
NJASGE3bin.33	NJ_NJASGE3	uncultivable	59.43	5.444	6.30404	0.963729	d__Bacteria;p__Proteobacteria;c__Gammaproteobacteria;o__Steroidobacterales;f__Steroidobacteraceae;g__CADEFQ01;s__	N/A	N/A	N/A	N/A	N/A	GCA_902826635.1	95	d__Bacteria;p__Proteobacteria;c__Gammaproteobacteria;o__Steroidobacterales;f__Steroidobacteraceae;g__CADEFQ01;s__CADEFQ01 sp902826635	82.03	0.73	d__Bacteria;p__Proteobacteria;c__Gammaproteobacteria;o__Steroidobacterales;f__Steroidobacteraceae;g__CADEFQ01;s__	taxonomic classification defined by topology and ANI	N/A	GCA_902826575.1, s__CADEFQ01 sp902826575, 95.0, 79.87, 0.63	37.2
NJASGE3bin.34	NJ_NJASGE3	uncultivable	55.94	3.637	6.56554	0.85512	d__Bacteria;p__Acidobacteriota;c__Holophagae;o__Holophagales;f__Holophagaceae;g__;s__	N/A	N/A	N/A	N/A	N/A	N/A	N/A	N/A	N/A	N/A	d__Bacteria;p__Acidobacteriota;c__Holophagae;o__Holophagales;f__Holophagaceae;g__;s__	taxonomic classification fully defined by topology	N/A	N/A	46.14
NJASGE3bin.35	NJ_NJASGE3	uncultivable	60.52	9.649	7.81915	N/A	d__Bacteria;p__Nitrospirota;c__Nitrospiria;o__Nitrospirales;f__Nitrospiraceae;g__Nitrospira_A;s__Nitrospira_A sp009594865	GCA_009594865.1	95	d__Bacteria;p__Nitrospirota;c__Nitrospiria;o__Nitrospirales;f__Nitrospiraceae;g__Nitrospira_A;s__Nitrospira_A sp009594865	98.41	0.75	GCA_009594865.1	95	d__Bacteria;p__Nitrospirota;c__Nitrospiria;o__Nitrospirales;f__Nitrospiraceae;g__Nitrospira_A;s__Nitrospira_A sp009594865	98.41	0.75	d__Bacteria;p__Nitrospirota;c__Nitrospiria;o__Nitrospirales;f__Nitrospiraceae;g__Nitrospira_A;s__	taxonomic classification defined by topology and ANI	topological placement and ANI have congruent species assignments	GCA_900696505.1, s__Nitrospira_A sp900696505, 95.0, 85.75, 0.57; GCA_014055465.1, s__Nitrospira_A sp014055465, 95.0, 84.15, 0.75; GCA_902500995.1, s__Nitrospira_A sp902500995, 95.0, 82.61, 0.67; GCF_000196815.1, s__Nitrospira_A defluvii_A, 95.0, 81.52, 0.59; GCA_009594995.1, s__Nitrospira_A sp009594995, 95.0, 81.26, 0.62; GCF_900170025.1, s__Nitrospira_A sp900170025, 95.0, 81.0, 0.59; GCA_0095948…	42.39
NJASGE3bin.36	NJ_NJASGE3	uncultivable	72.36	0.561	11.976	0.633897	d__Bacteria;p__Patescibacteria;c__Dojkabacteria;o__B142;f__;g__;s__	N/A	N/A	N/A	N/A	N/A	N/A	N/A	N/A	N/A	N/A	d__Bacteria;p__Patescibacteria;c__Dojkabacteria;o__B142;f__;g__;s__	taxonomic novelty determined using RED	N/A	N/A	69.49
NJASGE3bin.37	NJ_NJASGE3	uncultivable	95.53	1.098	48.9	0.815336	d__Bacteria;p__KSB1;c__UBA2214;o__DRLW01;f__QEVD01;g__;s__	N/A	N/A	N/A	N/A	N/A	N/A	N/A	N/A	N/A	N/A	d__Bacteria;p__KSB1;c__UBA2214;o__DRLW01;f__QEVD01;g__;s__	taxonomic novelty determined using RED	N/A	N/A	95.39
NJASGE3bin.38	NJ_NJASGE3	uncultivable	65.31	0	6.59502	0.895162	d__Bacteria;p__Chloroflexota;c__Anaerolineae;o__Anaerolineales;f__UBA4823;g__;s__	N/A	N/A	N/A	N/A	N/A	N/A	N/A	N/A	N/A	N/A	d__Bacteria;p__Chloroflexota;c__Anaerolineae;o__Anaerolineales;f__UBA4823;g__;s__	taxonomic classification fully defined by topology	N/A	N/A	52.61
NJASGE3bin.39	NJ_NJASGE3	uncultivable	68.51	7.609	5.79506	0.440815	d__Bacteria;p__Zixibacteria;c__MSB-5A5;o__;f__;g__;s__	N/A	N/A	N/A	N/A	N/A	N/A	N/A	N/A	N/A	N/A	d__Bacteria;p__Zixibacteria;c__MSB-5A5;o__;f__;g__;s__	taxonomic classification fully defined by topology	N/A	N/A	53.25
NJASGE3bin.4	NJ_NJASGE3	uncultivable	88.44	6.435	25.2279	0.935369	d__Bacteria;p__Proteobacteria;c__Gammaproteobacteria;o__Burkholderiales;f__Rhodocyclaceae;g__Fen-999;s__	N/A	N/A	N/A	N/A	N/A	GCA_003158255.1	95	d__Bacteria;p__Proteobacteria;c__Gammaproteobacteria;o__Burkholderiales;f__Rhodocyclaceae;g__Fen-999;s__Fen-999 sp003158255	79.85	0.37	d__Bacteria;p__Proteobacteria;c__Gammaproteobacteria;o__Burkholderiales;f__Rhodocyclaceae;g__Fen-999;s__	taxonomic classification defined by topology and ANI	N/A	GCA_003157035.1, s__Fen-999 sp003157035, 95.0, 78.89, 0.32	67.32
NJASGE3bin.40	NJ_NJASGE3	uncultivable	50.56	9.892	4.60889	0.675709	d__Bacteria;p__Myxococcota;c__Polyangia;o__Palsa-1104;f__;g__;s__	N/A	N/A	N/A	N/A	N/A	N/A	N/A	N/A	N/A	N/A	d__Bacteria;p__Myxococcota;c__Polyangia;o__Palsa-1104;f__;g__;s__	taxonomic novelty determined using RED	N/A	N/A	30.26
NJASGE3bin.41	NJ_NJASGE3	uncultivable	51.61	5.924	8.41116	0.996233	d__Bacteria;p__Chloroflexota;c__Anaerolineae;o__Anaerolineales;f__EnvOPS12;g__OLB14;s__	N/A	N/A	N/A	N/A	N/A	GCA_013140605.1	95	d__Bacteria;p__Chloroflexota;c__Anaerolineae;o__Anaerolineales;f__EnvOPS12;g__OLB14;s__OLB14 sp013140605	86.89	0.43	d__Bacteria;p__Chloroflexota;c__Anaerolineae;o__Anaerolineales;f__EnvOPS12;g__OLB14;s__	taxonomic classification defined by topology and ANI	N/A	GCA_903914955.1, s__OLB14 sp903914955, 95.0, 79.56, 0.25; GCA_014379595.1, s__OLB14 sp014379595, 95.0, 78.28, 0.2; GCA_009885525.1, s__OLB14 sp009885525, 95.0, 78.01, 0.16; GCA_008363285.1, s__OLB14 sp008363285, 95.0, 77.37, 0.08; GCA_013388795.1, s__OLB14 sp013388795, 95.0, 77.17, 0.1; GCA_002343775.1, s__OLB14 sp002343775, 95.0, 77.09, 0.15; GCA_903837815.1, s__OLB14 sp903837815, 95.0, 77.07, 0…	33.33
NJASGE3bin.5	NJ_NJASGE3	uncultivable	52.02	8.545	5.15037	0.936478	d__Bacteria;p__Proteobacteria;c__Gammaproteobacteria;o__Burkholderiales;f__Thiobacillaceae;g__PFJX01;s__	N/A	N/A	N/A	N/A	N/A	GCA_009772925.1	95	d__Bacteria;p__Proteobacteria;c__Gammaproteobacteria;o__Burkholderiales;f__Thiobacillaceae;g__PFJX01;s__PFJX01 sp009772925	82.3	0.73	d__Bacteria;p__Proteobacteria;c__Gammaproteobacteria;o__Burkholderiales;f__Thiobacillaceae;g__PFJX01;s__	taxonomic classification defined by topology and ANI	N/A	GCA_002784045.1, s__PFJX01 sp002784045, 95.0, 79.24, 0.42; GCA_002281555.1, s__PFJX01 sp002281555, 95.0, 79.12, 0.44; GCA_903918705.1, s__PFJX01 sp903918705, 95.0, 79.07, 0.44; GCA_903835655.1, s__PFJX01 sp903835655, 95.0, 78.62, 0.41; GCA_903883985.1, s__PFJX01 sp903883985, 95.0, 77.87, 0.33	32.82
NJASGE3bin.6	NJ_NJASGE3	uncultivable	68.93	8.424	5.62246	0.978594	d__Bacteria;p__Chloroflexota;c__Anaerolineae;o__Promineofilales;f__Promineofilaceae;g__Promineofilum;s__	N/A	N/A	N/A	N/A	N/A	GCA_014237545.1	95	d__Bacteria;p__Chloroflexota;c__Anaerolineae;o__Promineofilales;f__Promineofilaceae;g__Promineofilum;s__Promineofilum sp014237545	80.1	0.51	d__Bacteria;p__Chloroflexota;c__Anaerolineae;o__Promineofilales;f__Promineofilaceae;g__Promineofilum;s__	taxonomic classification defined by topology and ANI	N/A	GCF_900066015.1, s__Promineofilum breve, 95.0, 79.31, 0.53	49.24
NJASGE3bin.7	NJ_NJASGE3	uncultivable	95	1.98	26.7675	0.786336	d__Bacteria;p__Bacteroidota;c__Bacteroidia;o__Chitinophagales;f__Saprospiraceae;g__;s__	N/A	N/A	N/A	N/A	N/A	N/A	N/A	N/A	N/A	N/A	d__Bacteria;p__Bacteroidota;c__Bacteroidia;o__Chitinophagales;f__Saprospiraceae;g__;s__	taxonomic classification fully defined by topology	N/A	N/A	93.05
NJASGE3bin.8	NJ_NJASGE3	uncultivable	50.45	7.181	28.3	N/A	d__Bacteria;p__Nitrospirota;c__Nitrospiria;o__Nitrospirales;f__Nitrospiraceae;g__Nitrospira_A;s__Nitrospira_A sp009594855	GCA_009594855.1	95	d__Bacteria;p__Nitrospirota;c__Nitrospiria;o__Nitrospirales;f__Nitrospiraceae;g__Nitrospira_A;s__Nitrospira_A sp009594855	99.22	0.92	GCA_009594855.1	95	d__Bacteria;p__Nitrospirota;c__Nitrospiria;o__Nitrospirales;f__Nitrospiraceae;g__Nitrospira_A;s__Nitrospira_A sp009594855	99.22	0.92	d__Bacteria;p__Nitrospirota;c__Nitrospiria;o__Nitrospirales;f__Nitrospiraceae;g__Nitrospira_A;s__	taxonomic classification defined by topology and ANI	topological placement and ANI have congruent species assignments	GCA_011525625.1, s__Nitrospira_A sp003456605, 95.0, 82.93, 0.79; GCA_014055495.1, s__Nitrospira_A sp014055495, 95.0, 82.74, 0.71; GCF_900170025.1, s__Nitrospira_A sp900170025, 95.0, 82.04, 0.61; GCF_000196815.1, s__Nitrospira_A defluvii_A, 95.0, 81.56, 0.62; GCA_014055465.1, s__Nitrospira_A sp014055465, 95.0, 81.55, 0.69; GCA_902500715.1, s__Nitrospira_A sp902500715, 95.0, 81.41, 0.52; GCA_009594…	34.15
NJASGE3bin.9	NJ_NJASGE3	uncultivable	54.38	5.172	5.67657	0.920698	d__Bacteria;p__Proteobacteria;c__Gammaproteobacteria;o__Chromatiales;f__Chromatiaceae;g__M0108;s__	N/A	N/A	N/A	N/A	N/A	N/A	N/A	N/A	N/A	N/A	d__Bacteria;p__Proteobacteria;c__Gammaproteobacteria;o__Chromatiales;f__Chromatiaceae;g__;s__	taxonomic novelty determined using RED	N/A	N/A	37.72
ORI4bin.1	EBPR_ORI4	uncultivable	73.04	2.351	4.3511	0.720381	d__Bacteria;p__Bacteroidota;c__Ignavibacteria;o__SJA-28;f__;g__;s__	N/A	N/A	N/A	N/A	N/A	N/A	N/A	N/A	N/A	N/A	d__Bacteria;p__Bacteroidota;c__Ignavibacteria;o__SJA-28;f__;g__;s__	taxonomic novelty determined using RED	N/A	N/A	59.54
ORI4bin.10	EBPR_ORI4	uncultivable	77.05	2.083	4.60593	0.951249	d__Bacteria;p__Bacteroidota;c__Bacteroidia;o__Cytophagales;f__Cyclobacteriaceae;g__ELB16-189;s__	N/A	N/A	N/A	N/A	N/A	N/A	N/A	N/A	N/A	N/A	d__Bacteria;p__Bacteroidota;c__Bacteroidia;o__Cytophagales;f__Cyclobacteriaceae;g__ELB16-189;s__	ANI	N/A	GCA_003537495.1, s__ELB16-189 sp003537495, 95.0, 78.7, 0.24; GCA_013414665.1, s__ELB16-189 sp013414665, 95.0, 78.3, 0.28; GCA_002352225.1, s__ELB16-189 sp002352225, 95.0, 78.23, 0.31; GCA_001567185.1, s__ELB16-189 sp001567185, 95.0, 78.09, 0.27; GCA_002398365.1, s__ELB16-189 sp002398365, 95.0, 77.05, 0.1; GCA_013285845.1, s__ELB16-189 sp013285845, 95.0, 77.02, 0.03; GCA_002345965.1, s__ELB16-189 …	68.99
ORI4bin.11	EBPR_ORI4	uncultivable	80.17	9.68	47.8765	0.947591	d__Bacteria;p__Proteobacteria;c__Alphaproteobacteria;o__Caulobacterales;f__Hyphomonadaceae;g__UBA1942;s__	N/A	N/A	N/A	N/A	N/A	N/A	N/A	N/A	N/A	N/A	d__Bacteria;p__Proteobacteria;c__Alphaproteobacteria;o__Caulobacterales;f__Hyphomonadaceae;g__UBA1942;s__	ANI	N/A	GCA_002337085.1, s__UBA1942 sp002337085, 95.0, 77.66, 0.13; GCA_009773395.1, s__UBA1942 sp009773395, 95.0, 76.94, 0.11; GCA_002336965.1, s__UBA1942 sp002336965, 95.0, 76.23, 0.13	59.32
ORI4bin.12	EBPR_ORI4	uncultivable	96.69	0.158	1587.83	N/A	d__Bacteria;p__Proteobacteria;c__Gammaproteobacteria;o__Burkholderiales;f__Rhodocyclaceae;g__Accumulibacter;s__Accumulibacter sp005524045	GCA_013347225.1	95	d__Bacteria;p__Proteobacteria;c__Gammaproteobacteria;o__Burkholderiales;f__Rhodocyclaceae;g__Accumulibacter;s__Accumulibacter sp005524045	98.91	0.92	GCA_013347225.1	95	d__Bacteria;p__Proteobacteria;c__Gammaproteobacteria;o__Burkholderiales;f__Rhodocyclaceae;g__Accumulibacter;s__Accumulibacter sp005524045	98.91	0.92	d__Bacteria;p__Proteobacteria;c__Gammaproteobacteria;o__Burkholderiales;f__Rhodocyclaceae;g__Accumulibacter;s__	taxonomic classification defined by topology and ANI	topological placement and ANI have congruent species assignments	GCA_002345025.1, s__Accumulibacter phosphatis_B, 95.0, 87.7, 0.72; GCA_000585015.1, s__Accumulibacter sp000585015, 95.0, 87.19, 0.75; GCF_000024165.1, s__Accumulibacter phosphatis_C, 95.0, 79.97, 0.51; GCF_012940005.1, s__Accumulibacter phosphatis_H, 95.0, 79.65, 0.46; GCA_000585075.1, s__Accumulibacter sp000585075, 95.0, 79.39, 0.45; GCF_900089955.1, s__Accumulibacter aalborgensis, 95.0, 79.26, …	77.61
ORI4bin.13	EBPR_ORI4	uncultivable	69.38	1.08	11.9917	0.818146	d__Bacteria;p__Patescibacteria;c__UBA1384;o__CAILIB01;f__CAILIB01;g__;s__	N/A	N/A	N/A	N/A	N/A	GCA_903834195.1	95	d__Bacteria;p__Patescibacteria;c__UBA1384;o__CAILIB01;f__CAILIB01;g__CAILIB01;s__CAILIB01 sp903834195	81.34	0.02	d__Bacteria;p__Patescibacteria;c__UBA1384;o__;f__;g__;s__	taxonomic classification defined by topology and ANI	N/A	N/A	67.14
ORI4bin.14	EBPR_ORI4	uncultivable	52.18	0.103	4.58593	0.99107	d__Bacteria;p__Planctomycetota;c__Phycisphaerae;o__Phycisphaerales;f__SM1A02;g__UBA2396;s__	N/A	N/A	N/A	N/A	N/A	GCA_002343325.1	95	d__Bacteria;p__Planctomycetota;c__Phycisphaerae;o__Phycisphaerales;f__SM1A02;g__UBA2396;s__UBA2396 sp002343325	86.51	0.85	d__Bacteria;p__Planctomycetota;c__Phycisphaerae;o__Phycisphaerales;f__SM1A02;g__;s__	taxonomic classification defined by topology and ANI	N/A	N/A	39.59
ORI4bin.15	EBPR_ORI4.	cultivable (ANI >99% compared with the same sample source culture plate MAG)	95.94	5.453	9.81255	N/A	d__Bacteria;p__Proteobacteria;c__Gammaproteobacteria;o__Burkholderiales;f__Rhodocyclaceae;g__Zoogloea;s__Zoogloea sp008011925	GCA_008011925.1	95	d__Bacteria;p__Proteobacteria;c__Gammaproteobacteria;o__Burkholderiales;f__Rhodocyclaceae;g__Zoogloea;s__Zoogloea sp008011925	97.91	0.82	GCA_008011925.1	95	d__Bacteria;p__Proteobacteria;c__Gammaproteobacteria;o__Burkholderiales;f__Rhodocyclaceae;g__Zoogloea;s__Zoogloea sp008011925	97.91	0.82	d__Bacteria;p__Proteobacteria;c__Gammaproteobacteria;o__Burkholderiales;f__Rhodocyclaceae;g__Zoogloea;s__	taxonomic classification defined by topology and ANI	topological placement and ANI have congruent species assignments	GCA_009026175.1, s__Zoogloea sp009026175, 95.0, 83.7, 0.57; GCF_012927165.1, s__Zoogloea sp012927165, 95.0, 83.6, 0.63; GCF_008107625.1, s__Zoogloea oleivorans, 95.0, 82.59, 0.57; GCF_009469605.1, s__Zoogloea sp009469605, 95.0, 82.53, 0.58; GCF_006539865.1, s__Zoogloea ramigera, 95.0, 82.23, 0.52; GCF_002028455.1, s__Zoogloea sp002028455, 95.0, 82.0, 0.55	76.79
ORI4bin.16	EBPR_ORI4	uncultivable	65.51	0	13.0722	N/A	d__Bacteria;p__Proteobacteria;c__Gammaproteobacteria;o__Competibacterales;f__Competibacteraceae;g__Plasticicumulans;s__Plasticicumulans sp003962905	GCA_003962905.1	95	d__Bacteria;p__Proteobacteria;c__Gammaproteobacteria;o__Competibacterales;f__Competibacteraceae;g__Plasticicumulans;s__Plasticicumulans sp003962905	97.28	0.69	GCA_003962905.1	95	d__Bacteria;p__Proteobacteria;c__Gammaproteobacteria;o__Competibacterales;f__Competibacteraceae;g__Plasticicumulans;s__Plasticicumulans sp003962905	97.28	0.69	d__Bacteria;p__Proteobacteria;c__Gammaproteobacteria;o__Competibacterales;f__Competibacteraceae;g__Plasticicumulans;s__	taxonomic classification defined by topology and ANI	topological placement and ANI have congruent species assignments	GCF_003182095.1, s__Plasticicumulans acidivorans, 95.0, 80.57, 0.61	63.31
ORI4bin.17	EBPR_ORI4	uncultivable	100	2.04	25.6476	0.961512	d__Bacteria;p__Verrucomicrobiota;c__Verrucomicrobiae;o__Verrucomicrobiales;f__DEV007;g__Arctic95D-9;s__	N/A	N/A	N/A	N/A	N/A	N/A	N/A	N/A	N/A	N/A	d__Bacteria;p__Verrucomicrobiota;c__Verrucomicrobiae;o__Verrucomicrobiales;f__DEV007;g__Arctic95D-9;s__	ANI	N/A	GCA_002396885.1, s__Arctic95D-9 sp002396885, 95.0, 80.48, 0.47; GCA_002344525.1, s__Arctic95D-9 sp002344525, 95.0, 79.86, 0.49; GCA_002288445.1, s__Arctic95D-9 sp002288445, 95.0, 79.55, 0.5; GCA_007123695.1, s__Arctic95D-9 sp007123695, 95.0, 78.81, 0.39; GCA_002344215.1, s__Arctic95D-9 sp002344215, 95.0, 78.37, 0.26; GCA_002422425.1, s__Arctic95D-9 sp002422425, 95.0, 78.21, 0.34; GCA_012719225.1,…	91.98
ORI4bin.18	EBPR_ORI4	uncultivable	97.96	0.666	10.2934	0.936606	d__Bacteria;p__Proteobacteria;c__Alphaproteobacteria;o__Micavibrionales_A;f__RGZA01;g__RGZA01;s__	N/A	N/A	N/A	N/A	N/A	GCA_010031785.1	95	d__Bacteria;p__Proteobacteria;c__Alphaproteobacteria;o__Micavibrionales_A;f__RGZA01;g__RGZA01;s__RGZA01 sp010031785	78.63	0.46	d__Bacteria;p__Proteobacteria;c__Alphaproteobacteria;o__Micavibrionales_A;f__;g__;s__	taxonomic classification defined by topology and ANI	N/A	N/A	97.16
ORI4bin.19	EBPR_ORI4	uncultivable	87.95	0.546	5.46907	0.981288	d__Bacteria;p__Bacteroidota;c__Kapabacteria;o__Kapabacteriales;f__UBA961;g__UBA2353;s__	N/A	N/A	N/A	N/A	N/A	GCA_002344005.1	95	d__Bacteria;p__Bacteroidota;c__Kapabacteria;o__Kapabacteriales;f__UBA961;g__UBA2353;s__UBA2353 sp002344005	85.11	0.78	d__Bacteria;p__Bacteroidota;c__Kapabacteria;o__Kapabacteriales;f__UBA961;g__;s__	taxonomic classification defined by topology and ANI	N/A	N/A	85.05
ORI4bin.2	EBPR_ORI4	uncultivable	64.53	4.334	4.24433	0.953978	d__Bacteria;p__Proteobacteria;c__Alphaproteobacteria;o__Rhizobiales;f__Aestuariivirgaceae;g__Aestuariivirga;s__	N/A	N/A	N/A	N/A	N/A	GCA_003151375.1	95	d__Bacteria;p__Proteobacteria;c__Alphaproteobacteria;o__Rhizobiales;f__Aestuariivirgaceae;g__Aestuariivirga;s__Aestuariivirga sp003151375	75.99	0.05	d__Bacteria;p__Proteobacteria;c__Alphaproteobacteria;o__Rhizobiales;f__Aestuariivirgaceae;g__Aestuariivirga;s__	taxonomic classification defined by topology and ANI	N/A	GCF_003234965.1, s__Aestuariivirga litoralis, 95.0, 77.76, 0.35; GCA_903930095.1, s__Aestuariivirga sp903930095, 95.0, 77.69, 0.22; GCA_900298995.1, s__Aestuariivirga sp900298995, 95.0, 77.54, 0.24; GCA_014380505.1, s__Aestuariivirga sp014380505, 95.0, 76.71, 0.11; GCA_902826365.1, s__Aestuariivirga sp902826365, 95.0, 76.7, 0.24; GCA_012032065.1, s__Aestuariivirga sp012032065, 95.0, 76.64, 0.18; …	48.9
ORI4bin.20	EBPR_ORI4	uncultivable	90.08	1.366	5.07614	0.931073	d__Bacteria;p__Bacteroidota;c__Bacteroidia;o__Cytophagales;f__Cyclobacteriaceae;g__ELB16-189;s__	N/A	N/A	N/A	N/A	N/A	N/A	N/A	N/A	N/A	N/A	d__Bacteria;p__Bacteroidota;c__Bacteroidia;o__Cytophagales;f__Cyclobacteriaceae;g__ELB16-189;s__	ANI	N/A	GCA_013285945.1, s__ELB16-189 sp013285945, 95.0, 77.07, 0.02; GCA_003504855.1, s__ELB16-189 sp003504855, 95.0, 76.86, 0.09; GCA_003537495.1, s__ELB16-189 sp003537495, 95.0, 76.66, 0.02; GCA_013298505.1, s__ELB16-189 sp013298505, 95.0, 76.61, 0.01; GCA_002344795.1, s__ELB16-189 sp002344795, 95.0, 76.46, 0.02; GCA_002345965.1, s__ELB16-189 sp002345965, 95.0, 76.34, 0.02; GCA_013141055.1, s__ELB16-1…	77.8
ORI4bin.22	EBPR_ORI4	uncultivable	94.42	1.092	15.2623	0.903623	d__Bacteria;p__Bacteroidota;c__Ignavibacteria;o__SJA-28;f__OLB5;g__;s__	N/A	N/A	N/A	N/A	N/A	N/A	N/A	N/A	N/A	N/A	d__Bacteria;p__Bacteroidota;c__Ignavibacteria;o__SJA-28;f__OLB5;g__;s__	taxonomic novelty determined using RED	N/A	N/A	95.14
ORI4bin.23	EBPR_ORI4	uncultivable	92.51	2.368	15.4319	0.850148	d__Bacteria;p__Proteobacteria;c__Gammaproteobacteria;o__Burkholderiales;f__Rhodocyclaceae;g__;s__	N/A	N/A	N/A	N/A	N/A	N/A	N/A	N/A	N/A	N/A	d__Bacteria;p__Proteobacteria;c__Gammaproteobacteria;o__Burkholderiales;f__Rhodocyclaceae;g__;s__	taxonomic classification fully defined by topology	N/A	N/A	71.27
ORI4bin.24	EBPR_ORI4	uncultivable	77.9	0.102	11.913	0.810767	d__Bacteria;p__Patescibacteria;c__Paceibacteria;o__UBA6257;f__GWB1-50-10;g__;s__	N/A	N/A	N/A	N/A	N/A	GCA_001779535.1	95	d__Bacteria;p__Patescibacteria;c__Paceibacteria;o__UBA6257;f__GWB1-50-10;g__GWA2-45-9;s__GWA2-45-9 sp001779535	79.91	0.03	d__Bacteria;p__Patescibacteria;c__Paceibacteria;o__UBA6257;f__GWB1-50-10;g__;s__	taxonomic classification defined by topology and ANI	N/A	N/A	62.87
ORI4bin.26	EBPR_ORI4	uncultivable	50.28	1.724	3.65904	0.943252	d__Bacteria;p__Proteobacteria;c__Alphaproteobacteria;o__Caulobacterales;f__Hyphomonadaceae;g__UBA1942;s__	N/A	N/A	N/A	N/A	N/A	N/A	N/A	N/A	N/A	N/A	d__Bacteria;p__Proteobacteria;c__Alphaproteobacteria;o__Caulobacterales;f__Hyphomonadaceae;g__UBA1942;s__	ANI	N/A	GCA_002336965.1, s__UBA1942 sp002336965, 95.0, 76.59, 0.2; GCA_002337085.1, s__UBA1942 sp002337085, 95.0, 76.48, 0.21; GCA_009773395.1, s__UBA1942 sp009773395, 95.0, 76.22, 0.12	33.93
ORI4bin.27	EBPR_ORI4	uncultivable	71.99	2.339	5.15218	N/A	d__Bacteria;p__Planctomycetota;c__UBA8742;o__UBA2392;f__UBA2392;g__UBA2392;s__UBA2392 sp002343805	GCA_002343805.1	95	d__Bacteria;p__Planctomycetota;c__UBA8742;o__UBA2392;f__UBA2392;g__UBA2392;s__UBA2392 sp002343805	98.75	0.86	GCA_002343805.1	95	d__Bacteria;p__Planctomycetota;c__UBA8742;o__UBA2392;f__UBA2392;g__UBA2392;s__UBA2392 sp002343805	98.75	0.86	d__Bacteria;p__Planctomycetota;c__UBA8742;o__UBA2392;f__UBA2392;g__UBA2392;s__	taxonomic classification defined by topology and ANI	topological placement and ANI have congruent species assignments	GCA_003576915.1, s__UBA2392 sp003576915, 95.0, 89.74, 0.96	62.7
ORI4bin.28	EBPR_ORI4	uncultivable	75	2.272	11.8649	0.625603	d__Bacteria;p__Planctomycetota;c__UBA1135;o__PLA2;f__;g__;s__	N/A	N/A	N/A	N/A	N/A	GCA_011525755.1	95	d__Bacteria;p__Planctomycetota;c__UBA1135;o__PLA2;f__PLA2;g__PLA2;s__PLA2 sp011525755	76.29	0.22	d__Bacteria;p__Planctomycetota;c__UBA1135;o__;f__;g__;s__	taxonomic classification defined by topology and ANI	N/A	N/A	69.09
ORI4bin.29	EBPR_ORI4	uncultivable	84.84	3.342	6.12861	0.949869	d__Bacteria;p__Proteobacteria;c__Gammaproteobacteria;o__Burkholderiales;f__Rhodocyclaceae;g__Accumulibacter;s__	N/A	N/A	N/A	N/A	N/A	N/A	N/A	N/A	N/A	N/A	d__Bacteria;p__Proteobacteria;c__Gammaproteobacteria;o__Burkholderiales;f__Rhodocyclaceae;g__Accumulibacter;s__	ANI	N/A	GCA_000585075.1, s__Accumulibacter sp000585075, 95.0, 81.21, 0.6; GCF_012939955.1, s__Accumulibacter phosphatis_G, 95.0, 80.94, 0.57; GCA_000987445.1, s__Accumulibacter phosphatis_A, 95.0, 80.85, 0.42; GCA_000585055.1, s__Accumulibacter sp000585055, 95.0, 80.84, 0.58; GCA_003332265.1, s__Accumulibacter phosphatis_F, 95.0, 80.76, 0.55; GCF_000024165.1, s__Accumulibacter phosphatis_C, 95.0, 79.92, …	74.17
ORI4bin.3	EBPR_ORI4	uncultivable	96.58	3.418	11.4392	0.783152	d__Bacteria;p__Acidobacteriota;c__Blastocatellia;o__Chloracidobacteriales;f__Chloracidobacteriaceae;g__;s__	N/A	N/A	N/A	N/A	N/A	N/A	N/A	N/A	N/A	N/A	d__Bacteria;p__Acidobacteriota;c__Blastocatellia;o__;f__;g__;s__	taxonomic novelty determined using RED	N/A	N/A	95.87
ORI4bin.30	EBPR_ORI4	uncultivable	94.9	0.925	9.80208	0.901483	d__Bacteria;p__Armatimonadota;c__Fimbriimonadia;o__Fimbriimonadales;f__Fimbriimonadaceae;g__UBA2391;s__	N/A	N/A	N/A	N/A	N/A	GCA_002343825.1	95	d__Bacteria;p__Armatimonadota;c__Fimbriimonadia;o__Fimbriimonadales;f__Fimbriimonadaceae;g__UBA2391;s__UBA2391 sp002343825	76.18	0.07	d__Bacteria;p__Armatimonadota;c__Fimbriimonadia;o__Fimbriimonadales;f__Fimbriimonadaceae;g__;s__	taxonomic classification defined by topology and ANI	N/A	N/A	87.55
ORI4bin.31	EBPR_ORI4	uncultivable	99.29	0.176	19.6087	0.961606	d__Bacteria;p__Bacteroidota;c__Bacteroidia;o__Flavobacteriales;f__Flavobacteriaceae;g__Flavobacterium;s__	N/A	N/A	N/A	N/A	N/A	N/A	N/A	N/A	N/A	N/A	d__Bacteria;p__Bacteroidota;c__Bacteroidia;o__Flavobacteriales;f__Flavobacteriaceae;g__Flavobacterium;s__	ANI	N/A	GCF_003268855.1, s__Flavobacterium aciduliphilum, 95.0, 78.3, 0.19; GCF_014486675.1, s__Flavobacterium macrobrachii, 95.0, 78.02, 0.21; GCF_013072765.1, s__Flavobacterium sp013072765, 95.0, 77.94, 0.21; GCA_001464475.1, s__Flavobacterium sp001464475, 95.0, 77.77, 0.21; GCA_014642275.1, s__Flavobacterium lutivivi, 95.0, 77.67, 0.23; GCF_012911605.1, s__Flavobacterium sp012911605, 95.0, 77.59, 0.24…	98.31
ORI4bin.32	EBPR_ORI4	uncultivable	98.8	2.086	37.5165	N/A	d__Bacteria;p__Proteobacteria;c__Gammaproteobacteria;o__Burkholderiales;f__Rhodocyclaceae;g__Accumulibacter;s__Accumulibacter sp000585075	GCA_000585075.1	95	d__Bacteria;p__Proteobacteria;c__Gammaproteobacteria;o__Burkholderiales;f__Rhodocyclaceae;g__Accumulibacter;s__Accumulibacter sp000585075	97.45	0.84	GCA_000585075.1	95	d__Bacteria;p__Proteobacteria;c__Gammaproteobacteria;o__Burkholderiales;f__Rhodocyclaceae;g__Accumulibacter;s__Accumulibacter sp000585075	97.45	0.84	d__Bacteria;p__Proteobacteria;c__Gammaproteobacteria;o__Burkholderiales;f__Rhodocyclaceae;g__Accumulibacter;s__	taxonomic classification defined by topology and ANI	topological placement and ANI have congruent species assignments	GCF_012939955.1, s__Accumulibacter phosphatis_G, 95.0, 86.08, 0.73; GCA_000585055.1, s__Accumulibacter sp000585055, 95.0, 85.95, 0.73; GCA_003332265.1, s__Accumulibacter phosphatis_F, 95.0, 85.88, 0.7; GCA_000987445.1, s__Accumulibacter phosphatis_A, 95.0, 85.66, 0.73; GCF_900089955.1, s__Accumulibacter aalborgensis, 95.0, 80.04, 0.48; GCF_000024165.1, s__Accumulibacter phosphatis_C, 95.0, 79.92,…	93.55
ORI4bin.33	EBPR_ORI4	uncultivable	74.56	0	6.31452	N/A	d__Bacteria;p__Nitrospirota;c__Nitrospiria;o__Nitrospirales;f__Nitrospiraceae;g__Nitrospira_A;s__Nitrospira_A sp014055465	GCA_014055465.1	95	d__Bacteria;p__Nitrospirota;c__Nitrospiria;o__Nitrospirales;f__Nitrospiraceae;g__Nitrospira_A;s__Nitrospira_A sp014055465	99.4	0.97	GCA_014055465.1	95	d__Bacteria;p__Nitrospirota;c__Nitrospiria;o__Nitrospirales;f__Nitrospiraceae;g__Nitrospira_A;s__Nitrospira_A sp014055465	99.4	0.97	d__Bacteria;p__Nitrospirota;c__Nitrospiria;o__Nitrospirales;f__Nitrospiraceae;g__Nitrospira_A;s__	taxonomic classification defined by topology and ANI	topological placement and ANI have congruent species assignments	GCA_009594865.1, s__Nitrospira_A sp009594865, 95.0, 84.48, 0.76; GCA_900696505.1, s__Nitrospira_A sp900696505, 95.0, 84.26, 0.6; GCA_902500995.1, s__Nitrospira_A sp902500995, 95.0, 83.32, 0.75; GCA_009594995.1, s__Nitrospira_A sp009594995, 95.0, 82.21, 0.7; GCA_009594855.1, s__Nitrospira_A sp009594855, 95.0, 82.13, 0.65; GCF_900170025.1, s__Nitrospira_A sp900170025, 95.0, 80.42, 0.62; GCA_0140554…	65.24
ORI4bin.34	EBPR_ORI4	uncultivable	64.71	2.08	5.39671	0.940739	d__Bacteria;p__Verrucomicrobiota;c__Verrucomicrobiae;o__Verrucomicrobiales;f__Verrucomicrobiaceae;g__Prosthecobacter;s__	N/A	N/A	N/A	N/A	N/A	N/A	N/A	N/A	N/A	N/A	d__Bacteria;p__Verrucomicrobiota;c__Verrucomicrobiae;o__Verrucomicrobiales;f__Verrucomicrobiaceae;g__Prosthecobacter;s__	ANI	N/A	GCA_003506995.1, s__Prosthecobacter sp003506995, 95.0, 80.79, 0.56; GCA_002336895.1, s__Prosthecobacter sp002336895, 95.0, 79.51, 0.51; GCA_002343505.1, s__Prosthecobacter sp002343505, 95.0, 79.45, 0.33; GCA_903848465.1, s__Prosthecobacter sp903848465, 95.0, 79.39, 0.47; GCA_002279765.1, s__Prosthecobacter sp002279765, 95.0, 79.3, 0.5; GCF_014203095.1, s__Prosthecobacter vanneervenii, 95.0, 79.26…	55.67
ORI4bin.36	EBPR_ORI4	uncultivable	80.94	1.71	4.87529	0.952888	d__Bacteria;p__Bacteroidota;c__Bacteroidia;o__Bacteroidales;f__Paludibacteraceae;g__Paludibacter;s__	N/A	N/A	N/A	N/A	N/A	N/A	N/A	N/A	N/A	N/A	d__Bacteria;p__Bacteroidota;c__Bacteroidia;o__Bacteroidales;f__Paludibacteraceae;g__Paludibacter;s__	ANI	N/A	GCA_903912795.1, s__Paludibacter sp903912795, 95.0, 79.13, 0.3; GCA_009929375.1, s__Paludibacter sp009929375, 95.0, 78.15, 0.23; GCA_903901975.1, s__Paludibacter sp903901975, 95.0, 77.93, 0.15; GCA_003250325.1, s__Paludibacter sp003250325, 95.0, 77.92, 0.15; GCA_002427615.1, s__Paludibacter sp002427615, 95.0, 77.67, 0.19; GCF_000183135.1, s__Paludibacter propionicigenes, 95.0, 77.65, 0.14; GCA_90…	71.19
ORI4bin.37	EBPR_ORI4	uncultivable	69.04	5.799	3.63458	0.706277	d__Bacteria;p__Bdellovibrionota_C;c__UBA2361;o__UBA2361;f__UBA2361;g__;s__	N/A	N/A	N/A	N/A	N/A	N/A	N/A	N/A	N/A	N/A	d__Bacteria;p__Bdellovibrionota_C;c__UBA2361;o__UBA2361;f__UBA2361;g__;s__	taxonomic classification fully defined by topology	N/A	N/A	47.31
ORI4bin.4	EBPR_ORI4	uncultivable	94.28	0.568	7.72762	0.902269	d__Bacteria;p__Planctomycetota;c__UBA1135;o__UBA2386;f__UBA2386;g__;s__	N/A	N/A	N/A	N/A	N/A	N/A	N/A	N/A	N/A	N/A	d__Bacteria;p__Planctomycetota;c__UBA1135;o__UBA2386;f__UBA2386;g__;s__	taxonomic novelty determined using RED	N/A	N/A	84.44
ORI4bin.5	EBPR_ORI4	uncultivable	93.44	2.519	14.499	N/A	d__Bacteria;p__Proteobacteria;c__Gammaproteobacteria;o__Burkholderiales;f__Rhodocyclaceae;g__Thauera;s__Thauera aminoaromatica	GCF_000310185.1	95	d__Bacteria;p__Proteobacteria;c__Gammaproteobacteria;o__Burkholderiales;f__Rhodocyclaceae;g__Thauera;s__Thauera aminoaromatica	98.91	0.89	GCF_000310185.1	95	d__Bacteria;p__Proteobacteria;c__Gammaproteobacteria;o__Burkholderiales;f__Rhodocyclaceae;g__Thauera;s__Thauera aminoaromatica	98.91	0.89	d__Bacteria;p__Proteobacteria;c__Gammaproteobacteria;o__Burkholderiales;f__Rhodocyclaceae;g__Thauera;s__	taxonomic classification defined by topology and ANI	topological placement and ANI have congruent species assignments	GCF_000310225.1, s__Thauera phenylacetica, 95.0, 92.09, 0.76; GCA_003963015.1, s__Thauera sp003963015, 95.0, 91.95, 0.78; GCA_002422685.1, s__Thauera sp002422685, 95.0, 86.81, 0.64; GCA_003446655.1, s__Thauera sp003446655, 95.0, 86.14, 0.6; GCF_001922305.1, s__Thauera chlorobenzoica, 95.0, 84.51, 0.61; GCF_001051995.2, s__Thauera humireducens, 95.0, 84.45, 0.68; GCF_002245655.1, s__Thauera propio…	79.23
ORI4bin.6	EBPR_ORI4	uncultivable	66.44	1.485	4.24101	0.93849	d__Bacteria;p__Bacteroidota;c__Bacteroidia;o__Chitinophagales;f__Saprospiraceae;g__M3007;s__	N/A	N/A	N/A	N/A	N/A	GCA_011331955.1	95	d__Bacteria;p__Bacteroidota;c__Bacteroidia;o__Chitinophagales;f__Saprospiraceae;g__M3007;s__M3007 sp011331955	76.67	0.14	d__Bacteria;p__Bacteroidota;c__Bacteroidia;o__Chitinophagales;f__Saprospiraceae;g__M3007;s__	taxonomic classification defined by topology and ANI	N/A	GCA_903933805.1, s__M3007 sp903933805, 95.0, 76.47, 0.05; GCA_011368025.1, s__M3007 sp011368025, 95.0, 76.47, 0.02; GCA_903905445.1, s__M3007 sp903905445, 95.0, 76.2, 0.09; GCA_903925535.1, s__M3007 sp903925535, 95.0, 76.11, 0.05; GCA_006226345.1, s__M3007 sp006226345, 95.0, 76.1, 0.06; GCA_903836265.1, s__M3007 sp903836265, 95.0, 75.98, 0.06; GCA_013298845.1, s__M3007 sp013298845, 95.0, 75.91, 0…	56.76
ORI4bin.7	EBPR_ORI4	uncultivable	93.35	1.362	6.89594	0.985374	d__Bacteria;p__Proteobacteria;c__Gammaproteobacteria;o__Burkholderiales;f__Nitrosomonadaceae;g__Nitrosomonas;s__	N/A	N/A	N/A	N/A	N/A	GCA_002083395.1	95	d__Bacteria;p__Proteobacteria;c__Gammaproteobacteria;o__Burkholderiales;f__Nitrosomonadaceae;g__Nitrosomonas;s__Nitrosomonas sp002083395	85.8	0.87	d__Bacteria;p__Proteobacteria;c__Gammaproteobacteria;o__Burkholderiales;f__Nitrosomonadaceae;g__Nitrosomonas;s__	taxonomic classification defined by topology and ANI	N/A	GCF_900106555.1, s__Nitrosomonas oligotropha_A, 95.0, 79.25, 0.45; GCA_002083595.1, s__Nitrosomonas sp002083595, 95.0, 79.06, 0.43; GCF_009833085.1, s__Nitrosomonas oligotropha, 95.0, 78.95, 0.44; GCF_004345375.1, s__Nitrosomonas sp004345375, 95.0, 78.91, 0.45; GCF_900103035.1, s__Nitrosomonas mobilis, 95.0, 78.3, 0.04; GCA_002435335.1, s__Nitrosomonas sp002435335, 95.0, 77.76, 0.23; GCA_90282605…	82.55
ORI4bin.8	EBPR_ORI4	uncultivable	51.71	2.203	4.05672	0.970391	d__Bacteria;p__Proteobacteria;c__Alphaproteobacteria;o__Caulobacterales;f__Hyphomonadaceae;g__Terricaulis;s__	N/A	N/A	N/A	N/A	N/A	N/A	N/A	N/A	N/A	N/A	d__Bacteria;p__Proteobacteria;c__Alphaproteobacteria;o__Caulobacterales;f__Hyphomonadaceae;g__Terricaulis;s__	ANI	N/A	GCA_001464425.1, s__Terricaulis sp001464425, 95.0, 79.75, 0.61; GCA_902826145.1, s__Terricaulis sp902826145, 95.0, 79.59, 0.55; GCF_009792355.1, s__Terricaulis silvestris, 95.0, 79.58, 0.55; GCF_004634425.1, s__Terricaulis sp004634425, 95.0, 79.48, 0.6; GCA_900696695.1, s__Terricaulis sp900696695, 95.0, 79.41, 0.58; GCF_001679665.1, s__Terricaulis sp001679665, 95.0, 79.4, 0.55; GCA_003242075.1, s…	47.75
ORI4bin.9	EBPR_ORI4	uncultivable	97.75	2.247	205.724	0.788158	d__Bacteria;p__Elusimicrobiota;c__Elusimicrobia;o__F11;f__FEN-1173;g__;s__	N/A	N/A	N/A	N/A	N/A	GCA_003158755.1	95	d__Bacteria;p__Elusimicrobiota;c__Elusimicrobia;o__F11;f__FEN-1173;g__FEN-1173;s__FEN-1173 sp003158755	75.32	0.03	d__Bacteria;p__Elusimicrobiota;c__Elusimicrobia;o__F11;f__;g__;s__	taxonomic classification defined by topology and ANI	N/A	N/A	89.8
s431bin.1	EBPR_s431	cultivable	99.89	0.568	296.544	0.97069	d__Bacteria;p__Proteobacteria;c__Alphaproteobacteria;o__Caulobacterales;f__Caulobacteraceae;g__Caulobacter;s__	N/A	N/A	N/A	N/A	N/A	GCF_002749615.1	95	d__Bacteria;p__Proteobacteria;c__Alphaproteobacteria;o__Caulobacterales;f__Caulobacteraceae;g__Caulobacter;s__Caulobacter mirabilis	84.26	0.73	d__Bacteria;p__Proteobacteria;c__Alphaproteobacteria;o__Caulobacterales;f__Caulobacteraceae;g__Caulobacter;s__	taxonomic classification defined by topology and ANI	N/A	GCA_903858185.1, s__Caulobacter sp903858185, 95.0, 82.74, 0.7; GCF_900114015.1, s__Caulobacter sp900114015, 95.0, 80.72, 0.56; GCF_001426905.1, s__Caulobacter sp001426905, 95.0, 80.71, 0.59; GCF_000712075.1, s__Caulobacter sp000712075, 95.0, 80.67, 0.59; GCF_009905535.1, s__Caulobacter sp009905535, 95.0, 80.65, 0.6; GCF_007828975.1, s__Caulobacter henricii_D, 95.0, 80.64, 0.55; GCF_000281955.1, s…	98.13
s431bin.10	EBPR_s431	cultivable	82.75	1.724	19.8387	N/A	d__Bacteria;p__Proteobacteria;c__Alphaproteobacteria;o__Rhodobacterales;f__Rhodobacteraceae;g__UBA1943;s__UBA1943 sp013328815	GCF_013328815.1	95	d__Bacteria;p__Proteobacteria;c__Alphaproteobacteria;o__Rhodobacterales;f__Rhodobacteraceae;g__UBA1943;s__UBA1943 sp013328815	98.14	0.94	GCF_013328815.1	95	d__Bacteria;p__Proteobacteria;c__Alphaproteobacteria;o__Rhodobacterales;f__Rhodobacteraceae;g__UBA1943;s__UBA1943 sp013328815	98.14	0.94	d__Bacteria;p__Proteobacteria;c__Alphaproteobacteria;o__Rhodobacterales;f__Rhodobacteraceae;g__UBA1943;s__	taxonomic classification defined by topology and ANI	topological placement and ANI have congruent species assignments	GCA_002336845.1, s__UBA1943 sp002336845, 95.0, 81.54, 0.65	79.13
s431bin.11	EBPR_s431	cultivable	95.46	3.513	13.1358	0.972126	d__Bacteria;p__Verrucomicrobiota;c__Verrucomicrobiae;o__Opitutales;f__Opitutaceae;g__Lacunisphaera;s__	N/A	N/A	N/A	N/A	N/A	GCF_900104925.1	95	d__Bacteria;p__Verrucomicrobiota;c__Verrucomicrobiae;o__Opitutales;f__Opitutaceae;g__Lacunisphaera;s__Lacunisphaera sp900104925	85.81	0.58	d__Bacteria;p__Verrucomicrobiota;c__Verrucomicrobiae;o__Opitutales;f__Opitutaceae;g__Lacunisphaera;s__	taxonomic classification defined by topology and ANI	N/A	GCA_001464505.1, s__Lacunisphaera sp001464505, 95.0, 83.33, 0.65; GCF_001746835.1, s__Lacunisphaera limnophila, 95.0, 81.98, 0.45; GCF_004118375.1, s__Lacunisphaera lentus, 95.0, 81.69, 0.47; GCA_009695095.1, s__Lacunisphaera sp009695095, 95.0, 81.66, 0.6; GCA_903898675.1, s__Lacunisphaera sp903898675, 95.0, 81.6, 0.5; GCA_002304425.1, s__Lacunisphaera sp002304425, 95.0, 77.95, 0.2; GCA_903906135…	82.05
s431bin.12	EBPR_s431	cultivable	84.61	1.44	19.6932	0.988798	d__Bacteria;p__Proteobacteria;c__Gammaproteobacteria;o__Burkholderiales;f__Rhodocyclaceae;g__Zoogloea;s__	N/A	N/A	N/A	N/A	N/A	GCF_009469605.1	95	d__Bacteria;p__Proteobacteria;c__Gammaproteobacteria;o__Burkholderiales;f__Rhodocyclaceae;g__Zoogloea;s__Zoogloea sp009469605	91.54	0.88	d__Bacteria;p__Proteobacteria;c__Gammaproteobacteria;o__Burkholderiales;f__Rhodocyclaceae;g__Zoogloea;s__	taxonomic classification defined by topology and ANI	N/A	GCF_006539865.1, s__Zoogloea ramigera, 95.0, 84.2, 0.63; GCA_009026175.1, s__Zoogloea sp009026175, 95.0, 82.97, 0.56; GCF_012927165.1, s__Zoogloea sp012927165, 95.0, 82.84, 0.63; GCF_008107625.1, s__Zoogloea oleivorans, 95.0, 82.75, 0.61; GCF_002028455.1, s__Zoogloea sp002028455, 95.0, 82.67, 0.62; GCA_008011925.1, s__Zoogloea sp008011925, 95.0, 81.56, 0.54	63.83
s431bin.13	EBPR_s431	cultivable	83.88	0	66.2647	0.990509	d__Bacteria;p__Proteobacteria;c__Gammaproteobacteria;o__Burkholderiales;f__Rhodocyclaceae;g__Azonexus;s__	N/A	N/A	N/A	N/A	N/A	GCA_004379165.1	95	d__Bacteria;p__Proteobacteria;c__Gammaproteobacteria;o__Burkholderiales;f__Rhodocyclaceae;g__Azonexus;s__Azonexus sp004379165	91.93	0.75	d__Bacteria;p__Proteobacteria;c__Gammaproteobacteria;o__Burkholderiales;f__Rhodocyclaceae;g__Azonexus;s__	taxonomic classification defined by topology and ANI	N/A	GCF_000519045.1, s__Azonexus agitatus, 95.0, 82.58, 0.54; GCF_009469615.1, s__Azonexus sp009469615, 95.0, 82.28, 0.53; GCF_009469585.1, s__Azonexus sp009469585, 95.0, 82.24, 0.54; GCA_002470165.1, s__Azonexus sp002470165, 95.0, 82.19, 0.55; GCA_002425245.1, s__Azonexus sp002425245, 95.0, 82.14, 0.44; GCF_000429605.1, s__Azonexus hydrophilus, 95.0, 82.09, 0.49; GCF_008711155.1, s__Azonexus sp00871…	90.29
s431bin.14	EBPR_s431	cultivable	100	0.436	75.8603	0.978029	d__Bacteria;p__Proteobacteria;c__Alphaproteobacteria;o__CACIAM-22H2;f__CACIAM-22H2;g__Tagaea;s__	N/A	N/A	N/A	N/A	N/A	GCA_014444615.1	95	d__Bacteria;p__Proteobacteria;c__Alphaproteobacteria;o__CACIAM-22H2;f__CACIAM-22H2;g__Tagaea;s__Tagaea sp014444615	91.78	0.85	d__Bacteria;p__Proteobacteria;c__Alphaproteobacteria;o__CACIAM-22H2;f__CACIAM-22H2;g__;s__	taxonomic classification defined by topology and ANI	N/A	N/A	98.27
s431bin.15	EBPR_s431	cultivable	78.1	1.961	9.68244	0.977071	d__Bacteria;p__Proteobacteria;c__Gammaproteobacteria;o__Burkholderiales;f__Rhodocyclaceae;g__Zoogloea;s__	N/A	N/A	N/A	N/A	N/A	GCF_009469605.1	95	d__Bacteria;p__Proteobacteria;c__Gammaproteobacteria;o__Burkholderiales;f__Rhodocyclaceae;g__Zoogloea;s__Zoogloea sp009469605	85.2	0.73	d__Bacteria;p__Proteobacteria;c__Gammaproteobacteria;o__Burkholderiales;f__Rhodocyclaceae;g__Zoogloea;s__	taxonomic classification defined by topology and ANI	N/A	GCF_006539865.1, s__Zoogloea ramigera, 95.0, 84.49, 0.66; GCF_012927165.1, s__Zoogloea sp012927165, 95.0, 83.01, 0.7; GCA_009026175.1, s__Zoogloea sp009026175, 95.0, 82.97, 0.63; GCF_008107625.1, s__Zoogloea oleivorans, 95.0, 82.94, 0.65; GCF_002028455.1, s__Zoogloea sp002028455, 95.0, 82.71, 0.69; GCA_008011925.1, s__Zoogloea sp008011925, 95.0, 81.02, 0.38	54.99
s431bin.16	EBPR_s431	cultivable	99.57	0.632	15.2708	N/A	d__Bacteria;p__Proteobacteria;c__Alphaproteobacteria;o__Rhizobiales;f__Stappiaceae;g__Pannonibacter;s__Pannonibacter indicus	GCF_001418225.1	95	d__Bacteria;p__Proteobacteria;c__Alphaproteobacteria;o__Rhizobiales;f__Stappiaceae;g__Pannonibacter;s__Pannonibacter indicus	95.7	0.93	GCF_000382365.1	95	d__Bacteria;p__Proteobacteria;c__Alphaproteobacteria;o__Rhizobiales;f__Stappiaceae;g__Pannonibacter;s__Pannonibacter phragmitetus	94.23	0.88	d__Bacteria;p__Proteobacteria;c__Alphaproteobacteria;o__Rhizobiales;f__Stappiaceae;g__Pannonibacter;s__	ANI	topological placement and ANI have incongruent species assignments	GCF_009915765.1, s__Pannonibacter sp009915765, 95.0, 81.42, 0.56; GCF_003012935.1, s__Pannonibacter carbonis, 95.0, 81.22, 0.53	96.66
s431bin.17	EBPR_s431	cultivable	53.49	0.727	23.2851	0.941047	d__Bacteria;p__Proteobacteria;c__Alphaproteobacteria;o__Dongiales;f__Dongiaceae;g__Dongia;s__	N/A	N/A	N/A	N/A	N/A	GCF_004363235.1	95	d__Bacteria;p__Proteobacteria;c__Alphaproteobacteria;o__Dongiales;f__Dongiaceae;g__Dongia;s__Dongia mobilis	80.41	0.51	d__Bacteria;p__Proteobacteria;c__Alphaproteobacteria;o__Dongiales;f__Dongiaceae;g__Dongia;s__	taxonomic classification defined by topology and ANI	N/A	GCF_000620685.1, s__Dongia sp000620685, 95.0, 77.66, 0.3	60.95
s431bin.18	EBPR_s431	cultivable	84.41	3.511	6.81318	0.947292	d__Bacteria;p__Proteobacteria;c__Alphaproteobacteria;o__Caulobacterales;f__Hyphomonadaceae;g__UBA1942;s__	N/A	N/A	N/A	N/A	N/A	N/A	N/A	N/A	N/A	N/A	d__Bacteria;p__Proteobacteria;c__Alphaproteobacteria;o__Caulobacterales;f__Hyphomonadaceae;g__UBA1942;s__	ANI	N/A	GCA_002337085.1, s__UBA1942 sp002337085, 95.0, 76.93, 0.2; GCA_002336965.1, s__UBA1942 sp002336965, 95.0, 76.87, 0.16; GCA_009773395.1, s__UBA1942 sp009773395, 95.0, 76.4, 0.12	59.86
s431bin.19	EBPR_s431	cultivable	99.84	0.196	70.7536	N/A	d__Bacteria;p__Proteobacteria;c__Gammaproteobacteria;o__Burkholderiales;f__Burkholderiaceae;g__Comamonas;s__Comamonas acidovorans	GCF_001598795.1	95.4801	d__Bacteria;p__Proteobacteria;c__Gammaproteobacteria;o__Burkholderiales;f__Burkholderiaceae;g__Comamonas;s__Comamonas acidovorans	96.21	0.84	GCF_001598795.1	95.4801	d__Bacteria;p__Proteobacteria;c__Gammaproteobacteria;o__Burkholderiales;f__Burkholderiaceae;g__Comamonas;s__Comamonas acidovorans	96.21	0.84	d__Bacteria;p__Proteobacteria;c__Gammaproteobacteria;o__Burkholderiales;f__Burkholderiaceae;g__Comamonas;s__	taxonomic classification defined by topology and ANI	topological placement and ANI have congruent species assignments	GCF_001571325.1, s__Comamonas tsuruhatensis, 95.4801, 94.8, 0.84; GCA_014637085.1, s__Comamonas phosphati, 95.0, 84.77, 0.72; GCF_001544075.1, s__Comamonas terrae, 95.0, 84.65, 0.69; GCF_000429845.1, s__Comamonas composti, 95.0, 83.23, 0.64; GCF_000739375.1, s__Comamonas testosteroni_B, 95.0, 82.63, 0.53; GCA_009360615.1, s__Comamonas sp009360615, 95.0, 82.4, 0.54; GCF_000241525.1, s__Comamonas t…	97.56
s431bin.2	EBPR_s431	cultivable	88.34	3.787	14.7812	N/A	d__Bacteria;p__Proteobacteria;c__Gammaproteobacteria;o__Burkholderiales;f__Rhodocyclaceae;g__Thauera;s__Thauera aminoaromatica	GCF_000310185.1	95	d__Bacteria;p__Proteobacteria;c__Gammaproteobacteria;o__Burkholderiales;f__Rhodocyclaceae;g__Thauera;s__Thauera aminoaromatica	98.9	0.89	GCF_000310185.1	95	d__Bacteria;p__Proteobacteria;c__Gammaproteobacteria;o__Burkholderiales;f__Rhodocyclaceae;g__Thauera;s__Thauera aminoaromatica	98.9	0.89	d__Bacteria;p__Proteobacteria;c__Gammaproteobacteria;o__Burkholderiales;f__Rhodocyclaceae;g__Thauera;s__	taxonomic classification defined by topology and ANI	topological placement and ANI have congruent species assignments	GCA_003963015.1, s__Thauera sp003963015, 95.0, 91.68, 0.81; GCF_000310225.1, s__Thauera phenylacetica, 95.0, 91.49, 0.78; GCA_002422685.1, s__Thauera sp002422685, 95.0, 86.37, 0.67; GCA_003446655.1, s__Thauera sp003446655, 95.0, 85.75, 0.56; GCF_001922305.1, s__Thauera chlorobenzoica, 95.0, 84.21, 0.66; GCF_002245655.1, s__Thauera propionica, 95.0, 84.18, 0.67; GCF_001051995.2, s__Thauera humired…	68.31
s431bin.21	EBPR_s431	cultivable	96.12	1.179	89.4095	0.947131	d__Bacteria;p__Proteobacteria;c__Alphaproteobacteria;o__Caulobacterales;f__Hyphomonadaceae;g__UBA1942;s__	N/A	N/A	N/A	N/A	N/A	N/A	N/A	N/A	N/A	N/A	d__Bacteria;p__Proteobacteria;c__Alphaproteobacteria;o__Caulobacterales;f__Hyphomonadaceae;g__UBA1942;s__	ANI	N/A	GCA_002336965.1, s__UBA1942 sp002336965, 95.0, 77.16, 0.14; GCA_002337085.1, s__UBA1942 sp002337085, 95.0, 76.87, 0.16; GCA_009773395.1, s__UBA1942 sp009773395, 95.0, 76.69, 0.13	92.14
s431bin.22	EBPR_s431	cultivable	98.91	1.521	24.9403	0.987012	d__Bacteria;p__Proteobacteria;c__Alphaproteobacteria;o__Sphingomonadales;f__Sphingomonadaceae;g__Sphingosinicella;s__	N/A	N/A	N/A	N/A	N/A	GCF_003634215.1	95	d__Bacteria;p__Proteobacteria;c__Alphaproteobacteria;o__Sphingomonadales;f__Sphingomonadaceae;g__Sphingosinicella;s__Sphingosinicella microcystinivorans	89.8	0.74	d__Bacteria;p__Proteobacteria;c__Alphaproteobacteria;o__Sphingomonadales;f__Sphingomonadaceae;g__Sphingosinicella;s__	taxonomic classification defined by topology and ANI	N/A	GCA_013911755.1, s__Sphingosinicella sp013911755, 95.0, 89.79, 0.8; GCF_014199685.1, s__Sphingosinicella soli, 95.0, 86.75, 0.68	96.27
s431bin.23	EBPR_s431	cultivable	99.43	0.739	22.2459	N/A	d__Bacteria;p__Proteobacteria;c__Alphaproteobacteria;o__Rhizobiales;f__Rhizobiaceae;g__Agrobacterium;s__Agrobacterium salinitolerans	GCF_002008225.1	95	d__Bacteria;p__Proteobacteria;c__Alphaproteobacteria;o__Rhizobiales;f__Rhizobiaceae;g__Agrobacterium;s__Agrobacterium salinitolerans	98.48	0.89	GCF_002008225.1	95	d__Bacteria;p__Proteobacteria;c__Alphaproteobacteria;o__Rhizobiales;f__Rhizobiaceae;g__Agrobacterium;s__Agrobacterium salinitolerans	98.48	0.89	d__Bacteria;p__Proteobacteria;c__Alphaproteobacteria;o__Rhizobiales;f__Rhizobiaceae;g__Agrobacterium;s__	taxonomic classification defined by topology and ANI	topological placement and ANI have congruent species assignments	GCF_002943835.1, s__Agrobacterium deltaense, 95.0, 92.34, 0.83; GCF_001541315.1, s__Agrobacterium tumefaciens, 95.0, 90.69, 0.81; GCA_003241215.1, s__Agrobacterium fabrum_A, 95.0, 90.11, 0.83; GCF_005221325.1, s__Agrobacterium sp900012625, 95.0, 89.43, 0.79; GCF_000092025.1, s__Agrobacterium fabrum, 95.0, 89.27, 0.81; GCF_002005205.3, s__Agrobacterium rhizogenes_A, 95.0, 89.18, 0.79; GCF_90001261…	89
s431bin.24	EBPR_s431	cultivable	92.98	5.157	20.272	0.970026	d__Bacteria;p__Proteobacteria;c__Alphaproteobacteria;o__Rhizobiales;f__Devosiaceae;g__Devosia_A;s__	N/A	N/A	N/A	N/A	N/A	N/A	N/A	N/A	N/A	N/A	d__Bacteria;p__Proteobacteria;c__Alphaproteobacteria;o__Rhizobiales;f__Devosiaceae;g__Devosia_A;s__	ANI	N/A	GCA_001899085.1, s__Devosia_A sp001899085, 95.0, 81.56, 0.6; GCF_001402915.1, s__Devosia_A sp001402915, 95.0, 81.41, 0.61; GCF_001425235.1, s__Devosia_A sp001425235, 95.0, 81.38, 0.61; GCF_000970465.2, s__Devosia_A insulae, 95.0, 81.3, 0.57; GCA_903842455.1, s__Devosia_A sp903842455, 95.0, 81.04, 0.56; GCA_001899075.1, s__Devosia_A sp001899075, 95.0, 79.86, 0.46; GCA_001899065.1, s__Devosia_A sp0…	75.14
s431bin.3	EBPR_s431	cultivable	94.6	1.896	62.5443	0.964492	d__Bacteria;p__Proteobacteria;c__Alphaproteobacteria;o__Rhodobacterales;f__Rhodobacteraceae;g__UBA1943;s__	N/A	N/A	N/A	N/A	N/A	GCA_002336845.1	95	d__Bacteria;p__Proteobacteria;c__Alphaproteobacteria;o__Rhodobacterales;f__Rhodobacteraceae;g__UBA1943;s__UBA1943 sp002336845	81.59	0.65	d__Bacteria;p__Proteobacteria;c__Alphaproteobacteria;o__Rhodobacterales;f__Rhodobacteraceae;g__UBA1943;s__	taxonomic classification defined by topology and ANI	N/A	GCF_013328815.1, s__UBA1943 sp013328815, 95.0, 83.68, 0.78	89.44
s431bin.4	EBPR_s431	cultivable	51.96	1.681	9.08969	0.999994	d__Bacteria;p__Firmicutes;c__Bacilli;o__Exiguobacterales;f__Exiguobacteraceae;g__Exiguobacterium_A;s__	N/A	N/A	N/A	N/A	N/A	GCF_000702605.1	95	d__Bacteria;p__Firmicutes;c__Bacilli;o__Exiguobacterales;f__Exiguobacteraceae;g__Exiguobacterium_A;s__Exiguobacterium_A acetylicum	94.85	0.3	d__Bacteria;p__Firmicutes;c__Bacilli;o__Exiguobacterales;f__Exiguobacteraceae;g__Exiguobacterium_A;s__	taxonomic classification defined by topology and ANI	N/A	GCF_001939065.1, s__Exiguobacterium_A indicum, 95.0, 91.47, 0.28; GCF_001275385.1, s__Exiguobacterium_A sp001275385, 95.0, 89.09, 0.26; GCF_001423965.1, s__Exiguobacterium_A sp001423965, 95.0, 89.01, 0.24; GCF_003339585.1, s__Exiguobacterium_A sp003339585, 95.0, 82.31, 0.19; GCF_014524545.1, s__Exiguobacterium_A sp004339505, 95.0, 81.61, 0.22; GCF_902363455.1, s__Exiguobacterium_A sp902363455, 95…	46.62
s431bin.7	EBPR_s431	cultivable	92.12	2.254	10.9196	N/A	d__Bacteria;p__Proteobacteria;c__Alphaproteobacteria;o__Rhizobiales;f__Devosiaceae;g__Devosia_A;s__Devosia_A sp001899065	GCA_001899065.1	95	d__Bacteria;p__Proteobacteria;c__Alphaproteobacteria;o__Rhizobiales;f__Devosiaceae;g__Devosia_A;s__Devosia_A sp001899065	98.01	0.85	GCA_001899065.1	95	d__Bacteria;p__Proteobacteria;c__Alphaproteobacteria;o__Rhizobiales;f__Devosiaceae;g__Devosia_A;s__Devosia_A sp001899065	98.01	0.85	d__Bacteria;p__Proteobacteria;c__Alphaproteobacteria;o__Rhizobiales;f__Devosiaceae;g__Devosia_A;s__	taxonomic classification defined by topology and ANI	topological placement and ANI have congruent species assignments	GCA_004144345.1, s__Devosia_A sp004144345, 95.0, 82.78, 0.61; GCA_001899075.1, s__Devosia_A sp001899075, 95.0, 81.87, 0.54; GCA_001899085.1, s__Devosia_A sp001899085, 95.0, 79.62, 0.49; GCF_001402915.1, s__Devosia_A sp001402915, 95.0, 79.57, 0.46; GCF_000970465.2, s__Devosia_A insulae, 95.0, 79.48, 0.43; GCF_001425235.1, s__Devosia_A sp001425235, 95.0, 79.4, 0.48; GCA_903842455.1, s__Devosia_A sp…	72.9
s431bin.8	EBPR_s431	cultivable	96.49	2.158	28.4412	0.963227	d__Bacteria;p__Actinobacteriota;c__Actinomycetia;o__Propionibacteriales;f__Propionibacteriaceae;g__Propionicimonas;s__	N/A	N/A	N/A	N/A	N/A	N/A	N/A	N/A	N/A	N/A	d__Bacteria;p__Actinobacteriota;c__Actinomycetia;o__Propionibacteriales;f__Propionibacteriaceae;g__Propionicimonas;s__	ANI	N/A	GCA_002843035.1, s__Propionicimonas sp002843035, 95.0, 82.64, 0.63; GCA_002441465.1, s__Propionicimonas sp002441465, 95.0, 81.47, 0.41; GCF_002563675.1, s__Propionicimonas paludicola, 95.0, 80.28, 0.46; GCA_001603275.1, s__Propionicimonas sp001603275, 95.0, 80.14, 0.44; GCA_002841335.1, s__Propionicimonas sp002841335, 95.0, 79.59, 0.39; GCA_013791955.1, s__Propionicimonas sp013791955, 95.0, 78.68…	88.88
s431bin.9	EBPR_s431	cultivable	57.23	0	19.9565	0.978183	d__Bacteria;p__Bacteroidota;c__Bacteroidia;o__Flavobacteriales;f__Flavobacteriaceae;g__Flavobacterium;s__	N/A	N/A	N/A	N/A	N/A	GCF_002251835.1	95	d__Bacteria;p__Bacteroidota;c__Bacteroidia;o__Flavobacteriales;f__Flavobacteriaceae;g__Flavobacterium;s__Flavobacterium cyanobacteriorum	79.08	0.29	d__Bacteria;p__Bacteroidota;c__Bacteroidia;o__Flavobacteriales;f__Flavobacteriaceae;g__Flavobacterium;s__	taxonomic classification defined by topology and ANI	N/A	GCA_002714575.1, s__Flavobacterium sp002714575, 95.0, 79.47, 0.29; GCF_009848495.1, s__Flavobacterium sp009848495, 95.0, 78.84, 0.26; GCF_006491645.1, s__Flavobacterium sp006491645, 95.0, 78.74, 0.04; GCF_003096035.1, s__Flavobacterium album, 95.0, 78.59, 0.3; GCF_009363055.1, s__Flavobacterium haoranii, 95.0, 78.57, 0.04; GCA_003246205.1, s__Flavobacterium haoranii_A, 95.0, 78.56, 0.03; GCF_9001…	59.14
s472bin.1	EBPR_s472	cultivable	98.8	0.901	15.0997	0.970915	d__Bacteria;p__Proteobacteria;c__Alphaproteobacteria;o__Rhizobiales;f__Devosiaceae;g__Devosia_A;s__	N/A	N/A	N/A	N/A	N/A	N/A	N/A	N/A	N/A	N/A	d__Bacteria;p__Proteobacteria;c__Alphaproteobacteria;o__Rhizobiales;f__Devosiaceae;g__Devosia_A;s__	ANI	N/A	GCF_001402915.1, s__Devosia_A sp001402915, 95.0, 81.17, 0.53; GCA_001899085.1, s__Devosia_A sp001899085, 95.0, 81.15, 0.53; GCF_001425235.1, s__Devosia_A sp001425235, 95.0, 81.08, 0.55; GCF_000970465.2, s__Devosia_A insulae, 95.0, 81.05, 0.51; GCA_903842455.1, s__Devosia_A sp903842455, 95.0, 80.81, 0.54; GCA_001899075.1, s__Devosia_A sp001899075, 95.0, 79.6, 0.44; GCA_001899065.1, s__Devosia_A sp…	97.24
s472bin.13	EBPR_s472	cultivable	62.91	0	6.9846	0.921662	d__Bacteria;p__Proteobacteria;c__Alphaproteobacteria;o__Rhodospirillales;f__Rhodospirillaceae;g__GCA-2737725;s__	N/A	N/A	N/A	N/A	N/A	N/A	N/A	N/A	N/A	N/A	d__Bacteria;p__Proteobacteria;c__Alphaproteobacteria;o__Rhodospirillales;f__Rhodospirillaceae;g__;s__	taxonomic novelty determined using RED	N/A	N/A	49.55
s472bin.14	EBPR_s472	cultivable	99.42	0.467	131.043	0.979592	d__Bacteria;p__Proteobacteria;c__Gammaproteobacteria;o__Burkholderiales;f__Burkholderiaceae;g__Inhella;s__	N/A	N/A	N/A	N/A	N/A	GCF_005952805.1	95	d__Bacteria;p__Proteobacteria;c__Gammaproteobacteria;o__Burkholderiales;f__Burkholderiaceae;g__Inhella;s__Inhella inkyongensis	80.43	0.48	d__Bacteria;p__Proteobacteria;c__Gammaproteobacteria;o__Burkholderiales;f__Burkholderiaceae;g__Inhella;s__	taxonomic classification defined by topology and ANI	N/A	GCF_004004565.1, s__Inhella crocodyli, 95.0, 80.72, 0.58	97.62
s472bin.15	EBPR_s472	cultivable	93.91	4.492	11.6931	0.875953	d__Bacteria;p__Proteobacteria;c__Alphaproteobacteria;o__CACIAM-22H2;f__CACIAM-22H2;g__Tagaea;s__	N/A	N/A	N/A	N/A	N/A	GCA_014444615.1	95	d__Bacteria;p__Proteobacteria;c__Alphaproteobacteria;o__CACIAM-22H2;f__CACIAM-22H2;g__Tagaea;s__Tagaea sp014444615	78.78	0.42	d__Bacteria;p__Proteobacteria;c__Alphaproteobacteria;o__CACIAM-22H2;f__CACIAM-22H2;g__;s__	taxonomic classification defined by topology and ANI	N/A	N/A	87.97
s472bin.16	EBPR_s472	cultivable	91.04	3.541	6.95286	0.951192	d__Bacteria;p__Bacteroidota;c__Bacteroidia;o__Cytophagales;f__Cyclobacteriaceae;g__ELB16-189;s__	N/A	N/A	N/A	N/A	N/A	N/A	N/A	N/A	N/A	N/A	d__Bacteria;p__Bacteroidota;c__Bacteroidia;o__Cytophagales;f__Cyclobacteriaceae;g__ELB16-189;s__	ANI	N/A	GCA_003537495.1, s__ELB16-189 sp003537495, 95.0, 79.05, 0.21; GCA_002352225.1, s__ELB16-189 sp002352225, 95.0, 78.2, 0.28; GCA_013414665.1, s__ELB16-189 sp013414665, 95.0, 78.09, 0.26; GCA_001567185.1, s__ELB16-189 sp001567185, 95.0, 77.99, 0.23; GCA_013285945.1, s__ELB16-189 sp013285945, 95.0, 77.34, 0.03; GCA_013141055.1, s__ELB16-189 sp013141055, 95.0, 77.01, 0.04; GCA_013140555.1, s__ELB16-18…	71.43
s472bin.17	EBPR_s472	cultivable	75.86	3.448	23.2196	N/A	d__Bacteria;p__Proteobacteria;c__Gammaproteobacteria;o__Xanthomonadales;f__Xanthomonadaceae;g__Stenotrophomonas;s__Stenotrophomonas lactitubi	GCF_002803515.1	95	d__Bacteria;p__Proteobacteria;c__Gammaproteobacteria;o__Xanthomonadales;f__Xanthomonadaceae;g__Stenotrophomonas;s__Stenotrophomonas lactitubi	97	0.86	GCF_002803515.1	95	d__Bacteria;p__Proteobacteria;c__Gammaproteobacteria;o__Xanthomonadales;f__Xanthomonadaceae;g__Stenotrophomonas;s__Stenotrophomonas lactitubi	97	0.86	d__Bacteria;p__Proteobacteria;c__Gammaproteobacteria;o__Xanthomonadales;f__Xanthomonadaceae;g__Stenotrophomonas;s__	taxonomic classification defined by topology and ANI	topological placement and ANI have congruent species assignments	GCF_002750975.1, s__Stenotrophomonas indicatrix, 95.0, 93.65, 0.84; GCF_013364355.1, s__Stenotrophomonas sp013364355, 95.0, 93.43, 0.82; GCF_006970445.1, s__Stenotrophomonas maltophilia_AU, 95.0, 88.38, 0.79; GCF_004920835.1, s__Stenotrophomonas maltophilia_AQ, 95.0, 88.27, 0.79; GCF_000020665.1, s__Stenotrophomonas maltophilia_L, 95.0, 88.25, 0.78; GCF_002192255.1, s__Stenotrophomonas sp00219225…	63.23
s472bin.18	EBPR_s472	cultivable	99.7	0.681	515.056	0.988638	d__Bacteria;p__Proteobacteria;c__Gammaproteobacteria;o__Burkholderiales;f__Rhodocyclaceae;g__Zoogloea;s__	N/A	N/A	N/A	N/A	N/A	GCA_008011925.1	95	d__Bacteria;p__Proteobacteria;c__Gammaproteobacteria;o__Burkholderiales;f__Rhodocyclaceae;g__Zoogloea;s__Zoogloea sp008011925	87.51	0.82	d__Bacteria;p__Proteobacteria;c__Gammaproteobacteria;o__Burkholderiales;f__Rhodocyclaceae;g__Zoogloea;s__	taxonomic classification defined by topology and ANI	N/A	GCF_012927165.1, s__Zoogloea sp012927165, 95.0, 83.16, 0.64; GCA_009026175.1, s__Zoogloea sp009026175, 95.0, 83.12, 0.59; GCF_009469605.1, s__Zoogloea sp009469605, 95.0, 82.53, 0.59; GCF_008107625.1, s__Zoogloea oleivorans, 95.0, 82.3, 0.59; GCF_006539865.1, s__Zoogloea ramigera, 95.0, 82.16, 0.54; GCF_002028455.1, s__Zoogloea sp002028455, 95.0, 81.95, 0.54	97.02
s472bin.19	EBPR_s472	cultivable	100	0.518	18.6506	0.914226	d__Bacteria;p__Proteobacteria;c__Gammaproteobacteria;o__Burkholderiales;f__Rhodocyclaceae;g__UBA2357;s__	N/A	N/A	N/A	N/A	N/A	N/A	N/A	N/A	N/A	N/A	d__Bacteria;p__Proteobacteria;c__Gammaproteobacteria;o__Burkholderiales;f__Rhodocyclaceae;g__;s__	taxonomic novelty determined using RED	N/A	N/A	97.7
s472bin.20	EBPR_s472	cultivable	88.86	0	34.4388	0.934444	d__Bacteria;p__Proteobacteria;c__Alphaproteobacteria;o__Rhizobiales;f__Devosiaceae;g__Devosia_A;s__	N/A	N/A	N/A	N/A	N/A	N/A	N/A	N/A	N/A	N/A	d__Bacteria;p__Proteobacteria;c__Alphaproteobacteria;o__Rhizobiales;f__Devosiaceae;g__;s__	taxonomic novelty determined using RED	N/A	N/A	91.68
s472bin.21	EBPR_s472	cultivable	99.76	0.236	270.63	N/A	d__Bacteria;p__Proteobacteria;c__Gammaproteobacteria;o__Burkholderiales;f__Rhodocyclaceae;g__Azonexus;s__Azonexus sp009469585	GCF_009469585.1	95	d__Bacteria;p__Proteobacteria;c__Gammaproteobacteria;o__Burkholderiales;f__Rhodocyclaceae;g__Azonexus;s__Azonexus sp009469585	99.43	0.93	GCF_009469585.1	95	d__Bacteria;p__Proteobacteria;c__Gammaproteobacteria;o__Burkholderiales;f__Rhodocyclaceae;g__Azonexus;s__Azonexus sp009469585	99.43	0.93	d__Bacteria;p__Proteobacteria;c__Gammaproteobacteria;o__Burkholderiales;f__Rhodocyclaceae;g__Azonexus;s__	taxonomic classification defined by topology and ANI	topological placement and ANI have congruent species assignments	GCA_903922075.1, s__Azonexus sp903922075, 95.0, 84.54, 0.68; GCF_009469615.1, s__Azonexus sp009469615, 95.0, 84.26, 0.65; GCF_003634965.1, s__Azonexus fungiphilus, 95.0, 83.65, 0.6; GCA_002440665.1, s__Azonexus sp002440665, 95.0, 83.51, 0.59; GCA_002840785.1, s__Azonexus sp002840785, 95.0, 83.47, 0.63; GCF_001551835.1, s__Azonexus denitrificans, 95.0, 83.44, 0.65; GCF_000519045.1, s__Azonexus agi…	97.18
s472bin.22	EBPR_s472	cultivable	95.33	0.546	67.6689	0.797019	d__Bacteria;p__Bacteroidota;c__JABWAT01;o__JABWAT01;f__JABWAT01;g__;s__	N/A	N/A	N/A	N/A	N/A	GCA_013360915.1	95	d__Bacteria;p__Bacteroidota;c__JABWAT01;o__JABWAT01;f__JABWAT01;g__JABWAT01;s__JABWAT01 sp013360915	76.66	0.09	d__Bacteria;p__Bacteroidota;c__;o__;f__;g__;s__	taxonomic classification defined by topology and ANI	N/A	N/A	98.01
s472bin.23	EBPR_s472	cultivable	99.34	1.057	42.8791	0.907496	d__Bacteria;p__Proteobacteria;c__Alphaproteobacteria;o__Sphingomonadales;f__Sphingomonadaceae;g__;s__	N/A	N/A	N/A	N/A	N/A	N/A	N/A	N/A	N/A	N/A	d__Bacteria;p__Proteobacteria;c__Alphaproteobacteria;o__Sphingomonadales;f__Sphingomonadaceae;g__;s__	taxonomic novelty determined using RED	N/A	N/A	95.83
s472bin.24	EBPR_s472	cultivable	86.53	7.653	31.6541	0.947303	d__Bacteria;p__Proteobacteria;c__Alphaproteobacteria;o__Caulobacterales;f__Hyphomonadaceae;g__UBA1942;s__	N/A	N/A	N/A	N/A	N/A	N/A	N/A	N/A	N/A	N/A	d__Bacteria;p__Proteobacteria;c__Alphaproteobacteria;o__Caulobacterales;f__Hyphomonadaceae;g__UBA1942;s__	ANI	N/A	GCA_002337085.1, s__UBA1942 sp002337085, 95.0, 77.64, 0.14; GCA_009773395.1, s__UBA1942 sp009773395, 95.0, 76.76, 0.12; GCA_002336965.1, s__UBA1942 sp002336965, 95.0, 76.76, 0.15	81.08
s472bin.4	EBPR_s472	cultivable	99.63	0.303	84.6886	0.954523	d__Bacteria;p__Proteobacteria;c__Alphaproteobacteria;o__Rhodobacterales;f__Rhodobacteraceae;g__Fuscovulum;s__	N/A	N/A	N/A	N/A	N/A	GCF_003034965.1	95	d__Bacteria;p__Proteobacteria;c__Alphaproteobacteria;o__Rhodobacterales;f__Rhodobacteraceae;g__Fuscovulum;s__Fuscovulum blasticum	81.78	0.67	d__Bacteria;p__Proteobacteria;c__Alphaproteobacteria;o__Rhodobacterales;f__Rhodobacteraceae;g__;s__	taxonomic classification defined by topology and ANI	N/A	N/A	97.78
s472bin.5	EBPR_s472	cultivable	97.02	0.738	10.8843	0.924776	d__Bacteria;p__Bacteroidota;c__Bacteroidia;o__Chitinophagales;f__Chitinophagaceae;g__SpSt-398;s__	N/A	N/A	N/A	N/A	N/A	GCA_011331725.1	95	d__Bacteria;p__Bacteroidota;c__Bacteroidia;o__Chitinophagales;f__Chitinophagaceae;g__SpSt-398;s__SpSt-398 sp011331725	76.2	0.09	d__Bacteria;p__Bacteroidota;c__Bacteroidia;o__Chitinophagales;f__Chitinophagaceae;g__;s__	taxonomic classification defined by topology and ANI	N/A	N/A	94.98
s472bin.6	EBPR_s472	cultivable	98.38	1.313	45.4922	0.883978	d__Bacteria;p__Myxococcota;c__Polyangia;o__Haliangiales;f__Haliangiaceae;g__;s__	N/A	N/A	N/A	N/A	N/A	N/A	N/A	N/A	N/A	N/A	d__Bacteria;p__Myxococcota;c__Polyangia;o__Haliangiales;f__Haliangiaceae;g__;s__	taxonomic novelty determined using RED	N/A	N/A	93.49
s472bin.9	EBPR_s472	cultivable	71.13	4.509	30.5302	0.972744	d__Bacteria;p__Verrucomicrobiota;c__Verrucomicrobiae;o__Opitutales;f__Opitutaceae;g__Lacunisphaera;s__	N/A	N/A	N/A	N/A	N/A	GCF_900104925.1	95	d__Bacteria;p__Verrucomicrobiota;c__Verrucomicrobiae;o__Opitutales;f__Opitutaceae;g__Lacunisphaera;s__Lacunisphaera sp900104925	84.57	0.59	d__Bacteria;p__Verrucomicrobiota;c__Verrucomicrobiae;o__Opitutales;f__Opitutaceae;g__Lacunisphaera;s__	taxonomic classification defined by topology and ANI	N/A	GCA_001464505.1, s__Lacunisphaera sp001464505, 95.0, 82.48, 0.44; GCF_001746835.1, s__Lacunisphaera limnophila, 95.0, 81.4, 0.48; GCF_004118375.1, s__Lacunisphaera lentus, 95.0, 81.06, 0.49; GCA_009695095.1, s__Lacunisphaera sp009695095, 95.0, 80.72, 0.31; GCA_903898675.1, s__Lacunisphaera sp903898675, 95.0, 80.58, 0.41; GCA_002304425.1, s__Lacunisphaera sp002304425, 95.0, 77.26, 0.09; GCA_005787…	51.24
SHASGE1bin.1	SH_SHASGE1	cultivable	98.13	0.584	16.5436	0.990275	d__Bacteria;p__Proteobacteria;c__Gammaproteobacteria;o__Burkholderiales;f__Burkholderiaceae;g__WAJ17;s__	N/A	N/A	N/A	N/A	N/A	GCF_014174515.1	95	d__Bacteria;p__Proteobacteria;c__Gammaproteobacteria;o__Burkholderiales;f__Burkholderiaceae;g__WAJ17;s__WAJ17 sp014174515	91.8	0.85	d__Bacteria;p__Proteobacteria;c__Gammaproteobacteria;o__Burkholderiales;f__Burkholderiaceae;g__;s__	taxonomic classification defined by topology and ANI	N/A	N/A	85.79
SHASGE1bin.10	SH_SHASGE1	cultivable	91.71	0.73	93.4679	N/A	d__Bacteria;p__Proteobacteria;c__Gammaproteobacteria;o__Burkholderiales;f__Burkholderiaceae;g__Piscinibacter;s__Piscinibacter caeni	GCA_003265685.1	95	d__Bacteria;p__Proteobacteria;c__Gammaproteobacteria;o__Burkholderiales;f__Burkholderiaceae;g__Piscinibacter;s__Piscinibacter caeni	97.45	0.88	GCA_003265685.1	95	d__Bacteria;p__Proteobacteria;c__Gammaproteobacteria;o__Burkholderiales;f__Burkholderiaceae;g__Piscinibacter;s__Piscinibacter caeni	97.45	0.88	d__Bacteria;p__Proteobacteria;c__Gammaproteobacteria;o__Burkholderiales;f__Burkholderiaceae;g__Piscinibacter;s__	taxonomic classification defined by topology and ANI	topological placement and ANI have congruent species assignments	GCF_004011805.1, s__Piscinibacter defluvii, 95.0, 93.43, 0.86; GCA_007994965.1, s__Piscinibacter aquaticus, 95.0, 85.31, 0.65	90.49
SHASGE1bin.11	SH_SHASGE1	cultivable	60.54	5.833	7.83459	0.969494	d__Bacteria;p__Proteobacteria;c__Gammaproteobacteria;o__Burkholderiales;f__Burkholderiaceae;g__Hydrogenophaga;s__	N/A	N/A	N/A	N/A	N/A	N/A	N/A	N/A	N/A	N/A	d__Bacteria;p__Proteobacteria;c__Gammaproteobacteria;o__Burkholderiales;f__Burkholderiaceae;g__Hydrogenophaga;s__	taxonomic classification defined by topology and ANI	N/A	GCF_001592285.1, s__Hydrogenophaga pseudoflava, 95.0, 83.09, 0.72; GCF_001571145.1, s__Hydrogenophaga flava, 95.0, 82.85, 0.73; GCF_002127215.1, s__Hydrogenophaga sp002127215, 95.0, 81.77, 0.56; GCA_006227825.1, s__Hydrogenophaga sp006227825, 95.0, 81.77, 0.55; GCF_001592305.1, s__Hydrogenophaga taeniospiralis, 95.0, 81.73, 0.67; GCA_003509765.1, s__Hydrogenophaga sp003509765, 95.0, 81.67, 0.68; …	35.22
SHASGE1bin.12	SH_SHASGE1	cultivable	99.72	7.564	64.5231	0.931636	d__Bacteria;p__Proteobacteria;c__Alphaproteobacteria;o__Caulobacterales;f__Caulobacteraceae;g__Phenylobacterium;s__	N/A	N/A	N/A	N/A	N/A	N/A	N/A	N/A	N/A	N/A	d__Bacteria;p__Proteobacteria;c__Alphaproteobacteria;o__Caulobacterales;f__Caulobacteraceae;g__Phenylobacterium;s__	taxonomic classification defined by topology and ANI	N/A	GCF_003254505.1, s__Phenylobacterium hankyongense, 95.0, 82.33, 0.57; GCA_001724985.1, s__Phenylobacterium sp001724985, 95.0, 81.95, 0.69; GCF_003254475.1, s__Phenylobacterium sp003254475, 95.0, 81.82, 0.55; GCA_013911965.1, s__Phenylobacterium sp013911965, 95.0, 81.77, 0.59; GCF_000017265.1, s__Phenylobacterium zucineum, 95.0, 81.63, 0.52; GCF_001425305.1, s__Phenylobacterium sp001425305, 95.0, …	92.54
SHASGE1bin.13	SH_SHASGE1	cultivable	84.48	0	14.6081	0.967751	d__Bacteria;p__Proteobacteria;c__Alphaproteobacteria;o__Rhodobacterales;f__Rhodobacteraceae;g__Paenirhodobacter;s__	N/A	N/A	N/A	N/A	N/A	N/A	N/A	N/A	N/A	N/A	d__Bacteria;p__Proteobacteria;c__Alphaproteobacteria;o__Rhodobacterales;f__Rhodobacteraceae;g__Paenirhodobacter;s__	ANI	N/A	GCF_003664585.1, s__Paenirhodobacter hankyongi, 95.0, 82.46, 0.62; GCF_004022265.1, s__Paenirhodobacter ferrireducens, 95.0, 82.41, 0.6; GCF_004022215.1, s__Paenirhodobacter populi, 95.0, 82.05, 0.6; GCF_000740785.1, s__Paenirhodobacter enshiensis, 95.0, 81.56, 0.54	75.62
SHASGE1bin.14	SH_SHASGE1	cultivable	97.86	0.531	40.6588	N/A	d__Bacteria;p__Proteobacteria;c__Gammaproteobacteria;o__Xanthomonadales;f__Xanthomonadaceae;g__Stenotrophomonas;s__Stenotrophomonas daejeonensis	GCF_001431505.1	95	d__Bacteria;p__Proteobacteria;c__Gammaproteobacteria;o__Xanthomonadales;f__Xanthomonadaceae;g__Stenotrophomonas;s__Stenotrophomonas daejeonensis	98.05	0.9	GCF_001431505.1	95	d__Bacteria;p__Proteobacteria;c__Gammaproteobacteria;o__Xanthomonadales;f__Xanthomonadaceae;g__Stenotrophomonas;s__Stenotrophomonas daejeonensis	98.05	0.9	d__Bacteria;p__Proteobacteria;c__Gammaproteobacteria;o__Xanthomonadales;f__Xanthomonadaceae;g__Stenotrophomonas;s__	taxonomic classification defined by topology and ANI	topological placement and ANI have congruent species assignments	GCA_900078405.1, s__Stenotrophomonas sp900078405, 95.0, 94.28, 0.86; GCF_009496535.1, s__Stenotrophomonas sp003504055, 95.0, 89.27, 0.8; GCF_001431425.1, s__Stenotrophomonas nitritireducens, 95.0, 88.63, 0.77; GCF_002951995.1, s__Stenotrophomonas acidaminiphila_A, 95.0, 88.49, 0.78; GCF_001431595.1, s__Stenotrophomonas acidaminiphila, 95.0, 88.34, 0.78; GCF_004348115.1, s__Stenotrophomonas sp0043…	77.05
SHASGE1bin.15	SH_SHASGE1	cultivable	82.44	5.063	13.8688	N/A	d__Bacteria;p__Proteobacteria;c__Gammaproteobacteria;o__Enterobacterales;f__Enterobacteriaceae;g__Klebsiella;s__Klebsiella quasipneumoniae	GCF_000751755.1	95	d__Bacteria;p__Proteobacteria;c__Gammaproteobacteria;o__Enterobacterales;f__Enterobacteriaceae;g__Klebsiella;s__Klebsiella quasipneumoniae	96.43	0.93	GCF_000751755.1	95	d__Bacteria;p__Proteobacteria;c__Gammaproteobacteria;o__Enterobacterales;f__Enterobacteriaceae;g__Klebsiella;s__Klebsiella quasipneumoniae	96.43	0.93	d__Bacteria;p__Proteobacteria;c__Gammaproteobacteria;o__Enterobacterales;f__Enterobacteriaceae;g__Klebsiella;s__	taxonomic classification defined by topology and ANI	topological placement and ANI have congruent species assignments	GCF_000742135.1, s__Klebsiella pneumoniae, 95.0, 94.13, 0.91; GCF_000828055.2, s__Klebsiella variicola, 95.0, 93.76, 0.94; GCF_002269255.1, s__Klebsiella quasivariicola, 95.0, 92.97, 0.91; GCF_000215745.1, s__Klebsiella aerogenes, 95.0, 85.72, 0.77	66.87
SHASGE1bin.16	SH_SHASGE1	cultivable	94.07	4.041	17.402	N/A	d__Bacteria;p__Proteobacteria;c__Gammaproteobacteria;o__Burkholderiales;f__Burkholderiaceae;g__Diaphorobacter;s__Diaphorobacter nitroreducens	GCF_003755025.1	95	d__Bacteria;p__Proteobacteria;c__Gammaproteobacteria;o__Burkholderiales;f__Burkholderiaceae;g__Diaphorobacter;s__Diaphorobacter nitroreducens	97.71	0.88	GCF_003755025.1	95	d__Bacteria;p__Proteobacteria;c__Gammaproteobacteria;o__Burkholderiales;f__Burkholderiaceae;g__Diaphorobacter;s__Diaphorobacter nitroreducens	97.71	0.88	d__Bacteria;p__Proteobacteria;c__Gammaproteobacteria;o__Burkholderiales;f__Burkholderiaceae;g__;s__	taxonomic classification defined by topology and ANI	topological placement and ANI have congruent species assignments	N/A	81.87
SHASGE1bin.17	SH_SHASGE1	cultivable	90.83	0.7	16.622	0.974313	d__Bacteria;p__Proteobacteria;c__Gammaproteobacteria;o__Burkholderiales;f__Burkholderiaceae;g__Ramlibacter;s__	N/A	N/A	N/A	N/A	N/A	GCF_007833165.1	95	d__Bacteria;p__Proteobacteria;c__Gammaproteobacteria;o__Burkholderiales;f__Burkholderiaceae;g__Ramlibacter;s__Ramlibacter sp007833165	82.32	0.63	d__Bacteria;p__Proteobacteria;c__Gammaproteobacteria;o__Burkholderiales;f__Burkholderiaceae;g__Ramlibacter;s__	taxonomic classification defined by topology and ANI	N/A	GCF_013087525.1, s__Ramlibacter sp013087525, 95.0, 83.45, 0.59; GCA_004144865.1, s__Ramlibacter sp004144865, 95.0, 83.13, 0.55; GCF_000215705.1, s__Ramlibacter tataouinensis, 95.0, 83.03, 0.53; GCF_001424545.1, s__Ramlibacter sp001424545, 95.0, 82.89, 0.55; GCA_013697775.1, s__Ramlibacter sp013697775, 95.0, 82.67, 0.48; GCF_004681975.1, s__Ramlibacter sp004681975, 95.0, 82.59, 0.54; GCF_014297465…	73.81
SHASGE1bin.18	SH_SHASGE1	cultivable	58.14	1.165	8.69206	N/A	d__Bacteria;p__Actinobacteriota;c__Actinomycetia;o__Propionibacteriales;f__Propionibacteriaceae;g__Micropruina;s__Micropruina glycogenica	GCF_900289045.1	95	d__Bacteria;p__Actinobacteriota;c__Actinomycetia;o__Propionibacteriales;f__Propionibacteriaceae;g__Micropruina;s__Micropruina glycogenica	98.61	0.98	GCF_900289045.1	95	d__Bacteria;p__Actinobacteriota;c__Actinomycetia;o__Propionibacteriales;f__Propionibacteriaceae;g__Micropruina;s__Micropruina glycogenica	98.61	0.98	d__Bacteria;p__Actinobacteriota;c__Actinomycetia;o__Propionibacteriales;f__Propionibacteriaceae;g__Micropruina;s__	taxonomic classification defined by topology and ANI	topological placement and ANI have congruent species assignments	GCA_013693855.1, s__Micropruina sp013693855, 95.0, 79.2, 0.49	48
SHASGE1bin.19	SH_SHASGE1	cultivable	96.25	1.879	13.0902	0.986695	d__Bacteria;p__Proteobacteria;c__Gammaproteobacteria;o__Xanthomonadales;f__Xanthomonadaceae;g__Pseudoxanthomonas;s__	N/A	N/A	N/A	N/A	N/A	GCF_010093225.1	95	d__Bacteria;p__Proteobacteria;c__Gammaproteobacteria;o__Xanthomonadales;f__Xanthomonadaceae;g__Pseudoxanthomonas;s__Pseudoxanthomonas koreensis	86.77	0.74	d__Bacteria;p__Proteobacteria;c__Gammaproteobacteria;o__Xanthomonadales;f__Xanthomonadaceae;g__Pseudoxanthomonas;s__	taxonomic classification defined by topology and ANI	N/A	GCF_000972865.1, s__Pseudoxanthomonas suwonensis_B, 95.0, 86.43, 0.78; GCF_010093185.1, s__Pseudoxanthomonas jiangsuensis, 95.0, 86.21, 0.76; GCF_000513995.1, s__Pseudoxanthomonas sp000513995, 95.0, 86.14, 0.75; GCF_010211765.1, s__Pseudoxanthomonas kaohsiungensis, 95.0, 86.05, 0.77; GCF_000513955.1, s__Pseudoxanthomonas suwonensis_C, 95.0, 85.87, 0.76; GCF_014202435.1, s__Pseudoxanthomonas broeg…	86.64
SHASGE1bin.2	SH_SHASGE1	cultivable	96.4	0.923	11.5073	0.986881	d__Bacteria;p__Actinobacteriota;c__Actinomycetia;o__Actinomycetales;f__Microbacteriaceae;g__Microbacterium;s__	N/A	N/A	N/A	N/A	N/A	GCF_001428485.1	95	d__Bacteria;p__Actinobacteriota;c__Actinomycetia;o__Actinomycetales;f__Microbacteriaceae;g__Microbacterium;s__Microbacterium sp001428485	86.61	0.84	d__Bacteria;p__Actinobacteriota;c__Actinomycetia;o__Actinomycetales;f__Microbacteriaceae;g__Microbacterium;s__	taxonomic classification defined by topology and ANI	N/A	GCF_012847295.1, s__Microbacterium sp012847295, 95.0, 84.59, 0.75; GCF_003999995.1, s__Microbacterium sp003999995, 95.0, 84.34, 0.78; GCF_001427145.1, s__Microbacterium sp001427145, 95.0, 83.69, 0.73; GCF_003386735.1, s__Microbacterium trichothecenolyticum_A, 95.0, 83.1, 0.71; GCF_001422925.1, s__Microbacterium sp001422925, 95.0, 83.05, 0.75; GCF_000956465.1, s__Microbacterium trichothecenolyticu…	86.66
SHASGE1bin.20	SH_SHASGE1	cultivable	99.65	1.383	45.8841	0.986454	d__Bacteria;p__Proteobacteria;c__Gammaproteobacteria;o__Xanthomonadales;f__Xanthomonadaceae;g__Thermomonas;s__	N/A	N/A	N/A	N/A	N/A	GCF_014396975.1	95	d__Bacteria;p__Proteobacteria;c__Gammaproteobacteria;o__Xanthomonadales;f__Xanthomonadaceae;g__Thermomonas;s__Thermomonas carbonis	88.74	0.85	d__Bacteria;p__Proteobacteria;c__Gammaproteobacteria;o__Xanthomonadales;f__Xanthomonadaceae;g__Thermomonas;s__	taxonomic classification defined by topology and ANI	N/A	GCF_006337105.1, s__Thermomonas sp006337105, 95.0, 85.64, 0.79; GCF_011302915.1, s__Thermomonas sp011302915, 95.0, 84.01, 0.74; GCF_014395425.1, s__Thermomonas brevis, 95.0, 83.91, 0.7; GCF_000423885.1, s__Thermomonas fusca, 95.0, 83.37, 0.67; GCF_004346265.1, s__Thermomonas haemolytica, 95.0, 82.98, 0.7; GCF_900129205.1, s__Thermomonas hydrothermalis, 95.0, 80.03, 0.6	91.9
SHASGE1bin.21	SH_SHASGE1	cultivable	91.32	1.753	11.0226	0.9647	d__Bacteria;p__Proteobacteria;c__Alphaproteobacteria;o__Sphingomonadales;f__Sphingomonadaceae;g__Sandaracinobacter;s__	N/A	N/A	N/A	N/A	N/A	N/A	N/A	N/A	N/A	N/A	d__Bacteria;p__Proteobacteria;c__Alphaproteobacteria;o__Sphingomonadales;f__Sphingomonadaceae;g__Sandaracinobacter;s__	taxonomic classification defined by topology and ANI	N/A	GCA_003248865.1, s__Sandaracinobacter sp003248865, 95.0, 84.2, 0.78; GCF_006385875.1, s__Sandaracinobacter neustonicus, 95.0, 84.11, 0.79; GCA_002422985.1, s__Sandaracinobacter sp002422985, 95.0, 78.94, 0.48	89.8
SHASGE1bin.22	SH_SHASGE1	cultivable	91.6	2.761	348.477	0.994949	d__Bacteria;p__Proteobacteria;c__Gammaproteobacteria;o__Burkholderiales;f__Burkholderiaceae;g__Giesbergeria;s__	N/A	N/A	N/A	N/A	N/A	GCF_010020825.1	95	d__Bacteria;p__Proteobacteria;c__Gammaproteobacteria;o__Burkholderiales;f__Burkholderiaceae;g__Giesbergeria;s__Giesbergeria sp010020825	91	0.83	d__Bacteria;p__Proteobacteria;c__Gammaproteobacteria;o__Burkholderiales;f__Burkholderiaceae;g__Giesbergeria;s__	taxonomic classification defined by topology and ANI	N/A	GCF_000739995.1, s__Giesbergeria granuli, 95.0, 86.01, 0.72; GCF_003604195.1, s__Giesbergeria lacusdiani, 95.0, 85.92, 0.74; GCA_001770955.1, s__Giesbergeria sp001770955, 95.0, 84.81, 0.66; GCF_003096555.1, s__Giesbergeria sp003096555, 95.0, 82.62, 0.66; GCF_012932145.1, s__Giesbergeria sp012932145, 95.0, 82.2, 0.58; GCA_001724785.1, s__Giesbergeria sp001724785, 95.0, 81.65, 0.5; GCF_004341365.1,…	80.82
SHASGE1bin.24	SH_SHASGE1	cultivable	98.96	1.924	16.4484	0.96128	d__Bacteria;p__Proteobacteria;c__Gammaproteobacteria;o__Xanthomonadales;f__Xanthomonadaceae;g__Thermomonas;s__	N/A	N/A	N/A	N/A	N/A	N/A	N/A	N/A	N/A	N/A	d__Bacteria;p__Proteobacteria;c__Gammaproteobacteria;o__Xanthomonadales;f__Xanthomonadaceae;g__Thermomonas;s__	taxonomic classification defined by topology and ANI	N/A	GCF_006337105.1, s__Thermomonas sp006337105, 95.0, 85.55, 0.8; GCF_014395425.1, s__Thermomonas brevis, 95.0, 84.58, 0.74; GCF_004346265.1, s__Thermomonas haemolytica, 95.0, 84.21, 0.69; GCF_000423885.1, s__Thermomonas fusca, 95.0, 83.83, 0.72; GCF_014396975.1, s__Thermomonas carbonis, 95.0, 83.74, 0.76; GCF_011302915.1, s__Thermomonas sp011302915, 95.0, 83.56, 0.74; GCF_900129205.1, s__Thermomona…	91.22
SHASGE1bin.25	SH_SHASGE1	cultivable	78.79	2.495	6.4966	0.994572	d__Bacteria;p__Bacteroidota;c__Bacteroidia;o__Chitinophagales;f__Chitinophagaceae;g__Parafilimonas;s__	N/A	N/A	N/A	N/A	N/A	GCF_900115755.1	95	d__Bacteria;p__Bacteroidota;c__Bacteroidia;o__Chitinophagales;f__Chitinophagaceae;g__Parafilimonas;s__Parafilimonas terrae	89.12	0.84	d__Bacteria;p__Bacteroidota;c__Bacteroidia;o__Chitinophagales;f__Chitinophagaceae;g__Parafilimonas;s__	taxonomic classification defined by topology and ANI	N/A	GCA_013289015.1, s__Parafilimonas sp013289015, 95.0, 77.68, 0.2; GCA_013286425.1, s__Parafilimonas sp013286425, 95.0, 77.32, 0.2; GCA_013288785.1, s__Parafilimonas sp013288785, 95.0, 77.23, 0.2; GCA_013285855.1, s__Parafilimonas sp013285855, 95.0, 77.11, 0.21; GCF_903642275.1, s__Parafilimonas sp903642275, 95.0, 76.64, 0.22	67.92
SHASGE1bin.26	SH_SHASGE1	cultivable	99.12	0.582	17.493	0.958871	d__Bacteria;p__Proteobacteria;c__Alphaproteobacteria;o__Dongiales;f__Dongiaceae;g__Dongia;s__	N/A	N/A	N/A	N/A	N/A	GCF_004363235.1	95	d__Bacteria;p__Proteobacteria;c__Alphaproteobacteria;o__Dongiales;f__Dongiaceae;g__Dongia;s__Dongia mobilis	82.38	0.73	d__Bacteria;p__Proteobacteria;c__Alphaproteobacteria;o__Dongiales;f__Dongiaceae;g__Dongia;s__	taxonomic classification defined by topology and ANI	N/A	GCF_000620685.1, s__Dongia sp000620685, 95.0, 77.96, 0.3	95.69
SHASGE1bin.27	SH_SHASGE1	cultivable	98.27	9.482	14.0302	0.983352	d__Bacteria;p__Proteobacteria;c__Alphaproteobacteria;o__Sphingomonadales;f__Sphingomonadaceae;g__Novosphingobium;s__	N/A	N/A	N/A	N/A	N/A	GCA_002440635.1	95	d__Bacteria;p__Proteobacteria;c__Alphaproteobacteria;o__Sphingomonadales;f__Sphingomonadaceae;g__Novosphingobium;s__Novosphingobium sp002440635	82.3	0.6	d__Bacteria;p__Proteobacteria;c__Alphaproteobacteria;o__Sphingomonadales;f__Sphingomonadaceae;g__Novosphingobium;s__	taxonomic classification defined by topology and ANI	N/A	GCA_014652615.1, s__Novosphingobium arvoryzae, 95.0, 81.73, 0.54; GCA_013822005.1, s__Novosphingobium sp013822005, 95.0, 81.54, 0.65; GCF_002198665.1, s__Novosphingobium sp002198665, 95.0, 81.13, 0.52; GCA_013141325.1, s__Novosphingobium sp013141325, 95.0, 81.06, 0.66; GCA_009885425.1, s__Novosphingobium sp009885425, 95.0, 80.8, 0.68; GCA_002454125.1, s__Novosphingobium sp002454125, 95.0, 80.63, …	82.37
SHASGE1bin.28	SH_SHASGE1	cultivable	90.84	1.797	10.3602	0.975807	d__Bacteria;p__Proteobacteria;c__Alphaproteobacteria;o__Rhodobacterales;f__Rhodobacteraceae;g__Tabrizicola;s__	N/A	N/A	N/A	N/A	N/A	N/A	N/A	N/A	N/A	N/A	d__Bacteria;p__Proteobacteria;c__Alphaproteobacteria;o__Rhodobacterales;f__Rhodobacteraceae;g__Tabrizicola;s__	taxonomic classification defined by topology and ANI	N/A	GCF_003574395.1, s__Tabrizicola thermarum, 95.0, 84.82, 0.72; GCF_008271465.1, s__Tabrizicola flagellatus, 95.0, 84.77, 0.72; GCF_011174775.1, s__Tabrizicola sp011174775, 95.0, 84.69, 0.7; GCF_005222785.1, s__Tabrizicola sp005222785, 95.0, 84.61, 0.78; GCA_013824055.1, s__Tabrizicola sp013824055, 95.0, 84.43, 0.7; GCA_002280405.1, s__Tabrizicola sp002280405, 95.0, 83.63, 0.66; GCF_002900975.1, s_…	71.23
SHASGE1bin.29	SH_SHASGE1	cultivable	99.19	0.571	51.2869	N/A	d__Bacteria;p__Proteobacteria;c__Gammaproteobacteria;o__Xanthomonadales;f__Xanthomonadaceae;g__Xanthomonas_B;s__Xanthomonas_B sp003449195	GCA_003449195.1	95	d__Bacteria;p__Proteobacteria;c__Gammaproteobacteria;o__Xanthomonadales;f__Xanthomonadaceae;g__Xanthomonas_B;s__Xanthomonas_B sp003449195	97.36	0.89	GCA_003449195.1	95	d__Bacteria;p__Proteobacteria;c__Gammaproteobacteria;o__Xanthomonadales;f__Xanthomonadaceae;g__Xanthomonas_B;s__Xanthomonas_B sp003449195	97.36	0.89	d__Bacteria;p__Proteobacteria;c__Gammaproteobacteria;o__Xanthomonadales;f__Xanthomonadaceae;g__Xanthomonas_B;s__	taxonomic classification defined by topology and ANI	topological placement and ANI have congruent species assignments	GCF_900018785.1, s__Xanthomonas_B massiliensis, 95.0, 83.81, 0.7	98.45
SHASGE1bin.3	SH_SHASGE1	cultivable	92.87	0.037	13.4962	N/A	d__Bacteria;p__Proteobacteria;c__Alphaproteobacteria;o__Rhodobacterales;f__Rhodobacteraceae;g__Paracoccus;s__Paracoccus pantotrophus	GCF_008824185.1	95	d__Bacteria;p__Proteobacteria;c__Alphaproteobacteria;o__Rhodobacterales;f__Rhodobacteraceae;g__Paracoccus;s__Paracoccus pantotrophus	99.32	0.97	GCF_008824185.1	95	d__Bacteria;p__Proteobacteria;c__Alphaproteobacteria;o__Rhodobacterales;f__Rhodobacteraceae;g__Paracoccus;s__Paracoccus pantotrophus	99.32	0.97	d__Bacteria;p__Proteobacteria;c__Alphaproteobacteria;o__Rhodobacterales;f__Rhodobacteraceae;g__Paracoccus;s__	taxonomic classification defined by topology and ANI	topological placement and ANI have congruent species assignments	GCF_000763885.1, s__Paracoccus versutus, 95.0, 93.67, 0.87; GCF_000518925.1, s__Paracoccus sp000518925, 95.0, 92.16, 0.82; GCF_001447385.1, s__Paracoccus sp001447385, 95.0, 92.07, 0.84; GCF_900100045.1, s__Paracoccus denitrificans, 95.0, 91.68, 0.84; GCF_900156255.1, s__Paracoccus thiocyanatus, 95.0, 89.97, 0.72; GCF_001546115.1, s__Paracoccus aminovorans_B, 95.0, 87.69, 0.75; GCF_900005615.1, s_…	83.46
SHASGE1bin.30	SH_SHASGE1	cultivable	74.86	2.147	8.00358	N/A	d__Bacteria;p__Proteobacteria;c__Gammaproteobacteria;o__Burkholderiales;f__Rhodocyclaceae;g__Zoogloea;s__Zoogloea sp009469605	GCF_009469605.1	95	d__Bacteria;p__Proteobacteria;c__Gammaproteobacteria;o__Burkholderiales;f__Rhodocyclaceae;g__Zoogloea;s__Zoogloea sp009469605	97.12	0.94	GCF_009469605.1	95	d__Bacteria;p__Proteobacteria;c__Gammaproteobacteria;o__Burkholderiales;f__Rhodocyclaceae;g__Zoogloea;s__Zoogloea sp009469605	97.12	0.94	d__Bacteria;p__Proteobacteria;c__Gammaproteobacteria;o__Burkholderiales;f__Rhodocyclaceae;g__Zoogloea;s__	taxonomic classification defined by topology and ANI	topological placement and ANI have congruent species assignments	GCF_006539865.1, s__Zoogloea ramigera, 95.0, 84.45, 0.73; GCA_009026175.1, s__Zoogloea sp009026175, 95.0, 82.99, 0.65; GCF_012927165.1, s__Zoogloea sp012927165, 95.0, 82.98, 0.7; GCF_002028455.1, s__Zoogloea sp002028455, 95.0, 82.87, 0.67; GCF_008107625.1, s__Zoogloea oleivorans, 95.0, 82.81, 0.69; GCA_008011925.1, s__Zoogloea sp008011925, 95.0, 81.66, 0.47	49.39
SHASGE1bin.31	SH_SHASGE1	cultivable	99.18	1.623	182.654	0.948296	d__Bacteria;p__Proteobacteria;c__Alphaproteobacteria;o__Caulobacterales;f__Caulobacteraceae;g__Phenylobacterium;s__	N/A	N/A	N/A	N/A	N/A	N/A	N/A	N/A	N/A	N/A	d__Bacteria;p__Proteobacteria;c__Alphaproteobacteria;o__Caulobacterales;f__Caulobacteraceae;g__Phenylobacterium;s__	taxonomic classification defined by topology and ANI	N/A	GCA_001724985.1, s__Phenylobacterium sp001724985, 95.0, 82.13, 0.68; GCF_001429025.1, s__Phenylobacterium sp001429025, 95.0, 81.63, 0.55; GCF_001425305.1, s__Phenylobacterium sp001425305, 95.0, 81.48, 0.53; GCA_013822795.1, s__Phenylobacterium sp013822795, 95.0, 81.46, 0.52; GCF_003254505.1, s__Phenylobacterium hankyongense, 95.0, 81.46, 0.54; GCF_014196295.1, s__Phenylobacterium haematophilum, 9…	94.8
SHASGE1bin.32	SH_SHASGE1	cultivable	97.7	1.786	13.9642	0.994311	d__Bacteria;p__Proteobacteria;c__Alphaproteobacteria;o__Sphingomonadales;f__Sphingomonadaceae;g__Novosphingobium;s__	N/A	N/A	N/A	N/A	N/A	GCA_014652615.1	95	d__Bacteria;p__Proteobacteria;c__Alphaproteobacteria;o__Sphingomonadales;f__Sphingomonadaceae;g__Novosphingobium;s__Novosphingobium arvoryzae	91.16	0.89	d__Bacteria;p__Proteobacteria;c__Alphaproteobacteria;o__Sphingomonadales;f__Sphingomonadaceae;g__Novosphingobium;s__	taxonomic classification defined by topology and ANI	N/A	GCF_002198665.1, s__Novosphingobium sp002198665, 95.0, 81.66, 0.71; GCA_009926135.1, s__Novosphingobium sp009926135, 95.0, 80.86, 0.59; GCA_002454125.1, s__Novosphingobium sp002454125, 95.0, 80.78, 0.59; GCA_002440635.1, s__Novosphingobium sp002440635, 95.0, 80.64, 0.62; GCA_013141325.1, s__Novosphingobium sp013141325, 95.0, 80.51, 0.65; GCA_013822005.1, s__Novosphingobium sp013822005, 95.0, 80.4…	82.75
SHASGE1bin.33	SH_SHASGE1	cultivable	97.44	1.996	23.7779	N/A	d__Bacteria;p__Proteobacteria;c__Gammaproteobacteria;o__Pseudomonadales;f__Moraxellaceae;g__Acinetobacter;s__Acinetobacter ursingii	GCF_000368825.1	95	d__Bacteria;p__Proteobacteria;c__Gammaproteobacteria;o__Pseudomonadales;f__Moraxellaceae;g__Acinetobacter;s__Acinetobacter ursingii	98.99	0.88	GCF_000368825.1	95	d__Bacteria;p__Proteobacteria;c__Gammaproteobacteria;o__Pseudomonadales;f__Moraxellaceae;g__Acinetobacter;s__Acinetobacter ursingii	98.99	0.88	d__Bacteria;p__Proteobacteria;c__Gammaproteobacteria;o__Pseudomonadales;f__Moraxellaceae;g__Acinetobacter;s__	taxonomic classification defined by topology and ANI	topological placement and ANI have congruent species assignments	GCF_009372255.1, s__Acinetobacter guerrae, 95.0, 88.63, 0.79; GCF_900625095.1, s__Acinetobacter sp900625095, 95.0, 84.96, 0.73; GCF_000368685.1, s__Acinetobacter baylyi, 95.0, 80.53, 0.47; GCF_000368025.1, s__Acinetobacter parvus, 95.0, 80.06, 0.39; GCF_000760595.1, s__Acinetobacter soli, 95.0, 79.88, 0.41; GCF_902753875.1, s__Acinetobacter bouvetii_A, 95.0, 79.73, 0.35; GCF_000369065.1, s__Acine…	95.77
SHASGE1bin.34	SH_SHASGE1	cultivable	98.4	1.037	15.3652	0.991702	d__Bacteria;p__Proteobacteria;c__Gammaproteobacteria;o__Burkholderiales;f__Rhodocyclaceae;g__Niveibacterium;s__	N/A	N/A	N/A	N/A	N/A	GCF_013184235.1	95	d__Bacteria;p__Proteobacteria;c__Gammaproteobacteria;o__Burkholderiales;f__Rhodocyclaceae;g__Niveibacterium;s__Niveibacterium sp013184235	88.13	0.84	d__Bacteria;p__Proteobacteria;c__Gammaproteobacteria;o__Burkholderiales;f__Rhodocyclaceae;g__Niveibacterium;s__	taxonomic classification defined by topology and ANI	N/A	GCF_014197015.1, s__Niveibacterium umoris, 95.0, 83.58, 0.67; GCA_009781175.1, s__Niveibacterium sp009781175, 95.0, 78.29, 0.27	92.5
SHASGE1bin.35	SH_SHASGE1	cultivable	76.77	3.508	25.8975	0.970438	d__Bacteria;p__Verrucomicrobiota;c__Verrucomicrobiae;o__Opitutales;f__Opitutaceae;g__Lacunisphaera;s__	N/A	N/A	N/A	N/A	N/A	GCF_900104925.1	95	d__Bacteria;p__Verrucomicrobiota;c__Verrucomicrobiae;o__Opitutales;f__Opitutaceae;g__Lacunisphaera;s__Lacunisphaera sp900104925	85.58	0.66	d__Bacteria;p__Verrucomicrobiota;c__Verrucomicrobiae;o__Opitutales;f__Opitutaceae;g__Lacunisphaera;s__	taxonomic classification defined by topology and ANI	N/A	GCA_001464505.1, s__Lacunisphaera sp001464505, 95.0, 83.21, 0.63; GCF_001746835.1, s__Lacunisphaera limnophila, 95.0, 81.77, 0.52; GCF_004118375.1, s__Lacunisphaera lentus, 95.0, 81.6, 0.54; GCA_009695095.1, s__Lacunisphaera sp009695095, 95.0, 81.49, 0.59; GCA_903898675.1, s__Lacunisphaera sp903898675, 95.0, 81.23, 0.49; GCA_002304425.1, s__Lacunisphaera sp002304425, 95.0, 77.38, 0.19; GCA_903906…	64.84
SHASGE1bin.36	SH_SHASGE1	cultivable	97.33	0.459	22.6704	N/A	d__Bacteria;p__Proteobacteria;c__Gammaproteobacteria;o__Xanthomonadales;f__Xanthomonadaceae;g__Pseudoxanthomonas;s__Pseudoxanthomonas kaohsiungensis	GCF_010211765.1	95	d__Bacteria;p__Proteobacteria;c__Gammaproteobacteria;o__Xanthomonadales;f__Xanthomonadaceae;g__Pseudoxanthomonas;s__Pseudoxanthomonas kaohsiungensis	97.04	0.92	GCF_010211765.1	95	d__Bacteria;p__Proteobacteria;c__Gammaproteobacteria;o__Xanthomonadales;f__Xanthomonadaceae;g__Pseudoxanthomonas;s__Pseudoxanthomonas kaohsiungensis	97.04	0.92	d__Bacteria;p__Proteobacteria;c__Gammaproteobacteria;o__Xanthomonadales;f__Xanthomonadaceae;g__Pseudoxanthomonas;s__	taxonomic classification defined by topology and ANI	topological placement and ANI have congruent species assignments	GCF_000972865.1, s__Pseudoxanthomonas suwonensis_B, 95.0, 88.27, 0.84; GCF_010093225.1, s__Pseudoxanthomonas koreensis, 95.0, 87.79, 0.77; GCF_010093205.1, s__Pseudoxanthomonas daejeonensis, 95.0, 87.57, 0.85; GCF_000513995.1, s__Pseudoxanthomonas sp000513995, 95.0, 87.27, 0.79; GCF_000513955.1, s__Pseudoxanthomonas suwonensis_C, 95.0, 87.25, 0.79; GCF_010093185.1, s__Pseudoxanthomonas jiangsuens…	87.45
SHASGE1bin.37	SH_SHASGE1	cultivable	50.36	2.16	8.05194	0.997082	d__Bacteria;p__Proteobacteria;c__Alphaproteobacteria;o__Rhizobiales;f__Rhizobiaceae;g__Allorhizobium;s__	N/A	N/A	N/A	N/A	N/A	GCF_900492205.1	95	d__Bacteria;p__Proteobacteria;c__Alphaproteobacteria;o__Rhizobiales;f__Rhizobiaceae;g__Allorhizobium;s__Allorhizobium naphthalenivorans_A	93.67	0.91	d__Bacteria;p__Proteobacteria;c__Alphaproteobacteria;o__Rhizobiales;f__Rhizobiaceae;g__Allorhizobium;s__	taxonomic classification defined by topology and ANI	N/A	GCF_000518785.1, s__Allorhizobium selenitireducens, 95.0, 87.97, 0.84; GCA_002796995.1, s__Allorhizobium sp002796995, 95.0, 87.9, 0.85; GCA_002307905.1, s__Allorhizobium sp002307905, 95.0, 86.27, 0.74; GCF_007992095.1, s__Allorhizobium naphthalenivorans, 95.0, 83.82, 0.79; GCF_012927355.1, s__Allorhizobium sp012927355, 95.0, 83.74, 0.78; GCA_003527225.1, s__Allorhizobium sp003527225, 95.0, 82.29,…	49.67
SHASGE1bin.4	SH_SHASGE1	cultivable	98.53	0.833	31.5845	N/A	d__Bacteria;p__Proteobacteria;c__Gammaproteobacteria;o__Pseudomonadales;f__Pseudomonadaceae;g__Pseudomonas_E;s__Pseudomonas_E oleovorans	GCF_002197815.1	96.52	d__Bacteria;p__Proteobacteria;c__Gammaproteobacteria;o__Pseudomonadales;f__Pseudomonadaceae;g__Pseudomonas_E;s__Pseudomonas_E oleovorans	97.31	0.83	N/A	N/A	N/A	N/A	N/A	d__Bacteria;p__Proteobacteria;c__Gammaproteobacteria;o__Pseudomonadales;f__Pseudomonadaceae;g__Pseudomonas_E;s__	ANI	topological placement and ANI have incongruent species assignments	GCF_002197815.1, s__Pseudomonas_E oleovorans, 96.52, 97.31, 0.83; GCF_003052605.1, s__Pseudomonas_E indoloxydans, 96.52, 96.11, 0.82; GCF_001941865.1, s__Pseudomonas_E alcaliphila_B, 95.7502, 93.87, 0.82; GCF_900106015.1, s__Pseudomonas_E sihuiensis, 96.7402, 93.68, 0.83; GCF_900102635.1, s__Pseudomonas_E chengduensis, 96.7402, 93.55, 0.81; GCF_002803095.1, s__Pseudomonas_E sp002803095, 95.6432, …	97.9
SHASGE1bin.5	SH_SHASGE1	cultivable	98.01	0	22.314	N/A	d__Bacteria;p__Proteobacteria;c__Gammaproteobacteria;o__Pseudomonadales;f__Moraxellaceae;g__Acinetobacter;s__Acinetobacter towneri	GCF_000368785.1	95	d__Bacteria;p__Proteobacteria;c__Gammaproteobacteria;o__Pseudomonadales;f__Moraxellaceae;g__Acinetobacter;s__Acinetobacter towneri	97.41	0.9	GCF_000368785.1	95	d__Bacteria;p__Proteobacteria;c__Gammaproteobacteria;o__Pseudomonadales;f__Moraxellaceae;g__Acinetobacter;s__Acinetobacter towneri	97.41	0.9	d__Bacteria;p__Proteobacteria;c__Gammaproteobacteria;o__Pseudomonadales;f__Moraxellaceae;g__Acinetobacter;s__	taxonomic classification defined by topology and ANI	topological placement and ANI have congruent species assignments	GCF_001758345.1, s__Acinetobacter towneri_A, 95.0, 93.93, 0.86; GCA_002296655.1, s__Acinetobacter sp002296655, 95.0, 93.78, 0.84; GCF_012371325.1, s__Acinetobacter sp012371325, 95.0, 89.04, 0.82; GCF_000488255.1, s__Acinetobacter indicus, 95.0, 81.53, 0.64; GCF_000368045.1, s__Acinetobacter johnsonii, 95.0, 80.84, 0.57; GCF_009707625.1, s__Acinetobacter sp009707625, 95.0, 80.72, 0.5; GCF_00696556…	96.03
SHASGE1bin.6	SH_SHASGE1	cultivable	61.2	3.448	10.9292	0.825728	d__Bacteria;p__Proteobacteria;c__Gammaproteobacteria;o__Burkholderiales;f__Chitinimonadaceae;g__;s__	N/A	N/A	N/A	N/A	N/A	N/A	N/A	N/A	N/A	N/A	d__Bacteria;p__Proteobacteria;c__Gammaproteobacteria;o__Burkholderiales;f__;g__;s__	taxonomic novelty determined using RED	N/A	N/A	62.22
SHASGE1bin.7	SH_SHASGE1	cultivable	61.2	0.862	33.6196	0.984835	d__Bacteria;p__Proteobacteria;c__Alphaproteobacteria;o__Rhizobiales;f__Aestuariivirgaceae;g__Aestuariivirga;s__	N/A	N/A	N/A	N/A	N/A	GCF_003234965.1	95	d__Bacteria;p__Proteobacteria;c__Alphaproteobacteria;o__Rhizobiales;f__Aestuariivirgaceae;g__Aestuariivirga;s__Aestuariivirga litoralis	87.04	0.81	d__Bacteria;p__Proteobacteria;c__Alphaproteobacteria;o__Rhizobiales;f__Aestuariivirgaceae;g__Aestuariivirga;s__	taxonomic classification defined by topology and ANI	N/A	GCA_903930095.1, s__Aestuariivirga sp903930095, 95.0, 81.83, 0.52; GCA_900298995.1, s__Aestuariivirga sp900298995, 95.0, 80.67, 0.52; GCA_012032065.1, s__Aestuariivirga sp012032065, 95.0, 77.94, 0.28; GCA_009885825.1, s__Aestuariivirga sp009885825, 95.0, 77.54, 0.16; GCA_902826365.1, s__Aestuariivirga sp902826365, 95.0, 77.37, 0.21; GCA_014380505.1, s__Aestuariivirga sp014380505, 95.0, 77.14, 0.2…	51.48
SHASGE1bin.8	SH_SHASGE1	cultivable	52.31	1.854	153.231	N/A	d__Bacteria;p__Proteobacteria;c__Gammaproteobacteria;o__Burkholderiales;f__Burkholderiaceae;g__Giesbergeria;s__Giesbergeria sp010020825	GCF_010020825.1	95	d__Bacteria;p__Proteobacteria;c__Gammaproteobacteria;o__Burkholderiales;f__Burkholderiaceae;g__Giesbergeria;s__Giesbergeria sp010020825	98.32	0.96	GCF_010020825.1	95	d__Bacteria;p__Proteobacteria;c__Gammaproteobacteria;o__Burkholderiales;f__Burkholderiaceae;g__Giesbergeria;s__Giesbergeria sp010020825	98.32	0.96	d__Bacteria;p__Proteobacteria;c__Gammaproteobacteria;o__Burkholderiales;f__Burkholderiaceae;g__Giesbergeria;s__	taxonomic classification defined by topology and ANI	topological placement and ANI have congruent species assignments	GCF_003604195.1, s__Giesbergeria lacusdiani, 95.0, 85.22, 0.83; GCF_000739995.1, s__Giesbergeria granuli, 95.0, 84.84, 0.81; GCA_001770955.1, s__Giesbergeria sp001770955, 95.0, 83.71, 0.8; GCF_003096555.1, s__Giesbergeria sp003096555, 95.0, 81.85, 0.71; GCF_012932145.1, s__Giesbergeria sp012932145, 95.0, 81.53, 0.66; GCF_004341365.1, s__Giesbergeria metamorpha, 95.0, 81.01, 0.66; GCA_001724785.1,…	35.85
SHASGE1bin.9	SH_SHASGE1	cultivable	97.62	0	36.3167	N/A	d__Bacteria;p__Proteobacteria;c__Gammaproteobacteria;o__Enterobacterales;f__Aeromonadaceae;g__Aeromonas;s__Aeromonas media	GCF_000819985.1	95	d__Bacteria;p__Proteobacteria;c__Gammaproteobacteria;o__Enterobacterales;f__Aeromonadaceae;g__Aeromonas;s__Aeromonas media	97.51	0.88	GCF_000819985.1	95	d__Bacteria;p__Proteobacteria;c__Gammaproteobacteria;o__Enterobacterales;f__Aeromonadaceae;g__Aeromonas;s__Aeromonas media	97.51	0.88	d__Bacteria;p__Proteobacteria;c__Gammaproteobacteria;o__Enterobacterales;f__Aeromonadaceae;g__Aeromonas;s__	taxonomic classification defined by topology and ANI	topological placement and ANI have congruent species assignments	GCF_010974825.1, s__Aeromonas rivipollensis, 95.0, 93.91, 0.91; GCF_000820085.1, s__Aeromonas sanarellii, 95.0, 90.84, 0.86; GCF_000820165.1, s__Aeromonas taiwanensis, 95.0, 90.0, 0.85; GCF_000819785.1, s__Aeromonas caviae, 95.0, 89.92, 0.87; GCF_900637545.1, s__Aeromonas encheleia, 95.0, 89.61, 0.88; GCF_000764655.1, s__Aeromonas aquatica, 95.0, 89.43, 0.86; GCF_000819865.1, s__Aeromonas eucreno…	98.69
SHASGE2bin.1	SH_SHASGE2	cultivable	100	0.025	23.9016	N/A	d__Bacteria;p__Proteobacteria;c__Gammaproteobacteria;o__Burkholderiales;f__Leeiaceae;g__Leeia;s__Leeia sp012641365	GCF_012641365.1	95	d__Bacteria;p__Proteobacteria;c__Gammaproteobacteria;o__Burkholderiales;f__Leeiaceae;g__Leeia;s__Leeia sp012641365	96.38	0.92	GCF_012641365.1	95	d__Bacteria;p__Proteobacteria;c__Gammaproteobacteria;o__Burkholderiales;f__Leeiaceae;g__Leeia;s__Leeia sp012641365	96.38	0.92	d__Bacteria;p__Proteobacteria;c__Gammaproteobacteria;o__Burkholderiales;f__Leeiaceae;g__Leeia;s__	taxonomic classification defined by topology and ANI	topological placement and ANI have congruent species assignments	GCF_000376945.1, s__Leeia oryzae, 95.0, 77.17, 0.2	98.61
SHASGE2bin.10	SH_SHASGE2	cultivable	99.76	0.157	1266.08	0.914885	d__Bacteria;p__Proteobacteria;c__Gammaproteobacteria;o__Burkholderiales;f__Rhodocyclaceae;g__Azonexus;s__	N/A	N/A	N/A	N/A	N/A	N/A	N/A	N/A	N/A	N/A	d__Bacteria;p__Proteobacteria;c__Gammaproteobacteria;o__Burkholderiales;f__Rhodocyclaceae;g__Azonexus;s__	taxonomic classification defined by topology and ANI	N/A	GCF_003634965.1, s__Azonexus fungiphilus, 95.0, 84.57, 0.61; GCF_009469615.1, s__Azonexus sp009469615, 95.0, 84.48, 0.6; GCF_009469585.1, s__Azonexus sp009469585, 95.0, 84.2, 0.6; GCF_000429605.1, s__Azonexus hydrophilus, 95.0, 83.62, 0.6; GCA_002425245.1, s__Azonexus sp002425245, 95.0, 83.57, 0.57; GCA_008933675.1, s__Azonexus sp008933675, 95.0, 83.5, 0.57; GCA_903922075.1, s__Azonexus sp9039220…	97.62
SHASGE2bin.11	SH_SHASGE2	cultivable	69.2	3.107	17.242	N/A	d__Bacteria;p__Proteobacteria;c__Gammaproteobacteria;o__Enterobacterales;f__Enterobacteriaceae;g__Escherichia;s__Escherichia flexneri	GCF_002950215.1	97.0028	d__Bacteria;p__Proteobacteria;c__Gammaproteobacteria;o__Enterobacterales;f__Enterobacteriaceae;g__Escherichia;s__Escherichia flexneri	97.72	0.81	GCF_002949675.1	97.0028	d__Bacteria;p__Proteobacteria;c__Gammaproteobacteria;o__Enterobacterales;f__Enterobacteriaceae;g__Escherichia;s__Escherichia dysenteriae	96.93	0.77	d__Bacteria;p__Proteobacteria;c__Gammaproteobacteria;o__Enterobacterales;f__Enterobacteriaceae;g__Escherichia;s__	ANI	topological placement and ANI have incongruent species assignments	GCF_000026325.1, s__Escherichia coli_D, 96.9551, 97.3, 0.84; GCF_003697165.2, s__Escherichia coli, 96.8144, 96.86, 0.83; GCA_003018335.1, s__Escherichia coli_C, 96.1333, 96.11, 0.84; GCF_002965065.1, s__Escherichia sp002965065, 95.0, 94.37, 0.72; GCF_004211955.1, s__Escherichia sp004211955, 95.0, 92.8, 0.8; GCF_005843885.1, s__Escherichia sp005843885, 95.0, 92.7, 0.81; GCF_000208585.1, s__Escheri…	48.98
SHASGE2bin.12	SH_SHASGE2	cultivable	86.88	6.949	9.06016	0.998591	d__Bacteria;p__Proteobacteria;c__Gammaproteobacteria;o__Xanthomonadales;f__Xanthomonadaceae;g__Xanthomonas_B;s__	N/A	N/A	N/A	N/A	N/A	GCA_003449195.1	95	d__Bacteria;p__Proteobacteria;c__Gammaproteobacteria;o__Xanthomonadales;f__Xanthomonadaceae;g__Xanthomonas_B;s__Xanthomonas_B sp003449195	95.7	0.58	d__Bacteria;p__Proteobacteria;c__Gammaproteobacteria;o__Xanthomonadales;f__Xanthomonadaceae;g__Xanthomonas_B;s__	taxonomic classification defined by topology and ANI	N/A	GCF_900018785.1, s__Xanthomonas_B massiliensis, 95.0, 83.67, 0.75	64.4
SHASGE2bin.14	SH_SHASGE2	cultivable	87.42	7.205	16.1781	N/A	d__Bacteria;p__Campylobacterota;c__Campylobacteria;o__Campylobacterales;f__Sulfurospirillaceae;g__Sulfurospirillum;s__Sulfurospirillum sp001548035	GCF_001548035.1	95	d__Bacteria;p__Campylobacterota;c__Campylobacteria;o__Campylobacterales;f__Sulfurospirillaceae;g__Sulfurospirillum;s__Sulfurospirillum sp001548035	96.94	0.9	GCF_001548035.1	95	d__Bacteria;p__Campylobacterota;c__Campylobacteria;o__Campylobacterales;f__Sulfurospirillaceae;g__Sulfurospirillum;s__Sulfurospirillum sp001548035	96.94	0.9	d__Bacteria;p__Campylobacterota;c__Campylobacteria;o__Campylobacterales;f__Sulfurospirillaceae;g__Sulfurospirillum;s__	taxonomic classification defined by topology and ANI	topological placement and ANI have congruent species assignments	GCF_000813345.1, s__Sulfurospirillum arsenophilum, 95.0, 82.06, 0.76; GCF_001723605.1, s__Sulfurospirillum halorespirans, 95.0, 81.14, 0.64; GCF_002162315.1, s__Sulfurospirillum sp002162315, 95.0, 81.06, 0.69; GCF_002309535.1, s__Sulfurospirillum sp002309535, 95.0, 80.93, 0.67; GCF_000568815.1, s__Sulfurospirillum multivorans, 95.0, 80.89, 0.63; GCA_000743525.1, s__Sulfurospirillum sp000743525, 9…	70.44
SHASGE2bin.15	SH_SHASGE2	cultivable	69.56	1.715	9.96966	0.985247	d__Bacteria;p__Bacteroidota;c__Bacteroidia;o__Flavobacteriales;f__Weeksellaceae;g__Cloacibacterium;s__	N/A	N/A	N/A	N/A	N/A	N/A	N/A	N/A	N/A	N/A	d__Bacteria;p__Bacteroidota;c__Bacteroidia;o__Flavobacteriales;f__Weeksellaceae;g__Cloacibacterium;s__	ANI	N/A	GCA_002422665.1, s__Cloacibacterium sp002422665, 95.0, 84.0, 0.55; GCF_003860565.1, s__Cloacibacterium normanense, 95.0, 83.84, 0.63; GCA_002337005.1, s__Cloacibacterium sp002337005, 95.0, 82.04, 0.58; GCA_014645495.1, s__Cloacibacterium rupense, 95.0, 81.59, 0.59	56.8
SHASGE2bin.16	SH_SHASGE2	cultivable	99.37	0.311	33.338	0.957942	d__Bacteria;p__Proteobacteria;c__Gammaproteobacteria;o__Burkholderiales;f__Burkholderiaceae;g__Aquabacterium;s__	N/A	N/A	N/A	N/A	N/A	N/A	N/A	N/A	N/A	N/A	d__Bacteria;p__Proteobacteria;c__Gammaproteobacteria;o__Burkholderiales;f__Burkholderiaceae;g__Aquabacterium;s__	ANI	N/A	GCF_000768065.1, s__Aquabacterium sp000768065, 95.0, 80.93, 0.53; GCF_005502875.1, s__Aquabacterium sp005502875, 95.0, 80.83, 0.46; GCF_001447195.1, s__Aquabacterium parvum, 95.0, 80.75, 0.47; GCF_003100395.1, s__Aquabacterium olei, 95.0, 80.74, 0.47; GCA_001770775.1, s__Aquabacterium sp001770775, 95.0, 80.68, 0.43; GCA_001770725.1, s__Aquabacterium sp001770725, 95.0, 80.61, 0.48; GCF_004310865.1…	96.84
SHASGE2bin.17	SH_SHASGE2	cultivable	87.32	6.259	19.1022	0.979544	d__Bacteria;p__Proteobacteria;c__Gammaproteobacteria;o__Burkholderiales;f__Rhodocyclaceae;g__Azonexus;s__	N/A	N/A	N/A	N/A	N/A	GCF_000012425.1	95	d__Bacteria;p__Proteobacteria;c__Gammaproteobacteria;o__Burkholderiales;f__Rhodocyclaceae;g__Azonexus;s__Azonexus aromaticus_A	87.81	0.8	d__Bacteria;p__Proteobacteria;c__Gammaproteobacteria;o__Burkholderiales;f__Rhodocyclaceae;g__Azonexus;s__	taxonomic classification defined by topology and ANI	N/A	GCA_013335535.1, s__Azonexus sp013335535, 95.0, 83.71, 0.66; GCA_008080565.1, s__Azonexus sp008080565, 95.0, 83.49, 0.68; GCA_002840785.1, s__Azonexus sp002840785, 95.0, 83.45, 0.62; GCA_903922075.1, s__Azonexus sp903922075, 95.0, 83.4, 0.6; GCF_000519045.1, s__Azonexus agitatus, 95.0, 83.22, 0.64; GCF_009469765.1, s__Azonexus hortensis, 95.0, 82.89, 0.65; GCA_002842145.1, s__Azonexus sp002842145…	71.63
SHASGE2bin.19	SH_SHASGE2	cultivable	99.13	0.498	112.923	0.955653	d__Bacteria;p__Proteobacteria;c__Gammaproteobacteria;o__Burkholderiales;f__Rhodocyclaceae;g__Azonexus;s__	N/A	N/A	N/A	N/A	N/A	N/A	N/A	N/A	N/A	N/A	d__Bacteria;p__Proteobacteria;c__Gammaproteobacteria;o__Burkholderiales;f__Rhodocyclaceae;g__Azonexus;s__	taxonomic classification defined by topology and ANI	N/A	GCF_003634965.1, s__Azonexus fungiphilus, 95.0, 86.92, 0.68; GCA_002425245.1, s__Azonexus sp002425245, 95.0, 86.76, 0.69; GCF_000429605.1, s__Azonexus hydrophilus, 95.0, 86.02, 0.7; GCA_002470165.1, s__Azonexus sp002470165, 95.0, 85.48, 0.75; GCF_001956855.1, s__Azonexus hydrophilus_A, 95.0, 84.46, 0.67; GCA_008933675.1, s__Azonexus sp008933675, 95.0, 83.85, 0.53; GCF_009469585.1, s__Azonexus sp0…	96.25
SHASGE2bin.2	SH_SHASGE2	cultivable	100	0.609	16.0511	N/A	d__Bacteria;p__Campylobacterota;c__Campylobacteria;o__Campylobacterales;f__Arcobacteraceae;g__Aliarcobacter;s__Aliarcobacter butzleri	GCF_900187115.1	95	d__Bacteria;p__Campylobacterota;c__Campylobacteria;o__Campylobacterales;f__Arcobacteraceae;g__Aliarcobacter;s__Aliarcobacter butzleri	97.62	0.91	GCF_900187115.1	95	d__Bacteria;p__Campylobacterota;c__Campylobacteria;o__Campylobacterales;f__Arcobacteraceae;g__Aliarcobacter;s__Aliarcobacter butzleri	97.62	0.91	d__Bacteria;p__Campylobacterota;c__Campylobacteria;o__Campylobacterales;f__Arcobacteraceae;g__Aliarcobacter;s__	taxonomic classification defined by topology and ANI	topological placement and ANI have congruent species assignments	GCF_003063295.1, s__Aliarcobacter sp003063295, 95.0, 94.98, 0.85; GCF_003544915.1, s__Aliarcobacter ellisii, 95.0, 84.49, 0.76; GCF_013201725.1, s__Aliarcobacter defluvii, 95.0, 84.26, 0.77; GCF_013177635.1, s__Aliarcobacter aquimarinus, 95.0, 83.37, 0.73; GCF_013201935.1, s__Aliarcobacter cloacae, 95.0, 83.2, 0.72; GCF_003316695.1, s__Aliarcobacter sp003316695, 95.0, 82.92, 0.7; GCF_003544815.1,…	93.11
SHASGE2bin.20	SH_SHASGE2	cultivable	53.38	0.853	6.839	N/A	d__Bacteria;p__Campylobacterota;c__Campylobacteria;o__Campylobacterales;f__Arcobacteraceae;g__Aliarcobacter;s__Aliarcobacter cryaerophilus_A	GCF_014352935.1	95	d__Bacteria;p__Campylobacterota;c__Campylobacteria;o__Campylobacterales;f__Arcobacteraceae;g__Aliarcobacter;s__Aliarcobacter cryaerophilus_A	98.14	0.65	GCF_014352935.1	95	d__Bacteria;p__Campylobacterota;c__Campylobacteria;o__Campylobacterales;f__Arcobacteraceae;g__Aliarcobacter;s__Aliarcobacter cryaerophilus_A	98.14	0.65	d__Bacteria;p__Campylobacterota;c__Campylobacteria;o__Campylobacterales;f__Arcobacteraceae;g__Aliarcobacter;s__	taxonomic classification defined by topology and ANI	topological placement and ANI have congruent species assignments	GCF_003660105.1, s__Aliarcobacter cryaerophilus, 95.0, 92.94, 0.68; GCF_002993025.1, s__Aliarcobacter cryaerophilus_B, 95.0, 91.77, 0.7; GCF_003355515.1, s__Aliarcobacter trophiarum, 95.0, 87.4, 0.65; GCF_003544835.1, s__Aliarcobacter skirrowii, 95.0, 87.36, 0.6; GCF_013201705.1, s__Aliarcobacter faecis, 95.0, 84.45, 0.64; GCF_013372265.1, s__Aliarcobacter cibarius, 95.0, 84.22, 0.6; GCF_00331669…	41.91
SHASGE2bin.22	SH_SHASGE2	cultivable	94.35	0.092	59.8772	0.94338	d__Bacteria;p__Proteobacteria;c__Gammaproteobacteria;o__Burkholderiales;f__Rhodocyclaceae;g__Azonexus;s__	N/A	N/A	N/A	N/A	N/A	GCA_004379165.1	95	d__Bacteria;p__Proteobacteria;c__Gammaproteobacteria;o__Burkholderiales;f__Rhodocyclaceae;g__Azonexus;s__Azonexus sp004379165	81.5	0.57	d__Bacteria;p__Proteobacteria;c__Gammaproteobacteria;o__Burkholderiales;f__Rhodocyclaceae;g__Azonexus;s__	taxonomic classification defined by topology and ANI	N/A	GCF_000519045.1, s__Azonexus agitatus, 95.0, 82.44, 0.61; GCF_009469615.1, s__Azonexus sp009469615, 95.0, 82.15, 0.56; GCF_009469585.1, s__Azonexus sp009469585, 95.0, 82.0, 0.57; GCF_008711155.1, s__Azonexus sp008711155, 95.0, 81.95, 0.58; GCF_000429605.1, s__Azonexus hydrophilus, 95.0, 81.8, 0.53; GCF_003634965.1, s__Azonexus fungiphilus, 95.0, 81.74, 0.54; GCA_008933675.1, s__Azonexus sp0089336…	80.31
SHASGE2bin.23	SH_SHASGE2	cultivable	65.63	4.077	75.7863	N/A	d__Bacteria;p__Proteobacteria;c__Gammaproteobacteria;o__Burkholderiales;f__Burkholderiaceae;g__Giesbergeria;s__Giesbergeria sp010020825	GCF_010020825.1	95	d__Bacteria;p__Proteobacteria;c__Gammaproteobacteria;o__Burkholderiales;f__Burkholderiaceae;g__Giesbergeria;s__Giesbergeria sp010020825	98.07	0.95	GCF_010020825.1	95	d__Bacteria;p__Proteobacteria;c__Gammaproteobacteria;o__Burkholderiales;f__Burkholderiaceae;g__Giesbergeria;s__Giesbergeria sp010020825	98.07	0.95	d__Bacteria;p__Proteobacteria;c__Gammaproteobacteria;o__Burkholderiales;f__Burkholderiaceae;g__Giesbergeria;s__	taxonomic classification defined by topology and ANI	topological placement and ANI have congruent species assignments	GCF_003604195.1, s__Giesbergeria lacusdiani, 95.0, 86.05, 0.85; GCF_000739995.1, s__Giesbergeria granuli, 95.0, 85.37, 0.84; GCA_001770955.1, s__Giesbergeria sp001770955, 95.0, 84.72, 0.8; GCF_003096555.1, s__Giesbergeria sp003096555, 95.0, 82.21, 0.78; GCF_012932145.1, s__Giesbergeria sp012932145, 95.0, 82.05, 0.68; GCF_004341365.1, s__Giesbergeria metamorpha, 95.0, 81.46, 0.66; GCA_001724785.1,…	58.43
SHASGE2bin.24	SH_SHASGE2	cultivable	52.03	1.724	26.3238	N/A	d__Bacteria;p__Proteobacteria;c__Gammaproteobacteria;o__Enterobacterales;f__Enterobacteriaceae;g__Klebsiella;s__Klebsiella variicola	GCF_000828055.2	95	d__Bacteria;p__Proteobacteria;c__Gammaproteobacteria;o__Enterobacterales;f__Enterobacteriaceae;g__Klebsiella;s__Klebsiella variicola	99.38	0.95	GCF_000828055.2	95	d__Bacteria;p__Proteobacteria;c__Gammaproteobacteria;o__Enterobacterales;f__Enterobacteriaceae;g__Klebsiella;s__Klebsiella variicola	99.38	0.95	d__Bacteria;p__Proteobacteria;c__Gammaproteobacteria;o__Enterobacterales;f__Enterobacteriaceae;g__Klebsiella;s__	taxonomic classification defined by topology and ANI	topological placement and ANI have congruent species assignments	GCF_000742135.1, s__Klebsiella pneumoniae, 95.0, 94.26, 0.85; GCF_002269255.1, s__Klebsiella quasivariicola, 95.0, 93.74, 0.88; GCF_000751755.1, s__Klebsiella quasipneumoniae, 95.0, 93.33, 0.86; GCF_000215745.1, s__Klebsiella aerogenes, 95.0, 86.22, 0.76	42.23
SHASGE2bin.3	SH_SHASGE2	cultivable	63.56	8.942	9.62875	0.992614	d__Bacteria;p__Bacteroidota;c__Bacteroidia;o__Bacteroidales;f__Bacteroidaceae;g__Bacteroides;s__	N/A	N/A	N/A	N/A	N/A	GCF_007896885.1	95	d__Bacteria;p__Bacteroidota;c__Bacteroidia;o__Bacteroidales;f__Bacteroidaceae;g__Bacteroides;s__Bacteroides sp007896885	92.92	0.64	d__Bacteria;p__Bacteroidota;c__Bacteroidia;o__Bacteroidales;f__Bacteroidaceae;g__Bacteroides;s__	taxonomic classification defined by topology and ANI	N/A	GCF_000428125.1, s__Bacteroides graminisolvens, 95.0, 90.21, 0.19; GCA_900766195.1, s__Bacteroides sp900766195, 95.0, 79.82, 0.26; GCA_900765785.1, s__Bacteroides sp900765785, 95.0, 79.14, 0.1; GCA_009929715.1, s__Bacteroides sp009929715, 95.0, 78.34, 0.08; GCF_000381365.1, s__Bacteroides salyersiae, 95.0, 78.1, 0.09; GCF_002222615.2, s__Bacteroides caccae, 95.0, 78.06, 0.09; GCF_000172175.1, s__…	55.45
SHASGE2bin.4	SH_SHASGE2	cultivable	60.47	0.761	11.3978	0.93865	d__Bacteria;p__Proteobacteria;c__Gammaproteobacteria;o__Burkholderiales;f__Burkholderiaceae;g__Aquabacterium;s__	N/A	N/A	N/A	N/A	N/A	GCA_004322345.1	95	d__Bacteria;p__Proteobacteria;c__Gammaproteobacteria;o__Burkholderiales;f__Burkholderiaceae;g__Aquabacterium;s__Aquabacterium sp004322345	80.17	0.51	d__Bacteria;p__Proteobacteria;c__Gammaproteobacteria;o__Burkholderiales;f__Burkholderiaceae;g__Aquabacterium;s__	taxonomic classification defined by topology and ANI	N/A	GCF_004310865.1, s__Aquabacterium sp004310865, 95.0, 80.59, 0.42; GCA_001770725.1, s__Aquabacterium sp001770725, 95.0, 80.56, 0.49; GCF_001447195.1, s__Aquabacterium parvum, 95.0, 80.54, 0.46; GCF_004362855.1, s__Aquabacterium commune, 95.0, 80.47, 0.46; GCF_000768065.1, s__Aquabacterium sp000768065, 95.0, 80.46, 0.48; GCF_005502875.1, s__Aquabacterium sp005502875, 95.0, 80.46, 0.48; GCF_00393373…	58.94
SHASGE2bin.5	SH_SHASGE2	cultivable	98.42	0.829	21.587	0.979754	d__Bacteria;p__Proteobacteria;c__Gammaproteobacteria;o__Burkholderiales;f__Rhodocyclaceae;g__Zoogloea;s__	N/A	N/A	N/A	N/A	N/A	GCF_006539865.1	95	d__Bacteria;p__Proteobacteria;c__Gammaproteobacteria;o__Burkholderiales;f__Rhodocyclaceae;g__Zoogloea;s__Zoogloea ramigera	90.13	0.81	d__Bacteria;p__Proteobacteria;c__Gammaproteobacteria;o__Burkholderiales;f__Rhodocyclaceae;g__Zoogloea;s__	taxonomic classification defined by topology and ANI	N/A	GCF_009469605.1, s__Zoogloea sp009469605, 95.0, 85.3, 0.71; GCA_009026175.1, s__Zoogloea sp009026175, 95.0, 83.6, 0.61; GCF_012927165.1, s__Zoogloea sp012927165, 95.0, 83.46, 0.68; GCF_002028455.1, s__Zoogloea sp002028455, 95.0, 83.12, 0.61; GCF_008107625.1, s__Zoogloea oleivorans, 95.0, 82.99, 0.63; GCA_008011925.1, s__Zoogloea sp008011925, 95.0, 81.86, 0.55	91.34
SHASGE2bin.6	SH_SHASGE2	cultivable	89.1	2.251	30.3972	N/A	d__Bacteria;p__Proteobacteria;c__Gammaproteobacteria;o__Burkholderiales;f__Rhodocyclaceae;g__Azonexus;s__Azonexus agitatus	GCF_000519045.1	95	d__Bacteria;p__Proteobacteria;c__Gammaproteobacteria;o__Burkholderiales;f__Rhodocyclaceae;g__Azonexus;s__Azonexus agitatus	98.26	0.89	GCF_000519045.1	95	d__Bacteria;p__Proteobacteria;c__Gammaproteobacteria;o__Burkholderiales;f__Rhodocyclaceae;g__Azonexus;s__Azonexus agitatus	98.26	0.89	d__Bacteria;p__Proteobacteria;c__Gammaproteobacteria;o__Burkholderiales;f__Rhodocyclaceae;g__Azonexus;s__	taxonomic classification defined by topology and ANI	topological placement and ANI have congruent species assignments	GCF_008711155.1, s__Azonexus sp008711155, 95.0, 83.8, 0.7; GCF_009469585.1, s__Azonexus sp009469585, 95.0, 83.1, 0.65; GCF_009469615.1, s__Azonexus sp009469615, 95.0, 82.76, 0.62; GCA_903922075.1, s__Azonexus sp903922075, 95.0, 82.69, 0.52; GCF_001551835.1, s__Azonexus denitrificans, 95.0, 82.36, 0.66; GCF_009469765.1, s__Azonexus hortensis, 95.0, 82.29, 0.67; GCF_003634965.1, s__Azonexus fungiph…	57.51
SHASGE2bin.7	SH_SHASGE2	cultivable	89.52	0.108	179.775	N/A	d__Bacteria;p__Proteobacteria;c__Gammaproteobacteria;o__Pseudomonadales;f__Pseudomonadaceae;g__Pseudomonas_E;s__Pseudomonas_E alcaligenes	GCF_000467105.1	95	d__Bacteria;p__Proteobacteria;c__Gammaproteobacteria;o__Pseudomonadales;f__Pseudomonadaceae;g__Pseudomonas_E;s__Pseudomonas_E alcaligenes	96.77	0.92	GCF_000467105.1	95	d__Bacteria;p__Proteobacteria;c__Gammaproteobacteria;o__Pseudomonadales;f__Pseudomonadaceae;g__Pseudomonas_E;s__Pseudomonas_E alcaligenes	96.77	0.92	d__Bacteria;p__Proteobacteria;c__Gammaproteobacteria;o__Pseudomonadales;f__Pseudomonadaceae;g__Pseudomonas_E;s__	taxonomic classification defined by topology and ANI	topological placement and ANI have congruent species assignments	GCF_900156545.1, s__Pseudomonas_E alcaligenes_A, 95.0, 94.48, 0.87; GCF_003205495.1, s__Pseudomonas_E alcaligenes_B, 95.0, 91.44, 0.83; GCF_005508865.1, s__Pseudomonas_E sp005508865, 95.0, 89.45, 0.84; GCF_000761545.1, s__Pseudomonas_E sp000761545, 95.0, 88.8, 0.82; GCA_002483005.1, s__Pseudomonas_E sp002483005, 95.0, 87.97, 0.64; GCF_014490745.1, s__Pseudomonas_E alcaligenes_C, 95.0, 87.28, 0.8;…	75.42
SHASGE2bin.8	SH_SHASGE2	cultivable	95.61	1.345	9.80595	0.955609	d__Bacteria;p__Acidobacteriota;c__Holophagae;o__Holophagales;f__Holophagaceae;g__Holophaga;s__	N/A	N/A	N/A	N/A	N/A	GCA_903868115.1	95	d__Bacteria;p__Acidobacteriota;c__Holophagae;o__Holophagales;f__Holophagaceae;g__Holophaga;s__Holophaga sp903868115	80.41	0.47	d__Bacteria;p__Acidobacteriota;c__Holophagae;o__Holophagales;f__Holophagaceae;g__Holophaga;s__	taxonomic classification defined by topology and ANI	N/A	GCA_002068835.1, s__Holophaga sp002068835, 95.0, 79.82, 0.48; GCA_002298155.1, s__Holophaga sp002298155, 95.0, 78.58, 0.31; GCA_002297665.1, s__Holophaga sp002297665, 95.0, 78.42, 0.32; GCF_000242615.2, s__Holophaga foetida, 95.0, 78.32, 0.27; GCA_003165415.1, s__Holophaga sp003165415, 95.0, 78.21, 0.32; GCA_002319925.1, s__Holophaga sp002319925, 95.0, 78.06, 0.24	85.98
SHASGE2bin.9	SH_SHASGE2	cultivable	75.61	9.972	38.9141	N/A	d__Bacteria;p__Bacteroidota;c__Bacteroidia;o__Bacteroidales;f__Tannerellaceae;g__Macellibacteroides;s__Macellibacteroides fermentans	GCF_013409575.1	95	d__Bacteria;p__Bacteroidota;c__Bacteroidia;o__Bacteroidales;f__Tannerellaceae;g__Macellibacteroides;s__Macellibacteroides fermentans	96.58	0.87	GCF_013409575.1	95	d__Bacteria;p__Bacteroidota;c__Bacteroidia;o__Bacteroidales;f__Tannerellaceae;g__Macellibacteroides;s__Macellibacteroides fermentans	96.58	0.87	d__Bacteria;p__Bacteroidota;c__Bacteroidia;o__Bacteroidales;f__Tannerellaceae;g__;s__	taxonomic classification defined by topology and ANI	topological placement and ANI have congruent species assignments	N/A	60.08
SHASGE3bin.1	SH_SHASGE3	uncultivable	67.85	2.372	5.49201	0.988457	d__Bacteria;p__Proteobacteria;c__Alphaproteobacteria;o__Caulobacterales;f__Hyphomonadaceae;g__Terricaulis;s__	N/A	N/A	N/A	N/A	N/A	GCF_001679665.1	95	d__Bacteria;p__Proteobacteria;c__Alphaproteobacteria;o__Caulobacterales;f__Hyphomonadaceae;g__Terricaulis;s__Terricaulis sp001679665	81.5	0.77	d__Bacteria;p__Proteobacteria;c__Alphaproteobacteria;o__Caulobacterales;f__Hyphomonadaceae;g__Terricaulis;s__	taxonomic classification defined by topology and ANI	N/A	GCA_902826145.1, s__Terricaulis sp902826145, 95.0, 80.94, 0.71; GCA_002083515.1, s__Terricaulis sp002083515, 95.0, 80.56, 0.54; GCF_009792355.1, s__Terricaulis silvestris, 95.0, 80.15, 0.61; GCA_900696695.1, s__Terricaulis sp900696695, 95.0, 79.88, 0.61; GCA_001464425.1, s__Terricaulis sp001464425, 95.0, 79.79, 0.62; GCA_003242075.1, s__Terricaulis sp003242075, 95.0, 79.72, 0.63; GCF_004634425.1,…	56.9
SHASGE3bin.10	SH_SHASGE3	uncultivable	58.17	0.497	8.71832	N/A	d__Bacteria;p__Proteobacteria;c__Alphaproteobacteria;o__Rhodospirillales;f__UXAT02;g__Defluviicoccus;s__Defluviicoccus seviourii	GCA_900609035.2	95	d__Bacteria;p__Proteobacteria;c__Alphaproteobacteria;o__Rhodospirillales;f__UXAT02;g__Defluviicoccus;s__Defluviicoccus seviourii	95.61	0.92	GCA_900609035.2	95	d__Bacteria;p__Proteobacteria;c__Alphaproteobacteria;o__Rhodospirillales;f__UXAT02;g__Defluviicoccus;s__Defluviicoccus seviourii	95.61	0.92	d__Bacteria;p__Proteobacteria;c__Alphaproteobacteria;o__Rhodospirillales;f__UXAT02;g__;s__	taxonomic classification defined by topology and ANI	topological placement and ANI have congruent species assignments	N/A	49.67
SHASGE3bin.11	SH_SHASGE3	uncultivable	50.6	1.028	18.3978	0.823418	d__Bacteria;p__Patescibacteria;c__Saccharimonadia;o__CAILAD01;f__CAILAD01;g__;s__	N/A	N/A	N/A	N/A	N/A	N/A	N/A	N/A	N/A	N/A	d__Bacteria;p__Patescibacteria;c__Saccharimonadia;o__CAILAD01;f__;g__;s__	taxonomic novelty determined using RED	N/A	N/A	53.96
SHASGE3bin.12	SH_SHASGE3	uncultivable	62.17	1.98	9.68189	0.841086	d__Bacteria;p__Patescibacteria;c__Paceibacteria;o__UBA9983_A;f__UBA2163;g__;s__	N/A	N/A	N/A	N/A	N/A	N/A	N/A	N/A	N/A	N/A	d__Bacteria;p__Patescibacteria;c__Paceibacteria;o__UBA9983_A;f__UBA2163;g__;s__	taxonomic novelty determined using RED	N/A	N/A	59.62
SHASGE3bin.13	SH_SHASGE3	uncultivable	97.43	4.843	10.4578	0.944887	d__Bacteria;p__Cyanobacteria;c__Vampirovibrionia;o__Obscuribacterales;f__Obscuribacteraceae;g__Obscuribacter;s__	N/A	N/A	N/A	N/A	N/A	GCA_001899315.1	95	d__Bacteria;p__Cyanobacteria;c__Vampirovibrionia;o__Obscuribacterales;f__Obscuribacteraceae;g__Obscuribacter;s__Obscuribacter phosphatis	78.57	0.22	d__Bacteria;p__Cyanobacteria;c__Vampirovibrionia;o__Obscuribacterales;f__Obscuribacteraceae;g__;s__	taxonomic classification defined by topology and ANI	N/A	N/A	89.52
SHASGE3bin.14	SH_SHASGE3	uncultivable	52.39	0.478	4.75699	0.970258	d__Bacteria;p__Proteobacteria;c__Gammaproteobacteria;o__Methylococcales;f__Methylomonadaceae;g__KS41;s__	N/A	N/A	N/A	N/A	N/A	GCA_002256705.1	95	d__Bacteria;p__Proteobacteria;c__Gammaproteobacteria;o__Methylococcales;f__Methylomonadaceae;g__KS41;s__KS41 sp002256705	84.16	0.51	d__Bacteria;p__Proteobacteria;c__Gammaproteobacteria;o__Methylococcales;f__Methylomonadaceae;g__KS41;s__	taxonomic classification defined by topology and ANI	N/A	GCA_002256465.1, s__KS41 sp002256465, 95.0, 83.76, 0.43; GCA_002862125.1, s__KS41 sp002862125, 95.0, 81.32, 0.66; GCA_003158415.1, s__KS41 sp003158415, 95.0, 79.67, 0.43; GCA_903839795.1, s__KS41 sp903839795, 95.0, 79.63, 0.42; GCA_903873045.1, s__KS41 sp903873045, 95.0, 79.49, 0.47; GCA_903903365.1, s__KS41 sp903903365, 95.0, 79.31, 0.49; GCA_903939355.1, s__KS41 sp903939355, 95.0, 77.6, 0.21; G…	40.42
SHASGE3bin.15	SH_SHASGE3	uncultivable	73.98	0	11.018	0.792094	d__Bacteria;p__Patescibacteria;c__Gracilibacteria;o__Absconditabacterales;f__X112;g__;s__	N/A	N/A	N/A	N/A	N/A	GCA_007115995.1	95	d__Bacteria;p__Patescibacteria;c__Gracilibacteria;o__Absconditabacterales;f__X112;g__SKJI01;s__SKJI01 sp007115995	79.18	0.03	d__Bacteria;p__Patescibacteria;c__Gracilibacteria;o__Absconditabacterales;f__X112;g__;s__	taxonomic classification defined by topology and ANI	N/A	N/A	63.67
SHASGE3bin.16	SH_SHASGE3	uncultivable	59.45	0	6.77087	0.917323	d__Bacteria;p__Proteobacteria;c__Gammaproteobacteria;o__GCA-2729495;f__GCA-2729495;g__SHZI01;s__	N/A	N/A	N/A	N/A	N/A	GCA_009692345.1	95	d__Bacteria;p__Proteobacteria;c__Gammaproteobacteria;o__GCA-2729495;f__GCA-2729495;g__SHZI01;s__SHZI01 sp009692345	76.89	0.2	d__Bacteria;p__Proteobacteria;c__Gammaproteobacteria;o__GCA-2729495;f__GCA-2729495;g__;s__	taxonomic classification defined by topology and ANI	N/A	N/A	59.12
SHASGE3bin.17	SH_SHASGE3	uncultivable	97.67	4.545	34.7283	0.783944	d__Bacteria;p__Nitrospirota;c__Nitrospiria;o__Nitrospirales;f__Nitrospiraceae;g__;s__	N/A	N/A	N/A	N/A	N/A	N/A	N/A	N/A	N/A	N/A	d__Bacteria;p__Nitrospirota;c__Nitrospiria;o__Nitrospirales;f__Nitrospiraceae;g__;s__	taxonomic classification fully defined by topology	N/A	N/A	95.83
SHASGE3bin.18	SH_SHASGE3	uncultivable	72.01	8.396	5.57393	0.880479	d__Bacteria;p__Bacteroidota;c__Bacteroidia;o__AKYH767;f__Palsa-948;g__;s__	N/A	N/A	N/A	N/A	N/A	N/A	N/A	N/A	N/A	N/A	d__Bacteria;p__Bacteroidota;c__Bacteroidia;o__AKYH767;f__Palsa-948;g__;s__	taxonomic novelty determined using RED	N/A	N/A	52
SHASGE3bin.19	SH_SHASGE3	uncultivable	73.38	4.285	32.3253	0.887433	d__Bacteria;p__Bacteroidota;c__Bacteroidia;o__AKYH767-A;f__2013-40CM-41-45;g__CAINVI01;s__	N/A	N/A	N/A	N/A	N/A	GCA_903854075.1	95	d__Bacteria;p__Bacteroidota;c__Bacteroidia;o__AKYH767-A;f__2013-40CM-41-45;g__CAINVI01;s__CAINVI01 sp903854075	76.37	0.05	d__Bacteria;p__Bacteroidota;c__Bacteroidia;o__AKYH767-A;f__2013-40CM-41-45;g__;s__	taxonomic classification defined by topology and ANI	N/A	N/A	71.05
SHASGE3bin.20	SH_SHASGE3	uncultivable	89.3	2.339	6.75634	0.978685	d__Bacteria;p__Bacteroidota;c__Bacteroidia;o__Chitinophagales;f__Chitinophagaceae;g__Ferruginibacter;s__	N/A	N/A	N/A	N/A	N/A	GCA_002381005.1	95	d__Bacteria;p__Bacteroidota;c__Bacteroidia;o__Chitinophagales;f__Chitinophagaceae;g__Ferruginibacter;s__Ferruginibacter sp002381005	80.83	0.8	d__Bacteria;p__Bacteroidota;c__Bacteroidia;o__Chitinophagales;f__Chitinophagaceae;g__Ferruginibacter;s__	taxonomic classification defined by topology and ANI	N/A	GCA_002352045.1, s__Ferruginibacter sp002352045, 95.0, 77.56, 0.22; GCA_001898465.1, s__Ferruginibacter sp001898465, 95.0, 76.78, 0.2; GCA_002336815.1, s__Ferruginibacter sp002336815, 95.0, 76.54, 0.04; GCA_014379905.1, s__Ferruginibacter sp014379905, 95.0, 76.27, 0.15; GCA_013141115.1, s__Ferruginibacter sp013141115, 95.0, 76.24, 0.18; GCA_903878475.1, s__Ferruginibacter sp903878475, 95.0, 76.07…	84.51
SHASGE3bin.21	SH_SHASGE3	uncultivable	84.31	1.465	11.8218	0.932231	d__Bacteria;p__Krumholzibacteriota;c__Krumholzibacteria;o__LZORAL124-64-63;f__LZORAL124-64-63;g__CAINDZ01;s__	N/A	N/A	N/A	N/A	N/A	N/A	N/A	N/A	N/A	N/A	d__Bacteria;p__Krumholzibacteriota;c__Krumholzibacteria;o__LZORAL124-64-63;f__LZORAL124-64-63;g__;s__	taxonomic novelty determined using RED	N/A	N/A	77.76
SHASGE3bin.22	SH_SHASGE3	uncultivable	72.31	3.85	6.39106	0.897597	d__Bacteria;p__Proteobacteria;c__Alphaproteobacteria;o__Rhizobiales;f__Xanthobacteraceae;g__;s__	N/A	N/A	N/A	N/A	N/A	N/A	N/A	N/A	N/A	N/A	d__Bacteria;p__Proteobacteria;c__Alphaproteobacteria;o__Rhizobiales;f__Xanthobacteraceae;g__;s__	taxonomic novelty determined using RED	N/A	N/A	60.87
SHASGE3bin.23	SH_SHASGE3	uncultivable	65.24	0	6.85623	0.662633	d__Bacteria;p__Myxococcota;c__Polyangia;o__Palsa-1104;f__;g__;s__	N/A	N/A	N/A	N/A	N/A	N/A	N/A	N/A	N/A	N/A	d__Bacteria;p__Myxococcota;c__Polyangia;o__Palsa-1104;f__;g__;s__	taxonomic novelty determined using RED	N/A	N/A	57.85
SHASGE3bin.24	SH_SHASGE3	uncultivable	62.87	0	8.35227	0.846069	d__Bacteria;p__Patescibacteria;c__Paceibacteria;o__Moranbacterales;f__UBA1568;g__;s__	N/A	N/A	N/A	N/A	N/A	GCA_008012175.1	95	d__Bacteria;p__Patescibacteria;c__Paceibacteria;o__Moranbacterales;f__UBA1568;g__SSEF01;s__SSEF01 sp008012175	77.45	0.07	d__Bacteria;p__Patescibacteria;c__Paceibacteria;o__Moranbacterales;f__UBA1568;g__;s__	taxonomic classification defined by topology and ANI	N/A	N/A	66.87
SHASGE3bin.25	SH_SHASGE3	uncultivable	51.09	9.404	9.70282	0.924074	d__Bacteria;p__Gemmatimonadota;c__Gemmatimonadetes;o__Gemmatimonadales;f__GWC2-71-9;g__SPDF01;s__	N/A	N/A	N/A	N/A	N/A	GCA_004525055.1	95	d__Bacteria;p__Gemmatimonadota;c__Gemmatimonadetes;o__Gemmatimonadales;f__GWC2-71-9;g__SPDF01;s__SPDF01 sp004525055	81.53	0.48	d__Bacteria;p__Gemmatimonadota;c__Gemmatimonadetes;o__Gemmatimonadales;f__GWC2-71-9;g__;s__	taxonomic classification defined by topology and ANI	N/A	N/A	32.16
SHASGE3bin.26	SH_SHASGE3	uncultivable	50.59	3.846	6.90642	0.806519	d__Bacteria;p__Patescibacteria;c__Saccharimonadia;o__Saccharimonadales;f__2-12-FULL-41-12;g__;s__	N/A	N/A	N/A	N/A	N/A	GCA_001790445.1	95	d__Bacteria;p__Patescibacteria;c__Saccharimonadia;o__Saccharimonadales;f__2-12-FULL-41-12;g__2-12-FULL-41-12;s__2-12-FULL-41-12 sp001790445	78.59	0.01	d__Bacteria;p__Patescibacteria;c__Saccharimonadia;o__Saccharimonadales;f__;g__;s__	taxonomic classification defined by topology and ANI	N/A	N/A	52.81
SHASGE3bin.27	SH_SHASGE3	uncultivable	85.26	3.07	9.19998	0.84302	d__Bacteria;p__Zixibacteria;c__MSB-5A5;o__GN15;f__FEB-12;g__;s__	N/A	N/A	N/A	N/A	N/A	GCA_003105265.1	95	d__Bacteria;p__Zixibacteria;c__MSB-5A5;o__GN15;f__FEB-12;g__FEB-12;s__FEB-12 sp003105265	76.33	0.11	d__Bacteria;p__Zixibacteria;c__MSB-5A5;o__GN15;f__FEB-12;g__;s__	taxonomic classification defined by topology and ANI	N/A	N/A	70.6
SHASGE3bin.28	SH_SHASGE3	uncultivable	60.9	6.161	4.58099	0.904621	d__Bacteria;p__Chloroflexota;c__Anaerolineae;o__Thermoflexales;f__Fen-1058;g__Fen-1058;s__	N/A	N/A	N/A	N/A	N/A	GCA_003154115.1	95	d__Bacteria;p__Chloroflexota;c__Anaerolineae;o__Thermoflexales;f__Fen-1058;g__Fen-1058;s__Fen-1058 sp003154115	77.64	0.39	d__Bacteria;p__Chloroflexota;c__Anaerolineae;o__Thermoflexales;f__;g__;s__	taxonomic classification defined by topology and ANI	N/A	N/A	42.82
SHASGE3bin.29	SH_SHASGE3	uncultivable	67.34	6.528	5.83172	0.924378	d__Bacteria;p__Proteobacteria;c__Gammaproteobacteria;o__Chromatiales;f__Chromatiaceae;g__M0108;s__	N/A	N/A	N/A	N/A	N/A	N/A	N/A	N/A	N/A	N/A	d__Bacteria;p__Proteobacteria;c__Gammaproteobacteria;o__Chromatiales;f__Chromatiaceae;g__;s__	taxonomic novelty determined using RED	N/A	N/A	48.1
SHASGE3bin.30	SH_SHASGE3	uncultivable	100	5.128	37.0171	0.736084	d__Bacteria;p__Actinobacteriota;c__Acidimicrobiia;o__Acidimicrobiales;f__;g__;s__	N/A	N/A	N/A	N/A	N/A	N/A	N/A	N/A	N/A	N/A	d__Bacteria;p__Actinobacteriota;c__Acidimicrobiia;o__Acidimicrobiales;f__;g__;s__	taxonomic novelty determined using RED	N/A	N/A	93.65
SHASGE3bin.31	SH_SHASGE3	uncultivable	51.12	6.397	4.67551	0.972765	d__Bacteria;p__Proteobacteria;c__Gammaproteobacteria;o__Burkholderiales;f__Burkholderiaceae;g__Rhodoferax;s__	N/A	N/A	N/A	N/A	N/A	N/A	N/A	N/A	N/A	N/A	d__Bacteria;p__Proteobacteria;c__Gammaproteobacteria;o__Burkholderiales;f__Burkholderiaceae;g__Rhodoferax;s__	ANI	N/A	GCF_002943465.1, s__Rhodoferax sp002943465, 95.0, 77.88, 0.15; GCA_903863395.1, s__Rhodoferax sp903863395, 95.0, 77.73, 0.16; GCA_903828665.1, s__Rhodoferax sp903828665, 95.0, 77.51, 0.08; GCA_903914985.1, s__Rhodoferax sp903914985, 95.0, 77.35, 0.07; GCF_000013605.1, s__Rhodoferax ferrireducens, 95.0, 77.29, 0.14; GCA_012927445.1, s__Rhodoferax sp012927445, 95.0, 77.29, 0.11; GCA_008015235.1, s_…	33.75
SHASGE3bin.32	SH_SHASGE3	uncultivable	86.8	3.934	7.17037	0.731583	d__Bacteria;p__Bacteroidota;c__SZUA-365;o__SZUA-365;f__SZUA-365;g__;s__	N/A	N/A	N/A	N/A	N/A	N/A	N/A	N/A	N/A	N/A	d__Bacteria;p__Bacteroidota;c__SZUA-365;o__SZUA-365;f__SZUA-365;g__;s__	taxonomic classification fully defined by topology	N/A	N/A	84.3
SHASGE3bin.33	SH_SHASGE3	uncultivable	55.85	2.272	11.917	N/A	d__Bacteria;p__Nitrospirota;c__Nitrospiria;o__Nitrospirales;f__Nitrospiraceae;g__Nitrospira_A;s__Nitrospira_A defluvii_A	GCF_000196815.1	95	d__Bacteria;p__Nitrospirota;c__Nitrospiria;o__Nitrospirales;f__Nitrospiraceae;g__Nitrospira_A;s__Nitrospira_A defluvii_A	98.29	0.92	GCF_000196815.1	95	d__Bacteria;p__Nitrospirota;c__Nitrospiria;o__Nitrospirales;f__Nitrospiraceae;g__Nitrospira_A;s__Nitrospira_A defluvii_A	98.29	0.92	d__Bacteria;p__Nitrospirota;c__Nitrospiria;o__Nitrospirales;f__Nitrospiraceae;g__Nitrospira_A;s__	taxonomic classification defined by topology and ANI	topological placement and ANI have congruent species assignments	GCF_900170025.1, s__Nitrospira_A sp900170025, 95.0, 92.68, 0.91; GCA_902500715.1, s__Nitrospira_A sp902500715, 95.0, 90.87, 0.77; GCA_902500785.1, s__Nitrospira_A sp902500785, 95.0, 82.47, 0.76; GCA_009594995.1, s__Nitrospira_A sp009594995, 95.0, 81.4, 0.67; GCA_014055465.1, s__Nitrospira_A sp014055465, 95.0, 80.09, 0.63; GCA_009594865.1, s__Nitrospira_A sp009594865, 95.0, 79.79, 0.54; GCA_011525…	47.41
SHASGE3bin.34	SH_SHASGE3	uncultivable	85.45	2.97	7.03102	0.848322	d__Bacteria;p__Bacteroidota;c__Bacteroidia;o__Chitinophagales;f__Saprospiraceae;g__;s__	N/A	N/A	N/A	N/A	N/A	GCA_003648285.1	95	d__Bacteria;p__Bacteroidota;c__Bacteroidia;o__Chitinophagales;f__Saprospiraceae;g__B8-G4;s__B8-G4 sp003648285	75.13	0.01	d__Bacteria;p__Bacteroidota;c__Bacteroidia;o__Chitinophagales;f__Saprospiraceae;g__;s__	taxonomic classification defined by topology and ANI	N/A	N/A	74.77
SHASGE3bin.35	SH_SHASGE3	uncultivable	61.16	1.298	4.6662	0.819878	d__Bacteria;p__Zixibacteria;c__MSB-5A5;o__CAIYYT01;f__CAIYYT01;g__;s__	N/A	N/A	N/A	N/A	N/A	N/A	N/A	N/A	N/A	N/A	d__Bacteria;p__Zixibacteria;c__MSB-5A5;o__CAIYYT01;f__;g__;s__	taxonomic novelty determined using RED	N/A	N/A	51.6
SHASGE3bin.36	SH_SHASGE3	uncultivable	96.87	1.111	9.48831	N/A	d__Bacteria;p__Bacteroidota;c__Bacteroidia;o__AKYH767;f__UBA4408;g__UBA4408;s__UBA4408 sp002389785	GCA_002389785.1	95	d__Bacteria;p__Bacteroidota;c__Bacteroidia;o__AKYH767;f__UBA4408;g__UBA4408;s__UBA4408 sp002389785	98.95	0.81	GCA_002389785.1	95	d__Bacteria;p__Bacteroidota;c__Bacteroidia;o__AKYH767;f__UBA4408;g__UBA4408;s__UBA4408 sp002389785	98.95	0.81	d__Bacteria;p__Bacteroidota;c__Bacteroidia;o__AKYH767;f__UBA4408;g__;s__	taxonomic classification defined by topology and ANI	topological placement and ANI have congruent species assignments	N/A	95.93
SHASGE3bin.37	SH_SHASGE3	uncultivable	69.67	2.339	22.6236	0.977415	d__Bacteria;p__Bacteroidota;c__Bacteroidia;o__Chitinophagales;f__Chitinophagaceae;g__JJ008;s__	N/A	N/A	N/A	N/A	N/A	N/A	N/A	N/A	N/A	N/A	d__Bacteria;p__Bacteroidota;c__Bacteroidia;o__Chitinophagales;f__Chitinophagaceae;g__JJ008;s__	taxonomic classification defined by topology and ANI	N/A	GCA_002352145.1, s__JJ008 sp002352145, 95.0, 88.53, 0.86; GCA_011331705.1, s__JJ008 sp011331705, 95.0, 83.93, 0.63; GCA_002400415.1, s__JJ008 sp002400415, 95.0, 77.53, 0.27; GCA_902826165.1, s__JJ008 sp902826165, 95.0, 77.48, 0.3; GCA_013140985.1, s__JJ008 sp013140985, 95.0, 77.47, 0.3; GCA_002342205.1, s__JJ008 sp002342205, 95.0, 77.41, 0.08; GCF_002127295.1, s__JJ008 sp002127295, 95.0, 77.25, 0…	69.05
SHASGE3bin.38	SH_SHASGE3	uncultivable	73.85	6.41	6.78588	0.734997	d__Bacteria;p__Actinobacteriota;c__Acidimicrobiia;o__Acidimicrobiales;f__;g__;s__	N/A	N/A	N/A	N/A	N/A	N/A	N/A	N/A	N/A	N/A	d__Bacteria;p__Actinobacteriota;c__Acidimicrobiia;o__Acidimicrobiales;f__;g__;s__	taxonomic novelty determined using RED	N/A	N/A	64.48
SHASGE3bin.39	SH_SHASGE3	uncultivable	70.32	2.252	5.92494	0.787738	d__Bacteria;p__Proteobacteria;c__Gammaproteobacteria;o__Chromatiales;f__Chromatiaceae;g__;s__	N/A	N/A	N/A	N/A	N/A	N/A	N/A	N/A	N/A	N/A	d__Bacteria;p__Proteobacteria;c__Gammaproteobacteria;o__Chromatiales;f__Chromatiaceae;g__;s__	taxonomic classification fully defined by topology	N/A	N/A	64.17
SHASGE3bin.4	SH_SHASGE3	uncultivable	93.35	0.873	23.6676	0.771915	d__Bacteria;p__Proteobacteria;c__Alphaproteobacteria;o__Micavibrionales_A;f__UBA9219;g__;s__	N/A	N/A	N/A	N/A	N/A	N/A	N/A	N/A	N/A	N/A	d__Bacteria;p__Proteobacteria;c__Alphaproteobacteria;o__Micavibrionales_A;f__UBA9219;g__;s__	taxonomic classification fully defined by topology	N/A	N/A	97.32
SHASGE3bin.40	SH_SHASGE3	uncultivable	55.42	4.79	5.01863	0.938946	d__Bacteria;p__Bacteroidota;c__Bacteroidia;o__Cytophagales;f__Cyclobacteriaceae;g__ELB16-189;s__	N/A	N/A	N/A	N/A	N/A	N/A	N/A	N/A	N/A	N/A	d__Bacteria;p__Bacteroidota;c__Bacteroidia;o__Cytophagales;f__Cyclobacteriaceae;g__ELB16-189;s__	ANI	N/A	GCA_013140555.1, s__ELB16-189 sp013140555, 95.0, 77.17, 0.06; GCA_003537495.1, s__ELB16-189 sp003537495, 95.0, 77.05, 0.12; GCA_002352225.1, s__ELB16-189 sp002352225, 95.0, 76.94, 0.14; GCA_001567185.1, s__ELB16-189 sp001567185, 95.0, 76.76, 0.15; GCA_002405445.1, s__ELB16-189 sp002405445, 95.0, 76.7, 0.01; GCA_013414665.1, s__ELB16-189 sp013414665, 95.0, 76.62, 0.15; GCA_013285845.1, s__ELB16-18…	46.02
SHASGE3bin.41	SH_SHASGE3	uncultivable	96.49	2.631	14.3578	0.85517	d__Bacteria;p__Acidobacteriota;c__Holophagae;o__Holophagales;f__Holophagaceae;g__;s__	N/A	N/A	N/A	N/A	N/A	N/A	N/A	N/A	N/A	N/A	d__Bacteria;p__Acidobacteriota;c__Holophagae;o__Holophagales;f__Holophagaceae;g__;s__	taxonomic classification fully defined by topology	N/A	N/A	77.45
SHASGE3bin.42	SH_SHASGE3	uncultivable	53.41	2.991	9.20801	0.846793	d__Bacteria;p__Patescibacteria;c__Saccharimonadia;o__Saccharimonadales;f__JACDFO01;g__;s__	N/A	N/A	N/A	N/A	N/A	GCA_013815785.1	95	d__Bacteria;p__Patescibacteria;c__Saccharimonadia;o__Saccharimonadales;f__JACDFO01;g__JACDFO01;s__JACDFO01 sp013815785	76.91	0.04	d__Bacteria;p__Patescibacteria;c__Saccharimonadia;o__Saccharimonadales;f__;g__;s__	taxonomic classification defined by topology and ANI	N/A	N/A	60.83
SHASGE3bin.43	SH_SHASGE3	uncultivable	51.61	5.707	4.7493	0.967412	d__Bacteria;p__Chloroflexota;c__Anaerolineae;o__Anaerolineales;f__EnvOPS12;g__UBA7227;s__	N/A	N/A	N/A	N/A	N/A	GCA_003598975.1	95	d__Bacteria;p__Chloroflexota;c__Anaerolineae;o__Anaerolineales;f__EnvOPS12;g__UBA7227;s__UBA7227 sp003598975	80.45	0.49	d__Bacteria;p__Chloroflexota;c__Anaerolineae;o__Anaerolineales;f__EnvOPS12;g__UBA7227;s__	taxonomic classification defined by topology and ANI	N/A	GCA_002473085.1, s__UBA7227 sp002473085, 95.0, 80.05, 0.45; GCA_009885445.1, s__UBA7227 sp009885445, 95.0, 76.14, 0.15	34.84
SHASGE3bin.44	SH_SHASGE3	uncultivable	73.09	6.593	5.53489	0.753941	d__Bacteria;p__Gemmatimonadota;c__Gemmatimonadetes;o__Gemmatimonadales;f__GWC2-71-9;g__;s__	N/A	N/A	N/A	N/A	N/A	N/A	N/A	N/A	N/A	N/A	d__Bacteria;p__Gemmatimonadota;c__Gemmatimonadetes;o__Gemmatimonadales;f__GWC2-71-9;g__;s__	taxonomic classification fully defined by topology	N/A	N/A	60.79
SHASGE3bin.45	SH_SHASGE3	uncultivable	58.14	8.309	4.29441	0.390795	d__Bacteria;p__Bdellovibrionota;c__;o__;f__;g__;s__	N/A	N/A	N/A	N/A	N/A	N/A	N/A	N/A	N/A	N/A	d__Bacteria;p__Bdellovibrionota;c__;o__;f__;g__;s__	taxonomic novelty determined using RED	N/A	N/A	40.24
SHASGE3bin.46	SH_SHASGE3	uncultivable	67.16	8.525	18.2425	0.740381	d__Bacteria;p__Patescibacteria;c__Paceibacteria;o__Moranbacterales;f__;g__;s__	N/A	N/A	N/A	N/A	N/A	N/A	N/A	N/A	N/A	N/A	d__Bacteria;p__Patescibacteria;c__Paceibacteria;o__Moranbacterales;f__;g__;s__	taxonomic novelty determined using RED	N/A	N/A	59.72
SHASGE3bin.49	SH_SHASGE3	uncultivable	82.53	8.108	5.84145	0.848447	d__Bacteria;p__Zixibacteria;c__MSB-5A5;o__GN15;f__FEB-12;g__;s__	N/A	N/A	N/A	N/A	N/A	GCA_003105265.1	95	d__Bacteria;p__Zixibacteria;c__MSB-5A5;o__GN15;f__FEB-12;g__FEB-12;s__FEB-12 sp003105265	76.11	0.09	d__Bacteria;p__Zixibacteria;c__MSB-5A5;o__GN15;f__FEB-12;g__;s__	taxonomic classification defined by topology and ANI	N/A	N/A	57.93
SHASGE3bin.5	SH_SHASGE3	uncultivable	53.44	7.758	5.55915	N/A	d__Bacteria;p__Proteobacteria;c__Gammaproteobacteria;o__Competibacterales;f__Competibacteraceae;g__Competibacter;s__Competibacter phosphatis	GCF_012939995.1	95	d__Bacteria;p__Proteobacteria;c__Gammaproteobacteria;o__Competibacterales;f__Competibacteraceae;g__Competibacter;s__Competibacter phosphatis	97.41	0.83	GCF_012939995.1	95	d__Bacteria;p__Proteobacteria;c__Gammaproteobacteria;o__Competibacterales;f__Competibacteraceae;g__Competibacter;s__Competibacter phosphatis	97.41	0.83	d__Bacteria;p__Proteobacteria;c__Gammaproteobacteria;o__Competibacterales;f__Competibacteraceae;g__;s__	taxonomic classification defined by topology and ANI	topological placement and ANI have congruent species assignments	N/A	35.83
SHASGE3bin.7	SH_SHASGE3	uncultivable	53.44	0	10.5801	0.825784	d__Bacteria;p__Proteobacteria;c__Gammaproteobacteria;o__Burkholderiales;f__SCOH01;g__;s__	N/A	N/A	N/A	N/A	N/A	N/A	N/A	N/A	N/A	N/A	d__Bacteria;p__Proteobacteria;c__Gammaproteobacteria;o__Burkholderiales;f__;g__;s__	taxonomic novelty determined using RED	N/A	N/A	51.2
SHASGE3bin.9	SH_SHASGE3	uncultivable	78.61	2.15	5.94751	0.758818	d__Bacteria;p__Omnitrophota;c__Koll11;o__UBA10015;f__Kpj58rc;g__;s__	N/A	N/A	N/A	N/A	N/A	N/A	N/A	N/A	N/A	N/A	d__Bacteria;p__Omnitrophota;c__Koll11;o__UBA10015;f__Kpj58rc;g__;s__	taxonomic classification fully defined by topology	N/A	N/A	62.99
szas22bin.1	SZ_SZAS22	cultivable	97	0.749	13.5268	N/A	d__Bacteria;p__Firmicutes;c__Bacilli;o__Lactobacillales;f__Enterococcaceae;g__Enterococcus_B;s__Enterococcus_B faecium	GCF_001544255.1	95	d__Bacteria;p__Firmicutes;c__Bacilli;o__Lactobacillales;f__Enterococcaceae;g__Enterococcus_B;s__Enterococcus_B faecium	99.22	0.88	GCF_001544255.1	95	d__Bacteria;p__Firmicutes;c__Bacilli;o__Lactobacillales;f__Enterococcaceae;g__Enterococcus_B;s__Enterococcus_B faecium	99.22	0.88	d__Bacteria;p__Firmicutes;c__Bacilli;o__Lactobacillales;f__Enterococcaceae;g__Enterococcus_B;s__	taxonomic classification defined by topology and ANI	topological placement and ANI have congruent species assignments	GCF_009735405.1, s__Enterococcus_B lactis, 95.0, 94.85, 0.83; GCF_011038845.1, s__Enterococcus_B sp011038845, 95.0, 81.57, 0.6; GCF_001544215.1, s__Enterococcus_B durans, 95.0, 80.77, 0.47; GCF_000271405.2, s__Enterococcus_B hirae, 95.0, 80.17, 0.44; GCF_007990225.1, s__Enterococcus_B villorum, 95.0, 79.95, 0.4; GCF_001886265.1, s__Enterococcus_B thailandicus, 95.0, 79.77, 0.4; GCF_002947535.1, s…	94.66
szas22bin.10	SZ_SZAS22	cultivable	95.84	0.125	20.3163	N/A	d__Bacteria;p__Firmicutes;c__Bacilli;o__Lactobacillales;f__Streptococcaceae;g__Lactococcus;s__Lactococcus sp009601055	GCF_009601055.1	95	d__Bacteria;p__Firmicutes;c__Bacilli;o__Lactobacillales;f__Streptococcaceae;g__Lactococcus;s__Lactococcus sp009601055	96.89	0.87	GCF_009601055.1	95	d__Bacteria;p__Firmicutes;c__Bacilli;o__Lactobacillales;f__Streptococcaceae;g__Lactococcus;s__Lactococcus sp009601055	96.89	0.87	d__Bacteria;p__Firmicutes;c__Bacilli;o__Lactobacillales;f__Streptococcaceae;g__Lactococcus;s__	taxonomic classification defined by topology and ANI	topological placement and ANI have congruent species assignments	GCF_003116835.1, s__Lactococcus termiticola, 95.0, 79.88, 0.11; GCF_002441655.1, s__Lactococcus fujiensis, 95.0, 79.76, 0.41; GCF_009601015.1, s__Lactococcus hircilactis, 95.0, 78.8, 0.37; GCF_001622305.1, s__Lactococcus lactis_A, 95.0, 78.6, 0.22; GCF_004210295.1, s__Lactococcus sp004210295, 95.0, 78.5, 0.24; GCF_002154895.1, s__Lactococcus petauri, 95.0, 78.4, 0.16; GCF_002078765.2, s__Lactococ…	93.67
szas22bin.11	SZ_SZAS22	cultivable	98.32	0	37.7114	N/A	d__Bacteria;p__Desulfobacterota;c__Desulfovibrionia;o__Desulfovibrionales;f__Desulfovibrionaceae;g__Desulfovibrio;s__Desulfovibrio desulfuricans_C	GCF_004801255.1	95	d__Bacteria;p__Desulfobacterota;c__Desulfovibrionia;o__Desulfovibrionales;f__Desulfovibrionaceae;g__Desulfovibrio;s__Desulfovibrio desulfuricans_C	95.76	0.94	GCF_004801255.1	95	d__Bacteria;p__Desulfobacterota;c__Desulfovibrionia;o__Desulfovibrionales;f__Desulfovibrionaceae;g__Desulfovibrio;s__Desulfovibrio desulfuricans_C	95.76	0.94	d__Bacteria;p__Desulfobacterota;c__Desulfovibrionia;o__Desulfovibrionales;f__Desulfovibrionaceae;g__Desulfovibrio;s__	taxonomic classification defined by topology and ANI	topological placement and ANI have congruent species assignments	GCA_009929215.1, s__Desulfovibrio sp009929215, 95.0, 85.71, 0.79; GCA_009712225.1, s__Desulfovibrio sp009712225, 95.0, 85.67, 0.84; GCF_000420465.1, s__Desulfovibrio desulfuricans, 95.0, 84.97, 0.82; GCA_003251995.1, s__Desulfovibrio desulfuricans_B, 95.0, 83.86, 0.78; GCF_902702915.1, s__Desulfovibrio sp900095395, 95.0, 80.14, 0.53; GCA_002237645.1, s__Desulfovibrio sp002237645, 95.0, 80.05, 0.5…	89.4
szas22bin.12	SZ_SZAS22	cultivable	78.84	9.89	8.80343	N/A	d__Bacteria;p__Firmicutes;c__Bacilli;o__Lactobacillales;f__Lactobacillaceae;g__Lactiplantibacillus;s__Lactiplantibacillus plantarum	GCF_014131735.1	95	d__Bacteria;p__Firmicutes;c__Bacilli;o__Lactobacillales;f__Lactobacillaceae;g__Lactiplantibacillus;s__Lactiplantibacillus plantarum	95.69	0.75	GCF_014131735.1	95	d__Bacteria;p__Firmicutes;c__Bacilli;o__Lactobacillales;f__Lactobacillaceae;g__Lactiplantibacillus;s__Lactiplantibacillus plantarum	95.69	0.75	d__Bacteria;p__Firmicutes;c__Bacilli;o__Lactobacillales;f__Lactobacillaceae;g__Lactiplantibacillus;s__	taxonomic classification defined by topology and ANI	topological placement and ANI have congruent species assignments	GCF_003641145.1, s__Lactiplantibacillus paraplantarum, 95.0, 86.87, 0.69; GCF_003641185.1, s__Lactiplantibacillus pentosus, 95.0, 83.08, 0.61; GCF_000463075.2, s__Lactiplantibacillus plantarum_A, 95.0, 82.46, 0.59; GCF_003885105.1, s__Lactiplantibacillus garii, 95.0, 80.76, 0.4; GCF_001438845.1, s__Lactiplantibacillus xiangfangensis, 95.0, 80.67, 0.39; GCF_005405405.1, s__Lactiplantibacillus plaj…	57.79
szas22bin.13	SZ_SZAS22	cultivable	98.08	0.454	126.604	N/A	d__Bacteria;p__Proteobacteria;c__Alphaproteobacteria;o__Rhodobacterales;f__Rhodobacteraceae;g__Paenirhodobacter;s__Paenirhodobacter enshiensis	GCF_000740785.1	95	d__Bacteria;p__Proteobacteria;c__Alphaproteobacteria;o__Rhodobacterales;f__Rhodobacteraceae;g__Paenirhodobacter;s__Paenirhodobacter enshiensis	98.25	0.88	GCF_000740785.1	95	d__Bacteria;p__Proteobacteria;c__Alphaproteobacteria;o__Rhodobacterales;f__Rhodobacteraceae;g__Paenirhodobacter;s__Paenirhodobacter enshiensis	98.25	0.88	d__Bacteria;p__Proteobacteria;c__Alphaproteobacteria;o__Rhodobacterales;f__Rhodobacteraceae;g__Paenirhodobacter;s__	taxonomic classification defined by topology and ANI	topological placement and ANI have congruent species assignments	GCF_004022265.1, s__Paenirhodobacter ferrireducens, 95.0, 82.76, 0.57; GCF_003664585.1, s__Paenirhodobacter hankyongi, 95.0, 82.59, 0.59; GCF_004022215.1, s__Paenirhodobacter populi, 95.0, 82.02, 0.56	96.51
szas22bin.14	SZ_SZAS22	cultivable	93.18	1.325	12.7407	N/A	d__Bacteria;p__Firmicutes;c__Bacilli;o__Lactobacillales;f__Streptococcaceae;g__Lactococcus;s__Lactococcus lactis	GCF_900099625.1	95	d__Bacteria;p__Firmicutes;c__Bacilli;o__Lactobacillales;f__Streptococcaceae;g__Lactococcus;s__Lactococcus lactis	98.25	0.82	GCF_900099625.1	95	d__Bacteria;p__Firmicutes;c__Bacilli;o__Lactobacillales;f__Streptococcaceae;g__Lactococcus;s__Lactococcus lactis	98.25	0.82	d__Bacteria;p__Firmicutes;c__Bacilli;o__Lactobacillales;f__Streptococcaceae;g__Lactococcus;s__	taxonomic classification defined by topology and ANI	topological placement and ANI have congruent species assignments	GCF_002078765.2, s__Lactococcus lactis_E, 95.0, 87.54, 0.76; GCF_001622305.1, s__Lactococcus lactis_A, 95.0, 84.76, 0.45; GCF_004210295.1, s__Lactococcus sp004210295, 95.0, 81.35, 0.45; GCF_009601015.1, s__Lactococcus hircilactis, 95.0, 79.34, 0.22; GCF_003627095.1, s__Lactococcus sp003627095, 95.0, 79.12, 0.38; GCF_006965445.1, s__Lactococcus sp006965445, 95.0, 79.1, 0.38; GCF_002355575.1, s__La…	84.34
szas22bin.15	SZ_SZAS22	cultivable	87.92	0.281	603.521	0.991658	d__Bacteria;p__Bacteroidota;c__Bacteroidia;o__Bacteroidales;f__Bacteroidaceae;g__Prevotella;s__	N/A	N/A	N/A	N/A	N/A	GCF_000373185.1	95	d__Bacteria;p__Bacteroidota;c__Bacteroidia;o__Bacteroidales;f__Bacteroidaceae;g__Prevotella;s__Prevotella paludivivens	87.29	0.88	d__Bacteria;p__Bacteroidota;c__Bacteroidia;o__Bacteroidales;f__Bacteroidaceae;g__Prevotella;s__	taxonomic classification defined by topology and ANI	N/A	GCA_900540375.1, s__Prevotella sp900540375, 95.0, 79.73, 0.05; GCF_002251385.1, s__Prevotella sp002251385, 95.0, 79.68, 0.06; GCF_000426585.1, s__Prevotella baroniae, 95.0, 78.74, 0.06; GCA_900554695.1, s__Prevotella sp900554695, 95.0, 78.63, 0.04; GCF_000157935.1, s__Prevotella copri, 95.5173, 78.59, 0.12; GCA_900544825.1, s__Prevotella sp900544825, 95.0, 78.55, 0.1; GCF_004535825.1, s__Prevotel…	89.7
szas22bin.16	SZ_SZAS22	cultivable	95.31	0	21.3535	0.995042	d__Bacteria;p__Desulfobacterota;c__Desulfovibrionia;o__Desulfovibrionales;f__Desulfovibrionaceae;g__Desulfovibrio;s__	N/A	N/A	N/A	N/A	N/A	GCA_009929215.1	95	d__Bacteria;p__Desulfobacterota;c__Desulfovibrionia;o__Desulfovibrionales;f__Desulfovibrionaceae;g__Desulfovibrio;s__Desulfovibrio sp009929215	88.67	0.81	d__Bacteria;p__Desulfobacterota;c__Desulfovibrionia;o__Desulfovibrionales;f__Desulfovibrionaceae;g__Desulfovibrio;s__	taxonomic classification defined by topology and ANI	N/A	GCA_009712225.1, s__Desulfovibrio sp009712225, 95.0, 88.39, 0.86; GCF_004801255.1, s__Desulfovibrio desulfuricans_C, 95.0, 86.09, 0.84; GCF_000420465.1, s__Desulfovibrio desulfuricans, 95.0, 85.21, 0.83; GCA_003251995.1, s__Desulfovibrio desulfuricans_B, 95.0, 84.14, 0.71; GCA_002237645.1, s__Desulfovibrio sp002237645, 95.0, 79.88, 0.52; GCF_902702915.1, s__Desulfovibrio sp900095395, 95.0, 79.75,…	77.9
szas22bin.17	SZ_SZAS22	cultivable	70.47	1.428	866.925	0.831819	d__Bacteria;p__Bacteroidota;c__Bacteroidia;o__Bacteroidales;f__UBA4181;g__;s__	N/A	N/A	N/A	N/A	N/A	N/A	N/A	N/A	N/A	N/A	d__Bacteria;p__Bacteroidota;c__Bacteroidia;o__Bacteroidales;f__;g__;s__	taxonomic novelty determined using RED	N/A	N/A	72.25
szas22bin.18	SZ_SZAS22	cultivable	67.08	0	19.4764	N/A	d__Bacteria;p__Firmicutes_C;c__Negativicutes;o__Veillonellales;f__Dialisteraceae;g__Dialister;s__Dialister hominis	GCF_007164725.1	95	d__Bacteria;p__Firmicutes_C;c__Negativicutes;o__Veillonellales;f__Dialisteraceae;g__Dialister;s__Dialister hominis	99.27	0.9	GCF_007164725.1	95	d__Bacteria;p__Firmicutes_C;c__Negativicutes;o__Veillonellales;f__Dialisteraceae;g__Dialister;s__Dialister hominis	99.27	0.9	d__Bacteria;p__Firmicutes_C;c__Negativicutes;o__Veillonellales;f__Dialisteraceae;g__Dialister;s__	taxonomic classification defined by topology and ANI	topological placement and ANI have congruent species assignments	GCA_900538805.1, s__Dialister sp900538805, 95.0, 79.99, 0.3; GCF_000160055.1, s__Dialister invisus, 95.0, 79.78, 0.1; GCA_900557365.1, s__Dialister sp900557365, 95.0, 79.77, 0.35; GCF_000242435.1, s__Dialister succinatiphilus, 95.0, 79.49, 0.31; GCA_002471975.1, s__Dialister sp002471975, 95.0, 79.47, 0.23; GCA_000434475.1, s__Dialister sp000434475, 95.0, 79.33, 0.25; GCA_900314595.1, s__Dialister…	66.53
szas22bin.2	SZ_SZAS22	cultivable	99.52	0	77.2819	0.88414	d__Bacteria;p__Proteobacteria;c__Gammaproteobacteria;o__Burkholderiales;f__Rhodocyclaceae;g__;s__	N/A	N/A	N/A	N/A	N/A	N/A	N/A	N/A	N/A	N/A	d__Bacteria;p__Proteobacteria;c__Gammaproteobacteria;o__Burkholderiales;f__Rhodocyclaceae;g__;s__	taxonomic novelty determined using RED	N/A	N/A	97.62
szas22bin.3	SZ_SZAS22	cultivable	89.18	2.393	241.232	N/A	d__Bacteria;p__Bacteroidota;c__Bacteroidia;o__Bacteroidales;f__Bacteroidaceae;g__Prevotella;s__Prevotella sp002409785	GCA_002409785.1	95	d__Bacteria;p__Bacteroidota;c__Bacteroidia;o__Bacteroidales;f__Bacteroidaceae;g__Prevotella;s__Prevotella sp002409785	99.31	0.87	GCA_002409785.1	95	d__Bacteria;p__Bacteroidota;c__Bacteroidia;o__Bacteroidales;f__Bacteroidaceae;g__Prevotella;s__Prevotella sp002409785	99.31	0.87	d__Bacteria;p__Bacteroidota;c__Bacteroidia;o__Bacteroidales;f__Bacteroidaceae;g__Prevotella;s__	taxonomic classification defined by topology and ANI	topological placement and ANI have congruent species assignments	GCA_003483565.1, s__Prevotella sp003483565, 95.0, 78.59, 0.1; GCA_900540375.1, s__Prevotella sp900540375, 95.0, 77.98, 0.06; GCF_000177075.1, s__Prevotella buccalis, 95.0, 77.48, 0.03; GCA_900322035.1, s__Prevotella sp900322035, 95.0, 77.47, 0.04; GCF_001553265.1, s__Prevotella sp001553265, 95.0, 77.37, 0.03; GCA_900554695.1, s__Prevotella sp900554695, 95.0, 77.32, 0.03; GCF_000613925.1, s__Prevo…	91.19
szas22bin.4	SZ_SZAS22	cultivable	78.57	2.07	49.4957	N/A	d__Bacteria;p__Proteobacteria;c__Gammaproteobacteria;o__Enterobacterales;f__Enterobacteriaceae;g__Kluyvera;s__Kluyvera sichuanensis	GCF_014218705.1	95	d__Bacteria;p__Proteobacteria;c__Gammaproteobacteria;o__Enterobacterales;f__Enterobacteriaceae;g__Kluyvera;s__Kluyvera sichuanensis	95.15	0.87	GCF_014218705.1	95	d__Bacteria;p__Proteobacteria;c__Gammaproteobacteria;o__Enterobacterales;f__Enterobacteriaceae;g__Kluyvera;s__Kluyvera sichuanensis	95.15	0.87	d__Bacteria;p__Proteobacteria;c__Gammaproteobacteria;o__Enterobacterales;f__Enterobacteriaceae;g__Kluyvera;s__	taxonomic classification defined by topology and ANI	topological placement and ANI have congruent species assignments	GCF_000735365.1, s__Kluyvera ascorbata, 95.0, 91.3, 0.78; GCF_001654985.1, s__Kluyvera georgiana, 95.0, 87.1, 0.74; GCA_002211745.1, s__Kluyvera georgiana_A, 95.0, 87.06, 0.79; GCF_014168815.1, s__Kluyvera ascorbata_B, 95.0, 86.77, 0.8; GCF_001571285.1, s__Kluyvera cryocrescens, 95.0, 85.95, 0.76; GCF_001266615.1, s__Kluyvera cryocrescens_A, 95.0, 85.84, 0.75; GCF_900635475.1, s__Kluyvera interme…	60.49
szas22bin.5	SZ_SZAS22	cultivable	100	0	39.4144	N/A	d__Bacteria;p__Actinobacteriota;c__Actinomycetia;o__Propionibacteriales;f__Propionibacteriaceae;g__Acidipropionibacterium;s__Acidipropionibacterium acidipropionici	GCF_001441165.1	95	d__Bacteria;p__Actinobacteriota;c__Actinomycetia;o__Propionibacteriales;f__Propionibacteriaceae;g__Acidipropionibacterium;s__Acidipropionibacterium acidipropionici	98.46	0.9	GCF_001441165.1	95	d__Bacteria;p__Actinobacteriota;c__Actinomycetia;o__Propionibacteriales;f__Propionibacteriaceae;g__Acidipropionibacterium;s__Acidipropionibacterium acidipropionici	98.46	0.9	d__Bacteria;p__Actinobacteriota;c__Actinomycetia;o__Propionibacteriales;f__Propionibacteriaceae;g__Acidipropionibacterium;s__	taxonomic classification defined by topology and ANI	topological placement and ANI have congruent species assignments	GCF_003325455.1, s__Acidipropionibacterium virtanenii, 95.0, 87.31, 0.77; GCF_000425285.1, s__Acidipropionibacterium jensenii, 95.0, 82.8, 0.66; GCF_000423445.1, s__Acidipropionibacterium thoenii, 95.0, 82.05, 0.62	98.09
szas22bin.6	SZ_SZAS22	cultivable	71.37	0.418	79.9093	0.989126	d__Bacteria;p__Bacteroidota;c__Bacteroidia;o__Bacteroidales;f__Bacteroidaceae;g__Prevotella;s__	N/A	N/A	N/A	N/A	N/A	GCF_000585355.1	95	d__Bacteria;p__Bacteroidota;c__Bacteroidia;o__Bacteroidales;f__Bacteroidaceae;g__Prevotella;s__Prevotella oryzae	87.14	0.86	d__Bacteria;p__Bacteroidota;c__Bacteroidia;o__Bacteroidales;f__Bacteroidaceae;g__Prevotella;s__	taxonomic classification defined by topology and ANI	N/A	GCA_900554695.1, s__Prevotella sp900554695, 95.0, 78.45, 0.04; GCF_000479005.1, s__Prevotella sp000479005, 95.0, 78.16, 0.04; GCA_900314915.1, s__Prevotella sp900314915, 95.0, 78.13, 0.03; GCA_902792685.1, s__Prevotella sp902792685, 95.0, 78.02, 0.03; GCA_900319895.1, s__Prevotella sp900319895, 95.0, 77.82, 0.02; GCF_900199655.1, s__Prevotella sp900199655, 95.0, 77.81, 0.03; GCA_900768785.1, s__P…	76.75
szas22bin.7	SZ_SZAS22	cultivable	98.97	4.423	17.2012	0.95376	d__Bacteria;p__Actinobacteriota;c__Actinomycetia;o__Actinomycetales;f__Actinomycetaceae;g__Pauljensenia;s__	N/A	N/A	N/A	N/A	N/A	N/A	N/A	N/A	N/A	N/A	d__Bacteria;p__Actinobacteriota;c__Actinomycetia;o__Actinomycetales;f__Actinomycetaceae;g__Pauljensenia;s__	ANI	N/A	GCF_000820725.1, s__Pauljensenia polynesiensis, 95.0, 80.2, 0.48; GCF_900155435.1, s__Pauljensenia provencensis, 95.0, 80.0, 0.4; GCF_900499005.1, s__Pauljensenia culturomici, 95.0, 79.64, 0.42; GCF_001746855.1, s__Pauljensenia hongkongensis, 95.0, 79.02, 0.35; GCF_014208035.1, s__Pauljensenia hyovaginalis, 95.0, 78.8, 0.34; GCF_000429245.1, s__Pauljensenia georgiae, 95.0, 78.8, 0.35; GCF_0010724…	96.07
szas22bin.8	SZ_SZAS22	cultivable	97.29	1.127	38.9314	0.98851	d__Bacteria;p__Bacteroidota;c__Bacteroidia;o__Bacteroidales;f__Bacteroidaceae;g__JAAYUD01;s__	N/A	N/A	N/A	N/A	N/A	GCA_012517855.1	95	d__Bacteria;p__Bacteroidota;c__Bacteroidia;o__Bacteroidales;f__Bacteroidaceae;g__JAAYUD01;s__JAAYUD01 sp012517855	88.03	0.81	d__Bacteria;p__Bacteroidota;c__Bacteroidia;o__Bacteroidales;f__Bacteroidaceae;g__;s__	taxonomic classification defined by topology and ANI	N/A	N/A	96.88
szas22bin.9	SZ_SZAS22	cultivable	97.02	0.867	29.4512	0.995461	d__Bacteria;p__Bacteroidota;c__Bacteroidia;o__Bacteroidales;f__Bacteroidaceae;g__Bacteroides;s__	N/A	N/A	N/A	N/A	N/A	GCF_007896885.1	95	d__Bacteria;p__Bacteroidota;c__Bacteroidia;o__Bacteroidales;f__Bacteroidaceae;g__Bacteroides;s__Bacteroides sp007896885	93.92	0.8	d__Bacteria;p__Bacteroidota;c__Bacteroidia;o__Bacteroidales;f__Bacteroidaceae;g__Bacteroides;s__	taxonomic classification defined by topology and ANI	N/A	GCA_900765785.1, s__Bacteroides sp900765785, 95.0, 81.57, 0.09; GCA_900766195.1, s__Bacteroides sp900766195, 95.0, 79.94, 0.29; GCA_009929715.1, s__Bacteroides sp009929715, 95.0, 79.38, 0.1; GCF_000315485.1, s__Bacteroides oleiciplenus, 95.0, 78.08, 0.14; GCF_902364365.1, s__Bacteroides sp900556215, 95.2143, 77.98, 0.16; GCF_000186225.1, s__Bacteroides helcogenes, 95.0, 77.93, 0.11; GCA_900760255…	97.16
szas25bin.1	SZ_SZAS25	uncultivable	78.02	2.205	6.24622	0.961634	d__Bacteria;p__Actinobacteriota;c__Actinomycetia;o__Nanopelagicales;f__UBA10799;g__UBA10799;s__	N/A	N/A	N/A	N/A	N/A	GCA_003452655.1	95	d__Bacteria;p__Actinobacteriota;c__Actinomycetia;o__Nanopelagicales;f__UBA10799;g__UBA10799;s__UBA10799 sp003452655	81.92	0.42	d__Bacteria;p__Actinobacteriota;c__Actinomycetia;o__Nanopelagicales;f__;g__;s__	taxonomic classification defined by topology and ANI	N/A	N/A	74.85
szas25bin.10	SZ_SZAS25	uncultivable	66.48	2.272	5.50021	0.92122	d__Bacteria;p__Planctomycetota;c__UBA8742;o__UBA2392;f__UBA2392;g__UBA2392;s__	N/A	N/A	N/A	N/A	N/A	N/A	N/A	N/A	N/A	N/A	d__Bacteria;p__Planctomycetota;c__UBA8742;o__UBA2392;f__UBA2392;g__;s__	taxonomic novelty determined using RED	N/A	N/A	50.57
szas25bin.11	SZ_SZAS25	uncultivable	63.37	2.247	20.383	0.840471	d__Bacteria;p__Patescibacteria;c__Paceibacteria;o__UBA9983_A;f__UBA9973;g__;s__	N/A	N/A	N/A	N/A	N/A	N/A	N/A	N/A	N/A	N/A	d__Bacteria;p__Patescibacteria;c__Paceibacteria;o__UBA9983_A;f__UBA9973;g__;s__	taxonomic novelty determined using RED	N/A	N/A	49.02
szas25bin.12	SZ_SZAS25	uncultivable	57.92	0.813	11.8053	0.777125	d__Bacteria;p__Dependentiae;c__Babeliae;o__Babeliales;f__JABCYS01;g__;s__	N/A	N/A	N/A	N/A	N/A	GCA_013290085.1	95	d__Bacteria;p__Dependentiae;c__Babeliae;o__Babeliales;f__JABCYS01;g__JABCYS01;s__JABCYS01 sp013290085	75.63	0.06	d__Bacteria;p__Dependentiae;c__Babeliae;o__Babeliales;f__;g__;s__	taxonomic classification defined by topology and ANI	N/A	N/A	77.41
szas25bin.13	SZ_SZAS25	uncultivable	56.26	4.512	7.94896	0.802418	d__Bacteria;p__Proteobacteria;c__Gammaproteobacteria;o__Burkholderiales;f__Chitinimonadaceae;g__;s__	N/A	N/A	N/A	N/A	N/A	N/A	N/A	N/A	N/A	N/A	d__Bacteria;p__Proteobacteria;c__Gammaproteobacteria;o__Burkholderiales;f__;g__;s__	taxonomic novelty determined using RED	N/A	N/A	41.06
szas25bin.14	SZ_SZAS25	uncultivable	56.23	0.313	17.8964	0.767328	d__Bacteria;p__Patescibacteria;c__Microgenomatia;o__UBA1406;f__GWC2-37-13;g__;s__	N/A	N/A	N/A	N/A	N/A	GCA_001789965.1	95	d__Bacteria;p__Patescibacteria;c__Microgenomatia;o__UBA1406;f__GWC2-37-13;g__2-01-FULL-40-42;s__2-01-FULL-40-42 sp001789965	84.07	0.01	d__Bacteria;p__Patescibacteria;c__Microgenomatia;o__UBA1406;f__GWC2-37-13;g__;s__	taxonomic classification defined by topology and ANI	N/A	N/A	49.04
szas25bin.15	SZ_SZAS25	uncultivable	68.05	1.851	62.5177	0.813135	d__Bacteria;p__Patescibacteria;c__Saccharimonadia;o__Saccharimonadales;f__2-12-FULL-41-12;g__;s__	N/A	N/A	N/A	N/A	N/A	GCA_001790445.1	95	d__Bacteria;p__Patescibacteria;c__Saccharimonadia;o__Saccharimonadales;f__2-12-FULL-41-12;g__2-12-FULL-41-12;s__2-12-FULL-41-12 sp001790445	75.93	0.05	d__Bacteria;p__Patescibacteria;c__Saccharimonadia;o__Saccharimonadales;f__;g__;s__	taxonomic classification defined by topology and ANI	N/A	N/A	73.62
szas25bin.19	SZ_SZAS25	uncultivable	58.01	1.748	5.36809	0.6848	d__Bacteria;p__Bdellovibrionota_C;c__UBA2361;o__SZUA-149;f__;g__;s__	N/A	N/A	N/A	N/A	N/A	GCA_003230795.1	95	d__Bacteria;p__Bdellovibrionota_C;c__UBA2361;o__SZUA-149;f__SZUA-149;g__SZUA-149;s__SZUA-149 sp003230795	74.68	0	d__Bacteria;p__Bdellovibrionota_C;c__UBA2361;o__;f__;g__;s__	taxonomic classification defined by topology and ANI	N/A	N/A	50.49
szas25bin.2	SZ_SZAS25	uncultivable	74.46	0	6.29546	0.925454	d__Bacteria;p__Proteobacteria;c__Gammaproteobacteria;o__Pseudomonadales;f__Saccharospirillaceae;g__;s__	N/A	N/A	N/A	N/A	N/A	N/A	N/A	N/A	N/A	N/A	d__Bacteria;p__Proteobacteria;c__Gammaproteobacteria;o__Pseudomonadales;f__Saccharospirillaceae;g__;s__	taxonomic novelty determined using RED	N/A	N/A	63.77
szas25bin.20	SZ_SZAS25	uncultivable	86.55	2.678	6.87233	0.829162	d__Bacteria;p__Bdellovibrionota;c__Bdellovibrionia;o__Bdellovibrionales;f__Bdellovibrionaceae;g__;s__	N/A	N/A	N/A	N/A	N/A	GCA_002773975.1	95	d__Bacteria;p__Bdellovibrionota;c__Bdellovibrionia;o__Bdellovibrionales;f__Bdellovibrionaceae;g__21-14-0-10-47-8;s__21-14-0-10-47-8 sp002773975	76.07	0.04	d__Bacteria;p__Bdellovibrionota;c__Bdellovibrionia;o__Bdellovibrionales;f__Bdellovibrionaceae;g__;s__	taxonomic classification defined by topology and ANI	N/A	N/A	66.27
szas25bin.21	SZ_SZAS25	uncultivable	56.28	2.991	6.11624	0.727237	d__Bacteria;p__Actinobacteriota;c__Thermoleophilia;o__Solirubrobacterales;f__;g__;s__	N/A	N/A	N/A	N/A	N/A	N/A	N/A	N/A	N/A	N/A	d__Bacteria;p__Actinobacteriota;c__Thermoleophilia;o__Solirubrobacterales;f__;g__;s__	taxonomic novelty determined using RED	N/A	N/A	45.34
szas25bin.23	SZ_SZAS25	uncultivable	60.25	4.128	10.3427	0.640944	d__Bacteria;p__Patescibacteria;c__Saccharimonadia;o__CAILAD01;f__;g__;s__	N/A	N/A	N/A	N/A	N/A	N/A	N/A	N/A	N/A	N/A	d__Bacteria;p__Patescibacteria;c__Saccharimonadia;o__;f__;g__;s__	taxonomic novelty determined using RED	N/A	N/A	56.2
szas25bin.24	SZ_SZAS25	uncultivable	86.41	4.787	15.664	0.951641	d__Bacteria;p__Actinobacteriota;c__Actinomycetia;o__Mycobacteriales;f__Mycobacteriaceae;g__Mycobacterium;s__	N/A	N/A	N/A	N/A	N/A	N/A	N/A	N/A	N/A	N/A	d__Bacteria;p__Actinobacteriota;c__Actinomycetia;o__Mycobacteriales;f__Mycobacteriaceae;g__Mycobacterium;s__	taxonomic classification defined by topology and ANI	N/A	GCF_001494595.1, s__Mycobacterium sp001494595, 95.0, 83.11, 0.82; GCF_011694515.1, s__Mycobacterium sp011694515, 95.0, 82.76, 0.75; GCF_002723835.1, s__Mycobacterium sp002723835, 95.0, 82.38, 0.8; GCF_010731855.1, s__Mycobacterium anyangense, 95.0, 82.37, 0.77; GCA_002007745.1, s__Mycobacterium litorale_A, 95.0, 81.92, 0.75; GCF_004745805.1, s__Mycobacterium sp004745805, 95.0, 81.89, 0.76; GCF_00…	66.51
szas25bin.25	SZ_SZAS25	uncultivable	69.26	0	5.62964	0.870783	d__Bacteria;p__Chlamydiota;c__Chlamydiia;o__Chlamydiales;f__Parachlamydiaceae;g__JABDGJ01;s__	N/A	N/A	N/A	N/A	N/A	GCA_013286075.1	95	d__Bacteria;p__Chlamydiota;c__Chlamydiia;o__Chlamydiales;f__Parachlamydiaceae;g__JABDGJ01;s__JABDGJ01 sp013286075	79.1	0.02	d__Bacteria;p__Chlamydiota;c__Chlamydiia;o__Chlamydiales;f__Parachlamydiaceae;g__;s__	taxonomic classification defined by topology and ANI	N/A	N/A	50.09
szas25bin.26	SZ_SZAS25	uncultivable	56.63	0.925	20.7104	0.909018	d__Bacteria;p__Patescibacteria;c__Saccharimonadia;o__Saccharimonadales;f__Saccharimonadaceae;g__UBA2112;s__	N/A	N/A	N/A	N/A	N/A	GCA_002331045.1	95	d__Bacteria;p__Patescibacteria;c__Saccharimonadia;o__Saccharimonadales;f__Saccharimonadaceae;g__UBA2112;s__UBA2112 sp002331045	77.29	0.1	d__Bacteria;p__Patescibacteria;c__Saccharimonadia;o__Saccharimonadales;f__Saccharimonadaceae;g__;s__	taxonomic classification defined by topology and ANI	N/A	N/A	61.47
szas25bin.28	SZ_SZAS25	uncultivable	64.47	8.591	14.9138	0.861499	d__Bacteria;p__Patescibacteria;c__Saccharimonadia;o__Saccharimonadales;f__UBA10212_A;g__2-02-FULL-47-12;s__	N/A	N/A	N/A	N/A	N/A	GCA_001790455.1	95	d__Bacteria;p__Patescibacteria;c__Saccharimonadia;o__Saccharimonadales;f__UBA10212_A;g__2-02-FULL-47-12;s__2-02-FULL-47-12 sp001790455	76.83	0.04	d__Bacteria;p__Patescibacteria;c__Saccharimonadia;o__Saccharimonadales;f__;g__;s__	taxonomic classification defined by topology and ANI	N/A	N/A	54.56
szas25bin.29	SZ_SZAS25	uncultivable	58.9	1.395	5.04526	0.757605	d__Bacteria;p__Bdellovibrionota;c__Bdellovibrionia;o__Bdellovibrionales;f__Bdellovibrionaceae;g__;s__	N/A	N/A	N/A	N/A	N/A	GCA_005793345.1	95	d__Bacteria;p__Bdellovibrionota;c__Bdellovibrionia;o__Bdellovibrionales;f__Bdellovibrionaceae;g__SXSU01;s__SXSU01 sp005793345	76.05	0.02	d__Bacteria;p__Bdellovibrionota;c__Bdellovibrionia;o__Bdellovibrionales;f__Bdellovibrionaceae;g__;s__	taxonomic classification defined by topology and ANI	N/A	N/A	50.49
szas25bin.3	SZ_SZAS25	uncultivable	61.49	1.552	23.3414	0.910772	d__Bacteria;p__Proteobacteria;c__Gammaproteobacteria;o__Competibacterales;f__Competibacteraceae;g__Competibacter_A;s__	N/A	N/A	N/A	N/A	N/A	N/A	N/A	N/A	N/A	N/A	d__Bacteria;p__Proteobacteria;c__Gammaproteobacteria;o__Competibacterales;f__Competibacteraceae;g__Competibacter_A;s__	ANI	N/A	GCA_002352125.1, s__Competibacter_A sp002352125, 95.0, 81.11, 0.47; GCA_002391525.1, s__Competibacter_A sp002391525, 95.0, 79.99, 0.48; GCA_903882995.1, s__Competibacter_A sp903882995, 95.0, 79.34, 0.03; GCA_003527885.1, s__Competibacter_A sp003527885, 95.0, 79.17, 0.34; GCA_002433805.1, s__Competibacter_A sp002433805, 95.0, 78.74, 0.34; GCF_001051235.1, s__Competibacter_A denitrificans, 95.0, 77…	64.5
szas25bin.30	SZ_SZAS25	uncultivable	70.6	8.063	5.54289	0.623277	d__Bacteria;p__Planctomycetota;c__UBA1135;o__B15-G4;f__;g__;s__	N/A	N/A	N/A	N/A	N/A	GCA_009691715.1	95	d__Bacteria;p__Planctomycetota;c__UBA1135;o__B15-G4;f__SIAN01;g__SIAN01;s__SIAN01 sp009691715	75.51	0.15	d__Bacteria;p__Planctomycetota;c__UBA1135;o__B15-G4;f__;g__;s__	taxonomic classification defined by topology and ANI	N/A	N/A	53.25
szas25bin.31	SZ_SZAS25	uncultivable	66.34	3.716	5.48777	0.924132	d__Bacteria;p__Chlamydiota;c__Chlamydiia;o__Chlamydiales;f__Rhabdochlamydiaceae;g__CAIJXB01;s__	N/A	N/A	N/A	N/A	N/A	GCA_903824495.1	95	d__Bacteria;p__Chlamydiota;c__Chlamydiia;o__Chlamydiales;f__Rhabdochlamydiaceae;g__CAIJXB01;s__CAIJXB01 sp903824495	77.06	0.14	d__Bacteria;p__Chlamydiota;c__Chlamydiia;o__Chlamydiales;f__Rhabdochlamydiaceae;g__;s__	taxonomic classification defined by topology and ANI	N/A	N/A	54.7
szas25bin.32	SZ_SZAS25	uncultivable	62.54	2.376	6.25595	0.843905	d__Bacteria;p__Patescibacteria;c__Paceibacteria;o__Moranbacterales;f__UBA1568;g__;s__	N/A	N/A	N/A	N/A	N/A	GCA_008012175.1	95	d__Bacteria;p__Patescibacteria;c__Paceibacteria;o__Moranbacterales;f__UBA1568;g__SSEF01;s__SSEF01 sp008012175	76.47	0.1	d__Bacteria;p__Patescibacteria;c__Paceibacteria;o__Moranbacterales;f__UBA1568;g__;s__	taxonomic classification defined by topology and ANI	N/A	N/A	63.85
szas25bin.33	SZ_SZAS25	uncultivable	85.14	8.054	8.52727	N/A	d__Bacteria;p__Proteobacteria;c__Gammaproteobacteria;o__Burkholderiales;f__Rhodocyclaceae;g__SSSZ01;s__SSSZ01 sp009469685	GCA_009469685.1	95	d__Bacteria;p__Proteobacteria;c__Gammaproteobacteria;o__Burkholderiales;f__Rhodocyclaceae;g__SSSZ01;s__SSSZ01 sp009469685	98.97	0.71	GCA_009469685.1	95	d__Bacteria;p__Proteobacteria;c__Gammaproteobacteria;o__Burkholderiales;f__Rhodocyclaceae;g__SSSZ01;s__SSSZ01 sp009469685	98.97	0.71	d__Bacteria;p__Proteobacteria;c__Gammaproteobacteria;o__Burkholderiales;f__Rhodocyclaceae;g__SSSZ01;s__	taxonomic classification defined by topology and ANI	topological placement and ANI have congruent species assignments	GCA_009469665.1, s__SSSZ01 sp009469665, 95.0, 81.57, 0.46; GCA_009469675.1, s__SSSZ01 sp009469675, 95.0, 80.15, 0.48	69.05
szas25bin.34	SZ_SZAS25	uncultivable	67.76	6.359	16.0534	0.767884	d__Bacteria;p__Patescibacteria;c__SICC01;o__SICC01;f__SICC01;g__;s__	N/A	N/A	N/A	N/A	N/A	GCA_009694835.1	95	d__Bacteria;p__Patescibacteria;c__SICC01;o__SICC01;f__SICC01;g__SICC01;s__SICC01 sp009694835	79.41	0.04	d__Bacteria;p__Patescibacteria;c__;o__;f__;g__;s__	taxonomic classification defined by topology and ANI	N/A	N/A	66.77
szas25bin.36	SZ_SZAS25	uncultivable	81.22	8.303	14.0897	0.942174	d__Bacteria;p__Proteobacteria;c__Gammaproteobacteria;o__Burkholderiales;f__Rhodocyclaceae;g__Sulfuritalea;s__	N/A	N/A	N/A	N/A	N/A	N/A	N/A	N/A	N/A	N/A	d__Bacteria;p__Proteobacteria;c__Gammaproteobacteria;o__Burkholderiales;f__Rhodocyclaceae;g__Sulfuritalea;s__	ANI	N/A	GCA_903908065.1, s__Sulfuritalea sp903908065, 95.0, 81.93, 0.63; GCF_000828635.1, s__Sulfuritalea hydrogenivorans, 95.0, 81.53, 0.64; GCA_903959855.1, s__Sulfuritalea sp903959855, 95.0, 81.1, 0.56; GCA_006218025.1, s__Sulfuritalea sp006218025, 95.0, 81.1, 0.59; GCA_903933395.1, s__Sulfuritalea sp903933395, 95.0, 81.08, 0.45; GCA_903848955.1, s__Sulfuritalea sp903848955, 95.0, 80.68, 0.53; GCA_001…	71.03
szas25bin.37	SZ_SZAS25	uncultivable	76.4	1.075	6.05726	0.718688	d__Bacteria;p__Omnitrophota;c__Koll11;o__UBA10015;f__;g__;s__	N/A	N/A	N/A	N/A	N/A	N/A	N/A	N/A	N/A	N/A	d__Bacteria;p__Omnitrophota;c__Koll11;o__UBA10015;f__;g__;s__	taxonomic novelty determined using RED	N/A	N/A	65.06
szas25bin.38	SZ_SZAS25	uncultivable	90.61	1.68	8.65992	0.669696	d__Bacteria;p__Bdellovibrionota_C;c__UBA2361;o__UBA2361;f__;g__;s__	N/A	N/A	N/A	N/A	N/A	N/A	N/A	N/A	N/A	N/A	d__Bacteria;p__Bdellovibrionota_C;c__UBA2361;o__UBA2361;f__;g__;s__	taxonomic novelty determined using RED	N/A	N/A	86.86
szas25bin.39	SZ_SZAS25	uncultivable	96.01	6.267	19.9349	0.814785	d__Bacteria;p__Actinobacteriota;c__Thermoleophilia;o__Solirubrobacterales;f__Solirubrobacteraceae;g__;s__	N/A	N/A	N/A	N/A	N/A	GCA_009699865.1	95	d__Bacteria;p__Actinobacteriota;c__Thermoleophilia;o__Solirubrobacterales;f__Solirubrobacteraceae;g__WLNJ01;s__WLNJ01 sp009699865	76.44	0.09	d__Bacteria;p__Actinobacteriota;c__Thermoleophilia;o__Solirubrobacterales;f__Solirubrobacteraceae;g__;s__	taxonomic classification defined by topology and ANI	N/A	N/A	83.56
szas25bin.4	SZ_SZAS25	uncultivable	69.44	0.925	18.1662	0.654356	d__Bacteria;p__Patescibacteria;c__Saccharimonadia;o__CAILAD01;f__;g__;s__	N/A	N/A	N/A	N/A	N/A	N/A	N/A	N/A	N/A	N/A	d__Bacteria;p__Patescibacteria;c__Saccharimonadia;o__;f__;g__;s__	taxonomic novelty determined using RED	N/A	N/A	78.7
szas25bin.40	SZ_SZAS25	uncultivable	61.2	8.62	27.5282	0.822504	d__Bacteria;p__Proteobacteria;c__Gammaproteobacteria;o__Burkholderiales;f__SCOH01;g__;s__	N/A	N/A	N/A	N/A	N/A	N/A	N/A	N/A	N/A	N/A	d__Bacteria;p__Proteobacteria;c__Gammaproteobacteria;o__Burkholderiales;f__;g__;s__	taxonomic novelty determined using RED	N/A	N/A	39.15
szas25bin.41	SZ_SZAS25	uncultivable	53.89	2.248	5.52665	0.762573	d__Bacteria;p__Omnitrophota;c__Koll11;o__2-02-FULL-51-18;f__2-02-FULL-51-18;g__;s__	N/A	N/A	N/A	N/A	N/A	N/A	N/A	N/A	N/A	N/A	d__Bacteria;p__Omnitrophota;c__Koll11;o__;f__;g__;s__	taxonomic novelty determined using RED	N/A	N/A	43.48
szas25bin.42	SZ_SZAS25	uncultivable	66.66	0.462	9.36057	0.648207	d__Bacteria;p__Patescibacteria;c__Saccharimonadia;o__CAILAD01;f__;g__;s__	N/A	N/A	N/A	N/A	N/A	N/A	N/A	N/A	N/A	N/A	d__Bacteria;p__Patescibacteria;c__Saccharimonadia;o__;f__;g__;s__	taxonomic novelty determined using RED	N/A	N/A	71.11
szas25bin.43	SZ_SZAS25	uncultivable	71.84	2.037	5.53063	0.887905	d__Bacteria;p__Proteobacteria;c__Alphaproteobacteria;o__Dongiales;f__Dongiaceae;g__;s__	N/A	N/A	N/A	N/A	N/A	N/A	N/A	N/A	N/A	N/A	d__Bacteria;p__Proteobacteria;c__Alphaproteobacteria;o__Dongiales;f__Dongiaceae;g__;s__	taxonomic novelty determined using RED	N/A	N/A	58.11
szas25bin.45	SZ_SZAS25	uncultivable	63.71	6.25	5.32196	0.77405	d__Bacteria;p__Bdellovibrionota;c__Bdellovibrionia;o__Bdellovibrionales;f__UBA1609;g__;s__	N/A	N/A	N/A	N/A	N/A	N/A	N/A	N/A	N/A	N/A	d__Bacteria;p__Bdellovibrionota;c__Bdellovibrionia;o__Bdellovibrionales;f__UBA1609;g__;s__	taxonomic novelty determined using RED	N/A	N/A	51.78
szas25bin.46	SZ_SZAS25	uncultivable	68.96	3.448	7.56607	0.897055	d__Bacteria;p__Proteobacteria;c__Gammaproteobacteria;o__Burkholderiales;f__Casimicrobiaceae;g__VBCG01;s__	N/A	N/A	N/A	N/A	N/A	GCA_005881895.1	95	d__Bacteria;p__Proteobacteria;c__Gammaproteobacteria;o__Burkholderiales;f__Casimicrobiaceae;g__VBCG01;s__VBCG01 sp005881895	76.85	0.22	d__Bacteria;p__Proteobacteria;c__Gammaproteobacteria;o__Burkholderiales;f__Casimicrobiaceae;g__;s__	taxonomic classification defined by topology and ANI	N/A	N/A	50.72
szas25bin.47	SZ_SZAS25	uncultivable	68.33	5.987	14.5194	0.944407	d__Bacteria;p__Proteobacteria;c__Gammaproteobacteria;o__Burkholderiales;f__Rhodocyclaceae;g__CAIQBG01;s__	N/A	N/A	N/A	N/A	N/A	N/A	N/A	N/A	N/A	N/A	d__Bacteria;p__Proteobacteria;c__Gammaproteobacteria;o__Burkholderiales;f__Rhodocyclaceae;g__;s__	taxonomic novelty determined using RED	N/A	N/A	63.61
szas25bin.48	SZ_SZAS25	uncultivable	66.82	1.234	10.5105	0.905121	d__Bacteria;p__Patescibacteria;c__Saccharimonadia;o__Saccharimonadales;f__UBA4665;g__RGVC01;s__	N/A	N/A	N/A	N/A	N/A	GCA_010027485.1	95	d__Bacteria;p__Patescibacteria;c__Saccharimonadia;o__Saccharimonadales;f__UBA4665;g__RGVC01;s__RGVC01 sp010027485	76.41	0.05	d__Bacteria;p__Patescibacteria;c__Saccharimonadia;o__Saccharimonadales;f__UBA4665;g__;s__	taxonomic classification defined by topology and ANI	N/A	N/A	74.25
szas25bin.49	SZ_SZAS25	uncultivable	62.06	1.651	5.48949	0.897354	d__Bacteria;p__Proteobacteria;c__Gammaproteobacteria;o__Burkholderiales;f__Nitrosomonadaceae;g__Nitrosomonas;s__	N/A	N/A	N/A	N/A	N/A	N/A	N/A	N/A	N/A	N/A	d__Bacteria;p__Proteobacteria;c__Gammaproteobacteria;o__Burkholderiales;f__Nitrosomonadaceae;g__Nitrosomonas;s__	ANI	N/A	GCF_003201565.1, s__Nitrosomonas sp003201565, 95.0, 80.08, 0.18; GCF_900106555.1, s__Nitrosomonas oligotropha_A, 95.0, 79.97, 0.17; GCF_000175095.2, s__Nitrosomonas sp000175095, 95.0, 79.61, 0.16; GCF_000219585.1, s__Nitrosomonas sp000219585, 95.0, 79.48, 0.16; GCF_009833095.1, s__Nitrosomonas sp009833095, 95.0, 78.72, 0.16; GCA_902826915.1, s__Nitrosomonas sp902826915, 95.0, 78.45, 0.11; GCA_002…	48.2
szas25bin.5	SZ_SZAS25	uncultivable	65.74	0.854	6.42808	0.866755	d__Bacteria;p__Patescibacteria;c__Gracilibacteria;o__UBA1369;f__2-02-FULL-48-14;g__2-02-FULL-48-14;s__	N/A	N/A	N/A	N/A	N/A	GCA_001787475.1	95	d__Bacteria;p__Patescibacteria;c__Gracilibacteria;o__UBA1369;f__2-02-FULL-48-14;g__2-02-FULL-48-14;s__2-02-FULL-48-14 sp001787475	76.97	0.09	d__Bacteria;p__Patescibacteria;c__Gracilibacteria;o__UBA1369;f__;g__;s__	taxonomic classification defined by topology and ANI	N/A	N/A	60
szas25bin.50	SZ_SZAS25	uncultivable	71.63	5.232	21.0551	0.901616	d__Bacteria;p__Proteobacteria;c__Alphaproteobacteria;o__Rhizobiales;f__Xanthobacteraceae;g__;s__	N/A	N/A	N/A	N/A	N/A	N/A	N/A	N/A	N/A	N/A	d__Bacteria;p__Proteobacteria;c__Alphaproteobacteria;o__Rhizobiales;f__Xanthobacteraceae;g__;s__	taxonomic novelty determined using RED	N/A	N/A	63.29
szas25bin.51	SZ_SZAS25	uncultivable	76.52	2.725	7.0851	0.499446	d__Bacteria;p__Aureabacteria;c__SURF-26;o__;f__;g__;s__	N/A	N/A	N/A	N/A	N/A	GCA_003599815.1	95	d__Bacteria;p__Aureabacteria;c__SURF-26;o__SURF-26;f__SURF-26;g__SURF-26;s__SURF-26 sp003599815	74.54	0.01	d__Bacteria;p__Aureabacteria;c__;o__;f__;g__;s__	taxonomic classification defined by topology and ANI	N/A	N/A	65.54
szas25bin.52	SZ_SZAS25	uncultivable	73.82	3.73	5.98996	0.642593	d__Bacteria;p__Cyanobacteria;c__Vampirovibrionia;o__Obscuribacterales;f__;g__;s__	N/A	N/A	N/A	N/A	N/A	N/A	N/A	N/A	N/A	N/A	d__Bacteria;p__Cyanobacteria;c__Vampirovibrionia;o__;f__;g__;s__	taxonomic novelty determined using RED	N/A	N/A	63.51
szas25bin.53	SZ_SZAS25	uncultivable	65.84	0	13.2376	0.804764	d__Bacteria;p__Patescibacteria;c__Microgenomatia;o__Levybacterales;f__UBA12049;g__;s__	N/A	N/A	N/A	N/A	N/A	GCA_013816255.1	95	d__Bacteria;p__Patescibacteria;c__Microgenomatia;o__Levybacterales;f__UBA12049;g__JACDET01;s__JACDET01 sp013816255	78.86	0.01	d__Bacteria;p__Patescibacteria;c__Microgenomatia;o__Levybacterales;f__UBA12049;g__;s__	taxonomic classification defined by topology and ANI	N/A	N/A	69.29
szas25bin.54	SZ_SZAS25	uncultivable	54.54	5.263	4.51734	0.81499	d__Bacteria;p__Bdellovibrionota;c__Bdellovibrionia;o__Bdellovibrionales;f__Bdellovibrionaceae;g__;s__	N/A	N/A	N/A	N/A	N/A	N/A	N/A	N/A	N/A	N/A	d__Bacteria;p__Bdellovibrionota;c__Bdellovibrionia;o__Bdellovibrionales;f__Bdellovibrionaceae;g__;s__	taxonomic classification fully defined by topology	N/A	N/A	40.1
szas25bin.55	SZ_SZAS25	uncultivable	53.34	0.917	9.55018	0.567932	d__Bacteria;p__Patescibacteria;c__UBA1384;o__;f__;g__;s__	N/A	N/A	N/A	N/A	N/A	N/A	N/A	N/A	N/A	N/A	d__Bacteria;p__Patescibacteria;c__UBA1384;o__;f__;g__;s__	taxonomic novelty determined using RED	N/A	N/A	53.86
szas25bin.56	SZ_SZAS25	uncultivable	72.06	0	28.6265	0.831999	d__Bacteria;p__Patescibacteria;c__Saccharimonadia;o__Saccharimonadales;f__AWTP1-31;g__;s__	N/A	N/A	N/A	N/A	N/A	N/A	N/A	N/A	N/A	N/A	d__Bacteria;p__Patescibacteria;c__Saccharimonadia;o__Saccharimonadales;f__;g__;s__	taxonomic novelty determined using RED	N/A	N/A	76.37
szas25bin.57	SZ_SZAS25	uncultivable	56.73	1.724	11.1857	0.797128	d__Bacteria;p__Patescibacteria;c__Microgenomatia;o__Levybacterales;f__GWA1-39-11;g__;s__	N/A	N/A	N/A	N/A	N/A	GCA_001782015.1	95	d__Bacteria;p__Patescibacteria;c__Microgenomatia;o__Levybacterales;f__GWA1-39-11;g__2-01-FULL-36-15;s__2-01-FULL-36-15 sp001782015	76.9	0.02	d__Bacteria;p__Patescibacteria;c__Microgenomatia;o__Levybacterales;f__GWA1-39-11;g__;s__	taxonomic classification defined by topology and ANI	N/A	N/A	53.82
szas25bin.58	SZ_SZAS25	uncultivable	81.86	9.499	6.20593	0.901006	d__Bacteria;p__Actinobacteriota;c__Actinomycetia;o__Propionibacteriales;f__Nocardioidaceae;g__Marmoricola;s__	N/A	N/A	N/A	N/A	N/A	N/A	N/A	N/A	N/A	N/A	d__Bacteria;p__Actinobacteriota;c__Actinomycetia;o__Propionibacteriales;f__Nocardioidaceae;g__Marmoricola;s__	ANI	N/A	GCF_000426045.1, s__Marmoricola sp000426045, 95.0, 77.43, 0.19; GCF_003725775.1, s__Marmoricola solisilvae, 95.0, 77.4, 0.18; GCF_900104965.1, s__Marmoricola scoriae, 95.0, 77.35, 0.19; GCF_000720335.1, s__Marmoricola aequoreus, 95.0, 77.31, 0.18; GCF_003674065.1, s__Marmoricola sp003674065, 95.0, 77.26, 0.14; GCF_003752505.1, s__Marmoricola aurantiacus, 95.0, 77.15, 0.19; GCA_014644415.1, s__Mar…	69.53
szas25bin.59	SZ_SZAS25	uncultivable	67.96	0.462	83.1156	0.82246	d__Bacteria;p__Patescibacteria;c__Saccharimonadia;o__CAILAD01;f__CAILAD01;g__;s__	N/A	N/A	N/A	N/A	N/A	N/A	N/A	N/A	N/A	N/A	d__Bacteria;p__Patescibacteria;c__Saccharimonadia;o__CAILAD01;f__;g__;s__	taxonomic novelty determined using RED	N/A	N/A	68.27
szas25bin.6	SZ_SZAS25	uncultivable	86.52	3.535	11.832	0.962073	d__Bacteria;p__Proteobacteria;c__Gammaproteobacteria;o__Burkholderiales;f__Burkholderiaceae;g__Aquabacterium;s__	N/A	N/A	N/A	N/A	N/A	N/A	N/A	N/A	N/A	N/A	d__Bacteria;p__Proteobacteria;c__Gammaproteobacteria;o__Burkholderiales;f__Burkholderiaceae;g__Aquabacterium;s__	ANI	N/A	GCF_000768065.1, s__Aquabacterium sp000768065, 95.0, 80.62, 0.55; GCA_001770775.1, s__Aquabacterium sp001770775, 95.0, 80.31, 0.46; GCA_001770725.1, s__Aquabacterium sp001770725, 95.0, 80.2, 0.49; GCA_004297345.1, s__Aquabacterium sp004297345, 95.0, 80.13, 0.45; GCF_005502875.1, s__Aquabacterium sp005502875, 95.0, 80.11, 0.48; GCF_001447195.1, s__Aquabacterium parvum, 95.0, 80.11, 0.49; GCF_00431…	66.45
szas25bin.60	SZ_SZAS25	uncultivable	55.04	0.846	4.94466	0.900524	d__Bacteria;p__Patescibacteria;c__Paceibacteria;o__UBA9983_A;f__UBA9973;g__;s__	N/A	N/A	N/A	N/A	N/A	N/A	N/A	N/A	N/A	N/A	d__Bacteria;p__Patescibacteria;c__Paceibacteria;o__UBA9983_A;f__UBA9973;g__;s__	taxonomic novelty determined using RED	N/A	N/A	35.89
szas25bin.62	SZ_SZAS25	uncultivable	62.54	2.874	4.54377	0.89251	d__Bacteria;p__Proteobacteria;c__Alphaproteobacteria;o__Dongiales;f__Dongiaceae;g__Dongia;s__	N/A	N/A	N/A	N/A	N/A	GCF_004363235.1	95	d__Bacteria;p__Proteobacteria;c__Alphaproteobacteria;o__Dongiales;f__Dongiaceae;g__Dongia;s__Dongia mobilis	77.92	0.41	d__Bacteria;p__Proteobacteria;c__Alphaproteobacteria;o__Dongiales;f__Dongiaceae;g__Dongia;s__	taxonomic classification defined by topology and ANI	N/A	GCF_000620685.1, s__Dongia sp000620685, 95.0, 76.62, 0.37	44.15
szas25bin.63	SZ_SZAS25	uncultivable	58.1	0.755	4.07264	0.853966	d__Bacteria;p__Chlamydiota;c__Chlamydiia;o__Chlamydiales;f__Rhabdochlamydiaceae;g__;s__	N/A	N/A	N/A	N/A	N/A	N/A	N/A	N/A	N/A	N/A	d__Bacteria;p__Chlamydiota;c__Chlamydiia;o__Chlamydiales;f__Rhabdochlamydiaceae;g__;s__	taxonomic novelty determined using RED	N/A	N/A	42.96
szas25bin.65	SZ_SZAS25	uncultivable	54.5	7.369	4.8009	0.790626	d__Bacteria;p__Elusimicrobiota;c__Elusimicrobia;o__F11;f__FEN-1173;g__;s__	N/A	N/A	N/A	N/A	N/A	GCA_003158755.1	95	d__Bacteria;p__Elusimicrobiota;c__Elusimicrobia;o__F11;f__FEN-1173;g__FEN-1173;s__FEN-1173 sp003158755	74.99	0.08	d__Bacteria;p__Elusimicrobiota;c__Elusimicrobia;o__F11;f__;g__;s__	taxonomic classification defined by topology and ANI	N/A	N/A	42.37
szas25bin.66	SZ_SZAS25	uncultivable	59.9	3.775	7.56222	0.75496	d__Bacteria;p__Patescibacteria;c__Saccharimonadia;o__Saccharimonadales;f__;g__;s__	N/A	N/A	N/A	N/A	N/A	N/A	N/A	N/A	N/A	N/A	d__Bacteria;p__Patescibacteria;c__Saccharimonadia;o__Saccharimonadales;f__;g__;s__	taxonomic classification fully defined by topology	N/A	N/A	56.84
szas25bin.7	SZ_SZAS25	uncultivable	92.83	3.541	25.2122	0.876708	d__Bacteria;p__Actinobacteriota;c__Actinomycetia;o__Propionibacteriales;f__Nocardioidaceae;g__Marmoricola;s__	N/A	N/A	N/A	N/A	N/A	N/A	N/A	N/A	N/A	N/A	d__Bacteria;p__Actinobacteriota;c__Actinomycetia;o__Propionibacteriales;f__Nocardioidaceae;g__Marmoricola;s__	ANI	N/A	GCF_001424755.1, s__Marmoricola sp001424755, 95.0, 79.11, 0.42; GCF_003752505.1, s__Marmoricola aurantiacus, 95.0, 79.02, 0.43; GCF_003674065.1, s__Marmoricola sp003674065, 95.0, 78.84, 0.42; GCF_900104965.1, s__Marmoricola scoriae, 95.0, 78.81, 0.44; GCF_000720335.1, s__Marmoricola aequoreus, 95.0, 78.72, 0.4; GCF_003725535.1, s__Marmoricola pocheonensis, 95.0, 78.72, 0.42; GCF_000426045.1, s__M…	88.05
szas25bin.8	SZ_SZAS25	uncultivable	66.2	0.925	17.5962	0.814862	d__Bacteria;p__Patescibacteria;c__Saccharimonadia;o__Saccharimonadales;f__2-12-FULL-41-12;g__;s__	N/A	N/A	N/A	N/A	N/A	GCA_001790445.1	95	d__Bacteria;p__Patescibacteria;c__Saccharimonadia;o__Saccharimonadales;f__2-12-FULL-41-12;g__2-12-FULL-41-12;s__2-12-FULL-41-12 sp001790445	75.77	0.04	d__Bacteria;p__Patescibacteria;c__Saccharimonadia;o__Saccharimonadales;f__;g__;s__	taxonomic classification defined by topology and ANI	N/A	N/A	72.01
szas25bin.9	SZ_SZAS25	uncultivable	58.3	1.363	4.91814	0.949669	d__Bacteria;p__Chloroflexota;c__Anaerolineae;o__Anaerolineales;f__EnvOPS12;g__UBA12294;s__	N/A	N/A	N/A	N/A	N/A	N/A	N/A	N/A	N/A	N/A	d__Bacteria;p__Chloroflexota;c__Anaerolineae;o__Anaerolineales;f__EnvOPS12;g__UBA12294;s__	ANI	N/A	GCA_011331405.1, s__UBA12294 sp011331405, 95.0, 77.22, 0.26; GCA_002418205.1, s__UBA12294 sp002418205, 95.0, 77.09, 0.26; GCA_003577395.1, s__UBA12294 sp003577395, 95.0, 77.06, 0.17; GCA_013360875.1, s__UBA12294 sp013360875, 95.0, 77.06, 0.23; GCA_013388685.1, s__UBA12294 sp013388685, 95.0, 76.85, 0.26; GCA_011362695.1, s__UBA12294 sp011362695, 95.0, 76.45, 0.14; GCA_003484265.1, s__UBA12294 sp00…	56.72
szas3bin.1	SZ_SZAS3	cultivable	84.75	0.574	7.81076	N/A	d__Bacteria;p__Proteobacteria;c__Alphaproteobacteria;o__Rhizobiales;f__Beijerinckiaceae;g__Methylobacterium;s__Methylobacterium organophilum	GCF_003096615.1	95	d__Bacteria;p__Proteobacteria;c__Alphaproteobacteria;o__Rhizobiales;f__Beijerinckiaceae;g__Methylobacterium;s__Methylobacterium organophilum	98.93	0.96	GCF_003096615.1	95	d__Bacteria;p__Proteobacteria;c__Alphaproteobacteria;o__Rhizobiales;f__Beijerinckiaceae;g__Methylobacterium;s__Methylobacterium organophilum	98.93	0.96	d__Bacteria;p__Proteobacteria;c__Alphaproteobacteria;o__Rhizobiales;f__Beijerinckiaceae;g__Methylobacterium;s__	taxonomic classification defined by topology and ANI	topological placement and ANI have congruent species assignments	GCF_900112625.1, s__Methylobacterium sp900112625, 95.0, 93.81, 0.91; GCF_900103195.1, s__Methylobacterium sp900103195, 95.0, 90.78, 0.82; GCF_014138435.1, s__Methylobacterium fujisawaense, 95.0, 90.5, 0.82; GCF_000364445.2, s__Methylobacterium mesophilicum, 95.0, 88.02, 0.81; GCF_009806555.1, s__Methylobacterium sp009806555, 95.0, 87.8, 0.78; GCF_900103445.1, s__Methylobacterium phyllostachyos, 9…	74.79
szas3bin.10	SZ_SZAS3	cultivable	89.31	0.464	228.2	N/A	d__Bacteria;p__Proteobacteria;c__Gammaproteobacteria;o__Burkholderiales;f__Burkholderiaceae;g__Comamonas;s__Comamonas testosteroni_D	GCF_003569915.1	95	d__Bacteria;p__Proteobacteria;c__Gammaproteobacteria;o__Burkholderiales;f__Burkholderiaceae;g__Comamonas;s__Comamonas testosteroni_D	99.73	0.91	GCF_003569915.1	95	d__Bacteria;p__Proteobacteria;c__Gammaproteobacteria;o__Burkholderiales;f__Burkholderiaceae;g__Comamonas;s__Comamonas testosteroni_D	99.73	0.91	d__Bacteria;p__Proteobacteria;c__Gammaproteobacteria;o__Burkholderiales;f__Burkholderiaceae;g__Comamonas;s__	taxonomic classification defined by topology and ANI	topological placement and ANI have congruent species assignments	GCF_008727115.1, s__Comamonas testosteroni_E, 95.0, 84.9, 0.65; GCF_000964545.1, s__Comamonas thiooxydans, 95.0, 84.84, 0.74; GCF_000761245.1, s__Comamonas testosteroni_C, 95.0, 84.78, 0.74; GCF_014076415.1, s__Comamonas testosteroni_F, 95.0, 84.76, 0.74; GCF_000739375.1, s__Comamonas testosteroni_B, 95.0, 84.73, 0.74; GCF_000241525.1, s__Comamonas testosteroni, 95.0, 84.7, 0.73; GCF_002754475.1,…	87.79
szas3bin.11	SZ_SZAS3	cultivable	99.32	3.378	41.5474	0.953456	d__Bacteria;p__Verrucomicrobiota;c__Verrucomicrobiae;o__Opitutales;f__Opitutaceae;g__Didemnitutus;s__	N/A	N/A	N/A	N/A	N/A	N/A	N/A	N/A	N/A	N/A	d__Bacteria;p__Verrucomicrobiota;c__Verrucomicrobiae;o__Opitutales;f__Opitutaceae;g__Didemnitutus;s__	taxonomic classification defined by topology and ANI	N/A	GCA_013822585.1, s__Didemnitutus sp013822585, 95.0, 80.64, 0.66; GCA_013821985.1, s__Didemnitutus sp013821985, 95.0, 80.35, 0.5; GCA_903885525.1, s__Didemnitutus sp903885525, 95.0, 78.26, 0.36; GCA_002591725.1, s__Didemnitutus mandela, 95.0, 76.86, 0.11	88.7
szas3bin.12	SZ_SZAS3	cultivable	93.53	6.916	75.1414	N/A	d__Bacteria;p__Proteobacteria;c__Gammaproteobacteria;o__Xanthomonadales;f__Xanthomonadaceae;g__Pseudoxanthomonas_A;s__Pseudoxanthomonas_A mexicana	GCF_010093385.1	95	d__Bacteria;p__Proteobacteria;c__Gammaproteobacteria;o__Xanthomonadales;f__Xanthomonadaceae;g__Pseudoxanthomonas_A;s__Pseudoxanthomonas_A mexicana	96.87	0.85	GCF_010093385.1	95	d__Bacteria;p__Proteobacteria;c__Gammaproteobacteria;o__Xanthomonadales;f__Xanthomonadaceae;g__Pseudoxanthomonas_A;s__Pseudoxanthomonas_A mexicana	96.87	0.85	d__Bacteria;p__Proteobacteria;c__Gammaproteobacteria;o__Xanthomonadales;f__Xanthomonadaceae;g__Pseudoxanthomonas_A;s__	taxonomic classification defined by topology and ANI	topological placement and ANI have congruent species assignments	GCF_001427585.1, s__Pseudoxanthomonas_A sp001427585, 95.0, 88.0, 0.83; GCF_900104255.1, s__Pseudoxanthomonas_A sp900104255, 95.0, 87.79, 0.82; GCF_900116385.1, s__Pseudoxanthomonas_A sp900116385, 95.0, 87.52, 0.82; GCF_001427635.1, s__Pseudoxanthomonas_A sp001427635, 95.0, 87.34, 0.82; GCF_010093445.1, s__Pseudoxanthomonas_A japonensis, 95.0, 87.33, 0.8; GCA_002863005.1, s__Pseudoxanthomonas_A sp…	74.65
szas3bin.13	SZ_SZAS3	cultivable	61.2	2.586	7.84179	0.971974	d__Bacteria;p__Proteobacteria;c__Gammaproteobacteria;o__Xanthomonadales;f__Xanthomonadaceae;g__SCMT01;s__	N/A	N/A	N/A	N/A	N/A	GCF_005502915.1	95	d__Bacteria;p__Proteobacteria;c__Gammaproteobacteria;o__Xanthomonadales;f__Xanthomonadaceae;g__SCMT01;s__SCMT01 sp005502915	84.14	0.68	d__Bacteria;p__Proteobacteria;c__Gammaproteobacteria;o__Xanthomonadales;f__Xanthomonadaceae;g__SCMT01;s__	taxonomic classification defined by topology and ANI	N/A	GCA_011526085.1, s__SCMT01 sp011526085, 95.0, 84.42, 0.73; GCA_013141175.1, s__SCMT01 sp013141175, 95.0, 82.55, 0.67; GCA_008015835.1, s__SCMT01 sp008015835, 95.0, 81.32, 0.62; GCA_008015095.1, s__SCMT01 sp008015095, 95.0, 78.8, 0.36	56.28
szas3bin.14	SZ_SZAS3	cultivable	87.52	3.785	7.5379	0.984738	d__Bacteria;p__Proteobacteria;c__Alphaproteobacteria;o__Sphingomonadales;f__Sphingomonadaceae;g__Sphingomonas;s__	N/A	N/A	N/A	N/A	N/A	N/A	N/A	N/A	N/A	N/A	d__Bacteria;p__Proteobacteria;c__Alphaproteobacteria;o__Sphingomonadales;f__Sphingomonadaceae;g__Sphingomonas;s__	taxonomic classification defined by topology and ANI	N/A	GCA_001897375.1, s__Sphingomonas sp001897375, 95.0, 86.81, 0.72; GCF_013344685.1, s__Sphingomonas sp013344685, 95.0, 86.64, 0.72; GCF_014204695.1, s__Sphingomonas sp001897045, 95.0, 83.76, 0.71; GCF_005502745.1, s__Sphingomonas sp005502745, 95.0, 82.56, 0.58; GCF_002374855.1, s__Sphingomonas adhaesiva, 95.0, 80.96, 0.53; GCF_002374835.1, s__Sphingomonas ginsenosidimutans, 95.0, 80.93, 0.53; GCA_0…	72.62
szas3bin.15	SZ_SZAS3	cultivable	97.47	0.663	30.3098	N/A	d__Bacteria;p__Proteobacteria;c__Gammaproteobacteria;o__Burkholderiales;f__Rhodocyclaceae;g__Azospira;s__Azospira suillum	GCF_004217225.1	95	d__Bacteria;p__Proteobacteria;c__Gammaproteobacteria;o__Burkholderiales;f__Rhodocyclaceae;g__Azospira;s__Azospira suillum	98.18	0.9	GCF_004217225.1	95	d__Bacteria;p__Proteobacteria;c__Gammaproteobacteria;o__Burkholderiales;f__Rhodocyclaceae;g__Azospira;s__Azospira suillum	98.18	0.9	d__Bacteria;p__Proteobacteria;c__Gammaproteobacteria;o__Burkholderiales;f__Rhodocyclaceae;g__Azospira;s__	taxonomic classification defined by topology and ANI	topological placement and ANI have congruent species assignments	GCF_003112695.1, s__Azospira sp003112695, 95.0, 88.17, 0.73	94.02
szas3bin.16	SZ_SZAS3	cultivable	97.81	0.436	177.634	0.940855	d__Bacteria;p__Proteobacteria;c__Alphaproteobacteria;o__Dongiales;f__Dongiaceae;g__Dongia;s__	N/A	N/A	N/A	N/A	N/A	GCF_004363235.1	95	d__Bacteria;p__Proteobacteria;c__Alphaproteobacteria;o__Dongiales;f__Dongiaceae;g__Dongia;s__Dongia mobilis	80.93	0.58	d__Bacteria;p__Proteobacteria;c__Alphaproteobacteria;o__Dongiales;f__Dongiaceae;g__Dongia;s__	taxonomic classification defined by topology and ANI	N/A	GCF_000620685.1, s__Dongia sp000620685, 95.0, 77.99, 0.3	95.65
szas3bin.17	SZ_SZAS3	cultivable	95.48	1.406	43.1895	N/A	d__Bacteria;p__Proteobacteria;c__Gammaproteobacteria;o__Pseudomonadales;f__Pseudomonadaceae;g__Pseudomonas_E;s__Pseudomonas_E alcaligenes	GCF_000467105.1	95	d__Bacteria;p__Proteobacteria;c__Gammaproteobacteria;o__Pseudomonadales;f__Pseudomonadaceae;g__Pseudomonas_E;s__Pseudomonas_E alcaligenes	96.89	0.91	GCF_000467105.1	95	d__Bacteria;p__Proteobacteria;c__Gammaproteobacteria;o__Pseudomonadales;f__Pseudomonadaceae;g__Pseudomonas_E;s__Pseudomonas_E alcaligenes	96.89	0.91	d__Bacteria;p__Proteobacteria;c__Gammaproteobacteria;o__Pseudomonadales;f__Pseudomonadaceae;g__Pseudomonas_E;s__	taxonomic classification defined by topology and ANI	topological placement and ANI have congruent species assignments	GCF_900156545.1, s__Pseudomonas_E alcaligenes_A, 95.0, 94.5, 0.86; GCF_003205495.1, s__Pseudomonas_E alcaligenes_B, 95.0, 91.39, 0.82; GCF_005508865.1, s__Pseudomonas_E sp005508865, 95.0, 89.51, 0.84; GCF_000761545.1, s__Pseudomonas_E sp000761545, 95.0, 88.85, 0.81; GCA_002483005.1, s__Pseudomonas_E sp002483005, 95.0, 88.06, 0.66; GCF_902506505.1, s__Pseudomonas_E sp902506505, 95.0, 87.37, 0.77; …	90.45
szas3bin.18	SZ_SZAS3	cultivable	99.56	0.869	23.8026	0.938827	d__Bacteria;p__Proteobacteria;c__Alphaproteobacteria;o__SHVZ01;f__SHVZ01;g__SHVZ01;s__	N/A	N/A	N/A	N/A	N/A	GCA_009694025.1	95	d__Bacteria;p__Proteobacteria;c__Alphaproteobacteria;o__SHVZ01;f__SHVZ01;g__SHVZ01;s__SHVZ01 sp009694025	83.39	0.8	d__Bacteria;p__Proteobacteria;c__Alphaproteobacteria;o__;f__;g__;s__	taxonomic classification defined by topology and ANI	N/A	N/A	97.04
szas3bin.19	SZ_SZAS3	cultivable	91.26	1.496	19.1254	N/A	d__Bacteria;p__Proteobacteria;c__Gammaproteobacteria;o__Burkholderiales;f__Burkholderiaceae;g__Acidovorax_C;s__Acidovorax_C sp011303755	GCF_011303755.1	95	d__Bacteria;p__Proteobacteria;c__Gammaproteobacteria;o__Burkholderiales;f__Burkholderiaceae;g__Acidovorax_C;s__Acidovorax_C sp011303755	96.39	0.9	GCF_011303755.1	95	d__Bacteria;p__Proteobacteria;c__Gammaproteobacteria;o__Burkholderiales;f__Burkholderiaceae;g__Acidovorax_C;s__Acidovorax_C sp011303755	96.39	0.9	d__Bacteria;p__Proteobacteria;c__Gammaproteobacteria;o__Burkholderiales;f__Burkholderiaceae;g__Acidovorax_C;s__	taxonomic classification defined by topology and ANI	topological placement and ANI have congruent species assignments	GCA_001725235.1, s__Acidovorax_C sp001725235, 95.0, 84.3, 0.77; GCF_001298675.1, s__Acidovorax_C caeni, 95.0, 83.16, 0.73	95.08
szas3bin.2	SZ_SZAS3	cultivable	99.5	1.492	46.556	0.937061	d__Bacteria;p__Proteobacteria;c__Alphaproteobacteria;o__Ferrovibrionales;f__Ferrovibrionaceae;g__Ferrovibrio;s__	N/A	N/A	N/A	N/A	N/A	N/A	N/A	N/A	N/A	N/A	d__Bacteria;p__Proteobacteria;c__Alphaproteobacteria;o__Ferrovibrionales;f__Ferrovibrionaceae;g__Ferrovibrio;s__	taxonomic classification defined by topology and ANI	N/A	GCF_007197755.1, s__Ferrovibrio terrae, 95.0, 82.77, 0.68; GCA_002796975.1, s__Ferrovibrio sp002796975, 95.0, 82.66, 0.67; GCA_002482765.1, s__Ferrovibrio sp002482765, 95.0, 79.94, 0.46	96.55
szas3bin.20	SZ_SZAS3	cultivable	92.03	0.497	13.8609	0.903216	d__Bacteria;p__Proteobacteria;c__Alphaproteobacteria;o__Rhodospirillales;f__Rhodospirillaceae;g__;s__	N/A	N/A	N/A	N/A	N/A	N/A	N/A	N/A	N/A	N/A	d__Bacteria;p__Proteobacteria;c__Alphaproteobacteria;o__Rhodospirillales;f__Rhodospirillaceae;g__;s__	taxonomic novelty determined using RED	N/A	N/A	77.78
szas3bin.21	SZ_SZAS3	cultivable	81.19	3.448	8.44144	N/A	d__Bacteria;p__Proteobacteria;c__Gammaproteobacteria;o__Burkholderiales;f__Aquaspirillaceae;g__Rivicola;s__Rivicola pingtungensis	GCF_003201855.1	95	d__Bacteria;p__Proteobacteria;c__Gammaproteobacteria;o__Burkholderiales;f__Aquaspirillaceae;g__Rivicola;s__Rivicola pingtungensis	97.39	0.94	GCF_003201855.1	95	d__Bacteria;p__Proteobacteria;c__Gammaproteobacteria;o__Burkholderiales;f__Aquaspirillaceae;g__Rivicola;s__Rivicola pingtungensis	97.39	0.94	d__Bacteria;p__Proteobacteria;c__Gammaproteobacteria;o__Burkholderiales;f__Aquaspirillaceae;g__Rivicola;s__	taxonomic classification defined by topology and ANI	topological placement and ANI have congruent species assignments	GCF_002002905.1, s__Rivicola sp002002905, 95.0, 85.4, 0.82	69.98
szas3bin.22	SZ_SZAS3	cultivable	99.53	2.336	20.6438	0.987714	d__Bacteria;p__Proteobacteria;c__Gammaproteobacteria;o__Burkholderiales;f__Burkholderiaceae;g__WAJ17;s__	N/A	N/A	N/A	N/A	N/A	GCF_014174515.1	95	d__Bacteria;p__Proteobacteria;c__Gammaproteobacteria;o__Burkholderiales;f__Burkholderiaceae;g__WAJ17;s__WAJ17 sp014174515	87.88	0.77	d__Bacteria;p__Proteobacteria;c__Gammaproteobacteria;o__Burkholderiales;f__Burkholderiaceae;g__;s__	taxonomic classification defined by topology and ANI	N/A	N/A	94.34
szas3bin.23	SZ_SZAS3	cultivable	51.72	1.724	9.10887	0.896152	d__Bacteria;p__Proteobacteria;c__Alphaproteobacteria;o__Acetobacterales;f__Acetobacteraceae;g__;s__	N/A	N/A	N/A	N/A	N/A	N/A	N/A	N/A	N/A	N/A	d__Bacteria;p__Proteobacteria;c__Alphaproteobacteria;o__Acetobacterales;f__Acetobacteraceae;g__;s__	taxonomic novelty determined using RED	N/A	N/A	51.42
szas3bin.24	SZ_SZAS3	cultivable	100	7.496	10.0329	0.991547	d__Bacteria;p__Proteobacteria;c__Alphaproteobacteria;o__Sphingomonadales;f__Sphingomonadaceae;g__Sphingomonas;s__	N/A	N/A	N/A	N/A	N/A	GCF_009789535.1	95	d__Bacteria;p__Proteobacteria;c__Alphaproteobacteria;o__Sphingomonadales;f__Sphingomonadaceae;g__Sphingomonas;s__Sphingomonas carotinifaciens	90.27	0.8	d__Bacteria;p__Proteobacteria;c__Alphaproteobacteria;o__Sphingomonadales;f__Sphingomonadaceae;g__Sphingomonas;s__	taxonomic classification defined by topology and ANI	N/A	GCF_000787715.1, s__Sphingomonas parapaucimobilis, 95.0, 82.0, 0.56; GCF_014199595.1, s__Sphingomonas yabuuchiae, 95.0, 81.8, 0.56; GCF_014196255.1, s__Sphingomonas pseudosanguinis, 95.0, 81.8, 0.57; GCF_000739895.2, s__Sphingomonas paucimobilis, 95.0, 81.78, 0.55; GCF_001591005.1, s__Sphingomonas sanguinis, 95.0, 81.64, 0.53; GCF_014197135.1, s__Sphingomonas zeae, 95.0, 81.58, 0.54; GCF_00147690…	86.88
szas3bin.25	SZ_SZAS3	cultivable	96.1	1.869	17.5731	0.976619	d__Bacteria;p__Proteobacteria;c__Gammaproteobacteria;o__Burkholderiales;f__Burkholderiaceae;g__Piscinibacter;s__	N/A	N/A	N/A	N/A	N/A	GCA_007994965.1	95	d__Bacteria;p__Proteobacteria;c__Gammaproteobacteria;o__Burkholderiales;f__Burkholderiaceae;g__Piscinibacter;s__Piscinibacter aquaticus	88.38	0.72	d__Bacteria;p__Proteobacteria;c__Gammaproteobacteria;o__Burkholderiales;f__Burkholderiaceae;g__Piscinibacter;s__	taxonomic classification defined by topology and ANI	N/A	GCF_004011805.1, s__Piscinibacter defluvii, 95.0, 86.41, 0.75; GCA_003265685.1, s__Piscinibacter caeni, 95.0, 85.9, 0.69	88.35
szas3bin.26	SZ_SZAS3	cultivable	96.51	2.487	39.8521	0.905615	d__Bacteria;p__Proteobacteria;c__Alphaproteobacteria;o__Rhodospirillales;f__Rhodospirillaceae;g__;s__	N/A	N/A	N/A	N/A	N/A	N/A	N/A	N/A	N/A	N/A	d__Bacteria;p__Proteobacteria;c__Alphaproteobacteria;o__Rhodospirillales;f__Rhodospirillaceae;g__;s__	taxonomic novelty determined using RED	N/A	N/A	96.41
szas3bin.27	SZ_SZAS3	cultivable	98.7	0	12.4401	N/A	d__Bacteria;p__Proteobacteria;c__Gammaproteobacteria;o__Pseudomonadales;f__Moraxellaceae;g__Acinetobacter;s__Acinetobacter baumannii	GCF_009759685.1	95	d__Bacteria;p__Proteobacteria;c__Gammaproteobacteria;o__Pseudomonadales;f__Moraxellaceae;g__Acinetobacter;s__Acinetobacter baumannii	97.85	0.89	GCF_009759685.1	95	d__Bacteria;p__Proteobacteria;c__Gammaproteobacteria;o__Pseudomonadales;f__Moraxellaceae;g__Acinetobacter;s__Acinetobacter baumannii	97.85	0.89	d__Bacteria;p__Proteobacteria;c__Gammaproteobacteria;o__Pseudomonadales;f__Moraxellaceae;g__Acinetobacter;s__	taxonomic classification defined by topology and ANI	topological placement and ANI have congruent species assignments	GCF_000368085.1, s__Acinetobacter nosocomialis, 95.0, 92.06, 0.85; GCF_000368065.1, s__Acinetobacter seifertii, 95.0, 90.67, 0.87; GCF_000369045.1, s__Acinetobacter pittii, 95.0, 89.13, 0.83; GCF_002928115.1, s__Acinetobacter pittii_H, 95.0, 88.97, 0.84; GCF_013009345.1, s__Acinetobacter sp013009345, 95.0, 88.93, 0.85; GCF_001605885.1, s__Acinetobacter lactucae, 95.0, 88.55, 0.84; GCF_013344765.1…	93.94
szas3bin.28	SZ_SZAS3	cultivable	98.56	0.2	22.9614	N/A	d__Bacteria;p__Proteobacteria;c__Gammaproteobacteria;o__Burkholderiales;f__Burkholderiaceae;g__Duganella;s__Duganella danionis	GCF_009720775.1	95	d__Bacteria;p__Proteobacteria;c__Gammaproteobacteria;o__Burkholderiales;f__Burkholderiaceae;g__Duganella;s__Duganella danionis	95.32	0.94	GCF_009857835.1	95	d__Bacteria;p__Proteobacteria;c__Gammaproteobacteria;o__Burkholderiales;f__Burkholderiaceae;g__Duganella;s__Duganella fentianensis	94.18	0.91	d__Bacteria;p__Proteobacteria;c__Gammaproteobacteria;o__Burkholderiales;f__Burkholderiaceae;g__Duganella;s__	ANI	topological placement and ANI have incongruent species assignments	GCF_009857915.1, s__Duganella sp009857915, 95.0, 89.33, 0.89; GCF_009380215.1, s__Duganella sp009380215, 95.0, 83.09, 0.73; GCF_000335815.1, s__Duganella sp000335815, 95.0, 82.94, 0.74; GCF_003416895.1, s__Duganella sp003416895, 95.0, 82.82, 0.72; GCF_013375995.1, s__Duganella sp013375995, 95.0, 82.74, 0.71; GCF_000381565.1, s__Duganella sp000381565, 95.0, 82.64, 0.74; GCF_003416985.1, s__Duganel…	98.45
szas3bin.29	SZ_SZAS3	cultivable	77.56	0.539	101.496	N/A	d__Bacteria;p__Proteobacteria;c__Gammaproteobacteria;o__Enterobacterales;f__Enterobacteriaceae;g__Enterobacter;s__Enterobacter cloacae	GCF_000025565.1	95	d__Bacteria;p__Proteobacteria;c__Gammaproteobacteria;o__Enterobacterales;f__Enterobacteriaceae;g__Enterobacter;s__Enterobacter cloacae	98.68	0.9	GCF_000025565.1	95	d__Bacteria;p__Proteobacteria;c__Gammaproteobacteria;o__Enterobacterales;f__Enterobacteriaceae;g__Enterobacter;s__Enterobacter cloacae	98.68	0.9	d__Bacteria;p__Proteobacteria;c__Gammaproteobacteria;o__Enterobacterales;f__Enterobacteriaceae;g__Enterobacter;s__	taxonomic classification defined by topology and ANI	topological placement and ANI have congruent species assignments	GCF_002939185.1, s__Enterobacter sichuanensis, 95.0, 88.98, 0.76; GCF_001022965.1, s__Enterobacter cloacae_L, 95.0, 88.96, 0.84; GCF_004402045.1, s__Enterobacter nimipressuralis_A, 95.0, 88.82, 0.83; GCF_001729805.1, s__Enterobacter roggenkampii, 95.0, 88.8, 0.78; GCF_001521715.1, s__Enterobacter asburiae, 96.8818, 88.76, 0.77; GCF_007035645.1, s__Enterobacter asburiae_B, 96.8818, 88.75, 0.78; GC…	63.55
szas3bin.30	SZ_SZAS3	cultivable	82.58	1.99	13.0365	0.965915	d__Bacteria;p__Proteobacteria;c__Alphaproteobacteria;o__Acetobacterales;f__Acetobacteraceae;g__Roseomonas_B;s__	N/A	N/A	N/A	N/A	N/A	GCA_014644535.1	95	d__Bacteria;p__Proteobacteria;c__Alphaproteobacteria;o__Acetobacterales;f__Acetobacteraceae;g__Roseomonas_B;s__Roseomonas_B lacus	83.05	0.66	d__Bacteria;p__Proteobacteria;c__Alphaproteobacteria;o__Acetobacterales;f__Acetobacteraceae;g__Roseomonas_B;s__	taxonomic classification defined by topology and ANI	N/A	GCF_012163135.1, s__Roseomonas_B oryzicola, 95.0, 83.63, 0.6; GCF_012927745.1, s__Roseomonas_B sp012927745, 95.0, 83.48, 0.59; GCF_014199195.1, s__Roseomonas_B alkaliterrae, 95.0, 82.9, 0.63; GCA_001464375.1, s__Roseomonas_B sp001464375, 95.0, 82.02, 0.58; GCF_005222755.1, s__Roseomonas_B sp005222755, 95.0, 81.94, 0.56; GCA_903844785.1, s__Roseomonas_B sp903844785, 95.0, 76.82, 0.26; GCA_90392746…	75.94
szas3bin.31	SZ_SZAS3	cultivable	60.81	8.62	13.1052	N/A	d__Bacteria;p__Proteobacteria;c__Gammaproteobacteria;o__Enterobacterales;f__Enterobacteriaceae;g__Enterobacter;s__Enterobacter roggenkampii	GCF_001729805.1	95	d__Bacteria;p__Proteobacteria;c__Gammaproteobacteria;o__Enterobacterales;f__Enterobacteriaceae;g__Enterobacter;s__Enterobacter roggenkampii	98.42	0.85	GCF_001729805.1	95	d__Bacteria;p__Proteobacteria;c__Gammaproteobacteria;o__Enterobacterales;f__Enterobacteriaceae;g__Enterobacter;s__Enterobacter roggenkampii	98.42	0.85	d__Bacteria;p__Proteobacteria;c__Gammaproteobacteria;o__Enterobacterales;f__Enterobacteriaceae;g__Enterobacter;s__	taxonomic classification defined by topology and ANI	topological placement and ANI have congruent species assignments	GCF_004006055.1, s__Enterobacter cloacae_K, 95.0, 94.05, 0.81; GCF_009755685.1, s__Enterobacter sp000568095, 95.0476, 93.97, 0.81; GCF_007035645.1, s__Enterobacter asburiae_B, 96.8818, 93.04, 0.79; GCF_000762975.1, s__Enterobacter sp000762975, 96.45, 92.99, 0.79; GCF_002208095.1, s__Enterobacter cloacae_M, 96.7528, 92.92, 0.81; GCF_003634515.1, s__Enterobacter asburiae_A, 96.0274, 92.9, 0.82; GCF…	46.04
szas3bin.4	SZ_SZAS3	cultivable	60.81	4.477	8.16328	0.704097	d__Bacteria;p__Proteobacteria;c__Alphaproteobacteria;o__Acetobacterales;f__;g__;s__	N/A	N/A	N/A	N/A	N/A	N/A	N/A	N/A	N/A	N/A	d__Bacteria;p__Proteobacteria;c__Alphaproteobacteria;o__;f__;g__;s__	taxonomic novelty determined using RED	N/A	N/A	47.47
szas3bin.5	SZ_SZAS3	cultivable	75.81	2.695	6.85876	N/A	d__Bacteria;p__Actinobacteriota;c__Actinomycetia;o__Actinomycetales;f__Microbacteriaceae;g__Microbacterium;s__Microbacterium aurum	GCF_001974985.1	95	d__Bacteria;p__Actinobacteriota;c__Actinomycetia;o__Actinomycetales;f__Microbacteriaceae;g__Microbacterium;s__Microbacterium aurum	95.95	0.83	GCF_001974985.1	95	d__Bacteria;p__Actinobacteriota;c__Actinomycetia;o__Actinomycetales;f__Microbacteriaceae;g__Microbacterium;s__Microbacterium aurum	95.95	0.83	d__Bacteria;p__Actinobacteriota;c__Actinomycetia;o__Actinomycetales;f__Microbacteriaceae;g__Microbacterium;s__	taxonomic classification defined by topology and ANI	topological placement and ANI have congruent species assignments	GCA_001898315.1, s__Microbacterium sp001898315, 95.0, 84.65, 0.68; GCF_006716815.1, s__Microbacterium lacticum, 95.0, 84.63, 0.67; GCA_003248655.1, s__Microbacterium sp003248655, 95.0, 83.72, 0.68; GCF_001592125.1, s__Microbacterium hominis, 95.0, 83.63, 0.68; GCF_001584605.1, s__Microbacterium laevaniformans_A, 95.0, 82.9, 0.64; GCF_000411455.1, s__Microbacterium sp000411455, 95.0, 82.86, 0.66; …	61.88
szas3bin.6	SZ_SZAS3	cultivable	98.25	2.052	21.5733	0.968815	d__Bacteria;p__Proteobacteria;c__Alphaproteobacteria;o__Dongiales;f__Dongiaceae;g__Dongia;s__	N/A	N/A	N/A	N/A	N/A	GCF_000620685.1	95	d__Bacteria;p__Proteobacteria;c__Alphaproteobacteria;o__Dongiales;f__Dongiaceae;g__Dongia;s__Dongia sp000620685	84.82	0.73	d__Bacteria;p__Proteobacteria;c__Alphaproteobacteria;o__Dongiales;f__Dongiaceae;g__Dongia;s__	taxonomic classification defined by topology and ANI	N/A	GCF_004363235.1, s__Dongia mobilis, 95.0, 79.14, 0.44	96.47
szas3bin.7	SZ_SZAS3	cultivable	99.36	0.316	17.0199	0.964293	d__Bacteria;p__Proteobacteria;c__Alphaproteobacteria;o__Rhizobiales;f__Xanthobacteraceae;g__Afipia;s__	N/A	N/A	N/A	N/A	N/A	N/A	N/A	N/A	N/A	N/A	d__Bacteria;p__Proteobacteria;c__Alphaproteobacteria;o__Rhizobiales;f__Xanthobacteraceae;g__Afipia;s__	taxonomic classification defined by topology and ANI	N/A	GCA_001897905.1, s__Afipia sp001897905, 95.0, 83.32, 0.65; GCF_000314675.2, s__Afipia broomeae, 95.0, 82.79, 0.6; GCF_000497575.1, s__Afipia sp000497575, 95.0, 82.64, 0.56; GCF_000336555.1, s__Afipia clevelandensis, 95.0, 82.59, 0.61; GCF_001006325.2, s__Afipia massiliensis_A, 95.0, 82.53, 0.56; GCA_001897755.1, s__Afipia sp001897755, 95.0, 82.39, 0.59; GCF_014203115.1, s__Afipia massiliensis, 95…	96.62
szas3bin.8	SZ_SZAS3	cultivable	91.44	4.662	83.4005	N/A	d__Bacteria;p__Proteobacteria;c__Gammaproteobacteria;o__Enterobacterales;f__Enterobacteriaceae;g__Escherichia;s__Escherichia coli	GCF_003697165.2	96.8144	d__Bacteria;p__Proteobacteria;c__Gammaproteobacteria;o__Enterobacterales;f__Enterobacteriaceae;g__Escherichia;s__Escherichia coli	99.37	0.89	GCF_003697165.2	96.8144	d__Bacteria;p__Proteobacteria;c__Gammaproteobacteria;o__Enterobacterales;f__Enterobacteriaceae;g__Escherichia;s__Escherichia coli	99.37	0.89	d__Bacteria;p__Proteobacteria;c__Gammaproteobacteria;o__Enterobacterales;f__Enterobacteriaceae;g__Escherichia;s__	taxonomic classification defined by topology and ANI	topological placement and ANI have congruent species assignments	GCF_000026325.1, s__Escherichia coli_D, 96.9551, 96.84, 0.84; GCF_002950215.1, s__Escherichia flexneri, 97.0028, 96.4, 0.79; GCF_002949675.1, s__Escherichia dysenteriae, 97.0028, 96.14, 0.76; GCA_003018335.1, s__Escherichia coli_C, 96.1333, 95.87, 0.84; GCF_002965065.1, s__Escherichia sp002965065, 95.0, 94.22, 0.72; GCF_005843885.1, s__Escherichia sp005843885, 95.0, 92.64, 0.81; GCF_004211955.1, …	73.28
[truncated: 245 more rows]

## Sheet: TableS4_eggNOGs annotation
eggNOG	p.Fisher	FDR	Uncultivable_frequency	Cultivable_frequency	Cul_fre/Uncul_fre	Annotation
COG2900	5.27e-10	1.02923e-06	0.172414	0.801802	4.65045	SlyX
[truncated: 75 more rows]
